# Supplementary material for: Longitudinal analysis of pain in patients with metastatic prostate cancer using natural language processing of medical record text
Source: PubMed Central journal article supplement — J Am Med Inform Assoc. 2012 Nov 9;20(5):898–905. doi: 10.1136/amiajnl-2012-001076 (PMC3756253; doi:10.1136/amiajnl-2012-001076), 2012-11-09
Supplement: amiajnl-2012-001076-s1.pdf [file amiajnl-2012-001076-s1.pdf]

**ONLINE APPENDIX to:**

**Longitudinal analysis of pain in metastatic prostate cancer patients using natural language processing of medical record text**

Norris H Heintzelman<sup>1</sup>, Robert J Taylor<sup>2</sup>, Lone Simonsen<sup>2</sup>, Roger Lustig<sup>2</sup>, Doug Anderko<sup>1</sup>, Jennifer Haythornthwaite<sup>3</sup>, Lois C Childs<sup>1</sup>, and G Steven Bova<sup>4§</sup>

<sup>1</sup>Lockheed Martin Corporation Information Systems and Global Solutions, Valley Forge, PA, USA, <sup>2</sup>Sage Analytica, Bethesda, MD, USA, <sup>3</sup>Johns Hopkins University School of Medicine <sup>3</sup>Center for Mind-Body Research, <sup>3</sup>Department of Psychiatry, and <sup>4</sup>Departments of Pathology, Oncology, Urology, and Health Sciences Informatics, Johns Hopkins University School of Medicine, Baltimore, Maryland, USA;

**Contents**

|                                                                                         |    |
|-----------------------------------------------------------------------------------------|----|
| Supplementary Information .....                                                         | 3  |
| Data Curation Methods .....                                                             | 3  |
| NLP System .....                                                                        | 4  |
| UMLS Normalization. ....                                                                | 5  |
| Date Resolution .....                                                                   | 6  |
| Statistical Analysis Variables.....                                                     | 7  |
| Appendix Table 1: Univariate analysis of Pain and Other Clinical Parameters .....       | 8  |
| Examples of inter-annotator disagreements. ....                                         | 9  |
| Appendix Table 2. Pain Severity Contextual Rules .....                                  | 10 |
| Appendix Table 3. UMLS 2010AB 35 Level 0 Source Vocabularies used for NLP. ....         | 13 |
| Appendix Table 4. UMLS Semantic Types Included in Vocabulary .....                      | 15 |
| Appendix Table 5. Sign and Symptom Strings indicating Pain .....                        | 16 |
| Appendix Table 6 – Examples of Inter Annotator Agreement and Disagreement .....         | 26 |
| Appendix Figure 1 Example of NLP pattern matching and system component interaction..... | 27 |
| Appendix Figure 2 Subject Group Pain Summary Display.....                               | 29 |
| i2b2 Discharge Summary Text Evaluation – Detailed Description .....                     | 30 |
| Formatting processes .....                                                              | 30 |

|                                                                                                                                                                                                                                                                                                                                     |     |
|-------------------------------------------------------------------------------------------------------------------------------------------------------------------------------------------------------------------------------------------------------------------------------------------------------------------------------------|-----|
| Created Dev and Test Sets .....                                                                                                                                                                                                                                                                                                     | 31  |
| Appendix Table 7 - i2b2 Corpus Measures and Comparison with Subsets.....                                                                                                                                                                                                                                                            | 33  |
| Appendix Figure 3 - Comparison of Mean Values across the 4 Subset Corpora .....                                                                                                                                                                                                                                                     | 35  |
| i2b2 Discharge Summary Text Corpus Inter-Annotator Agreement.....                                                                                                                                                                                                                                                                   | 36  |
| Appendix Table 8 - i2b2 Corpus Inter-Annotator Agreement on (A) Pain Mention, Pain Start and End Date and Body Location, and (B) Pain Category.....                                                                                                                                                                                 | 36  |
| Initial System Score on Blind Set .....                                                                                                                                                                                                                                                                                             | 36  |
| Appendix Table 9 - Initial Accuracy of NLP Algorithm Extraction of Pain Mentions on the 30 file blind i2b2 Corpus- (A) Pain Mention, Pain Start and End Date, and Body Location and (B) Pain Category (TP: True Positive, INC: Incorrect, FN: False Negative, FP: False Positive, Rec: Recall, PRE: Precision, F-M: F-Measure)..... | 37  |
| Development on i2b2 corpus.....                                                                                                                                                                                                                                                                                                     | 37  |
| Appendix Table 10 - Final Accuracy of NLP Algorithm Extraction of Pain Mentions on the blind i2b2 Corpus (TP: True Positive, INC: Incorrect, FN: False Negative, FP: False Positive, Rec: Recall, PRE: Precision, F-M: F-Measure).....                                                                                              | 38  |
| Differences between PELICAN and i2b2 text Corpora .....                                                                                                                                                                                                                                                                             | 39  |
| Named Entities .....                                                                                                                                                                                                                                                                                                                | 39  |
| Differences in Dates and Times.....                                                                                                                                                                                                                                                                                                 | 39  |
| More past tense descriptions.....                                                                                                                                                                                                                                                                                                   | 40  |
| More Hypothetical wordings .....                                                                                                                                                                                                                                                                                                    | 40  |
| Pain descriptions follow slightly different patterns .....                                                                                                                                                                                                                                                                          | 41  |
| Appendix Table 11 – Pain concepts that automatically mapped to severity level (given the absence of other contextual information such as negation). .....                                                                                                                                                                           | 41  |
| Annotation Instructions for the i2b2 discharge reports corpus .....                                                                                                                                                                                                                                                                 | 42  |
| Target List of Documents .....                                                                                                                                                                                                                                                                                                      | 44  |
| XML version of adjudicated Pain Annotations on i2b2 test set .....                                                                                                                                                                                                                                                                  | 45  |
| XML version of all extracted and scored pain concept mentions from the i2b2 test set .....                                                                                                                                                                                                                                          | 220 |
| Appendix References.....                                                                                                                                                                                                                                                                                                            | 710 |

## Supplementary Information

### Data Curation Methods

**Creation of an Electronic Version of the Medical Record for each Subject.** An electronic version of the paper medical record for each PELICAN study subject was created as follows. Imaging of 23,887 pages of paper records was performed with a Savin 8570 scanner at 300 dpi, with automatic conversion to .pdf documents, or with a Brother MFC 8840D scanner using similar settings. Typewritten documents with good contrast and few or no tables or graphics underwent optical character recognition (OCR) conversion to electronic text using ScanSoft Omnipage 14.0 followed by manual comparison of the imaged document and the OCR text by a medically trained team member. All created electronic documents were quality checked by at least one other medically-trained member of the project team. Electronic content was standardized to the content of the paper record. Errors such as misspellings that were present in the paper record were left in place in the study electronic record. OCR-introduced spelling and other errors were corrected. A spot check of records revealed greater than 99% fidelity between paper and electronic record content.

**Records obtained from Electronic Sources.** None of the institutions caring for subjects in the study were storing inpatient and outpatient physician and other provider encounter text in electronic form during the period of time of the study. The vast majority of medical records for all subjects existed on paper only. Laboratory data was available for 1 subject in electronic form from one institution, and these data were imported into the ILSR study database.

**ILSR (Integrated Life Science Research) database and removal of identifiers.** In order to maintain subject privacy while also facilitating collaborative research, name and date identifiers were removed from the ILSR electronic text using a formal standardized study protocol. For example, the name “Mr. Smith” was replaced with “[name: Mr. A33]”, and “Dr. Jones” was replaced with “[physician: Dr. A]” etc. Location names were similarly coded within the text of each encounter record. The Actual date and time (when time was available) of each record is recorded as a separate field in ILSR, and access to these specific dates was limited to those with a need to know on the study team. Within the text of each record, dates were replaced by date markers in relation to the original date of diagnosis of prostate cancer for each subject. For example, if the patient was diagnosed with prostate cancer in 1995, and the record contains the date “5/1/1998”, this date is recorded as “[date: DY+3]”, or if it says “this past May”, and it is

now July and we are 3 years after the date of the subject's original diagnosis of prostate cancer, "date: DY+3: two months prior to this date]" was used.

**Qualification of Records.** The entire body of each subject's record was searched for names recorded in a name tracking list recorded for each subject, and any matches were checked, coded and removed using methods described above. Upon transfer of the records to the NLP team for this study, a search of the text corpus of each record revealed 19 duplicate records where two paper copies of the same record had been translated into two electronic encounter records in ILSR. These 19 records were removed from the ILSR database prior to NLP analysis.

## **NLP System**

NLP pattern matching and system component interaction is illustrated in Online Appendix Figure 1. The algorithm itself is illustrated in main manuscript figure 1.

Free text terms (vocabulary), elements (subrules such as Pain\_Modifier), and rules (regular expressions) trigger actions. The example in figure 1 shows how the context of a pain term leads to the assignment of a severity level. We use the term *feature* to describe an individual vocabulary phrase, or literal text string, that represents a disease, finding, symptom, or other concept; synonymous features are grouped together into feature lists (for example, SeverePain\_PainModifiers). Features lists can be used within regular expression rules referred to as elements. Elements that can be expected to behave similarly in context, such as pain severity modifiers, are grouped together into element lists. One such element is composed of a feature list followed by a set of "and", "or", and punctuation that defines a list. This element is then used in a rule for matching lists of negated symptoms, such as in the following example:

He denies vomiting, fever, chills, diarrhea, edema and chest pain.

where "denies" negates the five conditions cited following the word "denies".

In the NLP algorithm used, a *rule* defines a pattern composed of feature lists, element lists, and/or literal text strings, and instructs the system to take a specific *action* when that pattern is found in the text. The action is then used to create a data structure to record the information the rule was designed to collect. The action can also modify an existing data structure.

The final NLP algorithm contained 647 rules, 43 elements, 151 feature lists (containing a total of 29,000 feature terms), and 44 actions. Additionally the system contains 157,000 table entries to support preferred term and CUI lookups.

This instance of ClinREAD processes the 4,409 records in the PELICAN corpus in just over 6 minutes, running on an HP Elitebook laptop with a 3.39 Ghz processor and 3 GB of RAM

Across all patient encounters, the NLP algorithm identified

- 6,387 pain mentions (mean 1.45 pain mentions per record)
- 7,023 disease or syndrome mentions
- 497 clinical findings
- 556 injury or poisoning terms
- 5,952 neoplastic process terms
- 5,576 other sign or symptom terms
- 13,827 drug mentions

While the analysis presented here only used the Pain and Drug mentions, the entire set of semantic types and vocabulary was retained in the NLP system both for disambiguation purposes and in preparation for future work.

Semantic type disambiguation of overloaded terms is currently rudimentary, using context in some case, but relying heavily on default assumptions for common terms used in the context of prostate cancer (especially for abbreviations). Future work will further develop our disambiguation algorithms.

We did not have the resources to directly compare the performance of our pain extraction system to that of other NLP concept extraction systems such as MedLEE, or cTAKES (1). Our study required a variation of the concept extraction task described in Uzuner 2010 (2). The concepts in our NLP system are vastly simplified into 'pain' or 'not pain.' We have also added attributes for concepts: severity level (requiring context normalization task), a date (requiring temporal interpretation), and a body location (requiring optional relationship interpretation).

## **UMLS Normalization.**

The UMLS contains a number of overlapping concepts and inconsistencies on how modifiers are handled. For example in the list below, both severity and body location are encoded within certain concepts.

- pain – UMLS CUI C0030193
- crushing pain – UMLS concept ID: C0458259
- chest pain – UMLS concept ID: C0008031
- crushing chest pain – UMLS concept ID: C0232290
- central chest pain – UMLS concept ID: C0423634
- central crushing chest pain – UMLS concept ID: C0458102

Removing redundancy from the vocabulary proved time prohibitive, so, in order to normalize the concepts, a series of lookup tables was built to associate encoded attributes with concepts. This enables us to support not only cases where the concept phrase contains the information (“crushing chest pain”) but also concepts where the severity and body location information is implied (“severe headache”, C0239889, or “painful swallow” C0221150).

### **Date Resolution.**

The NLP algorithm used for the study associates each mention of a finding, disease, syndrome, or neoplastic process with a body location when body location is explicitly mentioned in the text. A date is associated with every description of a valid UMLS concept found in the record. Whenever possible, dates found in the text, such as “last Tuesday” or “10 years ago” are used and resolved to absolute dates based on the date of the clinical encounter. If no internal date is relevant, then the date of the encounter stored in the ILSR database is used.

Internally, the dates are represented as ranges [startdate,enddate]. Dates are recognized in two categories: absolute dates (Oct 2, 2001) or relative dates (“last October”). Absolute dates may be fully specified, or may be incomplete as in “His last incidence of pain was on October 2.” Missing information in an incomplete date, such as the year value, are resolved though a document date (in this case, the date of the encounter). Lookup tables are used to identify start and end values for units larger than a single day, so “October, 2001” becomes the range [10/01/2001, 10/31/2001].

All dates are resolved in the order in which they are found in the text. Relative dates are resolved using the previous date mentioned rather than the date of the document. Relative dates (“last week,” “next month,” “2 summers ago,”) consist of a quantity, a direction, and a unit. Simple date addition and subtraction are used in conjunction with lookup tables to identify the appropriate date range. See references (3, 4) for more detailed information.

The PELICAN cohort consists of 33 men who were followed from diagnosis to death due to metastatic prostate cancer. Using date of death as an endpoint, the NLP system further normalizes the dates of each concept to the number of days before death. Internally, the dates are represented as ranges [startdate,enddate]. The current system converts this to the midpoint in order to come up with a single “Day Before Death” value using a conversion to the modified Julian date format.

TimeML is a markup language for temporal and event expressions ([www.timeml.org](http://www.timeml.org)). TLINK is the TimeML tag used to describe the relationship between an event and a time. TimeML provides for a robust model of temporal events that enables the modeling of many nuanced descriptions in free text for the progression and durations of events.

We did NOT use TimeML in this project. While an implementation based on TimeML would be very interesting, we chose a simpler approach for this discovery effort and timestamped events based on rather straightforward contexts. The success of this approach is reflected in the Logistic Regression correlation of increasing pain as death approached and the correlation of increased pain derived from the free text and the advent of pain relief treatments as found in the structured data.

### **Statistical Analysis Variables**

We first generated a “months before death” variable for each encounter based on the date of the visit and the date of death, taking the minimum value 0 in the month of death, and the maximum value at the month of prostate cancer diagnosis. Observations made prior to the diagnosis of prostate cancer were excluded from the analysis. For each month before death we identified the maximum pain level recorded across all visits (max\_pain) during that month. Similarly, for each month we defined a “max” variable for available serum PSA and body mass index (BMI, measured as mass (kg) / [height (m)]<sup>2</sup>); to capture a possible correlation of pain with weight change, we also generated a variable indicating the percentage of the BMI in each study month, relative to the maximum BMI recorded since diagnosis. Administration of NSAIDs, opioids (any kind), and chemotherapy as detected by NLP extraction were recorded (yes/no) for each month. We similarly created a yes/no variable for receipt of palliative radiation therapy, given either as intravenous strontium 89 or external beam radiation. To remove possible bias created by absence of data from patients who ended their lives in hospice care and from whom medical records would typically not be available during the final 1-12 weeks of life, we removed from regression analysis any months in the last 3 months of life in which there were no pain reports in the database.

**Appendix Table 1: Univariate analysis of Pain and Other Clinical Parameters**

| <b>Variable</b>               | <b>Odds Ratio Point Estimate</b> | <b>95% CI</b> |        | <b>p value</b> |
|-------------------------------|----------------------------------|---------------|--------|----------------|
| Received definitive radiation | <0.001                           | <0.001        | >999   | 0.98           |
| Received palliative radiation | 13.8                             | 8.256         | 22.925 | <.0001         |
| Log PSA value                 | 2.5                              | 2.014         | 3.013  | <.0001         |
| Age at diagnosis              | 1.0                              | 0.996         | 1      | 0.02           |
| African American              | 1.5                              | 0.941         | 2.407  | 0.09           |



|                              |      |        |        |        |
|------------------------------|------|--------|--------|--------|
| Maximum subject BMI recorded | 1.0  | 0.962  | 1.071  | 0.60   |
| Subject BMI <90% of maximum  | 2.8  | 1.898  | 4.001  | <.0001 |
| Chemotherapy administered    | 6.3  | 4.223  | 9.256  | <.0001 |
| NSAID administered           | 4.6  | 3.082  | 6.846  | <.0001 |
| Opioid drug administered     | 25.6 | 16.535 | 39.694 | <.0001 |
| Steroid drug administered    | 3.7  | 2.494  | 5.425  | <.0001 |
| Number outpatient visits     | 1.7  | 1.522  | 1.861  | <.0001 |
| Number inpatient visits      | 7.2  | 4.776  | 10.902 | <.0001 |
| Months left to live          | 0.9  | 0.879  | 0.917  | <.0001 |
| Last Year of Life            | 9.9  | 6.562  | 15.056 | <.0001 |

### Examples of inter-annotator disagreements.

Although inter-annotator agreement was good overall, the instances of disagreement can be instructive concerning the challenges encountered while extracting information about pain status from text of inpatient and outpatient visit records.

In the following examples expert annotator disagreement hinged on whether the mention describes actual, experienced pain or not:

- “[directive:] Assess and manage **pain** .”
- “[Dr. M] called re: above, will call patient to discuss symptoms, adjust **pain** med.”

The disagreement in these cases hinged on the larger context (surrounding phrases) of these pain mentions, which were consistent with them representing actual experienced pain in the patient. However this was deemed by the NLP team as an incorrect use of outside text by one expert annotator. The annotators then agreed that the specific pain mention text shown does *not* by itself constitute a mention of experienced pain and were so marked. Pain mentions in the same inpatient encounter records contain other more definitive mentions of pain that were annotated similarly by the expert judges, and by the NLP algorithm used.

In the next examples, there was initial disagreement between the annotators on whether there was “no pain” or “controlled pain”. After discussion, the decision was that the first two examples are instances of “controlled pain”, while the third example was declared an instance of ‘some pain’:

- “Both he and his wife are encouraged that finally they feel like his **pain** is coming under control.”
- “Mr. [Mr. A10] is receiving his radiation therapy and his **pain** control is substantially improved.”

- “It is quite likely that the patient's greatest sources of **pain** were treated with his present therapy and the other areas became noticeably more significant.”

Additional examples of expert annotator agreement and disagreement can be found in appendix table 6.

Following the measurement of inter-annotator agreement, the annotators discussed each annotation disagreement and came to consensus on a “gold standard” reading for each point of disagreement. Some of the annotator disagreements were due to the confusing nature of statements written in the clinical record or simply the result of annotator error.

We discovered that several errors arose from a lack of specificity in our data model definition. First, our model only allowed for the association of a single body location for each mention of pain. Unfortunately, we did not have the resources to modify the model and allow multiple locations.

Second, the category of “controlled pain” was problematic. After much discussion, we decided that controlled pain would be used for cases where there was successful treatment of pain. As mentioned in the Limitations section, we intend to change the model to allow both a severity and a separate pain treatment status to indicate if the pain was successfully being treated or not; see the Limitations section of the paper text for further discussion.

## Appendix Table 2. Pain Severity Contextual Rules

|                                                                                               |                                                                                                                 |
|-----------------------------------------------------------------------------------------------|-----------------------------------------------------------------------------------------------------------------|
| { [PainSeverityModifier]<br>[PainTerm]<br>}                                                   | { [PainTerm]<br>[PainSeverityComplement_Elem]<br>}                                                              |
| { [PainSeverityModifier]<br>[BodyLocationTerm]<br>[PainTerm]<br>}                             | { [DefiniteDeterminer]<br>[PainTerm]<br>[ToBe]<br>[PainSeverityComplement_Elem]<br>}                            |
| { [PainTerm]<br>[ToBe]<br>[Adv]?<br>[PainSeverityComplement_Elem]<br>}                        | { [PainSeverityModifier]<br>[Adj]{0,3}<br>[PainTerm]<br>}                                                       |
| { [PainTerm]<br>. {0,15}<br>[PainSeverityComplement_Elem]<br>"OUT"<br>"OF"<br>"10" "TEN"<br>} | { [PainSeverityModifier]<br>[ListItemSeverity_Elem]{0,10}<br>[ListItemPainRecord_Elem]{0,10}<br>[PainTerm]<br>} |
|                                                                                               | { [PainTerm]<br>[RelProNoun]<br>}                                                                               |

[ToBe]  
[Adv]?  
[PainSeverityComplement\_Elem]  
}

{ "BLASTIC"  
[PainTerm]  
[BodyLocationTerm]  
}

{ "NOT"  
[Prep]  
[PainTerm]  
}

{ [PainTerm]  
[Prep]  
[Det]  
.?  
[BodyLocationTerm]  
[ToBe]  
[Adv]?  
[PainSeverityComplement\_Elem]  
}

{ [PainTerm]  
[ToBe]  
[Adv]?  
[PainSeverityComplement\_Elem]  
}

{ [PainTerm]  
[ToBe]  
[Adv]?  
[PainSeverityComplement\_Elem]  
}

{ [PainTerm]  
[ToBe]  
[PainSeverityComplement\_Elem]  
}

{ [PainTerm]  
[ToBe]  
"UNDER"  
[Adj]{0,2}  
[PainSeverityComplement\_Elem]  
}

{ [PainSeverityModifier]  
[BodyLocationTerm]  
[CoordConj]  
[PainTerm]  
}

{ "OBTAINED"

[Adv]?  
"IMMEDIATE"  
[PainSeverityModifier]  
[Det]  
[PainTerm]  
}

{ [PainTerm]  
[PainSeverityComplement\_Elem]  
}

{ [PainTerm]  
[ToBe]  
[PainSeverityComplement\_Elem]  
[Prep]  
[Det]  
[BodyLocationTerm]  
}

{ DOUBLE\_QUOTE  
[PainSeverityModifier]  
DOUBLE\_QUOTE  
[PainTerm]  
}

{ [PainSeverityModifier]  
[NounPreMod]?  
[Noun]  
[CoordConj]  
[PainTerm]  
}

{ [PainTerm]  
[PainTerm]  
[PainSeverityComplement\_Elem]  
}

{ [PainTerm]  
[ParenPuncRight]  
[Adv]  
[ParenPuncRight]  
[VerbAux]  
[PainSeverityComplement\_Elem]  
}

{  
[PainSeverityModifier]  
"ASSOCIATED"  
[PainTerm]  
}

{ [PatientReference]  
[PainSeverityModifier]  
"SYMPTOMS"  
"SUCH"|"LIKE"  
"AS"?

|                               |                               |
|-------------------------------|-------------------------------|
| [PainTerm]                    | "OF"                          |
| }                             | "0" "ZERO"                    |
| { [PatientReference]          | "TO" "-"                      |
| [PainSeverityModifier]        | "10" "TEN"                    |
| "SYMPTOMS"                    | }                             |
| "SUCH" "LIKE"                 | { [PainTerm]                  |
| "AS"?                         | .{0,7}                        |
| [PainTerm]                    | [PainSeverityComplement_Elem] |
| [CoordConj]                   | "/"                           |
| [PainTerm]                    | "10" "TEN"                    |
| }                             | }                             |
| { [PainSeverityModifier]      | { .{0,7}                      |
| [BodyLocationTerm]            | [PainSeverityComplement_Elem] |
| [CoordConj]                   | "OUT"                         |
| [BodyLocationTerm]            | "OF"                          |
| [PainTerm]                    | "10" "TEN"                    |
| }                             | [PainTerm]                    |
| { [PainSeverityModifier]      | }                             |
| [PainTerm]                    | { "HAS"                       |
| [CoordConj]                   | "HAD"                         |
| ..?                           | ..?                           |
| [PainTerm]                    | "THERAPY"                     |
| }                             | "FOR"                         |
| { [PainSeverityModifier]      | [PainTerm]                    |
| [PainTerm]                    | }                             |
| #COMMA?                       | { "IS"                        |
| [PainTerm]                    | "REQUIRING"                   |
| [CoordConj]                   | .{0,7}                        |
| [PainTerm]                    | [DrugTerm]                    |
| }                             | "FOR"                         |
| { [PainSeverityModifier]      | "CONTROL"                     |
| DOUBLE_QUOTE?                 | .{0,3}                        |
| ..{0,2}                       | [PainTerm]                    |
| [PainTerm]                    | }                             |
| }                             | { [DrugTerm]                  |
| { [PainSeverityModifier]      | ..{0,2}                       |
| DOUBLE_QUOTE                  | [MEASURE]                     |
| [PainTerm]                    | ..{0,3}                       |
| [CoordConj]                   | [DosageFrequency_Elem]        |
| [PainTerm]                    | ..{0,3}                       |
| #COMMA?                       | #COMMA                        |
| DOUBLE_QUOTE                  | [PainTerm]                    |
| }                             | }                             |
| { [PainTerm]                  | { [DrugTerm]                  |
| ..{0,15}                      | ..{0,3}                       |
| [PainSeverityComplement_Elem] | [DosageFrequency_Elem]        |
| "ON"                          | ..{0,2}                       |
| [Det]                         | [MEASURE]                     |
| "SCALE"                       | ..{0,3}                       |
|                               | #COMMA                        |

|                                   |               |
|-----------------------------------|---------------|
| [PainTerm]                        |               |
| }                                 | { [PainTerm]  |
| { #DIGITS                         | [ToHave]      |
| "H"                               | "REQUIRED"    |
| #PUNC?                            | .{0,30}       |
| "PM"?                             | "LARGE"       |
| #PUNC                             | "DOSE"        |
| [PainTerm]                        | "OF"          |
| }                                 | "NARCOTIC"    |
|                                   | }             |
| { [PainTerm]                      | { "CONTINUES" |
| [RelProNoun]                      | "ON"          |
| [PossVerbGroup]                   | [DrugTerm]    |
| [Prep]                            | .{0,5}        |
|                                   | [DosageUnit]? |
| [ControlledPain_PainComplement_Ft | .{0,5}        |
| r]                                | [PainTerm]    |
| }                                 | }             |

### Appendix Table 3. UMLS 2010AB 35 Level 0 Source Vocabularies used for NLP. UMLS Source Vocabularies – Category 0

**Abbreviations: RSAB (Root Source Abbrev), VSAB (Versioned Source Abbrev), NOS (Number of Strings)**

1. **RSAB: AIR, VSAB: AIR93** - AI/RHEUM. Bethesda, (MD): National Library of Medicine, Lister Hill Center, 1993. NOS: 685
2. **RSAB: AOD, VSAB: AOD2000** - Alcohol and Other Drug Thesaurus: A Guide to Concepts and Terminology in Substance Abuse and Addiction. 3rd. ed. [4 Volumes.] Bethesda, MD: National Institute on Alcohol Abuse and Alcoholism (NIAAA) and Center for Substance Abuse Prevention (CSAP), 20 NOS: 20,685
3. **RSAB: AOT, VSAB: AOT2003** - Authorized Osteopathic Thesaurus. Educational Council of Osteopathic Principles of the American Association of Colleges of Osteopathic Medicine: Chevy Chase MD, 2004; NOS: 471
4. **RSAB: CCS, VSAB: CCS2005** - Clinical Classifications Software (CCS). Agency for Healthcare Research and Quality (AHRQ), Rockville, MD. Release Date: April 2005. NOS: 1,617
5. **RSAB: COSTAR, VSAB: COSTAR\_89-95** - Computer-Stored Ambulatory Records (COSTAR). Boston (MA): Massachusetts General Hospital, 1989-1995. NOS: 3,461
6. **RSAB: DXP, VSAB: DXP94** - DXplain (An expert diagnosis program). Boston (MA): Massachusetts General Hospital, 1994. NOS: 10,113
7. **RSAB: GO, VSAB: GO2009\_04\_01** - The Gene Ontology; The Gene Ontology Consortium; April 1, 2009;ENG NOS: 90,261
8. **RSAB: HCPCS, VSAB: HCPCS2010** (updated) - Healthcare Common Procedure Coding System (HCPCS);Baltimore, MD;Centers for Medicare & Medicaid Services;2010;ENG
9. **RSAB: HL7V3.0, VSAB: HL7V3.0\_2006\_05** - Health Level Seven Vocabulary (HL7). Ann Arbor (MI): Health Level Seven, 1998-2006. Contact: Mark McDougall, Executive Director, Health Level Seven; 3300 Washtenaw Avenue, Suite 227, Ann Arbor, MI 48104-4250; Phone: (734)677-7777; Fax: (734)677-6622; Email: [HQ@HL7.ORG](mailto:HQ@HL7.ORG) ; Web site: [www.HL7.ORG](http://www.HL7.ORG). NOS: 8,062

10. **RSAB: HUGO, VSAB: HUGO2009\_04** - Eyre TA, Ducluzeau F, Sneddon TP, Povey S, Bruford EA and Lush MJ;HGNC Database;The HUGO Gene Nomenclature Database;European Bioinformatics Institute Wellcome Trust Genome Campus;United Kingdom;ENG NOS: 95,285
11. **RSAB: ICD9CM, VSAB: ICD9CM\_2010** - U.S. Department of Health and Human Services, Centers for Medicare & Medicaid Services;ICD-9-CM [computer file]: International Classification of Diseases, Ninth Revision, Clinical Modification; October 1, 2009;Baltimore, MD NOS: 40,186 (HIPAA and CHI standards)
12. **RSAB: LNC, VSAB: LNC229** (updated) - The Regenstrief Institute;Logical Observation Identifier Names and Codes (LOINC);Version 2.29;Dec 30, 2009;Indianapolis, IN;ENG NOS: 318,549 (CHI standard)
13. **RSAB: MEDLINEPLUS, VSAB: MEDLINEPLUS\_20080614** - MedlinePlus Health Topics;National Library of Medicine;June 14, 2008;Bethesda, MD;ENG NOS: 2,683
14. **RSAB: MSH, VSAB: MSH2010\_2010\_02\_22** (updated) - Medical Subject Headings (MeSH);National Library of Medicine;2010;Bethesda, MD;ENG NOS: 717,465
15. **RSAB: MTH, VSAB: MTH** - UMLS Metathesaurus. Bethesda, MD: National Library of Medicine.
16. **RSAB: MTHCH, VSAB: MTHCH2010** (updated) - Metathesaurus Hierarchical CPT Terms; National Library of Medicine;2010;Bethesda, MD, NOS: 1,033
17. **RSAB: MTHFDA, VSAB: MTHFDA\_2010\_02\_01** (updated) - Metathesaurus Forms of FDA National Drug Code Directory;2010\_02\_01;Bethesda, MD;National Library of Medicine;ENG NOS: 78,392
18. **RSAB: MTHHH, VSAB: MTHHH2010** (updated) - Metathesaurus Hierarchical HCPCS Terms;Bethesda, MD;National Library of Medicine;2010
19. **RSAB: MTHHL7V2.5, VSAB: MTHHL7V2.5\_2003\_08** - HL7 Vocabulary Version 2.5, 7-bit equivalents created by the National Library of Medicine. Bethesda (MD): August 30, 2003 NOS: 2
20. **RSAB: MTHICD9, VSAB: MTHICD9\_2010** - Metathesaurus additional entry terms for ICD-9-CM [computer file]: International Classification of Diseases, Ninth Revision, Clinical Modification;National Library of Medicine;October 1, 2009;Bethesda, MD NOS: 19,852
21. **RSAB: MTHMST, VSAB: MTHMST2001** - Metathesaurus Version of Minimal Standard Terminology Digestive Endoscopy. Bethesda, MD: National Library of Medicine, 2001. NOS: 1,945
22. **RSAB: MTHSPL, VSAB: MTHSPL\_2010\_02\_22** (updated) - Metathesaurus Forms of the FDA Structured Product Labels;2010\_02\_22;Bethesda, MD;National Library of Medicine NOS: 26,375
23. **RSAB: NCBI, VSAB: NCBI2009\_04\_13** - U.S. Department of Health and Human Services; NCBI Taxonomy;National Institutes of Health, National Library of Medicine, National Center for Biotechnology Information;April 13, 2009;Bethesda, MD NOS: 557,958
24. **RSAB: NCI, VSAB: NCI2009\_04D** - National Cancer Institute, National Institutes of Health;Sherri de Coronado;NCI Thesaurus;National Cancer Institute;OWL version, April 2009;Bethesda, MD NOS: 190,112 (HIPAA standard)
25. **RSAB: OMIM, VSAB: OMIM2009\_05\_01** - Dr. Ada Hamosh;National Center for Biotechnology Information;Online Mendelian Inheritance in Man;McKusick-Nathans Institute for Genetic Medicine, Johns Hopkins University;May 1, 2009;Bethesda, MD; NOS: 130,996
26. **RSAB: PDQ, VSAB: PDQ2007\_02** - PDQ. Bethesda (MD): National Cancer Institute, February 2007. NOS: 26,448
27. **RSAB: PNDS, VSAB: PNDS2002** - Perioperative nursing data set : the perioperative nursing vocabulary, 2nd Ed. edited by Suzanne C. Beyea. / AORN; Denver, Colo. : AORN, 2002 NOS: 268
28. **RSAB: QMR, VSAB: QMR96** - Quick Medical Reference (QMR). San Bruno (CA): First DataBank, 1997. NOS: 943
29. **RSAB: RAM, VSAB: RAM99** - QMR clinically related terms from Randolph A. Miller, 1999. NOS: 258
30. **RSAB: RXNORM, VSAB: RXNORM\_09AB\_100301F** (updated) - RxNorm;META2009AB Full Update 2010\_03\_01;Bethesda, MD;National Library of Medicine
31. **RSAB: SNOMEDCT, VSAB: SNOMEDCT\_2010\_01\_31** (updated) - International Health Terminology Standards Development Organization;SNOMED Clinical Terms;January 31,

- 2010;Chicago, IL;College of American Pathologists, 2010;<http://www.ihtsdo.org>;ENG NOS: 1,166,529 (CHI standard)
32. **RSAB: SPN, VSAB: SPN2003** - Standard Product Nomenclature (SPN). Rockville, (MD); U.S. Food and Drug Administration, 2003 NOS: 4,881
  33. **RSAB: USPMG, VSAB: USPMG\_2004** - United States Pharmacopeia (USP). Medicare Prescription Drug Benefit Model Guidelines: Drug Categories and Classes in Part D, 2004. NOS: 1,789 <http://www.usp.org/pdf/EN/mmg/comprehensiveDrugListing2004-12-31.pdf>
  34. **RSAB: UWDA, VSAB: UWDA173** - University of Washington Digital Anatomist, (UWDA). Seattle (WA): University of Washinton, Version 1.7.3, March, 2003. Jose Mejino, M.D.; NOS: 92,913
  35. **RSAB: VANDF, VSAB: VANDF\_2010\_01\_25** (updated) - Veterans Health Administration National Drug File;January 25, 2010;Washington, DC;U.S. Department of Veterans Affairs;ENG NOS: 46,403

#### Appendix Table 4. UMLS Semantic Types Included in Vocabulary

|                                       |
|---------------------------------------|
| FINDING                               |
| ANTIBIOTIC                            |
| SIGN OR SYMPTOM                       |
| PHARMACOLOGIC SUBSTANCE               |
| BODY LOCATION OR REGION               |
| BODY PART ORGAN OR ORGAN COMPONENT    |
| BODY SPACE OR JUNCTION                |
| LABORATORY OR TEST RESULT             |
| HEALTH CARE ACTIVITY                  |
| LABORATORY PROCEDURE                  |
| DIAGNOSTIC PROCEDURE                  |
| THERAPEUTIC OR PREVENTATIVE PROCEDURE |
| DISEASE OR SYNDROME                   |
| NEOPLASTIC PROCESS                    |

|                                                       |
|-------------------------------------------------------|
| <p>INJURY OR POISONING</p> <p>PATHOLOGIC FUNCTION</p> |
|-------------------------------------------------------|

**Appendix Table 5. Sign and Symptom Strings indicating Pain**

The following are the UMLS concepts that we defined to indicate pain. All pain is initially assigned severity level 1, “some pain.” Context is used via the severity rules shown in Table 2 of this appendix for the majority of cases. Appendix Table 11 lists the subset of concepts we used where the severity was contained within the concept itself.

Note: the term “tenderness,” found frequently in the records, was ambiguous, and the subject matter experts disagreed about whether “tenderness” should be considered as synonymous with “pain.” Medically, tenderness is evoked pain, not present at rest, but the term appears to be used by some patients—and some medical professionals—as a synonym for pain. In the current study, tenderness was treated as pain (severity category 1).

|                                     |                                                              |                                         |
|-------------------------------------|--------------------------------------------------------------|-----------------------------------------|
| <b>A GREAT DEAL OF PAIN</b>         | <b>ABDOMEN PAIN</b>                                          | <b>ACHE</b>                             |
| <b>ABDMNAL PAIN<br/>EPIGASTRIC</b>  | <b>ABDOMINAL PAIN</b>                                        | <b>ACHE IN JOINT</b>                    |
| <b>ABDMNAL PAIN LFT UP<br/>QUAD</b> | <b>ABDOMINAL PAIN<br/>CAUSE UNKNOWN</b>                      | <b>ACHES</b>                            |
| <b>ABDMNAL PAIN LT LWR<br/>QUAD</b> | <b>ABDOMINAL PAIN OF<br/>SUSPECTED<br/>PANCREATIC ORIGIN</b> | <b>ACHES PAINS IN LEGS</b>              |
| <b>ABDMNAL PAIN RT LWR<br/>QUAD</b> | <b>ABDOMINAL PAINS</b>                                       | <b>ACHING</b>                           |
| <b>ABDMNAL PAIN RT UPR<br/>QUAD</b> | <b>ABDOMINAL WIND PAIN</b>                                   | <b>ACHING MUSCLES</b>                   |
| <b>ABDMNAL PAIN<br/>UNSPCF SITE</b> | <b>ABSCENCE OF PAIN</b>                                      | <b>ACHING PAIN</b>                      |
|                                     | <b>ABSENCE OF PAIN</b>                                       | <b>ACROMIOCLAVICULAR<br/>JOINT PAIN</b> |
|                                     |                                                              | <b>ACUTE ABDOMINAL<br/>PAIN</b>         |



ACUTE ABDOMINAL  
PAIN SYNDROME

ACUTE BACK PAIN  
LUMBAR

ACUTE BACK PAIN  
THORACIC

ACUTE BACK PAIN  
UNSPECIFIED

ACUTE BACK SCIATICA

ACUTE CHEST PAIN

ACUTE ONSET PAIN

ACUTE PAIN

ACUTE PELVIC PAIN

AKP ANTERIOR KNEE  
PAIN

ANAL STUMP PAIN

ANGINA

ANGINA PECTORIS

ANKLE JOINT PAIN

ANKLE PAIN

ANORECTAL PAIN

ANTERIOR CERVICAL  
PAIN

ANTERIOR CERVICAL  
PAINS

ANTERIOR CHEST  
WALL PAIN

ANTERIOR NECK PAIN

AP ABDOMINAL PAIN

ARTHRALGIA

ARTHRALGIA HIP

ARTHRALGIA KNEE

ARTHRALGIA OF  
DISTAL RADIOULNAR  
JOINT

ARTHRALGIA OF  
ELBOW

ARTHRALGIA OF HIP

ARTHRALGIA OF  
INTERPHALANGEAL  
JOINT OF TOE

ARTHRALGIA OF KNEE

ARTHRALGIA OF  
LESSER  
METATARSOPHALANGE  
AL JOINT

ARTHRALGIA OF  
METACARPOPHALANG  
EAL JOINT

ARTHRALGIA OF  
SACROILIAC JOINT

ARTHRALGIA OF  
SHOULDER

ARTHRALGIA OF  
STERNOCLAVICULAR  
JOINT

ARTHRALGIA OF  
SUBTALAR JOINT

ARTHRALGIA OF  
TALONAVICULAR JOINT

ARTHRALGIA OF  
TEMPOROMANDIBULAR  
JOINT

ARTHRALGIA OF THE  
HAND

ARTHRALGIA OF THE  
SHOULDER REGION

ARTHRALGIA OF THE  
SHOULDER REGION  
SHOULDER JOINT

ARTHRALGIA OF  
TIBIOFIBULAR JOINT

ARTHRALGIA TMJ

ARTHRALGIAS

ARTHRALGIAS KNEES

ARTHRODYNIA

ARTICULAR PAIN

ATYPICAL FACE PAIN

AUTONOMIC PAIN

AXILLARY PAIN

BACK ACHE

BACK ACHES

BACK PAIN

BACK PAIN FINDING

BACKACHE

BACKACHE DISORDER

BACKACHE FINDING

BACKACHE SYMPTOM

BACKACHE  
UNSPECIFIED

BACKACHES

BACKPAIN

|                             |                           |                                    |
|-----------------------------|---------------------------|------------------------------------|
| BELLYACHE                   | CEPHALODYNIA              | CHRONIC NONSPECIFIC ABDOMINAL PAIN |
| BLADDER PAIN                | CEPHALODYNIAS             | CHRONIC PELVIC PAIN                |
| BONE PAIN                   | CERVICAL PAIN             | CLAUDICATION                       |
| BONEY PAIN                  | CERVICAL PAINS            | CLAVICLE PAIN                      |
| BONY PAIN                   | CERVICALGIA               | COCCYALGIA                         |
| BREAK THROUGH PAIN          | CERVICALGIA PAIN IN NECK  | COCCYDYNIA                         |
| BREAKTHROUGH PAIN           | CERVICALGIAS              | COCCYGALGIA                        |
| BURNING                     | CERVICODYNIA              | COCCYGEAL PAIN                     |
| BURNING PAIN                | CERVICODYNIAS             | COCCYGODYNIA                       |
| BURSAL PAIN                 | CHEEK PAIN                | COCCYODYNIA                        |
| BUTTOCK PAIN                | CHEST PAIN                | COCCYX PAIN                        |
| C O ACHE OR PAIN            | CHEST PAIN AT REST        | COCCYXDYNIA                        |
| CALF PAIN                   | CHEST PAIN NEC IN MDR     | CONSIDERABLE PAIN                  |
| CANCER ASSOCIATED PAIN      | CHEST PAIN ON EXERTION    | COSTOVERTEBRAL ANGLE TENDERNESS    |
| CARDIAC CHEST PAIN          | CHEST PAINS               | COXALGIA                           |
| CARDIAC PAIN                | CHEST PRESSURE SENSATION  | CP                                 |
| CENTRAL ABDOMINAL PAIN      | CHEST TIGHTNESS SENSATION | CRAMP                              |
| CENTRAL CHEST PAIN          | CHEST WALL PAIN           | CRAMPS                             |
| CENTRAL CRUSHING CHEST PAIN | CHRONIC ABDOMINAL PAIN    | CRANIAL PAIN                       |
| CEPHALALGIA                 | CHRONIC BACK PAIN         | CRANIAL PAINS                      |
| CEPHALALGIA HEADACHE        | CHRONIC CANCER PAIN       | CRANIOFACIAL PAIN                  |
| CEPHALALGIAS                | CHRONIC INTRACTABLE PAIN  | CRUSHING CHEST PAIN                |
| CEPHALGIA                   |                           | CRUSHING PAIN                      |
| CEPHALGIAS                  |                           | CVA TENDERNESS                     |
|                             |                           | DEEP PAIN                          |

|                             |                              |                                |
|-----------------------------|------------------------------|--------------------------------|
| DELTOID PAIN                | EPIGASTRIC<br>ABDOMINAL PAIN | GASTROINTESTINAL<br>PAIN       |
| DENIED ANY PAIN             |                              |                                |
| DENIED PAIN                 | ESOPHAGEAL CHEST<br>PAIN     | GENERAL ACHES AND<br>PAINS     |
| DENIES ANY PAIN             | ESOPHAGEAL PAIN              | GENERALISED ACHES<br>AND PAINS |
| DENIES PAIN                 | ESOPHAGODYNIA                |                                |
| DENTAL ALVEOLAR<br>PAIN     | EXCRUCIATING PAIN            | GENERALISED BODY<br>ACHES      |
| DENY ANY PAIN               | EXQUISITE PAIN               | GENERALISED PAIN               |
| DENY PAIN                   | EXTERNAL EAR PAIN            | GENERALIZED ACHES<br>AND PAINS |
| DIAPHRAGMATIC PAIN          | EXTREMITY PAIN               |                                |
| DIFFUSE ABDOMINAL<br>PAIN   | EYE MOVEMENT PAIN            | GENERALIZED BODY<br>ACHES      |
|                             | EYE PAIN                     | GENERALIZED BODY<br>PAINS      |
| DIFFUSE PAIN                | EYELID PAIN                  |                                |
| DIP JOINT PAIN              | FACE ACHE                    | GENITAL PAIN                   |
| DISCOMFORT                  | FACE PAIN                    | GIRDLE PAIN                    |
| DOLOR                       | FAIRLY PAINFUL               | GLANS PENIS PAIN               |
| DORSALGIA                   | FINGER PAIN                  | GLOSSALGIA                     |
| DORSODYNIA                  | FINGERNAIL PAIN              | GLOSSALGIAS                    |
| DULL PAIN                   | FLANK PAIN                   | GLOSSODYNIA                    |
| DYSURIA                     | FOOT JOINT PAIN              | GLOSSODYNIAS                   |
| EAR PAIN                    | FOOT PAIN                    | GONADAL PAIN                   |
| EARACHE                     | FOOT PAIN TOE                | GONALGIA                       |
| EARACHES                    | FOREARM PAIN                 | GREAT TOE MOVEMENT<br>PAIN     |
| ELBOW PAIN                  | FREQUENT<br>HEADACHES        | GREAT TOE PAIN                 |
| ELBOW<br>PERIARTICULAR PAIN | FRONTAL HEADACHE             | HA HEADACHE                    |
| EPIDIDYMAL PAIN             | FRONTAL SINUS PAIN           | HAND JOINT PAIN                |
|                             | GAS PAIN                     | HEAD ACHE                      |

|                                 |                              |                                      |
|---------------------------------|------------------------------|--------------------------------------|
| HEAD PAIN                       | INTERMITTENT PAIN            | KNEE ARTHRALGIA                      |
| HEAD PAIN CEPHALGIA             | INTERPHALANGEAL JOINT PAIN   | KNEE JOINT PAIN                      |
| HEAD PAINS                      |                              | KNEE PAIN                            |
| HEADACHE                        | INTRACTABLE BREAST PAIN      | KNIFELIKE PAIN                       |
| HEADACHES                       | INTRACTABLE PAIN             | LACRIMAL GLAND PAIN                  |
| HEEL PAIN                       | INTRACTABLE PAINS            | LANCINATING PAINS                    |
| HEPATIC PAIN                    | INTRAOPERATIVE PAIN          | LARYNGEAL PAIN                       |
| HIP ARTHRALGIA                  | IRRADIATING PAIN             | LBP                                  |
| HIP JOINT PAIN                  | ISCHAEMIC CHEST PAIN         | LBP LOW BACK PAIN                    |
| HIP PAIN                        | ISCHEMIC CHEST PAIN          | LEFT FLANK PAIN                      |
| HOPSCOTCH PAIN                  | JOINT PAIN                   | LEFT HIP PAIN                        |
| HOT PAIN                        | JOINT PAIN ACHE              | LEFT ILIAC FOSSA PAIN                |
| HYPOGASTRIC PAIN                | JOINT PAIN ACROMIOCLAVICULAR | LEFT KNEE JOINT PAIN                 |
| ILIAC FOSSA PAIN                | JOINT PAIN ANKLE             | LEFT KNEE PAIN                       |
| INCISIONAL PAIN                 | JOINT PAIN ARTHRALGIA        | LEFT LOWER QUADRANT ABDOMINAL PAIN   |
| INFLAMMATORY PAIN               | JOINT PAIN FOREARM           | LEFT LOWER QUADRANT PAIN             |
| INGUINAL LYMPH NODE PAIN        | JOINT PAIN HAND              | LEFT PREAURICULAR PAIN               |
| INGUINAL PAIN                   | JOINT PAIN JT NEC            | LEFT SIDE "," WITH PREAURICULAR PAIN |
| INGUINODYNIA                    | JOINT PAIN L LEG             | LEFT SIDE WITH PREAURICULAR PAIN     |
| INSTEP PAIN                     | JOINT PAIN PELVIS            | LEFT SIDED ABDOMINAL PAIN            |
| INTERMITTEN PAIN                | JOINT PAIN SHLDER            | LEFT SIDED CHEST PAIN                |
| INTERMITTENT ABDOMINAL PAIN     | JOINT PAIN UNSPEC            | PAIN                                 |
| INTERMITTENT HEADACHE           | JOINT PAIN UP ARM            |                                      |
| INTERMITTENT LLQ ABDOMINAL PAIN | JOINT PAINS                  |                                      |
|                                 | KIDNEY PAIN                  |                                      |

LEFT SUBSCAPULAR  
PAIN

LEFT UPPER  
EXTREMITY PAIN

LEFT UPPER  
QUADRANT  
ABDOMINAL PAIN

LEG PAIN

LIF LEFT ILIAC FOSSA  
PAIN

LIGHTNING PAIN

LIMB PAIN

LIMB STUMP PAIN

LITTLE PAIN

LLQ ABDOMINAL PAIN

LOCALISED  
ABDOMINAL PAIN

LOCALISED PAIN

LOIN PAIN

LOW BACK ACHE

LOW BACK ACHES

LOW BACK PAIN

LOW BACK PAINS

LOW BACK SYNDROME

LOW BACKACHE

LOW BACKACHES

LOW LUMBAR PAIN

LOWER BACK PAIN

LOWER EXTREMITY  
PAIN

LOWER LIMB PAIN

LOWER RIBS PAIN

LOWER THIGH PAIN

LUMBAGO

LUMBAGO AMBIGUOUS

LUMBALGIA

LUMBAR PAIN

LUMBO SACRAL PAIN

LUMBOSACRAL NERVE  
ROOT PAIN

LUQ ABDOMINAL PAIN

LUQ RUQ ABDOMINAL  
PAIN

MALE PERINEAL PAIN

MALIGNANT BONE PAIN

MANDIBULAR PAIN

MASTALGIA NIPPLE  
PAIN

MASTOID PAIN

MAXILLARY PAIN

MAXILLARY SINUS PAIN

MEDIAN NERVE PAIN

MERALGIA

METATARSALGIA

METATARSOPHALANGE  
AL JOINT PAIN

MIDABDOMINAL  
CRAMPY PAIN

MIGRATORY JOINT  
PAIN

MIGRATORY PAIN

MIGRATORY PAINS

MILD PAIN

MINIMAL PAIN

MINOR PAIN

MODERATE PAIN

MUSCLE "J"  
TENDERNESS

MUSCLE ACHE

MUSCLE ACHES

MUSCLE CRAMPS

MUSCLE DISCOMFORT

MUSCLE PAIN

MUSCLE SORENESS

MUSCLE TENDERNESS

MUSCLE TENSION PAIN

MUSCLE WEAKNESS

MUSCULAR PAIN

MUSCULOSKELETAL  
CHEST PAIN

MYALGIA

MYALGIAS

MYODYNIA

MYOFACIAL PAIN

|                            |                                       |                                 |
|----------------------------|---------------------------------------|---------------------------------|
| MYONEURALGIA               | NONSPECIFIC ABDOMINAL PAIN            | PAIN DUE TO MALIGNANCY          |
| MYOSALGIA                  | NONSPECIFIC CHEST PAIN                | PAIN FINDING                    |
| NASAL SINUS PAIN           | NONSPECIFIC PAIN IN THE LUMBAR REGION | PAIN FREE                       |
| NECK ACHE                  | NONSPECIFIC PAIN IN THE NECK REGION   | PAIN IN BACK                    |
| NECK ACHES                 | NOT PAINFUL                           | PAIN IN BUTTOCK                 |
| NECK PAIN                  | NOTALGIA                              | PAIN IN CERVICAL SPINE          |
| NECKACHE                   | NUCHAL PAIN                           | PAIN IN CHEST                   |
| NECKACHES                  | OCCASIONAL PAIN                       | PAIN IN EAR                     |
| NERVE PAIN                 | OCULAR PAIN                           | PAIN IN ESOPHAGUS               |
| NERVE ROOT PAIN            | ODYNOPHAGIA                           | PAIN IN EXTREMITY               |
| NEURALGIA                  | OESOPHAGEAL PAIN                      | PAIN IN FACE                    |
| NEURALGIAS                 | OESOPHAGODYNIA                        | PAIN IN FEMUR                   |
| NEURALGIC FACIAL PAIN      | ORCHIALGIA                            | PAIN IN JOINT                   |
| NEUROGENIC PAIN            | ORCHIDALGIA                           | PAIN IN JOINT ARTHRALGIA        |
| NEUROLOGICAL PAIN          | ORCHIDODYNIA                          | PAIN IN LEFT ARM                |
| NEUROPATHIC PAIN           | OSTEODYNIA                            | PAIN IN LEFT LEG                |
| NO C O PAIN                | OTALGIA                               | PAIN IN LEG                     |
| NO PAIN                    | OTOGENIC OTALGIA                      | PAIN IN LEG ACHING LEG SYNDROME |
| NO PAIN OR DISCOMFORT      | OUT OF PAIN                           | PAIN IN LUMBAR SPINE            |
| NON CARDIAC CHEST PAIN     | PAIN                                  | PAIN IN MALE GENITALIA          |
| NON COLICKY ABDOMINAL PAIN | PAIN AROUND EYE                       | PAIN IN MALE PERINEUM           |
| NON SPECIFIC BACK PAIN     | PAIN AROUND EYE                       | PAIN IN NECK                    |
| NON SPECIFIC JOINT PAIN    | PAIN BETWEEN SHOULDER BLADES          |                                 |

|                                        |                                        |                                                    |
|----------------------------------------|----------------------------------------|----------------------------------------------------|
| <b>PAIN IN NECK<br/>CERVICAL SPINE</b> | <b>PAIN OF SKIN</b>                    | <b>PERSISTENT PAIN</b>                             |
| <b>PAIN IN PELVIS</b>                  | <b>PAIN OF TESTES</b>                  | <b>PERSISTENT<br/>TESTICULAR PAIN</b>              |
| <b>PAIN IN PENIS</b>                   | <b>PAIN PELVIC MALE</b>                | <b>PHARYNGEAL PAIN</b>                             |
| <b>PAIN IN RECTUM</b>                  | <b>PAINFUL</b>                         | <b>PHARYNGOLARYNGEA<br/>L PAIN</b>                 |
| <b>PAIN IN RIGHT ARM</b>               | <b>PAINFUL JOINT</b>                   | <b>PLANTAR HEEL PAIN</b>                           |
| <b>PAIN IN RIGHT LEG</b>               | <b>PAINFUL JOINTS</b>                  | <b>PLEURAL PAIN</b>                                |
| <b>PAIN IN SCAPULA</b>                 | <b>PAINFUL MOUTH</b>                   | <b>PLEURITIC CHEST PAIN</b>                        |
| <b>PAIN IN SCROTUM</b>                 | <b>PAINFUL NECK</b>                    | <b>PLEURITIC PAIN</b>                              |
| <b>PAIN IN SHOULDER</b>                | <b>PAINFUL TONGUE</b>                  | <b>PLEUROPERICARDIAL<br/>CHEST PAIN</b>            |
| <b>PAIN IN SINUSES</b>                 | <b>PAINS</b>                           | <b>POINT TENDERNESS</b>                            |
| <b>PAIN IN SPINE</b>                   | <b>PALMAR PAIN</b>                     | <b>POST HERPETIC<br/>NEURALGIA</b>                 |
| <b>PAIN IN TESTICLE</b>                | <b>PANCREATALGIA</b>                   | <b>POSTCHORDOTOMY<br/>PAIN</b>                     |
| <b>PAIN IN TESTIS</b>                  | <b>PARASTERNAL PAIN</b>                | <b>POSTERIOR<br/>AURICULAR PAIN</b>                |
| <b>PAIN IN THE PHARYNX</b>             | <b>PARIETAL HEADACHE</b>               | <b>POSTERIOR CERVICAL<br/>PAIN</b>                 |
| <b>PAIN IN THORACIC<br/>SPINE</b>      | <b>PAROXYSMAL NERVE<br/>PAIN</b>       | <b>POSTERIOR CERVICAL<br/>PAINS</b>                |
| <b>PAIN IN THROAT</b>                  | <b>PELVIC AND PERINEAL<br/>PAIN</b>    | <b>POSTERIOR<br/>COMPARTMENT LOW<br/>BACK PAIN</b> |
| <b>PAIN IN THUMB</b>                   | <b>PELVIC PAIN FEMALE</b>              | <b>POSTERIOR HEEL PAIN</b>                         |
| <b>PAIN IN THYROID</b>                 | <b>PELVIC PAINS</b>                    | <b>POSTERIOR KNEE PAIN</b>                         |
| <b>PAIN IN TOE</b>                     | <b>PENILE PAIN</b>                     | <b>POSTERIOR NECK PAIN</b>                         |
| <b>PAIN IN URETHRA</b>                 | <b>PERIANAL PAIN</b>                   | <b>POSTERIOR NECK<br/>PAINS</b>                    |
| <b>PAIN IS RESOLVED</b>                | <b>PERINEAL PAIN</b>                   |                                                    |
| <b>PAIN OF FACE</b>                    | <b>PERIPHERAL<br/>NEUROGENIC PAIN</b>  |                                                    |
| <b>PAIN OF<br/>HYPOGASTRIUM</b>        | <b>PERIPHERAL<br/>NEUROPATHIC PAIN</b> |                                                    |
| <b>PAIN OF JAW</b>                     | <b>PERITONEAL PAIN</b>                 |                                                    |
| <b>PAIN OF SCROTUM</b>                 |                                        |                                                    |

|                                |                                     |                                        |
|--------------------------------|-------------------------------------|----------------------------------------|
| POSTHERPETIC NEURALGIA         | REFRACTORY PAIN                     | RIGHT SIDE ", " WITH PREAURICULAR PAIN |
| POSTURAL LOW BACK PAIN         | REGIONAL LYMPH NODE PAIN            | RIGHT SIDE WITH PREAURICULAR PAIN      |
| PREAURICULAR PAIN              | RENAL ANGLE PAIN                    | RIGHT SIDED ABDOMINAL PAIN             |
| PRECORDIAL CHEST PAIN          | RENAL ANGLE TENDERNESS              | RIGHT SIDED CHEST PAIN                 |
| PRECORDIAL PAIN                | RETROORBITAL PAIN                   | RIGHT SUBCOSTAL PAIN                   |
| PRIMARY PAIN DUE TO MALIGNANCY | RETROSTERNAL                        | RIGHT SUBSCAPULAR PAIN                 |
| PROCTALGIA                     | RETROSTERNAL BURNING                | RIGHT UPPER QUADRANT ABDOMINAL PAIN    |
| PROGRESSIVE PAIN               | RETROSTERNAL PAIN                   | RLQ ABDOMINAL PAIN                     |
| PROSTATE PAIN                  | RIB PAIN                            | RUQ ABDOMINAL PAIN                     |
| PROSTATIC PAIN                 | RIF RIGHT ILIAC FOSSA PAIN          | SACRAL BACK PAIN                       |
| PSEUDOTHALAMIC PAIN            | RIGHT FLANK PAIN                    | SACRAL PAIN                            |
| PULSATILE PAIN                 | RIGHT HIP PAIN                      | SACROILIAC PAIN                        |
| RADIATING PAIN                 | RIGHT ILIAC FOSSA PAIN              | SCALP PAIN                             |
| RADICULAR PAIN                 | RIGHT KNEE JOINT PAIN               | SCAPULALGIA                            |
| REBOUND TENDERNESS             | RIGHT KNEE PAIN                     | SCAPULODYNIA                           |
| RECTAL PAIN                    | RIGHT LOWER INTERCOSTAL PAIN        | SCARPA TRIANGLE PAIN                   |
| RECTALGIA                      | RIGHT LOWER QUADRANT ABDOMINAL PAIN | SCIATIC NERVE PAIN                     |
| RECURRENT ABDOMINAL PAIN       | RIGHT LOWER QUADRANT PAIN           | SCIATICA                               |
| RECURRENT HEADACHES            | RIGHT PREAURICULAR PAIN             | SCLEROTOMAL PAIN                       |
| RECURRENT LOW BACK PAIN        |                                     | SCOLINE PAINS                          |
| RECURRENT PAIN                 |                                     |                                        |



SECONDARY PAIN DUE  
TO MALIGNANCY

SEMINAL VESICULAR  
PAIN

SENSE OF PAIN

SEVERE BACK PAIN

SEVERE EYE PAIN

SEVERE HEADACHE

SEVERE PAIN

SHARP CHEST PAIN

SHARP PAIN

SHIN PAIN

SHOOTING PAIN

SHOULDER PAIN

SHOULDER PAIN FROM  
ABDOMEN

SHOULDER PAIN LEFT

SHOULDER PAIN RIGHT

SHOULDER  
PERIARTICULAR PAIN

SIGNIFICANT PAIN

SITE UNSPECIFIED PAIN  
IN JOINT

SKULL PAIN

SLIGHT PAIN

SOMATIC PAIN

SOME PAIN

SOMEWHAT PAINFUL

SORE PAIN

SORE THROAT

SORE THROAT  
SYMPTOM

SORE THROATS

SORE TO TOUCH

SORENESS

SORENESS OF TONGUE

SORETHROAT

SPERMATIC CORD PAIN

SPLITTING PAIN

SPORADIC PAIN

SUBCOSTAL PAIN

SUBDELTOID BURSAL  
PAIN

SUBSCAPULAR PAIN

SUBSTANTIAL PAIN

SUBSTERNAL CHEST  
PAIN

SUPERFICIAL PAIN

TEMPOROMANDIBULAR  
JOINT ARTHRALGIA

TEMPOROMANDIBULAR  
JOINT PAIN

TENDER PAIN

TENDERNESS

TENDON PAIN

TESTES PAIN

TESTICULAR PAIN

THALAMIC PAIN

THORACIC BACK PAIN

THORACIC NERVE  
ROOT PAIN

THORACIC PAIN

THORACIC PAIN ACUTE  
BACK

THROAT DISCOMFORT

THROAT SORENESS

THROAT SORENESS  
SYMPTOM

TMJ PAIN

TRANSIENT PAIN

TRUNK PAIN

TUMOR ASSOCIATED  
PAIN

TUMOR PAIN

ULCER TYPE PAIN

UNCONTROLLED PAIN

UNSPECIFIED BACK  
PAIN

UNSPECIFIED  
BACKACHE

UNSPECIFIED SITE  
ABDOMINAL PAIN

UPPER BACK PAIN

UPPER CHEST PAIN

UPPER HUMERAL PAIN

URETERIC PAIN

URETHRAL PAIN

VEIN PAIN

URETHRAL MEATAL  
PAIN

URINARY PAIN

VISCERAL ABDOMINAL  
PAIN

URINARY TRACT PAIN

## Appendix Table 6 – Examples of Inter Annotator Agreement and Disagreement

### Agreements on all dimensions, severity, date, and body location

- “He had a bad weekend with severe **pain** which has now been under control for the three days prior to admission.” [agreement on: severe pain, three days prior to admission, no body location provided]
- “There is mild point **tenderness** of the right clavicle and right shoulder.” [agreement on some pain, the date of the encounter, and body location right clavicle]
- “In addition, he also developed substantial **pain** in the left lateral ribs as well.” [agreement on: severe pain, the date of the encounter, and body location ribs]

### Disagreements on severity

#### Some Pain

- “Pain control Apparently Hydrocodone is not controlling his **pain** well and he is intolerant of Oxycodone, and I am reluctant to give him nonsteroidal agents given his anemia.” [annotator 1: severe pain, annotator 2: some pain, reason for disagreement: Hydrocodone, a narcotic, is not enough to alleviate the subject’s pain must be severe, final disposition: some pain; agreement on date of encounter and no body location]
- “I suggested that he try Trental, 400 mg. t.i.d., to see if this may alleviate his **claudication**.” [annotator 1: missed mention entirely, annotator 2: some pain, reason for disagreement: annotator error, final disposition: some pain; date of encounter and body location: legs]

#### Controlled Pain

- “Responding well to treatment with decreased **pain** and decreased PSA.” [annotator 1: controlled pain, annotator 2: some pain, reason for disagreement: annotator error, final disposition: controlled pain; agreement on use of the default date (date of encounter), and no body location]
- “He did state that during his therapy he noted a substantial improvement in his left foot **pain**.” [annotator 1: controlled pain, annotator 2: some pain, reason for disagreement: not clear if foot pain fully controlled, final disposition: controlled pain; agreement on use of the default date (date of encounter), and body location left foot]

#### Severe Pain

- “In obvious **pain** with manipulation, non-verbal moaning.” [annotator 1: severe pain, annotator 2: some pain, reason for disagreement: context indicates pain must be severe, final disposition: severe pain; agreement on date of encounter and no body location]

- “He states that this **pain** presented as a "twinge of pain" and has progressed into a "severe" pain.” [annotator 1: some pain, annotator 2: severe pain, reason for disagreement: ‘this pain’ is now ‘severe pain’ but was ‘a twinge of pain’, final disposition: severe pain; agreement on date of encounter and no body location]

### **Disagreements on Date**

- “Here on friday trouble with **pain** in low chest rib area no better taking MS 15mg bid Roxicodone 5mg every 6 hours.” [annotator 1: date of encounter, annotator 2: the Friday before encounter, reason for disagreement: annotator error, final disposition: the Friday before encounter; agreement on some pain, disagreement on location (see below)]
- “He had bone scan evidence of progression in February and now has had a marked increase in his **pain**.” [annotator 1: February, annotator 2: the date of the encounter, reason for disagreement: annotator error, final disposition: the date of the encounter; agreement on some pain and on no body location]

### **Disagreements on Body Location**

- “Here on friday trouble with **pain** in low chest rib area no better taking MS 15mg bid Roxicodone 5mg every 6 hours.” [annotator 1: body location ribs, annotator 2: body location chest, reason for disagreement: confusing text, final disposition: Ribs; agreement on some pain, disagreement on date (see above)]
- “This is per the patient as the records are not available at this time, Since completing his therapy to his hip and spine, he has actually had some improvement of his **pain**.” [annotator 1: body location hip, annotator 2: body location region coxae, reason for disagreement: terminology, final disposition: hip region structure; agreement on some pain and date of encounter]

**Appendix Figure 1 Example of NLP pattern matching and system component interaction.**

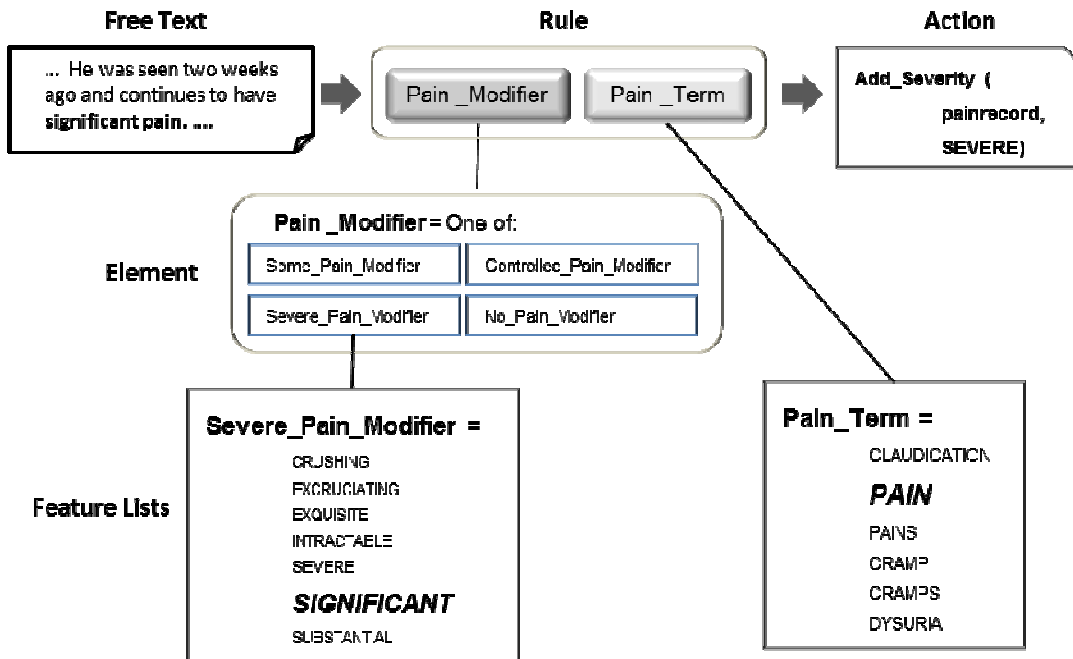

## **Appendix Figure 2 Subject Group Pain Summary Display.**

**A: Max Pain per Month.** Maximum pain category for each subject for each month up to time of death from metastatic prostate cancer. When no report was available for a given month, most recent pain category reported for a given subject was used as imputed value for a given subject. Blue indicates pain status not reported, Green, no pain (Category 0), Yellow, pain (Category 1), Orange, controlled pain (Category 2), and Red, severe pain (Category 3).

**B: Worst Pain to Date.** Using same color indicators as above, this figure summarizes the worst pain category detected for each subject for each month up to the time of death from prostate cancer. Severe pain occurred at least once in all but two of 33 subjects.

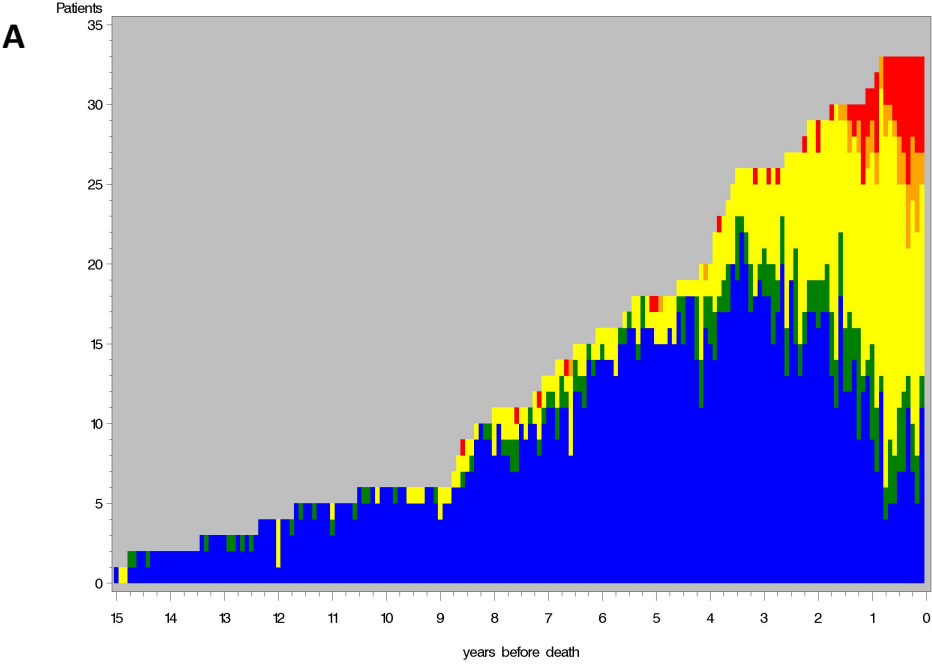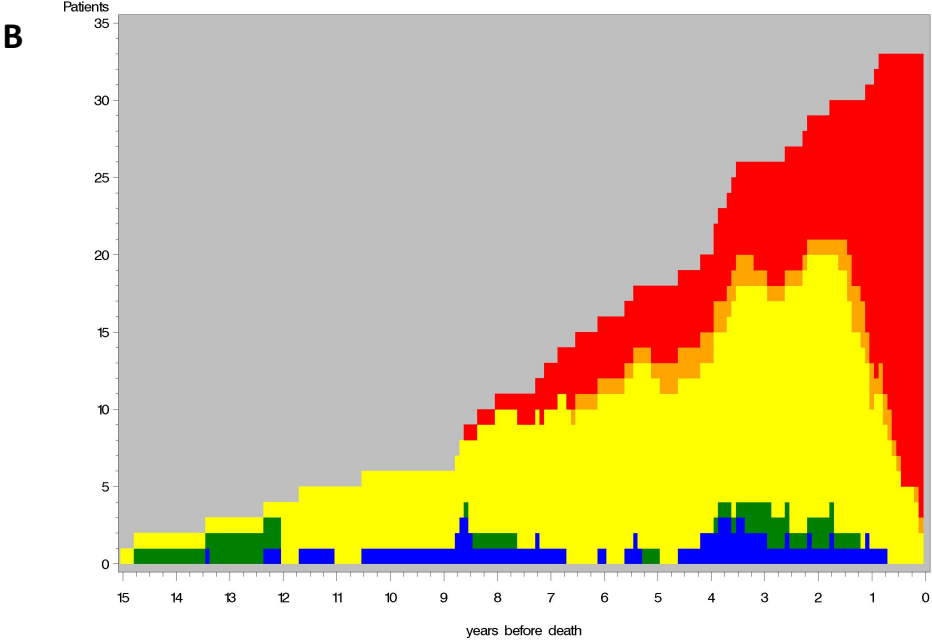

**i2b2 Discharge  
Summary Text  
Evaluation –  
Detailed  
Description**

**Formatting  
processes**  
The 889  
unannotated,  
de-identified  
discharge  
summaries  
dataset from  
i2b2 were  
saved as  
individual files  
using a simple  
javascript. The  
same script was  
used to insert a

reference date tag around the Date of Admission for each report (when the date of Admission was present). For example in the header in Record 1 this section was converted from its original format:

```
...  
UNIT NUMBER :  
636-48-57  
ADMISSION DATE :  
12/07/2006  
DISCHARGE DATE :  
12/09/2006  
PRINCIPAL DIAGNOSIS :  
Hyperkalemia .  
...
```

To the format:

```
...  
UNIT NUMBER :  
636-48-57  
ADMISSION DATE :  
<DATE> 12/07/2006</DATE>  
DISCHARGE DATE :  
12/09/2006  
PRINCIPAL DIAGNOSIS :  
Hyperkalemia .  
...
```

Any date in a document so tagged is recognized by the system as the reference date to use for the resolution of ambiguous dates, using the process described in this Appendix under Date Resolution.

The rest of the text was unchanged in the formatting process.

**i2b2 Corpus Development, Candidate Test, and Actual Test Sets**

Using the AeroText Corpus Analyzer Tool, the 889 file corpus was split into two representative subsets, a 621 file development set and a 266 file candidate test set (the Corpus Analyzer tool was unable to process 2 of the 889 files, so they were discarded from the corpus for this evaluation). The Corpus Analyzer tool uses various file statistical measures to build subsets that mirror the overall corpus. The contents of the files in the Candidate Test Set remained blind to the NLP developers at all times.

The documents for the test set annotation by the subject matter experts were chosen from the 266 candidate test set. To create the Actual Test Set, we ran the system over the 266 candidate test set files and picked 38 documents with Pain extractions (looking only at the categories of the extracted information, not the documents or the text of the extractions). We attempted to choose discharge reports of a variety of file sizes and from a number of places in the ID sequence (that is some from the beginning, middle, and end of the ID sequence). We next verified that the set of pain extractions from those 38 documents included pain at all 4 severity levels. Finally, we randomly chose 2 files from the candidate test set that included the word “aspirin” but where the system did not find a pain extraction. During the annotation process (described below) we had the resources to annotate 30 of those 40 files to create the final 30 file blind test set.

The Corpus Analyzer tool produces statistical reports, to validate that the test set is an accurate reflection of the entire data set. These are shown in below in Online Appendix Table 7.



**Appendix Table 7 - i2b2 Corpus Measures and Comparison with i2b2 Subsets**

| Statistic                                                      | Total Corpus (Dev + test, 887 files) |       |      |         | Development Set (621 files) |       |      |         | Candidate Test Set(266 Files) |       |      |         | Actual Test Set (30 files) |       |      |         |
|----------------------------------------------------------------|--------------------------------------|-------|------|---------|-----------------------------|-------|------|---------|-------------------------------|-------|------|---------|----------------------------|-------|------|---------|
|                                                                | Min                                  | Max   | Mean | Std Dev | Min                         | Max   | Mean | Std Dev | Min                           | Max   | Mean | Std Dev | Min                        | Max   | Mean | Std Dev |
| File Size (bytes)                                              | 133                                  | 16196 | 3658 | 2686    | 133                         | 16196 | 3579 | 2444    | 133                           | 14954 | 3738 | 2908    | 1800                       | 12145 | 5571 | 2728    |
| Number of characters per paragraph in the corpus               | 114                                  | 13332 | 2350 | 2164    | 114                         | 13332 | 2369 | 2094    | 133                           | 12756 | 2332 | 2232    | 297                        | 11598 | 2814 | 2821    |
| Number of characters per sentence in the corpus                | 23                                   | 148   | 59   | 19      | 25                          | 121   | 59   | 18      | 23                            | 148   | 59   | 20      | 36                         | 106   | 70   | 19      |
| Number of characters per token in the corpus                   | 35                                   | 59    | 48   | 3       | 37                          | 59    | 48   | 3       | 35                            | 55    | 48   | 3       | 43                         | 54    | 49   | 3       |
| Number of Person entities extracted per every 1000 tokens      | 0                                    | 54    | 10   | 10      | 0                           | 54    | 10   | 9       | 0                             | 50    | 10   | 11      | 0                          | 24    | 5    | 6       |
| Count of Organization entities extracted per every 1000 tokens | 0                                    | 34    | 5    | 7       | 0                           | 30    | 5    | 7       | 0                             | 34    | 5    | 7       | 0                          | 12    | 3    | 3       |
| Count of Place entities extracted per every 1000 tokens        | 0                                    | 16    | 0    | 2       | 0                           | 16    | 1    | 2       | 0                             | 14    | 0    | 2       | 0                          | 5     | 0    | 1       |
| Count of Time entities extracted per every 1000 tokens         | 1                                    | 44    | 13   | 6       | 1                           | 44    | 14   | 6       | 1                             | 38    | 13   | 6       | 2                          | 19    | 10   | 4       |

|                                                          |    |     |     |     |    |     |     |     |    |     |     |     |     |     |     |     |
|----------------------------------------------------------|----|-----|-----|-----|----|-----|-----|-----|----|-----|-----|-----|-----|-----|-----|-----|
| Count of Number entities extracted per every 1000 tokens | 18 | 179 | 68  | 24  | 18 | 166 | 67  | 23  | 25 | 179 | 68  | 25  | 26  | 85  | 55  | 14  |
| Count of all-upper-case tokens per every 1000 tokens     | 19 | 661 | 134 | 73  | 30 | 661 | 136 | 70  | 19 | 348 | 131 | 75  | 35  | 277 | 113 | 75  |
| Count of all-lower-case tokens per every 1000 tokens     | 3  | 725 | 408 | 162 | 3  | 710 | 407 | 149 | 38 | 725 | 408 | 174 | 159 | 723 | 500 | 141 |
| Count of all-capital tokens per every 1000 tokens        | 8  | 274 | 105 | 37  | 8  | 274 | 104 | 34  | 47 | 250 | 107 | 39  | 47  | 144 | 86  | 21  |

The mean values for these 12 measures, for the 4 corpora, are shown in Online Appendix Figure 3. The figures show that the final 30 document test set is an adequate representation of the entire corpus.

### Appendix Figure 3 - Comparison of Mean Values across the 4 i2b2 Corpora Subsets

For the four i2b2 corpora subsets (total set, development set, candidate test set, and actual test set) created from the i2b2 De-identified Discharge Summaries, mean values for the 12 measures shown in Appendix Table 7 are depicted. The figure indicates that the Actual Test Set is a reasonably good representation of the entire corpus in terms of these 12 text content parameters.

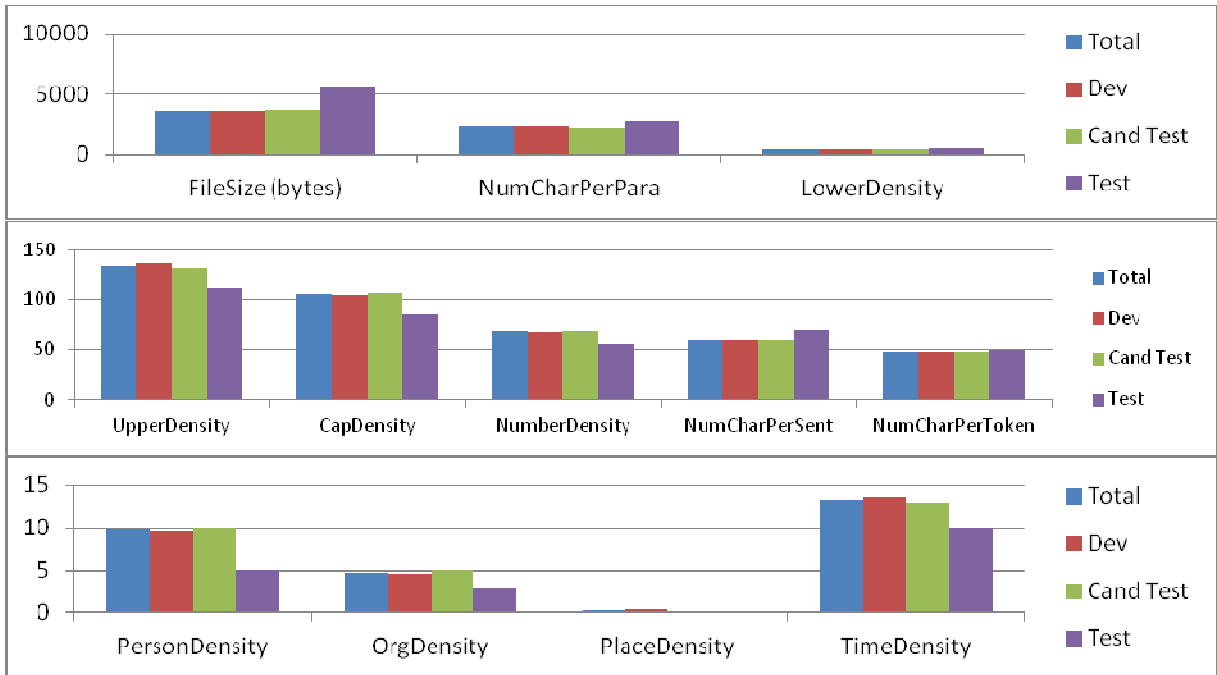

## **i2b2 Discharge Summary Text Corpus Inter-Annotator Agreement**

As described in the main manuscript (and using the same process we describe in the paper for the original PELICAN corpus), we bootstrapped the annotations using a system run. The two subject matter experts separately corrected two copies of the system output, with the help of a developer, not otherwise involved in the project, or our 'dispassionate developer.' Using the Scoring component of the AeroText Tool suite, we compared the 2 corrected annotations in order to obtain a measure of Inter Annotator Agreement. The agreement is shown in Online Appendix Table 8.

**Appendix Table 8 - i2b2 Corpus Inter-Annotator Agreement on (A) Pain Mention, Pain Start and End Date and Body Location, and (B) Pain Category.**

| <b>A</b>                     |                  | <b>B</b>                                |                  |
|------------------------------|------------------|-----------------------------------------|------------------|
|                              | <b>Agreement</b> |                                         | <b>Agreement</b> |
| <b>Pain Mention</b>          | 0.88             | <b>No Pain</b>                          | 0.81             |
| <b>Start Date of Pain</b>    | 0.79             | <b>Some Pain</b>                        | 0.86             |
| <b>End Date of Pain</b>      | 0.74             | <b>Controlled Pain</b>                  | 0.81             |
| <b>Body Location of Pain</b> | 0.71             | <b>Severe Pain</b>                      | 0.62             |
|                              |                  | <b>Category of Pain Overall Average</b> | <b>0.85</b>      |

After the measure of inter-annotator agreement, the two SMEs and a developer not directly involved in the project met again to adjudicate each disagreement and create a single, agreed upon *gold standard annotation*. The NLP developers on this project were not in attendance at this meeting.

### **Initial System Score on Actual Test Set**

We next ran the system on the 30 file i2b2 Actual Test Set, with no modification in rules from the system run on the PELICAN corpus. We scored the results against the approved *gold standard annotation*. The ‘dispassionate developer’ was used one more time to spot check the results to ensure that no errors had been introduced into the gold standard. He confirmed that all errors were legitimate errors the system had made (but did not report details). The Initial Actual Test Set results are shown in Online Appendix Table 9.

**Appendix Table 9 - Initial Accuracy of NLP Algorithm Extraction of Pain Mentions on the 30 file Actual Test Set i2b2 Corpus- (A) Pain Mention, Pain Start and End Date, and Body Location and (B) Pain Category (TP: True Positive, INC: Incorrect, FN: False Negative, FP: False Positive, Rec: Recall, PRE: Precision, F-M: F-Measure).**

|             |                        | TP         | INC | FN       | FP        | REC         | PRE         | F-M         |
|-------------|------------------------|------------|-----|----------|-----------|-------------|-------------|-------------|
| <b>PAIN</b> |                        | <b>105</b> |     | <b>6</b> | <b>27</b> | <b>0.95</b> | <b>0.80</b> | <b>0.87</b> |
| startdate   |                        | 59         | 46  | 6        | 27        | <b>0.53</b> | <b>0.45</b> | <b>0.49</b> |
| enddate     |                        | 61         | 44  | 6        | 27        | <b>0.55</b> | <b>0.46</b> | <b>0.51</b> |
| bodyloc     |                        | 65         |     | 41       | 17        | <b>0.61</b> | <b>0.79</b> | <b>0.70</b> |
| severity    |                        | 93         | 12  | 6        | 27        | <b>0.84</b> | <b>0.70</b> | <b>0.77</b> |
|             | <i>no pain</i>         | 17         | 1   |          | 5         | <b>0.94</b> | <b>0.74</b> | <b>0.84</b> |
|             | <i>some pain</i>       | 67         | 11  | 2        | 22        | <b>0.84</b> | <b>0.67</b> | <b>0.75</b> |
|             | <i>controlled pain</i> | 5          |     | 3        |           | <b>0.63</b> | <b>1.00</b> | <b>0.81</b> |
|             | <i>severe pain</i>     | 4          |     | 1        |           | <b>0.80</b> | <b>1.00</b> | <b>0.90</b> |
|             |                        | 93         | 12  | 6        | 27        | <b>0.84</b> | <b>0.70</b> | <b>0.77</b> |

### **Development on i2b2 corpus**

The PELICAN corpus consists of attending physician notes, nurse and nurse practitioner notes, progress notes, and a few relatively rare discharge summaries for a set of prostate cancer patients. The i2b2 text records are discharge summaries for general patients dictated by physicians in training at a teaching hospital. The length, stylistic conventions, and contents of the two corpora are thus different.

In our experience we find that text corpora always have idiosyncrasies (new acronyms, new phrasings, new standards) that can substantially reduce performance if not addressed. Therefore, a relatively short period of ten hours of development and testing was needed to update the NLP system developed for the PELICAN corpus for use with the i2b2 corpus, differences between which are discussed in greater detail below. The

development work was completed on the i2b2 documents reserved for the development set. The Actual Test Set remained blind to the NLP developers during the entire i2b2 annotation, development, and evaluation effort. The ten hours of development focused on 3 areas of stylistic difference. (See below for a more detailed discussion on the differences and the rules to address them)

1. Rules to record new mentions of hypothetical and negative mentions. Sentences that started with phrases like:

“Please seek medical attention if ...”

2. Rules to detect and disambiguate person names, such as “Dr. Lenni Pain” and “BERLNI KIDNEY , M.D.”

3. Rules to ignore undated, or under specified mentions of pain. These rules picked up phrases such as the mentions below. In neither mention of pain can a human determine at least a month and year.

He underwent a CABG for four vessels in 1980 and did well until 1992 when he began to experience episodic chest pain . He continued to have episodes of angina for the subsequent several years . (Record ID 848)

Upon completion of the development period the system output was again scored against the Test set ground truth. The post development scores are shown in Online Appendix Table 10.

**Appendix Table 10 - Final Accuracy of NLP Algorithm Extraction of Pain Mentions on the blind i2b2 Corpus (TP: True Positive, INC: Incorrect, FN: False Negative, FP: False Positive, Rec: Recall, PRE: Precision, F-M: F-Measure).**

|             |                        | TP         | INC | FN       | FP        | REC         | PRE         | F-M         |
|-------------|------------------------|------------|-----|----------|-----------|-------------|-------------|-------------|
| <b>PAIN</b> |                        | <b>105</b> |     | <b>6</b> | <b>17</b> | <b>0.95</b> | <b>0.86</b> | <b>0.90</b> |
| startdate   |                        | 74         | 31  | 6        | 17        | 0.67        | 0.61        | 0.64        |
| enddate     |                        | 73         | 32  | 6        | 17        | 0.66        | 0.60        | 0.63        |
| bodyloc     |                        | 64         |     | 42       | 10        | 0.60        | 0.86        | 0.73        |
| severity    |                        | 94         | 11  | 6        | 17        | 0.85        | 0.77        | 0.81        |
|             | <i>no pain</i>         | 18         | 1   |          | 3         | 0.95        | 0.82        | 0.88        |
|             | <i>some pain</i>       | 67         | 10  | 2        | 14        | 0.85        | 0.74        | 0.79        |
|             | <i>controlled pain</i> | 5          |     | 3        |           | 0.63        | 1.00        | 0.81        |
|             | <i>severe pain</i>     | 4          |     | 1        |           | 0.80        | 1.00        | 0.90        |
|             |                        | 94         | 11  | 6        | 17        | 0.85        | 0.77        | 0.81        |

## **Differences between PELICAN and i2b2 text Corpora**

### **Named Entities**

All names had been redacted from the PELICAN corpus using a standard method described above, whereas the i2b2 discharge summaries have been deidentified via pseudonyms such as:

- “BERLNI KIDNEY , M.D.” (record ID 1),
- “ROCOMPELKSTHYS , RITA NA , M.D.” (record ID 2),
- “Dr. New” (Record ID 3)
- “Dr. Lenni Pain” (record ID 775).
- “Dr. Stisie H. Pain” (record ID 832)

Our system contained the infrastructure, rules, templates, etc. to detect and extract person names, but as it was not needed in the PELICAN corpus, and as the Discharge Summary pseudonyms are somewhat unusual, there was some rule tuning required to better disambiguate the cases where valid medical concepts such as pain were used as names (generally for surnames).

### **Differences in Dates and Times**

The Discharge Summaries contain far more vague date references than the PELICAN dataset. For example, in i2b2 Record ID 848:

He underwent a CABG for four vessels in 1980 and did well until 1992 when he began to experience episodic chest pain. He continued to have episodes of angina.

Or, in Record ID 832:

At baseline the patient has occasional dyspnea on exertion while walking up stairs.

Additional study is required, but our findings suggest that discharge report syntax tends to focus on more broad overviews of the disease, rather than inpatient/outpatient clinical

encounter notes which are more specific. This could indicate the importance of using varied clinical records types and sources in future testing so that information that tends to be missing in one record type can be found instead in other record types. In any case these unspecified “episodes” and uncertain start and end points caused some consternation amongst the annotation team.

Additionally, dates caused the human annotators issues in some cases where the de-identification process resulted in admission and discharge dates that did not make sense. For example, i2b2 discharge record 873 has an admission date of 3/30/1999 and a discharge date of 9/16/2006, which appeared incorrect based on the discharge summary text contents, but this could not be verified. Some records were missing either an admission date or a discharge date.

After much discussion amongst the SMEs and a developer not involved in the NLP during the annotation process, it was decided that only pain mentions that could be tied by the annotator to a specific date would be tagged. While in the PELICAN corpus we did use date ranges for year and even decade mentions, in this effort the annotation decision was made to ignore pain mentions that could not be pinpointed to at least a month and year (where the date range would cover the beginning of the month to the last date of the month).

The confusion over dates is reflected in the inter-annotator agreement scores for the start and end points in date ranges. The start date agreement measure for the Discharge Summaries is 14 points lower than the start date agreement measure for the PELICAN corpus. Similarly, the i2b2 end date agreement is 17 points lower.

During the 10 hour development period, an effort was made to update the system for this new constraint, however resources were limited. The extraction system did not do as well on the timestamping due to these restrictions. Given additional development time, we believe we could address these issues and bring up the date start and end scores.

### **More past tense descriptions**

Not surprisingly, the i2b2 discharge summaries contain more past tense verbs, while the PELICAN corpus tended to describe things in present tense. The PELICAN corpus contains many records created on the day of or at the time the patient was encountered, where by definition discharge summaries are created after a patient has left the hospital.

### **More Hypothetical wordings**

Because physicians tend to issue a number of standard “warning” statements upon patient discharge into their own or others care, in the i2b2 corpus as compared to the



PELICAN corpus there were many more directive sentences that contained hypothetical pain mentions. Examples in i2b2 include sentences that started with phrases like:

“Please seek medical attention if ...”

“[Patient] was told to call if ...”

### **Pain descriptions follow slightly different patterns**

The discussion of pain in the i2b2 corpus sometimes followed patterns that were not typically seen in the PELICAN corpus. For example, in Record ID 628, the clinician reports that the patient has no abdominal pain "other than as mentioned." So, as one of our annotators notes, the patient has both presence of abdominal pain in one location in the abdomen, and lack of it in all other parts of the abdomen in the same record. In future work, we will have to address this type of situation.

### **Appendix Table 11 Pain concepts that automatically mapped to severity level (given the absence of other contextual information such as negation).**

This is the subset of the pain concepts shown in Appendix Table 5 where the system would automatically assign severity level given no additional context information. These are concepts present in the PELICAN corpus, where the severity of the pain is embedded within the concept itself. Note that all pain concepts are initially defaulted to severity level 1, “some pain.” In the majority of cases, the severity is then set based on the context in which the concept is mentioned.

|                     |   |
|---------------------|---|
| "CRUSHING PAINS"    | 3 |
| "EXCRUCIATING PAIN" | 3 |
| "EXQUISITE PAIN"    | 3 |
| "INTRACTABLE PAIN"  | 3 |
| "SEVERE BACK PAIN"  | 3 |
| "SEVERE HEADACHE"   | 3 |
| "SEVERE PAIN"       | 3 |
| "ABSENCE OF PAIN"   | 0 |

## Annotation Instructions for the i2b2 discharge reports corpus

The following were the instructions provided to our Subject Matter Experts for using the AeroText Answer Key editor to create annotation sets bootstrapped with system output.

March 8, 2012

### How to Make a Pelican Answer Key

1. Print off the target list of documents (last page of this Word file). Having it in hardcopy will make things easier. Start at the top of the list and work your way through. Both Steve's answer key and Robs must cover the same documents.
2. Open the Document List in the middle left panel of the answer key editor
3. Find a document that is on the target list
4. Using the right mouse button while hovering the cursor over the document name, choose Group By Slot -> ScoreType. Now you will see the record types in this report.
5. Using the right mouse button while hovering the cursor over the HealthStatusRecord choose Group By Slot -> PAIN. Open up the list titled Y
6. This is the list of pain records found in this report. We are interested in *actual* pain experienced (or denied), not hypothetical pain. Go through each one, by clicking on it and checking its slots as shown in the bottom panel. The bolded slots are the ones that will be scored
  - a. **ScoreType** should always be HealthStatusRecord
  - b. **Source** is the document name, it will always be correct
  - c. **Region** is the spot in the text. You can adjust the boundaries of the region if it includes more words (like "the pain"), or not enough words. Make sure the text is not highlighted in the document, then holding down the right button, drag the cursor to mark the correct region. When you let go of the right button, the menu will appear, choose Adjust Boundries.
  - d. **ConceptName** is the normalized name. Capitalization and Punctuation and Consistency all count toward a match when we score. Use the ConceptNamesLookup spreadsheet.
  - e. **BodyLocations** despite the name, it can only take one value. Again this is a normalized name. Use the ConceptNamesLookup spreadsheet. (Note: BodyLocation is not a score we are all that concerned about)
  - f. **SeverityScale**, 0 = explicitly no pain, 1 = some pain, 2 = controlled pain (pain that is being treated), 3 = clearly severe pain (8-10 on the pain scale)
  - g. **enddate**, (note that enddate appears BEFORE startdate in the list, sorry, it's hard to change that), not as important as start date, but still useful (if slots need to be sacrificed for the sake of time, sacrifice this one first)
  - h. **startdate**, time consuming, I know, but it would look good in the paper if we do well with dates.
  - i. **Patient** should almost always be PATIENT, but is used for other persons, so it could be something like MOTHER, FATHER, AUNT, etc.
7. *Deleting* an incorrect record: use the right mouse button while hovering over the record in the middle left panel and choose Delete.
8. *Adding* a new slot: after checking all the records that were extracted, review the report for any mentions of pain that were missed (see the ConceptNamesLookup spreadsheet for the terms for pain). If you find one, select the text with the LEFT mouse button, then click on HealthStatusRecord in the upper left panel of the answer key tool. A new

- Record will be created in the bottom panel with only the **ScoreType**, **Source**, and **Region** slots filled in. Fill in each of the Bolded slots *plus* the PAIN slot (set it to Y).
- a. Click in the slot, and a Slot Details panel in the middle of the bottom will open, usually with an Edit Slot button beneath that.
  - b. Click the Edit Slot button to open a panel in the bottom right. Be sure to click the OK button on the bottom right when you are done and also click a new slot to ensure the value is properly registered
9. Once you are finished with a document, cross it off your list. It will be very difficult online to tell which documents have been corrected and which have not.
  10. When in doubt, the “right” answer is what you as a human know when you read the text.
  11. Regularly save the answer key as you go.

## Target List of Documents

|         |     |
|---------|-----|
| 100.txt | 862 |
| 101     | 865 |
| 110     | 873 |
| 122     | 874 |
| 18      | 880 |
| 892     | 600 |
| 900     | 603 |
| 901     | 604 |
| 912     | 611 |
| 94      | 628 |
| 55      | 218 |
| 500     | 235 |
| 562     | 239 |
| 564     | 260 |
| 565     | 275 |
| 140     | 708 |
| 145     | 71  |
| 147     | 718 |
| 152     | 719 |
| 161     | 730 |

## XML version of adjudicated Pain Annotations on i2b2 test set

Please note that for slots of type "region" region start and end numbers are the numbers of characters from the start of the document

```
<?xml version="1.0" encoding="UTF-8"?>
<infStore>
<records>
<record id="0" template="HealthStatusRecord">
<slot name="ScoreType" type="string">HealthStatusRecord</slot>
<slot name="_score_ScoreType" type="string"></slot>
<slot name="source" type="string">C:\i2b2 eval\Subsets\Test\110.txt</slot>
<slot name="_score_source" type="string"></slot>
<slot name="region" type="region">
<region end="1913" start="1904">back pain</region>
</slot>
<slot name="_score_region" type="string"></slot>
<slot name="rule" type="string">HealthStatusItemPkg/0</slot>
<slot name="ConceptName" type="string">BACK PAINS</slot>
<slot name="_score_ConceptName" type="string"></slot>
<slot name="SemanticType" type="string">Sign or Symptom</slot>
<slot name="BodyLocations" type="string">BACK</slot>
<slot name="_score_BodyLocations" type="string"></slot>
<slot name="SeverityStrings" type="string"></slot>
<slot name="UMLS_CUI" type="string">C0004604</slot>
<slot name="DaysBeforeDeath" type="int">0</slot>
```

```
<slot name="PAIN" type="string">Y</slot>
<slot name="MaxPain" type="int">1</slot>
<slot name="SeverityScale" type="int">1</slot>
<slot name="_score_SeverityScale" type="string"></slot>
<slot name="polarity" type="string">POSITIVE</slot>
<slot name="DocType" type="string"></slot>
<slot name="PatientID" type="int">0</slot>
<slot name="DateObject" type="record"/>
<slot name="enddate" type="date">
<date day="24" month="12" year="1998"/>
</slot>
<slot name="_score_enddate" type="string"></slot>
<slot name="startdate" type="date">
<date day="24" month="12" year="1998"/>
</slot>
<slot name="_score_startdate" type="string"></slot>
<slot name="Patient" type="string">PATIENT</slot>
<slot name="_score_Patient" type="string"></slot>
<slot name="_keyref" type="record"/>
<slot name="_score" type="string"></slot>
<slot name="_type" type="string"></slot>
</record>
<record id="1" template="HealthStatusRecord">
<slot name="ScoreType" type="string">HealthStatusRecord</slot>
<slot name="_score_ScoreType" type="string"></slot>
<slot name="source" type="string">C:\i2b2 eval\Subsets\Test\110.txt</slot>
```

```
<slot name="_score_source" type="string"></slot>
<slot name="region" type="region">
<region end="2719" start="2709">discomfort</region>
</slot>
<slot name="_score_region" type="string"></slot>
<slot name="rule" type="string">HealthStatusItemPkg/0</slot>
<slot name="ConceptName" type="string">DISCOMFORT</slot>
<slot name="_score_ConceptName" type="string"></slot>
<slot name="SemanticType" type="string">Sign or Symptom</slot>
<slot name="BodyLocations" type="string">ABDOMEN</slot>
<slot name="_score_BodyLocations" type="string"></slot>
<slot name="SeverityStrings" type="string">MINIMAL</slot>
<slot name="UMLS_CUI" type="string">C2737161</slot>
<slot name="DaysBeforeDeath" type="int">0</slot>
<slot name="PAIN" type="string">Y</slot>
<slot name="MaxPain" type="int">1</slot>
<slot name="SeverityScale" type="int">1</slot>
<slot name="_score_SeverityScale" type="string"></slot>
<slot name="polarity" type="string">POSITIVE</slot>
<slot name="DocType" type="string"></slot>
<slot name="PatientID" type="int">0</slot>
<slot name="DateObject" type="record"/>
<slot name="enddate" type="date">
<date day="29" month="12" year="1998"/>
</slot>
<slot name="_score_enddate" type="string"></slot>
```

```
<slot name="startdate" type="date">
<date day="25" month="12" year="1998"/>
</slot>
<slot name="_score_startdate" type="string"></slot>
<slot name="Patient" type="string">PATIENT</slot>
<slot name="_score_Patient" type="string"></slot>
<slot name="_keyref" type="record"/>
<slot name="_score" type="string"></slot>
<slot name="_type" type="string"></slot>
</record>
</records>
</infStore>
<?xml version="1.0" encoding="UTF-8"?>
<infStore>
<records>
<record id="0" template="HealthStatusRecord">
<slot name="ScoreType" type="string">HealthStatusRecord</slot>
<slot name="_score_ScoreType" type="string"></slot>
<slot name="source" type="string">C:\i2b2 eval\Subsets\Test\122.txt</slot>
<slot name="_score_source" type="string"></slot>
<slot name="region" type="region">
<region end="415" start="401">right hip pain</region>
</slot>
<slot name="_score_region" type="string"></slot>
<slot name="rule" type="string">HealthStatusItemPkg/0</slot>
<slot name="ConceptName" type="string">RIGHT HIP JOINT PAIN</slot>
```



<slot name="\_score\_ConceptName" type="string"></slot>  
<slot name="SemanticType" type="string">Sign or Symptom</slot>  
<slot name="BodyLocations" type="string">RIGHT HIP REGION STRUCTURE</slot>  
<slot name="\_score\_BodyLocations" type="string"></slot>  
<slot name="SeverityStrings" type="string">PROGRESSIVE</slot>  
<slot name="UMLS\_CUI" type="string">C2202100</slot>  
<slot name="DaysBeforeDeath" type="int">0</slot>  
<slot name="PAIN" type="string">Y</slot>  
<slot name="MaxPain" type="int">1</slot>  
<slot name="SeverityScale" type="int">1</slot>  
<slot name="\_score\_SeverityScale" type="string"></slot>  
<slot name="polarity" type="string">POSITIVE</slot>  
<slot name="DocType" type="string"></slot>  
<slot name="PatientID" type="int">0</slot>  
<slot name="DateObject" type="record"/>  
<slot name="enddate" type="date">  
<date day="11" month="12" year="1997"/>  
</slot>  
<slot name="\_score\_enddate" type="string"></slot>  
<slot name="startdate" type="date">  
<date day="11" month="12" year="1997"/>  
</slot>  
<slot name="\_score\_startdate" type="string"></slot>  
<slot name="Patient" type="string">PATIENT</slot>  
<slot name="\_score\_Patient" type="string"></slot>  
<slot name="\_keyref" type="record"/>

```
<slot name="_score" type="string"></slot>
<slot name="_type" type="string"></slot>
</record>
</records>
</infStore>
<?xml version="1.0" encoding="UTF-8"?>
<infStore>
<records>
<record id="0" template="HealthStatusRecord">
<slot name="ScoreType" type="string">HealthStatusRecord</slot>
<slot name="_score_ScoreType" type="string"></slot>
<slot name="source" type="string">C:\i2b2 eval\Subsets\Test\152.txt</slot>
<slot name="_score_source" type="string"></slot>
<slot name="region" type="region">
<region end="3027" start="3025">CP</region>
</slot>
<slot name="_score_region" type="string"></slot>
<slot name="rule" type="string">HealthStatusItemPkg/0</slot>
<slot name="ConceptName" type="string">CHEST PAIN UNSPECIFIED</slot>
<slot name="_score_ConceptName" type="string"></slot>
<slot name="SemanticType" type="string">Sign or Symptom</slot>
<slot name="BodyLocations" type="string">CHEST</slot>
<slot name="_score_BodyLocations" type="string"></slot>
<slot name="SeverityStrings" type="string"></slot>
<slot name="UMLS_CUI" type="string">C1535568</slot>
<slot name="DaysBeforeDeath" type="int">0</slot>
```

```
<slot name="PAIN" type="string">Y</slot>
<slot name="MaxPain" type="int">1</slot>
<slot name="SeverityScale" type="int">1</slot>
<slot name="_score_SeverityScale" type="string"></slot>
<slot name="polarity" type="string">POSITIVE</slot>
<slot name="DocType" type="string"></slot>
<slot name="PatientID" type="int">0</slot>
<slot name="DateObject" type="record"/>
<slot name="enddate" type="date">
<date day="14" month="6" year="2005"/>
</slot>
<slot name="_score_enddate" type="string"></slot>
<slot name="startdate" type="date">
<date day="14" month="6" year="2005"/>
</slot>
<slot name="_score_startdate" type="string"></slot>
<slot name="Patient" type="string">PATIENT</slot>
<slot name="_score_Patient" type="string"></slot>
<slot name="_keyref" type="record"/>
<slot name="_score" type="string"></slot>
<slot name="_type" type="string"></slot>
</record>
<record id="1" template="HealthStatusRecord">
<slot name="ScoreType" type="string">HealthStatusRecord</slot>
<slot name="_score_ScoreType" type="string"></slot>
<slot name="source" type="string">C:\i2b2 eval\Subsets\Test\152.txt</slot>
```

```
<slot name="_score_source" type="string"></slot>
<slot name="region" type="region">
<region end="2917" start="2915">CP</region>
</slot>
<slot name="_score_region" type="string"></slot>
<slot name="rule" type="string">HealthStatusItemPkg/0</slot>
<slot name="ConceptName" type="string">CHEST PAIN UNSPECIFIED</slot>
<slot name="_score_ConceptName" type="string"></slot>
<slot name="SemanticType" type="string">Sign or Symptom</slot>
<slot name="BodyLocations" type="string">CHEST</slot>
<slot name="_score_BodyLocations" type="string"></slot>
<slot name="SeverityStrings" type="string">INTERMITTENT</slot>
<slot name="UMLS_CUI" type="string">C1535568</slot>
<slot name="DaysBeforeDeath" type="int">0</slot>
<slot name="PAIN" type="string">Y</slot>
<slot name="MaxPain" type="int">1</slot>
<slot name="SeverityScale" type="int">1</slot>
<slot name="_score_SeverityScale" type="string"></slot>
<slot name="polarity" type="string">POSITIVE</slot>
<slot name="DocType" type="string"></slot>
<slot name="PatientID" type="int">0</slot>
<slot name="DateObject" type="record"/>
<slot name="enddate" type="date">
<date day="15" month="6" year="2005"/>
</slot>
<slot name="_score_enddate" type="string"></slot>
```

```
<slot name="startdate" type="date">
<date day="12" month="6" year="2005"/>
</slot>
<slot name="_score_startdate" type="string"></slot>
<slot name="Patient" type="string">PATIENT</slot>
<slot name="_score_Patient" type="string"></slot>
<slot name="_keyref" type="record"/>
<slot name="_score" type="string"></slot>
<slot name="_type" type="string"></slot>
</record>
<record id="2" template="HealthStatusRecord">
<slot name="ScoreType" type="string">HealthStatusRecord</slot>
<slot name="_score_ScoreType" type="string"></slot>
<slot name="source" type="string">C:\i2b2 eval\Subsets\Test\152.txt</slot>
<slot name="_score_source" type="string"></slot>
<slot name="region" type="region">
<region end="2931" start="2927">pain</region>
</slot>
<slot name="_score_region" type="string"></slot>
<slot name="rule" type="string">HealthStatusItemPkg/0</slot>
<slot name="ConceptName" type="string">PAIN</slot>
<slot name="_score_ConceptName" type="string"></slot>
<slot name="SemanticType" type="string">Sign or Symptom</slot>
<slot name="BodyLocations" type="string"></slot>
<slot name="_score_BodyLocations" type="string"></slot>
<slot name="SeverityStrings" type="string"></slot>
```

```
<slot name="UMLS_CUI" type="string">C0030193</slot>
<slot name="DaysBeforeDeath" type="int">0</slot>
<slot name="PAIN" type="string">Y</slot>
<slot name="MaxPain" type="int">1</slot>
<slot name="SeverityScale" type="int">1</slot>
<slot name="_score_SeverityScale" type="string"></slot>
<slot name="polarity" type="string">POSITIVE</slot>
<slot name="DocType" type="string"></slot>
<slot name="PatientID" type="int">0</slot>
<slot name="DateObject" type="record"/>
<slot name="enddate" type="date">
<date day="15" month="6" year="2005"/>
</slot>
<slot name="_score_enddate" type="string"></slot>
<slot name="startdate" type="date">
<date day="12" month="6" year="2005"/>
</slot>
<slot name="_score_startdate" type="string"></slot>
<slot name="Patient" type="string">PATIENT</slot>
<slot name="_score_Patient" type="string"></slot>
<slot name="_keyref" type="record"/>
<slot name="_score" type="string"></slot>
<slot name="_type" type="string"></slot>
</record>
</records>
</infStore>
```

```
<?xml version="1.0" encoding="UTF-8"?>
<infStore>
<records>
<record id="0" template="HealthStatusRecord">
<slot name="ScoreType" type="string">HealthStatusRecord</slot>
<slot name="_score_ScoreType" type="string"></slot>
<slot name="source" type="string">C:\i2b2 eval\Subsets\Test\18.txt</slot>
<slot name="_score_source" type="string"></slot>
<slot name="region" type="region">
<region end="2754" start="2750">pain</region>
</slot>
<slot name="_score_region" type="string"></slot>
<slot name="rule" type="string">HealthStatusItemPkg/0</slot>
<slot name="ConceptName" type="string">PAIN</slot>
<slot name="_score_ConceptName" type="string"></slot>
<slot name="SemanticType" type="string">Sign or Symptom</slot>
<slot name="BodyLocations" type="string">PELVIC REGION</slot>
<slot name="_score_BodyLocations" type="string"></slot>
<slot name="SeverityStrings" type="string">CONTROLLED</slot>
<slot name="UMLS_CUI" type="string">C0030193</slot>
<slot name="DaysBeforeDeath" type="int">0</slot>
<slot name="PAIN" type="string">Y</slot>
<slot name="MaxPain" type="int">2</slot>
<slot name="SeverityScale" type="int">2</slot>
<slot name="_score_SeverityScale" type="string"></slot>
<slot name="polarity" type="string">POSITIVE</slot>
```

```
<slot name="DocType" type="string"></slot>
<slot name="PatientID" type="int">0</slot>
<slot name="DateObject" type="record"/>
<slot name="enddate" type="date">
<date day="20" month="6" year="2000"/>
</slot>
<slot name="_score_enddate" type="string"></slot>
<slot name="startdate" type="date">
<date day="20" month="6" year="2000"/>
</slot>
<slot name="_score_startdate" type="string"></slot>
<slot name="Patient" type="string">PATIENT</slot>
<slot name="_score_Patient" type="string"></slot>
<slot name="_keyref" type="record"/>
<slot name="_score" type="string"></slot>
<slot name="_type" type="string"></slot>
</record>
<record id="1" template="HealthStatusRecord">
<slot name="ScoreType" type="string">HealthStatusRecord</slot>
<slot name="_score_ScoreType" type="string"></slot>
<slot name="source" type="string">C:\i2b2 eval\Subsets\Test\18.txt</slot>
<slot name="_score_source" type="string"></slot>
<slot name="region" type="region">
<region end="638" start="628">discomfort</region>
</slot>
<slot name="_score_region" type="string"></slot>
```



<slot name="rule" type="string">HealthStatusItemPkg/0</slot>  
<slot name="ConceptName" type="string">PAIN PELVIC FEMALE</slot>  
<slot name="\_score\_ConceptName" type="string"></slot>  
<slot name="SemanticType" type="string">Sign or Symptom</slot>  
<slot name="BodyLocations" type="string">PELVIC REGION</slot>  
<slot name="\_score\_BodyLocations" type="string"></slot>  
<slot name="SeverityStrings" type="string"></slot>  
<slot name="UMLS\_CUI" type="string">C0848203</slot>  
<slot name="DaysBeforeDeath" type="int">0</slot>  
<slot name="PAIN" type="string">Y</slot>  
<slot name="MaxPain" type="int">2</slot>  
<slot name="SeverityScale" type="int">1</slot>  
<slot name="\_score\_SeverityScale" type="string"></slot>  
<slot name="polarity" type="string">POSITIVE</slot>  
<slot name="DocType" type="string"></slot>  
<slot name="PatientID" type="int">0</slot>  
<slot name="DateObject" type="record"/>  
<slot name="enddate" type="date">  
<date day="20" month="6" year="2000"/>  
</slot>  
<slot name="\_score\_enddate" type="string"></slot>  
<slot name="startdate" type="date">  
<date day="20" month="6" year="2000"/>  
</slot>  
<slot name="\_score\_startdate" type="string"></slot>  
<slot name="Patient" type="string">PATIENT</slot>

```
<slot name="_score_Patient" type="string"></slot>
<slot name="_keyref" type="record"/>
<slot name="_score" type="string"></slot>
<slot name="_type" type="string"></slot>
</record>
</records>
</infStore>
<?xml version="1.0" encoding="UTF-8"?>
<infStore>
<records>
<record id="0" template="HealthStatusRecord">
<slot name="ScoreType" type="string">HealthStatusRecord</slot>
<slot name="_score_ScoreType" type="string"></slot>
<slot name="source" type="string">C:\i2b2 eval\Subsets\Test\218.txt</slot>
<slot name="_score_source" type="string"></slot>
<slot name="region" type="region">
<region end="2345" start="2341">pain</region>
</slot>
<slot name="_score_region" type="string"></slot>
<slot name="rule" type="string">HealthStatusItemPkg/0</slot>
<slot name="ConceptName" type="string">PAIN</slot>
<slot name="_score_ConceptName" type="string"></slot>
<slot name="SemanticType" type="string">Sign or Symptom</slot>
<slot name="BodyLocations" type="string"></slot>
<slot name="_score_BodyLocations" type="string"></slot>
<slot name="SeverityStrings" type="string">WELL CONTROLLED</slot>
```

```
<slot name="UMLS_CUI" type="string">C0030193</slot>
<slot name="DaysBeforeDeath" type="int">0</slot>
<slot name="PAIN" type="string">Y</slot>
<slot name="MaxPain" type="int">2</slot>
<slot name="SeverityScale" type="int">2</slot>
<slot name="_score_SeverityScale" type="string"></slot>
<slot name="polarity" type="string">POSITIVE</slot>
<slot name="DocType" type="string"></slot>
<slot name="PatientID" type="int">0</slot>
<slot name="DateObject" type="record"/>
<slot name="enddate" type="date">
<date day="16" month="12" year="2005"/>
</slot>
<slot name="_score_enddate" type="string"></slot>
<slot name="startdate" type="date">
<date day="16" month="12" year="2005"/>
</slot>
<slot name="_score_startdate" type="string"></slot>
<slot name="Patient" type="string">PATIENT</slot>
<slot name="_score_Patient" type="string"></slot>
<slot name="_keyref" type="record"/>
<slot name="_score" type="string"></slot>
<slot name="_type" type="string"></slot>
</record>
</records>
</infStore>
```

```
<?xml version="1.0" encoding="UTF-8"?>
<infStore>
<records>
<record id="0" template="HealthStatusRecord">
<slot name="ScoreType" type="string">HealthStatusRecord</slot>
<slot name="_score_ScoreType" type="string"></slot>
<slot name="source" type="string">C:\i2b2 eval\Subsets\Test\235.txt</slot>
<slot name="_score_source" type="string"></slot>
<slot name="region" type="region">
<region end="3675" start="3668">burning</region>
</slot>
<slot name="_score_region" type="string"></slot>
<slot name="rule" type="string">HealthStatusItemPkg/0</slot>
<slot name="ConceptName" type="string">CHEST PAIN UNSPECIFIED</slot>
<slot name="_score_ConceptName" type="string"></slot>
<slot name="SemanticType" type="string">Sign or Symptom</slot>
<slot name="BodyLocations" type="string">CHEST</slot>
<slot name="_score_BodyLocations" type="string"></slot>
<slot name="SeverityStrings" type="string"></slot>
<slot name="UMLS_CUI" type="string">C1535568</slot>
<slot name="DaysBeforeDeath" type="int">0</slot>
<slot name="PAIN" type="string">Y</slot>
<slot name="MaxPain" type="int">1</slot>
<slot name="SeverityScale" type="int">1</slot>
<slot name="_score_SeverityScale" type="string"></slot>
<slot name="polarity" type="string">POSITIVE</slot>
```

```
<slot name="DocType" type="string"></slot>
<slot name="PatientID" type="int">0</slot>
<slot name="DateObject" type="record"/>
<slot name="enddate" type="date">
<date day="26" month="5" year="2005"/>
</slot>
<slot name="_score_enddate" type="string"></slot>
<slot name="startdate" type="date">
<date day="26" month="5" year="2005"/>
</slot>
<slot name="_score_startdate" type="string"></slot>
<slot name="Patient" type="string">PATIENT</slot>
<slot name="_score_Patient" type="string"></slot>
<slot name="_keyref" type="record"/>
<slot name="_score" type="string"></slot>
<slot name="_type" type="string"></slot>
</record>
<record id="1" template="HealthStatusRecord">
<slot name="ScoreType" type="string">HealthStatusRecord</slot>
<slot name="_score_ScoreType" type="string"></slot>
<slot name="source" type="string">C:\i2b2 eval\Subsets\Test\235.txt</slot>
<slot name="_score_source" type="string"></slot>
<slot name="region" type="region">
<region end="1665" start="1655">Chest Pain</region>
</slot>
<slot name="_score_region" type="string"></slot>
```

<slot name="rule" type="string">HealthStatusItemPkg/0</slot>  
<slot name="ConceptName" type="string">CHEST PAIN UNSPECIFIED</slot>  
<slot name="\_score\_ConceptName" type="string"></slot>  
<slot name="SemanticType" type="string">Sign or Symptom</slot>  
<slot name="BodyLocations" type="string">CHEST</slot>  
<slot name="\_score\_BodyLocations" type="string"></slot>  
<slot name="SeverityStrings" type="string"></slot>  
<slot name="UMLS\_CUI" type="string">C1535568</slot>  
<slot name="DaysBeforeDeath" type="int">0</slot>  
<slot name="PAIN" type="string">Y</slot>  
<slot name="MaxPain" type="int">1</slot>  
<slot name="SeverityScale" type="int">1</slot>  
<slot name="\_score\_SeverityScale" type="string"></slot>  
<slot name="polarity" type="string">POSITIVE</slot>  
<slot name="DocType" type="string"></slot>  
<slot name="PatientID" type="int">0</slot>  
<slot name="DateObject" type="record"/>  
<slot name="enddate" type="date">  
<date day="26" month="5" year="2005"/>  
</slot>  
<slot name="\_score\_enddate" type="string"></slot>  
<slot name="startdate" type="date">  
<date day="26" month="5" year="2005"/>  
</slot>  
<slot name="\_score\_startdate" type="string"></slot>  
<slot name="Patient" type="string">PATIENT</slot>

```
<slot name="_score_Patient" type="string"></slot>
<slot name="_keyref" type="record"/>
<slot name="_score" type="string"></slot>
<slot name="_type" type="string"></slot>
</record>
<record id="2" template="HealthStatusRecord">
<slot name="ScoreType" type="string">HealthStatusRecord</slot>
<slot name="_score_ScoreType" type="string"></slot>
<slot name="source" type="string">C:\i2b2 eval\Subsets\Test\235.txt</slot>
<slot name="_score_source" type="string"></slot>
<slot name="region" type="region">
<region end="2376" start="2366">chest pain</region>
</slot>
<slot name="_score_region" type="string"></slot>
<slot name="rule" type="string">HealthStatusItemPkg/0</slot>
<slot name="ConceptName" type="string">CHEST PAIN UNSPECIFIED</slot>
<slot name="_score_ConceptName" type="string"></slot>
<slot name="SemanticType" type="string">Sign or Symptom</slot>
<slot name="BodyLocations" type="string">CHEST</slot>
<slot name="_score_BodyLocations" type="string"></slot>
<slot name="SeverityStrings" type="string">BURNING</slot>
<slot name="UMLS_CUI" type="string">C1535568</slot>
<slot name="DaysBeforeDeath" type="int">0</slot>
<slot name="PAIN" type="string">Y</slot>
<slot name="MaxPain" type="int">1</slot>
<slot name="SeverityScale" type="int">1</slot>
```

```
<slot name="_score_SeverityScale" type="string"></slot>
<slot name="polarity" type="string">POSITIVE</slot>
<slot name="DocType" type="string"></slot>
<slot name="PatientID" type="int">0</slot>
<slot name="DateObject" type="record"/>
<slot name="enddate" type="date">
<date day="25" month="5" year="2005"/>
</slot>
<slot name="_score_enddate" type="string"></slot>
<slot name="startdate" type="date">
<date day="25" month="5" year="2005"/>
</slot>
<slot name="_score_startdate" type="string"></slot>
<slot name="Patient" type="string">PATIENT</slot>
<slot name="_score_Patient" type="string"></slot>
<slot name="_keyref" type="record"/>
<slot name="_score" type="string"></slot>
<slot name="_type" type="string"></slot>
</record>
<record id="3" template="HealthStatusRecord">
<slot name="ScoreType" type="string">HealthStatusRecord</slot>
<slot name="_score_ScoreType" type="string"></slot>
<slot name="source" type="string">C:\i2b2 eval\Subsets\Test\235.txt</slot>
<slot name="_score_source" type="string"></slot>
<slot name="region" type="region">
<region end="2498" start="2491">burning</region>
```



```
</slot>
<slot name="_score_region" type="string"></slot>
<slot name="rule" type="string">HealthStatusItemPkg/0</slot>
<slot name="ConceptName" type="string">BURNING PAINS</slot>
<slot name="_score_ConceptName" type="string"></slot>
<slot name="SemanticType" type="string">Sign or Symptom</slot>
<slot name="BodyLocations" type="string">CHEST</slot>
<slot name="_score_BodyLocations" type="string"></slot>
<slot name="SeverityStrings" type="string"></slot>
<slot name="UMLS_CUI" type="string">C0234230</slot>
<slot name="DaysBeforeDeath" type="int">0</slot>
<slot name="PAIN" type="string">Y</slot>
<slot name="MaxPain" type="int">1</slot>
<slot name="SeverityScale" type="int">1</slot>
<slot name="_score_SeverityScale" type="string"></slot>
<slot name="polarity" type="string">POSITIVE</slot>
<slot name="DocType" type="string"></slot>
<slot name="PatientID" type="int">0</slot>
<slot name="DateObject" type="record"/>
<slot name="enddate" type="date">
<date day="26" month="5" year="2005"/>
</slot>
<slot name="_score_enddate" type="string"></slot>
<slot name="startdate" type="date">
<date day="26" month="5" year="2005"/>
</slot>
```

```
<slot name="_score_startdate" type="string"></slot>
<slot name="Patient" type="string">PATIENT</slot>
<slot name="_score_Patient" type="string"></slot>
<slot name="_keyref" type="record"/>
<slot name="_score" type="string"></slot>
<slot name="_type" type="string"></slot>
</record>
<record id="4" template="HealthStatusRecord">
<slot name="ScoreType" type="string">HealthStatusRecord</slot>
<slot name="_score_ScoreType" type="string"></slot>
<slot name="source" type="string">C:\i2b2 eval\Subsets\Test\235.txt</slot>
<slot name="_score_source" type="string"></slot>
<slot name="region" type="region">
<region end="2738" start="2734">pain</region>
</slot>
<slot name="_score_region" type="string"></slot>
<slot name="rule" type="string">HealthStatusItemPkg/0</slot>
<slot name="ConceptName" type="string">PAIN</slot>
<slot name="_score_ConceptName" type="string"></slot>
<slot name="SemanticType" type="string">Sign or Symptom</slot>
<slot name="BodyLocations" type="string">CHEST</slot>
<slot name="_score_BodyLocations" type="string"></slot>
<slot name="SeverityStrings" type="string"></slot>
<slot name="UMLS_CUI" type="string">C0030193</slot>
<slot name="DaysBeforeDeath" type="int">0</slot>
<slot name="PAIN" type="string">Y</slot>
```

```
<slot name="MaxPain" type="int">1</slot>
<slot name="SeverityScale" type="int">1</slot>
<slot name="_score_SeverityScale" type="string"></slot>
<slot name="polarity" type="string">POSITIVE</slot>
<slot name="DocType" type="string"></slot>
<slot name="PatientID" type="int">0</slot>
<slot name="DateObject" type="record"/>
<slot name="enddate" type="date">
<date day="17" month="2" year="2005"/>
</slot>
<slot name="_score_enddate" type="string"></slot>
<slot name="startdate" type="date">
<date day="17" month="2" year="2005"/>
</slot>
<slot name="_score_startdate" type="string"></slot>
<slot name="Patient" type="string">PATIENT</slot>
<slot name="_score_Patient" type="string"></slot>
<slot name="_keyref" type="record"/>
<slot name="_score" type="string"></slot>
<slot name="_type" type="string"></slot>
</record>
<record id="5" template="HealthStatusRecord">
<slot name="ScoreType" type="string">HealthStatusRecord</slot>
<slot name="_score_ScoreType" type="string"></slot>
<slot name="source" type="string">C:\i2b2 eval\Subsets\Test\235.txt</slot>
<slot name="_score_source" type="string"></slot>
```

```
<slot name="region" type="region">
<region end="3353" start="3343">tenderness</region>
</slot>
<slot name="_score_region" type="string"></slot>
<slot name="rule" type="string">HealthStatusItemPkg/0</slot>
<slot name="ConceptName" type="string">CHEST PAIN UNSPECIFIED</slot>
<slot name="_score_ConceptName" type="string"></slot>
<slot name="SemanticType" type="string">Sign or Symptom</slot>
<slot name="BodyLocations" type="string">CHEST</slot>
<slot name="_score_BodyLocations" type="string"></slot>
<slot name="SeverityStrings" type="string">NO</slot>
<slot name="UMLS_CUI" type="string">C1535568</slot>
<slot name="DaysBeforeDeath" type="int">0</slot>
<slot name="PAIN" type="string">Y</slot>
<slot name="MaxPain" type="int">1</slot>
<slot name="SeverityScale" type="int">0</slot>
<slot name="_score_SeverityScale" type="string"></slot>
<slot name="polarity" type="string">POSITIVE</slot>
<slot name="DocType" type="string"></slot>
<slot name="PatientID" type="int">0</slot>
<slot name="DateObject" type="record"/>
<slot name="enddate" type="date">
<date day="26" month="5" year="2005"/>
</slot>
<slot name="_score_enddate" type="string"></slot>
<slot name="startdate" type="date">
```

```
<date day="26" month="5" year="2005"/>
</slot>
<slot name="_score_startdate" type="string"></slot>
<slot name="Patient" type="string">PATIENT</slot>
<slot name="_score_Patient" type="string"></slot>
<slot name="_keyref" type="record"/>
<slot name="_score" type="string"></slot>
<slot name="_type" type="string"></slot>
</record>
<record id="6" template="HealthStatusRecord">
<slot name="ScoreType" type="string">HealthStatusRecord</slot>
<slot name="_score_ScoreType" type="string"></slot>
<slot name="source" type="string">C:\i2b2 eval\Subsets\Test\235.txt</slot>
<slot name="_score_source" type="string"></slot>
<slot name="region" type="region">
<region end="2846" start="2842">pain</region>
</slot>
<slot name="_score_region" type="string"></slot>
<slot name="rule" type="string">HealthStatusItemPkg/0</slot>
<slot name="ConceptName" type="string">PAIN</slot>
<slot name="_score_ConceptName" type="string"></slot>
<slot name="SemanticType" type="string">Sign or Symptom</slot>
<slot name="BodyLocations" type="string">CHEST</slot>
<slot name="_score_BodyLocations" type="string"></slot>
<slot name="SeverityStrings" type="string"></slot>
<slot name="UMLS_CUI" type="string">C0030193</slot>
```

```
<slot name="DaysBeforeDeath" type="int">0</slot>
<slot name="PAIN" type="string">Y</slot>
<slot name="MaxPain" type="int">1</slot>
<slot name="SeverityScale" type="int">1</slot>
<slot name="_score_SeverityScale" type="string"></slot>
<slot name="polarity" type="string">POSITIVE</slot>
<slot name="DocType" type="string"></slot>
<slot name="PatientID" type="int">0</slot>
<slot name="DateObject" type="record"/>
<slot name="enddate" type="date">
<date day="26" month="5" year="2005"/>
</slot>
<slot name="_score_enddate" type="string"></slot>
<slot name="startdate" type="date">
<date day="26" month="5" year="2005"/>
</slot>
<slot name="_score_startdate" type="string"></slot>
<slot name="Patient" type="string">PATIENT</slot>
<slot name="_score_Patient" type="string"></slot>
<slot name="_keyref" type="record"/>
<slot name="_score" type="string"></slot>
<slot name="_type" type="string"></slot>
</record>
<record id="7" template="HealthStatusRecord">
<slot name="ScoreType" type="string">HealthStatusRecord</slot>
<slot name="_score_ScoreType" type="string"></slot>
```

<slot name="source" type="string">C:\i2b2 eval\Subsets\Test\235.txt</slot>  
<slot name="\_score\_source" type="string"></slot>  
<slot name="region" type="region">  
<region end="2953" start="2951">CP</region>  
</slot>  
<slot name="\_score\_region" type="string"></slot>  
<slot name="rule" type="string">HealthStatusItemPkg/0</slot>  
<slot name="ConceptName" type="string">CHEST PAIN UNSPECIFIED</slot>  
<slot name="\_score\_ConceptName" type="string"></slot>  
<slot name="SemanticType" type="string">Sign or Symptom</slot>  
<slot name="BodyLocations" type="string">CHEST</slot>  
<slot name="\_score\_BodyLocations" type="string"></slot>  
<slot name="SeverityStrings" type="string"></slot>  
<slot name="UMLS\_CUI" type="string">C1535568</slot>  
<slot name="DaysBeforeDeath" type="int">0</slot>  
<slot name="PAIN" type="string">Y</slot>  
<slot name="MaxPain" type="int">1</slot>  
<slot name="SeverityScale" type="int">1</slot>  
<slot name="\_score\_SeverityScale" type="string"></slot>  
<slot name="polarity" type="string">POSITIVE</slot>  
<slot name="DocType" type="string"></slot>  
<slot name="PatientID" type="int">0</slot>  
<slot name="DateObject" type="record"/>  
<slot name="enddate" type="date">  
<date day="26" month="5" year="2005"/>  
</slot>

```
<slot name="_score_enddate" type="string"></slot>
<slot name="startdate" type="date">
<date day="26" month="5" year="2005"/>
</slot>
<slot name="_score_startdate" type="string"></slot>
<slot name="Patient" type="string">PATIENT</slot>
<slot name="_score_Patient" type="string"></slot>
<slot name="_keyref" type="record"/>
<slot name="_score" type="string"></slot>
<slot name="_type" type="string"></slot>
</record>
<record id="8" template="HealthStatusRecord">
<slot name="ScoreType" type="string">HealthStatusRecord</slot>
<slot name="_score_ScoreType" type="string"></slot>
<slot name="source" type="string">C:\i2b2 eval\Subsets\Test\235.txt</slot>
<slot name="_score_source" type="string"></slot>
<slot name="region" type="region">
<region end="2963" start="2956">burning</region>
</slot>
<slot name="_score_region" type="string"></slot>
<slot name="rule" type="string">HealthStatusItemPkg/0</slot>
<slot name="ConceptName" type="string">BURNING PAINS</slot>
<slot name="_score_ConceptName" type="string"></slot>
<slot name="SemanticType" type="string">Sign or Symptom</slot>
<slot name="BodyLocations" type="string">CHEST</slot>
<slot name="_score_BodyLocations" type="string"></slot>
```



```
<slot name="SeverityStrings" type="string"></slot>
<slot name="UMLS_CUI" type="string">C0234230</slot>
<slot name="DaysBeforeDeath" type="int">0</slot>
<slot name="PAIN" type="string">Y</slot>
<slot name="MaxPain" type="int">1</slot>
<slot name="SeverityScale" type="int">1</slot>
<slot name="_score_SeverityScale" type="string"></slot>
<slot name="polarity" type="string">POSITIVE</slot>
<slot name="DocType" type="string"></slot>
<slot name="PatientID" type="int">0</slot>
<slot name="DateObject" type="record"/>
<slot name="enddate" type="date">
<date day="26" month="5" year="2005"/>
</slot>
<slot name="_score_enddate" type="string"></slot>
<slot name="startdate" type="date">
<date day="26" month="5" year="2005"/>
</slot>
<slot name="_score_startdate" type="string"></slot>
<slot name="Patient" type="string">PATIENT</slot>
<slot name="_score_Patient" type="string"></slot>
<slot name="_keyref" type="record"/>
<slot name="_score" type="string"></slot>
<slot name="_type" type="string"></slot>
</record>
<record id="9" template="HealthStatusRecord">
```

<slot name="ScoreType" type="string">HealthStatusRecord</slot>  
<slot name="\_score\_ScoreType" type="string"></slot>  
<slot name="source" type="string">C:\i2b2 eval\Subsets\Test\235.txt</slot>  
<slot name="\_score\_source" type="string"></slot>  
<slot name="region" type="region">  
<region end="2691" start="2687">pain</region>  
</slot>  
<slot name="\_score\_region" type="string"></slot>  
<slot name="rule" type="string">HealthStatusItemPkg/0</slot>  
<slot name="ConceptName" type="string">PAIN</slot>  
<slot name="\_score\_ConceptName" type="string"></slot>  
<slot name="SemanticType" type="string">Sign or Symptom</slot>  
<slot name="BodyLocations" type="string">CHEST</slot>  
<slot name="\_score\_BodyLocations" type="string"></slot>  
<slot name="SeverityStrings" type="string"></slot>  
<slot name="UMLS\_CUI" type="string">C0030193</slot>  
<slot name="DaysBeforeDeath" type="int">0</slot>  
<slot name="PAIN" type="string">Y</slot>  
<slot name="MaxPain" type="int">1</slot>  
<slot name="SeverityScale" type="int">1</slot>  
<slot name="\_score\_SeverityScale" type="string"></slot>  
<slot name="polarity" type="string">POSITIVE</slot>  
<slot name="DocType" type="string"></slot>  
<slot name="PatientID" type="int">0</slot>  
<slot name="DateObject" type="record"/>  
<slot name="enddate" type="date">

```
<date day="26" month="5" year="2005"/>
</slot>
<slot name="_score_enddate" type="string"></slot>
<slot name="startdate" type="date">
<date day="26" month="5" year="2005"/>
</slot>
<slot name="_score_startdate" type="string"></slot>
<slot name="Patient" type="string">PATIENT</slot>
<slot name="_score_Patient" type="string"></slot>
<slot name="_keyref" type="record"/>
<slot name="_score" type="string"></slot>
<slot name="_type" type="string"></slot>
</record>
</records>
</infStore>
<?xml version="1.0" encoding="UTF-8"?>
<infStore>
<records>
<record id="0" template="HealthStatusRecord">
<slot name="ScoreType" type="string">HealthStatusRecord</slot>
<slot name="_score_ScoreType" type="string"></slot>
<slot name="source" type="string">C:\i2b2 eval\Subsets\Test\239.txt</slot>
<slot name="_score_source" type="string"></slot>
<slot name="region" type="region">
<region end="3615" start="3605">tenderness</region>
</slot>
```

<slot name="\_score\_region" type="string"></slot>  
<slot name="rule" type="string">HealthStatusItemPkg/0</slot>  
<slot name="ConceptName" type="string">TENDERNESS</slot>  
<slot name="\_score\_ConceptName" type="string"></slot>  
<slot name="SemanticType" type="string">Sign or Symptom</slot>  
<slot name="BodyLocations" type="string">CHEST</slot>  
<slot name="\_score\_BodyLocations" type="string"></slot>  
<slot name="SeverityStrings" type="string">NO</slot>  
<slot name="UMLS\_CUI" type="string">C0234233</slot>  
<slot name="DaysBeforeDeath" type="int">0</slot>  
<slot name="PAIN" type="string">Y</slot>  
<slot name="MaxPain" type="int">1</slot>  
<slot name="SeverityScale" type="int">0</slot>  
<slot name="\_score\_SeverityScale" type="string"></slot>  
<slot name="polarity" type="string">POSITIVE</slot>  
<slot name="DocType" type="string"></slot>  
<slot name="PatientID" type="int">0</slot>  
<slot name="DateObject" type="record"/>  
<slot name="enddate" type="date">  
<date day="29" month="3" year="2005"/>  
</slot>  
<slot name="\_score\_enddate" type="string"></slot>  
<slot name="startdate" type="date">  
<date day="29" month="3" year="2005"/>  
</slot>  
<slot name="\_score\_startdate" type="string"></slot>

```
<slot name="Patient" type="string">PATIENT</slot>
<slot name="_score_Patient" type="string"></slot>
<slot name="_keyref" type="record"/>
<slot name="_score" type="string"></slot>
<slot name="_type" type="string"></slot>
</record>
<record id="1" template="HealthStatusRecord">
<slot name="ScoreType" type="string">HealthStatusRecord</slot>
<slot name="_score_ScoreType" type="string"></slot>
<slot name="source" type="string">C:\i2b2 eval\Subsets\Test\239.txt</slot>
<slot name="_score_source" type="string"></slot>
<slot name="region" type="region">
<region end="1188" start="1179">back pain</region>
</slot>
<slot name="_score_region" type="string"></slot>
<slot name="rule" type="string">HealthStatusItemPkg/0</slot>
<slot name="ConceptName" type="string">BACK PAINS</slot>
<slot name="_score_ConceptName" type="string"></slot>
<slot name="SemanticType" type="string">Sign or Symptom</slot>
<slot name="BodyLocations" type="string">BACK</slot>
<slot name="_score_BodyLocations" type="string"></slot>
<slot name="SeverityStrings" type="string"></slot>
<slot name="UMLS_CUI" type="string">C0004604</slot>
<slot name="DaysBeforeDeath" type="int">0</slot>
<slot name="PAIN" type="string">Y</slot>
<slot name="MaxPain" type="int">1</slot>
```

```
<slot name="SeverityScale" type="int">1</slot>
<slot name="_score_SeverityScale" type="string"></slot>
<slot name="polarity" type="string">POSITIVE</slot>
<slot name="DocType" type="string"></slot>
<slot name="PatientID" type="int">0</slot>
<slot name="DateObject" type="record"/>
<slot name="enddate" type="date">
<date day="30" month="9" year="2004"/>
</slot>
<slot name="_score_enddate" type="string"></slot>
<slot name="startdate" type="date">
<date day="1" month="9" year="2004"/>
</slot>
<slot name="_score_startdate" type="string"></slot>
<slot name="Patient" type="string">PATIENT</slot>
<slot name="_score_Patient" type="string"></slot>
<slot name="_keyref" type="record"/>
<slot name="_score" type="string"></slot>
<slot name="_type" type="string"></slot>
</record>
</records>
</infStore>
<?xml version="1.0" encoding="UTF-8"?>
<infStore>
<records>
<record id="0" template="HealthStatusRecord">
```

<slot name="ScoreType" type="string">HealthStatusRecord</slot>  
<slot name="\_score\_ScoreType" type="string"></slot>  
<slot name="source" type="string">C:\i2b2 eval\Subsets\Test\260.txt</slot>  
<slot name="\_score\_source" type="string"></slot>  
<slot name="region" type="region">  
<region end="4177" start="4173">pain</region>  
</slot>  
<slot name="\_score\_region" type="string"></slot>  
<slot name="rule" type="string">HealthStatusItemPkg/0</slot>  
<slot name="ConceptName" type="string">PAIN</slot>  
<slot name="\_score\_ConceptName" type="string"></slot>  
<slot name="SemanticType" type="string">Sign or Symptom</slot>  
<slot name="BodyLocations" type="string"></slot>  
<slot name="\_score\_BodyLocations" type="string"></slot>  
<slot name="SeverityStrings" type="string">CONTROLLED</slot>  
<slot name="UMLS\_CUI" type="string">C0030193</slot>  
<slot name="DaysBeforeDeath" type="int">0</slot>  
<slot name="PAIN" type="string">Y</slot>  
<slot name="MaxPain" type="int">2</slot>  
<slot name="SeverityScale" type="int">2</slot>  
<slot name="\_score\_SeverityScale" type="string"></slot>  
<slot name="polarity" type="string">POSITIVE</slot>  
<slot name="DocType" type="string"></slot>  
<slot name="PatientID" type="int">0</slot>  
<slot name="DateObject" type="record"/>  
<slot name="enddate" type="date">

```
<date day="1" month="8" year="2006"/>
</slot>
<slot name="_score_enddate" type="string"></slot>
<slot name="startdate" type="date">
<date day="1" month="8" year="2006"/>
</slot>
<slot name="_score_startdate" type="string"></slot>
<slot name="Patient" type="string">PATIENT</slot>
<slot name="_score_Patient" type="string"></slot>
<slot name="_keyref" type="record"/>
<slot name="_score" type="string"></slot>
<slot name="_type" type="string"></slot>
</record>
<record id="1" template="HealthStatusRecord">
<slot name="ScoreType" type="string">HealthStatusRecord</slot>
<slot name="_score_ScoreType" type="string"></slot>
<slot name="source" type="string">C:\i2b2 eval\Subsets\Test\260.txt</slot>
<slot name="_score_source" type="string"></slot>
<slot name="region" type="region">
<region end="3819" start="3815">pain</region>
</slot>
<slot name="_score_region" type="string"></slot>
<slot name="rule" type="string">HealthStatusItemPkg/0</slot>
<slot name="ConceptName" type="string">PAIN</slot>
<slot name="_score_ConceptName" type="string"></slot>
<slot name="SemanticType" type="string">Sign or Symptom</slot>
```



<slot name="BodyLocations" type="string">STRUCTURE OF POSTERIOR CEREBRAL ARTERY</slot>

<slot name="\_score\_BodyLocations" type="string"></slot>

<slot name="SeverityStrings" type="string">WELL CONTROLLED</slot>

<slot name="UMLS\_CUI" type="string">C0030193</slot>

<slot name="DaysBeforeDeath" type="int">0</slot>

<slot name="PAIN" type="string">Y</slot>

<slot name="MaxPain" type="int">2</slot>

<slot name="SeverityScale" type="int">2</slot>

<slot name="\_score\_SeverityScale" type="string"></slot>

<slot name="polarity" type="string">POSITIVE</slot>

<slot name="DocType" type="string"></slot>

<slot name="PatientID" type="int">0</slot>

<slot name="DateObject" type="record"/>

<slot name="enddate" type="date">

<date day="30" month="7" year="2006"/>

</slot>

<slot name="\_score\_enddate" type="string"></slot>

<slot name="startdate" type="date">

<date day="30" month="7" year="2006"/>

</slot>

<slot name="\_score\_startdate" type="string"></slot>

<slot name="Patient" type="string">PATIENT</slot>

<slot name="\_score\_Patient" type="string"></slot>

<slot name="\_keyref" type="record"/>

<slot name="\_score" type="string"></slot>

<slot name="\_type" type="string"></slot>

```
</record>
<record id="2" template="HealthStatusRecord">
  <slot name="ScoreType" type="string">HealthStatusRecord</slot>
  <slot name="_score_ScoreType" type="string"></slot>
  <slot name="source" type="string">C:\i2b2 eval\Subsets\Test\260.txt</slot>
  <slot name="_score_source" type="string"></slot>
  <slot name="region" type="region">
    <region end="3105" start="3091">CVA tenderness</region>
  </slot>
  <slot name="_score_region" type="string"></slot>
  <slot name="rule" type="string">HealthStatusItemPkg/0</slot>
  <slot name="ConceptName" type="string">RENAL ANGLE TENDERNESS</slot>
  <slot name="_score_ConceptName" type="string"></slot>
  <slot name="SemanticType" type="string">Sign or Symptom</slot>
  <slot name="BodyLocations" type="string">COSTOVERTEBRAL ANGLE</slot>
  <slot name="_score_BodyLocations" type="string"></slot>
  <slot name="SeverityStrings" type="string">NO</slot>
  <slot name="UMLS_CUI" type="string">C0235634</slot>
  <slot name="DaysBeforeDeath" type="int">0</slot>
  <slot name="PAIN" type="string">Y</slot>
  <slot name="MaxPain" type="int">2</slot>
  <slot name="SeverityScale" type="int">0</slot>
  <slot name="_score_SeverityScale" type="string"></slot>
  <slot name="polarity" type="string">POSITIVE</slot>
  <slot name="DocType" type="string"></slot>
  <slot name="PatientID" type="int">0</slot>
```

```
<slot name="DateObject" type="record"/>
<slot name="enddate" type="date">
<date day="30" month="7" year="2006"/>
</slot>
<slot name="_score_enddate" type="string"></slot>
<slot name="startdate" type="date">
<date day="30" month="7" year="2006"/>
</slot>
<slot name="_score_startdate" type="string"></slot>
<slot name="Patient" type="string">PATIENT</slot>
<slot name="_score_Patient" type="string"></slot>
<slot name="_keyref" type="record"/>
<slot name="_score" type="string"></slot>
<slot name="_type" type="string"></slot>
</record>
</records>
</infStore>
<?xml version="1.0" encoding="UTF-8"?>
<infStore>
<records>
<record id="0" template="HealthStatusRecord">
<slot name="ScoreType" type="string">HealthStatusRecord</slot>
<slot name="_score_ScoreType" type="string"></slot>
<slot name="source" type="string">C:\i2b2 eval\Subsets\Test\500.txt</slot>
<slot name="_score_source" type="string"></slot>
<slot name="region" type="region">
```

```
<region end="507" start="494">low back pain</region>
</slot>
<slot name="_score_region" type="string"></slot>
<slot name="rule" type="string">HealthStatusItemPkg/0</slot>
<slot name="ConceptName" type="string">LOWER BACK PAINS</slot>
<slot name="_score_ConceptName" type="string"></slot>
<slot name="SemanticType" type="string">Sign or Symptom</slot>
<slot name="BodyLocations" type="string">LOWER BACK</slot>
<slot name="_score_BodyLocations" type="string"></slot>
<slot name="SeverityStrings" type="string"></slot>
<slot name="UMLS_CUI" type="string">C0024031</slot>
<slot name="DaysBeforeDeath" type="int">0</slot>
<slot name="PAIN" type="string">Y</slot>
<slot name="MaxPain" type="int">2</slot>
<slot name="SeverityScale" type="int">1</slot>
<slot name="_score_SeverityScale" type="string"></slot>
<slot name="polarity" type="string">POSITIVE</slot>
<slot name="DocType" type="string"></slot>
<slot name="PatientID" type="int">0</slot>
<slot name="DateObject" type="record"/>
<slot name="enddate" type="date">
<date day="16" month="11" year="2004"/>
</slot>
<slot name="_score_enddate" type="string"></slot>
<slot name="startdate" type="date">
<date day="9" month="11" year="2004"/>
```

```
</slot>
<slot name="_score_startdate" type="string"></slot>
<slot name="Patient" type="string">PATIENT</slot>
<slot name="_score_Patient" type="string"></slot>
<slot name="_keyref" type="record"/>
<slot name="_score" type="string"></slot>
<slot name="_type" type="string"></slot>
</record>
<record id="1" template="HealthStatusRecord">
<slot name="ScoreType" type="string">HealthStatusRecord</slot>
<slot name="_score_ScoreType" type="string"></slot>
<slot name="source" type="string">C:\i2b2 eval\Subsets\Test\500.txt</slot>
<slot name="_score_source" type="string"></slot>
<slot name="region" type="region">
<region end="631" start="627">pain</region>
</slot>
<slot name="_score_region" type="string"></slot>
<slot name="rule" type="string">HealthStatusItemPkg/0</slot>
<slot name="ConceptName" type="string">PAIN</slot>
<slot name="_score_ConceptName" type="string"></slot>
<slot name="SemanticType" type="string">Sign or Symptom</slot>
<slot name="BodyLocations" type="string">LOWER BACK</slot>
<slot name="_score_BodyLocations" type="string"></slot>
<slot name="SeverityStrings" type="string"></slot>
<slot name="UMLS_CUI" type="string">C0030193</slot>
<slot name="DaysBeforeDeath" type="int">0</slot>
```

```
<slot name="PAIN" type="string">Y</slot>
<slot name="MaxPain" type="int">2</slot>
<slot name="SeverityScale" type="int">1</slot>
<slot name="_score_SeverityScale" type="string"></slot>
<slot name="polarity" type="string">POSITIVE</slot>
<slot name="DocType" type="string"></slot>
<slot name="PatientID" type="int">0</slot>
<slot name="DateObject" type="record"/>
<slot name="enddate" type="date">
<date day="16" month="11" year="2004"/>
</slot>
<slot name="_score_enddate" type="string"></slot>
<slot name="startdate" type="date">
<date day="9" month="11" year="2004"/>
</slot>
<slot name="_score_startdate" type="string"></slot>
<slot name="Patient" type="string">PATIENT</slot>
<slot name="_score_Patient" type="string"></slot>
<slot name="_keyref" type="record"/>
<slot name="_score" type="string"></slot>
<slot name="_type" type="string"></slot>
</record>
<record id="2" template="HealthStatusRecord">
<slot name="ScoreType" type="string">HealthStatusRecord</slot>
<slot name="_score_ScoreType" type="string"></slot>
<slot name="source" type="string">C:\i2b2 eval\Subsets\Test\500.txt</slot>
```

```
<slot name="_score_source" type="string"></slot>
<slot name="region" type="region">
<region end="784" start="771">shooting pain</region>
</slot>
<slot name="_score_region" type="string"></slot>
<slot name="rule" type="string">HealthStatusItemPkg/0</slot>
<slot name="ConceptName" type="string">PAIN IN LEFT LEG</slot>
<slot name="_score_ConceptName" type="string"></slot>
<slot name="SemanticType" type="string">Sign or Symptom</slot>
<slot name="BodyLocations" type="string">LEFT LEG</slot>
<slot name="_score_BodyLocations" type="string"></slot>
<slot name="SeverityStrings" type="string"></slot>
<slot name="UMLS_CUI" type="string">C0564822</slot>
<slot name="DaysBeforeDeath" type="int">0</slot>
<slot name="PAIN" type="string">Y</slot>
<slot name="MaxPain" type="int">2</slot>
<slot name="SeverityScale" type="int">1</slot>
<slot name="_score_SeverityScale" type="string"></slot>
<slot name="polarity" type="string">POSITIVE</slot>
<slot name="DocType" type="string"></slot>
<slot name="PatientID" type="int">0</slot>
<slot name="DateObject" type="record"/>
<slot name="enddate" type="date">
<date day="16" month="11" year="2004"/>
</slot>
<slot name="_score_enddate" type="string"></slot>
```

```
<slot name="startdate" type="date">
<date day="9" month="11" year="2004"/>
</slot>
<slot name="_score_startdate" type="string"></slot>
<slot name="Patient" type="string">PATIENT</slot>
<slot name="_score_Patient" type="string"></slot>
<slot name="_keyref" type="record"/>
<slot name="_score" type="string"></slot>
<slot name="_type" type="string"></slot>
</record>
<record id="3" template="HealthStatusRecord">
<slot name="ScoreType" type="string">HealthStatusRecord</slot>
<slot name="_score_ScoreType" type="string"></slot>
<slot name="source" type="string">C:\i2b2 eval\Subsets\Test\500.txt</slot>
<slot name="_score_source" type="string"></slot>
<slot name="region" type="region">
<region end="2192" start="2188">pain</region>
</slot>
<slot name="_score_region" type="string"></slot>
<slot name="rule" type="string"></slot>
<slot name="ConceptName" type="string">PAIN</slot>
<slot name="_score_ConceptName" type="string"></slot>
<slot name="SemanticType" type="string"></slot>
<slot name="BodyLocations" type="string">LOWER BACK</slot>
<slot name="_score_BodyLocations" type="string"></slot>
<slot name="SeverityStrings" type="string"></slot>
```



```
<slot name="UMLS_CUI" type="string"></slot>
<slot name="DaysBeforeDeath" type="int">0</slot>
<slot name="PAIN" type="string">Y</slot>
<slot name="MaxPain" type="int">0</slot>
<slot name="SeverityScale" type="int">2</slot>
<slot name="_score_SeverityScale" type="string"></slot>
<slot name="polarity" type="string"></slot>
<slot name="DocType" type="string"></slot>
<slot name="PatientID" type="int">0</slot>
<slot name="DateObject" type="record"/>
<slot name="enddate" type="date">
<date day="18" month="11" year="2004"/>
</slot>
<slot name="_score_enddate" type="string"></slot>
<slot name="startdate" type="date">
<date day="16" month="11" year="2004"/>
</slot>
<slot name="_score_startdate" type="string"></slot>
<slot name="Patient" type="string"></slot>
<slot name="_score_Patient" type="string"></slot>
<slot name="_keyref" type="record"/>
<slot name="_score" type="string"></slot>
<slot name="_type" type="string"></slot>
</record>
<record id="4" template="HealthStatusRecord">
<slot name="ScoreType" type="string">HealthStatusRecord</slot>
```

```
<slot name="_score_ScoreType" type="string"></slot>
<slot name="source" type="string">C:\i2b2 eval\Subsets\Test\500.txt</slot>
<slot name="_score_source" type="string"></slot>
<slot name="region" type="region">
<region end="321" start="308">Low back pain</region>
</slot>
<slot name="_score_region" type="string"></slot>
<slot name="rule" type="string"></slot>
<slot name="ConceptName" type="string">LOWER BACK PAINS</slot>
<slot name="_score_ConceptName" type="string"></slot>
<slot name="SemanticType" type="string"></slot>
<slot name="BodyLocations" type="string">LOWER BACK</slot>
<slot name="_score_BodyLocations" type="string"></slot>
<slot name="SeverityStrings" type="string"></slot>
<slot name="UMLS_CUI" type="string"></slot>
<slot name="DaysBeforeDeath" type="int">0</slot>
<slot name="PAIN" type="string">Y</slot>
<slot name="MaxPain" type="int">0</slot>
<slot name="SeverityScale" type="int">1</slot>
<slot name="_score_SeverityScale" type="string"></slot>
<slot name="polarity" type="string"></slot>
<slot name="DocType" type="string"></slot>
<slot name="PatientID" type="int">0</slot>
<slot name="DateObject" type="record"/>
<slot name="enddate" type="date">
<date day="16" month="11" year="2004"/>
```

```
</slot>
<slot name="_score_enddate" type="string"></slot>
<slot name="startdate" type="date">
<date day="16" month="11" year="2004"/>
</slot>
<slot name="_score_startdate" type="string"></slot>
<slot name="Patient" type="string"></slot>
<slot name="_score_Patient" type="string"></slot>
<slot name="_keyref" type="record"/>
<slot name="_score" type="string"></slot>
<slot name="_type" type="string"></slot>
</record>
<record id="5" template="HealthStatusRecord">
<slot name="ScoreType" type="string">HealthStatusRecord</slot>
<slot name="_score_ScoreType" type="string"></slot>
<slot name="source" type="string">C:\i2b2 eval\Subsets\Test\500.txt</slot>
<slot name="_score_source" type="string"></slot>
<slot name="region" type="region">
<region end="2007" start="2003">pain</region>
</slot>
<slot name="_score_region" type="string"></slot>
<slot name="rule" type="string">HealthStatusItemPkg/0</slot>
<slot name="ConceptName" type="string">PAIN</slot>
<slot name="_score_ConceptName" type="string"></slot>
<slot name="SemanticType" type="string">Sign or Symptom</slot>
<slot name="BodyLocations" type="string">LOWER BACK</slot>
```

```
<slot name="_score_BodyLocations" type="string"></slot>
<slot name="SeverityStrings" type="string"></slot>
<slot name="UMLS_CUI" type="string">C0030193</slot>
<slot name="DaysBeforeDeath" type="int">0</slot>
<slot name="PAIN" type="string">Y</slot>
<slot name="MaxPain" type="int">2</slot>
<slot name="SeverityScale" type="int">1</slot>
<slot name="_score_SeverityScale" type="string"></slot>
<slot name="polarity" type="string">POSITIVE</slot>
<slot name="DocType" type="string"></slot>
<slot name="PatientID" type="int">0</slot>
<slot name="DateObject" type="record"/>
<slot name="enddate" type="date">
<date day="16" month="11" year="2004"/>
</slot>
<slot name="_score_enddate" type="string"></slot>
<slot name="startdate" type="date">
<date day="16" month="11" year="2004"/>
</slot>
<slot name="_score_startdate" type="string"></slot>
<slot name="Patient" type="string">PATIENT</slot>
<slot name="_score_Patient" type="string"></slot>
<slot name="_keyref" type="record"/>
<slot name="_score" type="string"></slot>
<slot name="_type" type="string"></slot>
</record>
```

```
<record id="6" template="HealthStatusRecord">
<slot name="ScoreType" type="string">HealthStatusRecord</slot>
<slot name="_score_ScoreType" type="string"></slot>
<slot name="source" type="string">C:\i2b2 eval\Subsets\Test\500.txt</slot>
<slot name="_score_source" type="string"></slot>
<slot name="region" type="region">
<region end="2091" start="2087">pain</region>
</slot>
<slot name="_score_region" type="string"></slot>
<slot name="rule" type="string">HealthStatusItemPkg/0</slot>
<slot name="ConceptName" type="string">PAIN</slot>
<slot name="_score_ConceptName" type="string"></slot>
<slot name="SemanticType" type="string">Sign or Symptom</slot>
<slot name="BodyLocations" type="string">LOWER BACK</slot>
<slot name="_score_BodyLocations" type="string"></slot>
<slot name="SeverityStrings" type="string">MANAGED</slot>
<slot name="UMLS_CUI" type="string">C0030193</slot>
<slot name="DaysBeforeDeath" type="int">0</slot>
<slot name="PAIN" type="string">Y</slot>
<slot name="MaxPain" type="int">2</slot>
<slot name="SeverityScale" type="int">2</slot>
<slot name="_score_SeverityScale" type="string"></slot>
<slot name="polarity" type="string">POSITIVE</slot>
<slot name="DocType" type="string"></slot>
<slot name="PatientID" type="int">0</slot>
<slot name="DateObject" type="record"/>
```

```
<slot name="enddate" type="date">
<date day="18" month="11" year="2004"/>
</slot>
<slot name="_score_enddate" type="string"></slot>
<slot name="startdate" type="date">
<date day="16" month="11" year="2004"/>
</slot>
<slot name="_score_startdate" type="string"></slot>
<slot name="Patient" type="string">PATIENT</slot>
<slot name="_score_Patient" type="string"></slot>
<slot name="_keyref" type="record"/>
<slot name="_score" type="string"></slot>
<slot name="_type" type="string"></slot>
</record>
<record id="7" template="HealthStatusRecord">
<slot name="ScoreType" type="string">HealthStatusRecord</slot>
<slot name="_score_ScoreType" type="string"></slot>
<slot name="source" type="string">C:\i2b2 eval\Subsets\Test\500.txt</slot>
<slot name="_score_source" type="string"></slot>
<slot name="region" type="region">
<region end="2421" start="2417">pain</region>
</slot>
<slot name="_score_region" type="string"></slot>
<slot name="rule" type="string"></slot>
<slot name="ConceptName" type="string">PAIN</slot>
<slot name="_score_ConceptName" type="string"></slot>
```

```
<slot name="SemanticType" type="string"></slot>
<slot name="BodyLocations" type="string">LOWER BACK</slot>
<slot name="_score_BodyLocations" type="string"></slot>
<slot name="SeverityStrings" type="string"></slot>
<slot name="UMLS_CUI" type="string"></slot>
<slot name="DaysBeforeDeath" type="int">0</slot>
<slot name="PAIN" type="string">Y</slot>
<slot name="MaxPain" type="int">0</slot>
<slot name="SeverityScale" type="int">2</slot>
<slot name="_score_SeverityScale" type="string"></slot>
<slot name="polarity" type="string"></slot>
<slot name="DocType" type="string"></slot>
<slot name="PatientID" type="int">0</slot>
<slot name="DateObject" type="record"/>
<slot name="enddate" type="date">
<date day="18" month="11" year="2004"/>
</slot>
<slot name="_score_enddate" type="string"></slot>
<slot name="startdate" type="date">
<date day="18" month="11" year="2004"/>
</slot>
<slot name="_score_startdate" type="string"></slot>
<slot name="Patient" type="string"></slot>
<slot name="_score_Patient" type="string"></slot>
<slot name="_keyref" type="record"/>
<slot name="_score" type="string"></slot>
```

```
<slot name="_type" type="string"></slot>
</record>
</records>
</infStore>
<?xml version="1.0" encoding="UTF-8"?>
<infStore>
<records>
<record id="0" template="HealthStatusRecord">
<slot name="ScoreType" type="string">HealthStatusRecord</slot>
<slot name="_score_ScoreType" type="string"></slot>
<slot name="source" type="string">C:\i2b2 eval\Subsets\Test\55.txt</slot>
<slot name="_score_source" type="string"></slot>
<slot name="region" type="region">
<region end="3010" start="3006">pain</region>
</slot>
<slot name="_score_region" type="string"></slot>
<slot name="rule" type="string">HealthStatusItemPkg/0</slot>
<slot name="ConceptName" type="string">ABDOMINAL PAIN</slot>
<slot name="_score_ConceptName" type="string"></slot>
<slot name="SemanticType" type="string">Sign or Symptom</slot>
<slot name="BodyLocations" type="string">ABDOMEN</slot>
<slot name="_score_BodyLocations" type="string"></slot>
<slot name="SeverityStrings" type="string"></slot>
<slot name="UMLS_CUI" type="string">C0000737</slot>
<slot name="DaysBeforeDeath" type="int">0</slot>
<slot name="PAIN" type="string">Y</slot>
```



```
<slot name="MaxPain" type="int">1</slot>
<slot name="SeverityScale" type="int">1</slot>
<slot name="_score_SeverityScale" type="string"></slot>
<slot name="polarity" type="string">POSITIVE</slot>
<slot name="DocType" type="string"></slot>
<slot name="PatientID" type="int">0</slot>
<slot name="DateObject" type="record"/>
<slot name="enddate" type="date">
<date day="8" month="6" year="2004"/>
</slot>
<slot name="_score_enddate" type="string"></slot>
<slot name="startdate" type="date">
<date day="4" month="6" year="2004"/>
</slot>
<slot name="_score_startdate" type="string"></slot>
<slot name="Patient" type="string">PATIENT</slot>
<slot name="_score_Patient" type="string"></slot>
<slot name="_keyref" type="record"/>
<slot name="_score" type="string"></slot>
<slot name="_type" type="string"></slot>
</record>
<record id="1" template="HealthStatusRecord">
<slot name="ScoreType" type="string">HealthStatusRecord</slot>
<slot name="_score_ScoreType" type="string"></slot>
<slot name="source" type="string">C:\i2b2 eval\Subsets\Test\55.txt</slot>
<slot name="_score_source" type="string"></slot>
```

```
<slot name="region" type="region">
<region end="3225" start="3221">pain</region>
</slot>
<slot name="_score_region" type="string"></slot>
<slot name="rule" type="string">HealthStatusItemPkg/0</slot>
<slot name="ConceptName" type="string">ABDOMINAL PAIN</slot>
<slot name="_score_ConceptName" type="string"></slot>
<slot name="SemanticType" type="string">Sign or Symptom</slot>
<slot name="BodyLocations" type="string">ABDOMEN</slot>
<slot name="_score_BodyLocations" type="string"></slot>
<slot name="SeverityStrings" type="string"></slot>
<slot name="UMLS_CUI" type="string">C0000737</slot>
<slot name="DaysBeforeDeath" type="int">0</slot>
<slot name="PAIN" type="string">Y</slot>
<slot name="MaxPain" type="int">1</slot>
<slot name="SeverityScale" type="int">1</slot>
<slot name="_score_SeverityScale" type="string"></slot>
<slot name="polarity" type="string">POSITIVE</slot>
<slot name="DocType" type="string"></slot>
<slot name="PatientID" type="int">0</slot>
<slot name="DateObject" type="record"/>
<slot name="enddate" type="date">
<date day="8" month="6" year="2004"/>
</slot>
<slot name="_score_enddate" type="string"></slot>
<slot name="startdate" type="date">
```

```
<date day="30" month="5" year="2004"/>
</slot>
<slot name="_score_startdate" type="string"></slot>
<slot name="Patient" type="string">PATIENT</slot>
<slot name="_score_Patient" type="string"></slot>
<slot name="_keyref" type="record"/>
<slot name="_score" type="string"></slot>
<slot name="_type" type="string"></slot>
</record>
<record id="2" template="HealthStatusRecord">
<slot name="ScoreType" type="string">HealthStatusRecord</slot>
<slot name="_score_ScoreType" type="string"></slot>
<slot name="source" type="string">C:\i2b2 eval\Subsets\Test\55.txt</slot>
<slot name="_score_source" type="string"></slot>
<slot name="region" type="region">
<region end="3850" start="3846">pain</region>
</slot>
<slot name="_score_region" type="string"></slot>
<slot name="rule" type="string"></slot>
<slot name="ConceptName" type="string">PAIN</slot>
<slot name="_score_ConceptName" type="string"></slot>
<slot name="SemanticType" type="string"></slot>
<slot name="BodyLocations" type="string">ABDOMEN</slot>
<slot name="_score_BodyLocations" type="string"></slot>
<slot name="SeverityStrings" type="string"></slot>
<slot name="UMLS_CUI" type="string"></slot>
```

```
<slot name="DaysBeforeDeath" type="int">0</slot>
<slot name="PAIN" type="string">Y</slot>
<slot name="MaxPain" type="int">0</slot>
<slot name="SeverityScale" type="int">2</slot>
<slot name="_score_SeverityScale" type="string"></slot>
<slot name="polarity" type="string"></slot>
<slot name="DocType" type="string"></slot>
<slot name="PatientID" type="int">0</slot>
<slot name="DateObject" type="record"/>
<slot name="enddate" type="date">
<date day="8" month="6" year="2004"/>
</slot>
<slot name="_score_enddate" type="string"></slot>
<slot name="startdate" type="date">
<date day="4" month="6" year="2004"/>
</slot>
<slot name="_score_startdate" type="string"></slot>
<slot name="Patient" type="string"></slot>
<slot name="_score_Patient" type="string"></slot>
<slot name="_keyref" type="record"/>
<slot name="_score" type="string"></slot>
<slot name="_type" type="string"></slot>
</record>
<record id="3" template="HealthStatusRecord">
<slot name="ScoreType" type="string">HealthStatusRecord</slot>
<slot name="_score_ScoreType" type="string"></slot>
```

<slot name="source" type="string">C:\i2b2 eval\Subsets\Test\55.txt</slot>  
<slot name="\_score\_source" type="string"></slot>  
<slot name="region" type="region">  
<region end="3639" start="3635">pain</region>  
</slot>  
<slot name="\_score\_region" type="string"></slot>  
<slot name="rule" type="string">HealthStatusItemPkg/0</slot>  
<slot name="ConceptName" type="string">ABDOMINAL PAIN</slot>  
<slot name="\_score\_ConceptName" type="string"></slot>  
<slot name="SemanticType" type="string">Sign or Symptom</slot>  
<slot name="BodyLocations" type="string">ABDOMEN</slot>  
<slot name="\_score\_BodyLocations" type="string"></slot>  
<slot name="SeverityStrings" type="string"></slot>  
<slot name="UMLS\_CUI" type="string">C0000737</slot>  
<slot name="DaysBeforeDeath" type="int">0</slot>  
<slot name="PAIN" type="string">Y</slot>  
<slot name="MaxPain" type="int">1</slot>  
<slot name="SeverityScale" type="int">1</slot>  
<slot name="\_score\_SeverityScale" type="string"></slot>  
<slot name="polarity" type="string">POSITIVE</slot>  
<slot name="DocType" type="string"></slot>  
<slot name="PatientID" type="int">0</slot>  
<slot name="DateObject" type="record"/>  
<slot name="enddate" type="date">  
<date day="8" month="6" year="2004"/>  
</slot>

```
<slot name="_score_enddate" type="string"></slot>
<slot name="startdate" type="date">
<date day="1" month="6" year="2004"/>
</slot>
<slot name="_score_startdate" type="string"></slot>
<slot name="Patient" type="string">PATIENT</slot>
<slot name="_score_Patient" type="string"></slot>
<slot name="_keyref" type="record"/>
<slot name="_score" type="string"></slot>
<slot name="_type" type="string"></slot>
</record>
</records>
</infStore>
<?xml version="1.0" encoding="UTF-8"?>
<infStore>
<records>
<record id="0" template="HealthStatusRecord">
<slot name="ScoreType" type="string">HealthStatusRecord</slot>
<slot name="_score_ScoreType" type="string"></slot>
<slot name="source" type="string">C:\i2b2 eval\Subsets\Test\562.txt</slot>
<slot name="_score_source" type="string"></slot>
<slot name="region" type="region">
<region end="9072" start="9062">chest pain</region>
</slot>
<slot name="_score_region" type="string"></slot>
<slot name="rule" type="string">HealthStatusItemPkg/0</slot>
```

<slot name="ConceptName" type="string">CHEST PAIN UNSPECIFIED</slot>  
<slot name="\_score\_ConceptName" type="string"></slot>  
<slot name="SemanticType" type="string">Sign or Symptom</slot>  
<slot name="BodyLocations" type="string">CHEST</slot>  
<slot name="\_score\_BodyLocations" type="string"></slot>  
<slot name="SeverityStrings" type="string"></slot>  
<slot name="UMLS\_CUI" type="string">C1535568</slot>  
<slot name="DaysBeforeDeath" type="int">0</slot>  
<slot name="PAIN" type="string">Y</slot>  
<slot name="MaxPain" type="int">1</slot>  
<slot name="SeverityScale" type="int">1</slot>  
<slot name="\_score\_SeverityScale" type="string"></slot>  
<slot name="polarity" type="string">POSITIVE</slot>  
<slot name="DocType" type="string"></slot>  
<slot name="PatientID" type="int">0</slot>  
<slot name="DateObject" type="record"/>  
<slot name="enddate" type="date">  
<date day="3" month="11" year="1992"/>  
</slot>  
<slot name="\_score\_enddate" type="string"></slot>  
<slot name="startdate" type="date">  
<date day="3" month="11" year="1992"/>  
</slot>  
<slot name="\_score\_startdate" type="string"></slot>  
<slot name="Patient" type="string">PATIENT</slot>  
<slot name="\_score\_Patient" type="string"></slot>

```
<slot name="_keyref" type="record"/>
<slot name="_score" type="string"></slot>
<slot name="_type" type="string"></slot>
</record>
<record id="1" template="HealthStatusRecord">
<slot name="ScoreType" type="string">HealthStatusRecord</slot>
<slot name="_score_ScoreType" type="string"></slot>
<slot name="source" type="string">C:\i2b2 eval\Subsets\Test\562.txt</slot>
<slot name="_score_source" type="string"></slot>
<slot name="region" type="region">
<region end="9403" start="9393">chest pain</region>
</slot>
<slot name="_score_region" type="string"></slot>
<slot name="rule" type="string">HealthStatusItemPkg/0</slot>
<slot name="ConceptName" type="string">CHEST PAIN UNSPECIFIED</slot>
<slot name="_score_ConceptName" type="string"></slot>
<slot name="SemanticType" type="string">Sign or Symptom</slot>
<slot name="BodyLocations" type="string">CHEST</slot>
<slot name="_score_BodyLocations" type="string"></slot>
<slot name="SeverityStrings" type="string">DENIED</slot>
<slot name="UMLS_CUI" type="string">C1535568</slot>
<slot name="DaysBeforeDeath" type="int">0</slot>
<slot name="PAIN" type="string">Y</slot>
<slot name="MaxPain" type="int">1</slot>
<slot name="SeverityScale" type="int">0</slot>
<slot name="_score_SeverityScale" type="string"></slot>
```



```
<slot name="polarity" type="string">POSITIVE</slot>
<slot name="DocType" type="string"></slot>
<slot name="PatientID" type="int">0</slot>
<slot name="DateObject" type="record"/>
<slot name="enddate" type="date">
<date day="3" month="11" year="1992"/>
</slot>
<slot name="_score_enddate" type="string"></slot>
<slot name="startdate" type="date">
<date day="3" month="11" year="1992"/>
</slot>
<slot name="_score_startdate" type="string"></slot>
<slot name="Patient" type="string">PATIENT</slot>
<slot name="_score_Patient" type="string"></slot>
<slot name="_keyref" type="record"/>
<slot name="_score" type="string"></slot>
<slot name="_type" type="string"></slot>
</record>
<record id="2" template="HealthStatusRecord">
<slot name="ScoreType" type="string">HealthStatusRecord</slot>
<slot name="_score_ScoreType" type="string"></slot>
<slot name="source" type="string">C:\i2b2 eval\Subsets\Test\562.txt</slot>
<slot name="_score_source" type="string"></slot>
<slot name="region" type="region">
<region end="9590" start="9580">chest pain</region>
</slot>
```

<slot name="\_score\_region" type="string"></slot>  
<slot name="rule" type="string">HealthStatusItemPkg/0</slot>  
<slot name="ConceptName" type="string">CHEST PAIN UNSPECIFIED</slot>  
<slot name="\_score\_ConceptName" type="string"></slot>  
<slot name="SemanticType" type="string">Sign or Symptom</slot>  
<slot name="BodyLocations" type="string">CHEST</slot>  
<slot name="\_score\_BodyLocations" type="string"></slot>  
<slot name="SeverityStrings" type="string"></slot>  
<slot name="UMLS\_CUI" type="string">C1535568</slot>  
<slot name="DaysBeforeDeath" type="int">0</slot>  
<slot name="PAIN" type="string">Y</slot>  
<slot name="MaxPain" type="int">1</slot>  
<slot name="SeverityScale" type="int">0</slot>  
<slot name="\_score\_SeverityScale" type="string"></slot>  
<slot name="polarity" type="string">POSITIVE</slot>  
<slot name="DocType" type="string"></slot>  
<slot name="PatientID" type="int">0</slot>  
<slot name="DateObject" type="record"/>  
<slot name="enddate" type="date">  
<date day="3" month="11" year="1992"/>  
</slot>  
<slot name="\_score\_enddate" type="string"></slot>  
<slot name="startdate" type="date">  
<date day="3" month="11" year="1992"/>  
</slot>  
<slot name="\_score\_startdate" type="string"></slot>

```
<slot name="Patient" type="string">PATIENT</slot>
<slot name="_score_Patient" type="string"></slot>
<slot name="_keyref" type="record"/>
<slot name="_score" type="string"></slot>
<slot name="_type" type="string"></slot>
</record>
<record id="3" template="HealthStatusRecord">
<slot name="ScoreType" type="string">HealthStatusRecord</slot>
<slot name="_score_ScoreType" type="string"></slot>
<slot name="source" type="string">C:\i2b2 eval\Subsets\Test\562.txt</slot>
<slot name="_score_source" type="string"></slot>
<slot name="region" type="region">
<region end="2044" start="2034">chest pain</region>
</slot>
<slot name="_score_region" type="string"></slot>
<slot name="rule" type="string">HealthStatusItemPkg/0</slot>
<slot name="ConceptName" type="string">CHEST PAIN UNSPECIFIED</slot>
<slot name="_score_ConceptName" type="string"></slot>
<slot name="SemanticType" type="string">Sign or Symptom</slot>
<slot name="BodyLocations" type="string">CHEST</slot>
<slot name="_score_BodyLocations" type="string"></slot>
<slot name="SeverityStrings" type="string"></slot>
<slot name="UMLS_CUI" type="string">C1535568</slot>
<slot name="DaysBeforeDeath" type="int">0</slot>
<slot name="PAIN" type="string">Y</slot>
<slot name="MaxPain" type="int">1</slot>
```

```
<slot name="SeverityScale" type="int">1</slot>
<slot name="_score_SeverityScale" type="string"></slot>
<slot name="polarity" type="string">POSITIVE</slot>
<slot name="DocType" type="string"></slot>
<slot name="PatientID" type="int">0</slot>
<slot name="DateObject" type="record"/>
<slot name="enddate" type="date">
<date day="3" month="11" year="1992"/>
</slot>
<slot name="_score_enddate" type="string"></slot>
<slot name="startdate" type="date">
<date day="3" month="11" year="1992"/>
</slot>
<slot name="_score_startdate" type="string"></slot>
<slot name="Patient" type="string">PATIENT</slot>
<slot name="_score_Patient" type="string"></slot>
<slot name="_keyref" type="record"/>
<slot name="_score" type="string"></slot>
<slot name="_type" type="string"></slot>
</record>
</records>
</infStore>
<?xml version="1.0" encoding="UTF-8"?>
<infStore>
<records>
<record id="0" template="HealthStatusRecord">
```

<slot name="ScoreType" type="string">HealthStatusRecord</slot>  
<slot name="\_score\_ScoreType" type="string"></slot>  
<slot name="source" type="string">C:\i2b2 eval\Subsets\Test\564.txt</slot>  
<slot name="\_score\_source" type="string"></slot>  
<slot name="region" type="region">  
<region end="3636" start="3627">pain free</region>  
</slot>  
<slot name="\_score\_region" type="string"></slot>  
<slot name="rule" type="string">HealthStatusItemPkg/0</slot>  
<slot name="ConceptName" type="string">ABSENCE OF PAIN</slot>  
<slot name="\_score\_ConceptName" type="string"></slot>  
<slot name="SemanticType" type="string">Sign or Symptom</slot>  
<slot name="BodyLocations" type="string">CHEST</slot>  
<slot name="\_score\_BodyLocations" type="string"></slot>  
<slot name="SeverityStrings" type="string"></slot>  
<slot name="UMLS\_CUI" type="string">C0234225</slot>  
<slot name="DaysBeforeDeath" type="int">0</slot>  
<slot name="PAIN" type="string">Y</slot>  
<slot name="MaxPain" type="int">3</slot>  
<slot name="SeverityScale" type="int">0</slot>  
<slot name="\_score\_SeverityScale" type="string"></slot>  
<slot name="polarity" type="string">POSITIVE</slot>  
<slot name="DocType" type="string"></slot>  
<slot name="PatientID" type="int">0</slot>  
<slot name="DateObject" type="record"/>  
<slot name="enddate" type="date">

```
<date day="24" month="10" year="1993"/>
</slot>
<slot name="_score_enddate" type="string"></slot>
<slot name="startdate" type="date">
<date day="24" month="10" year="1993"/>
</slot>
<slot name="_score_startdate" type="string"></slot>
<slot name="Patient" type="string">PATIENT</slot>
<slot name="_score_Patient" type="string"></slot>
<slot name="_keyref" type="record"/>
<slot name="_score" type="string"></slot>
<slot name="_type" type="string"></slot>
</record>
<record id="1" template="HealthStatusRecord">
<slot name="ScoreType" type="string">HealthStatusRecord</slot>
<slot name="_score_ScoreType" type="string"></slot>
<slot name="source" type="string">C:\i2b2 eval\Subsets\Test\564.txt</slot>
<slot name="_score_source" type="string"></slot>
<slot name="region" type="region">
<region end="994" start="973">substernal chest pain</region>
</slot>
<slot name="_score_region" type="string"></slot>
<slot name="rule" type="string">HealthStatusItemPkg/0</slot>
<slot name="ConceptName" type="string">RETROSTERNAL CHEST PAIN</slot>
<slot name="_score_ConceptName" type="string"></slot>
<slot name="SemanticType" type="string">Sign or Symptom</slot>
```

<slot name="BodyLocations" type="string">STERNUM</slot>  
<slot name="\_score\_BodyLocations" type="string"></slot>  
<slot name="SeverityStrings" type="string">CRUSHING</slot>  
<slot name="UMLS\_CUI" type="string">C0151826</slot>  
<slot name="DaysBeforeDeath" type="int">0</slot>  
<slot name="PAIN" type="string">Y</slot>  
<slot name="MaxPain" type="int">3</slot>  
<slot name="SeverityScale" type="int">3</slot>  
<slot name="\_score\_SeverityScale" type="string"></slot>  
<slot name="polarity" type="string">POSITIVE</slot>  
<slot name="DocType" type="string"></slot>  
<slot name="PatientID" type="int">0</slot>  
<slot name="DateObject" type="record"/>  
<slot name="enddate" type="date">  
<date day="24" month="10" year="1993"/>  
</slot>  
<slot name="\_score\_enddate" type="string"></slot>  
<slot name="startdate" type="date">  
<date day="24" month="10" year="1993"/>  
</slot>  
<slot name="\_score\_startdate" type="string"></slot>  
<slot name="Patient" type="string">PATIENT</slot>  
<slot name="\_score\_Patient" type="string"></slot>  
<slot name="\_keyref" type="record"/>  
<slot name="\_score" type="string"></slot>  
<slot name="\_type" type="string"></slot>

```
</record>
<record id="2" template="HealthStatusRecord">
  <slot name="ScoreType" type="string">HealthStatusRecord</slot>
  <slot name="_score_ScoreType" type="string"></slot>
  <slot name="source" type="string">C:\i2b2 eval\Subsets\Test\564.txt</slot>
  <slot name="_score_source" type="string"></slot>
  <slot name="region" type="region">
    <region end="3382" start="3361">substernal chest pain</region>
  </slot>
  <slot name="_score_region" type="string"></slot>
  <slot name="rule" type="string">HealthStatusItemPkg/0</slot>
  <slot name="ConceptName" type="string">RETROSTERNAL CHEST PAIN</slot>
  <slot name="_score_ConceptName" type="string"></slot>
  <slot name="SemanticType" type="string">Sign or Symptom</slot>
  <slot name="BodyLocations" type="string">STERNUM</slot>
  <slot name="_score_BodyLocations" type="string"></slot>
  <slot name="SeverityStrings" type="string">CRUSHING</slot>
  <slot name="UMLS_CUI" type="string">C0151826</slot>
  <slot name="DaysBeforeDeath" type="int">0</slot>
  <slot name="PAIN" type="string">Y</slot>
  <slot name="MaxPain" type="int">3</slot>
  <slot name="SeverityScale" type="int">3</slot>
  <slot name="_score_SeverityScale" type="string"></slot>
  <slot name="polarity" type="string">POSITIVE</slot>
  <slot name="DocType" type="string"></slot>
  <slot name="PatientID" type="int">0</slot>
```



```
<slot name="DateObject" type="record"/>
<slot name="enddate" type="date">
<date day="24" month="1" year="1993"/>
</slot>
<slot name="_score_enddate" type="string"></slot>
<slot name="startdate" type="date">
<date day="24" month="1" year="1993"/>
</slot>
<slot name="_score_startdate" type="string"></slot>
<slot name="Patient" type="string">PATIENT</slot>
<slot name="_score_Patient" type="string"></slot>
<slot name="_keyref" type="record"/>
<slot name="_score" type="string"></slot>
<slot name="_type" type="string"></slot>
</record>
<record id="3" template="HealthStatusRecord">
<slot name="ScoreType" type="string">HealthStatusRecord</slot>
<slot name="_score_ScoreType" type="string"></slot>
<slot name="source" type="string">C:\i2b2 eval\Subsets\Test\564.txt</slot>
<slot name="_score_source" type="string"></slot>
<slot name="region" type="region">
<region end="8147" start="8137">chest pain</region>
</slot>
<slot name="_score_region" type="string"></slot>
<slot name="rule" type="string">HealthStatusItemPkg/0</slot>
<slot name="ConceptName" type="string">CHEST PAIN UNSPECIFIED</slot>
```

<slot name="\_score\_ConceptName" type="string"></slot>  
<slot name="SemanticType" type="string">Sign or Symptom</slot>  
<slot name="BodyLocations" type="string">CHEST</slot>  
<slot name="\_score\_BodyLocations" type="string"></slot>  
<slot name="SeverityStrings" type="string">NO</slot>  
<slot name="UMLS\_CUI" type="string">C1535568</slot>  
<slot name="DaysBeforeDeath" type="int">0</slot>  
<slot name="PAIN" type="string">Y</slot>  
<slot name="MaxPain" type="int">3</slot>  
<slot name="SeverityScale" type="int">0</slot>  
<slot name="\_score\_SeverityScale" type="string"></slot>  
<slot name="polarity" type="string">POSITIVE</slot>  
<slot name="DocType" type="string"></slot>  
<slot name="PatientID" type="int">0</slot>  
<slot name="DateObject" type="record"/>  
<slot name="enddate" type="date">  
<date day="2" month="11" year="1993"/>  
</slot>  
<slot name="\_score\_enddate" type="string"></slot>  
<slot name="startdate" type="date">  
<date day="2" month="11" year="1993"/>  
</slot>  
<slot name="\_score\_startdate" type="string"></slot>  
<slot name="Patient" type="string">PATIENT</slot>  
<slot name="\_score\_Patient" type="string"></slot>  
<slot name="\_keyref" type="record"/>

```
<slot name="_score" type="string"></slot>
<slot name="_type" type="string"></slot>
</record>
<record id="4" template="HealthStatusRecord">
<slot name="ScoreType" type="string">HealthStatusRecord</slot>
<slot name="_score_ScoreType" type="string"></slot>
<slot name="source" type="string">C:\i2b2 eval\Subsets\Test\564.txt</slot>
<slot name="_score_source" type="string"></slot>
<slot name="region" type="region">
<region end="7471" start="7461">chest pain</region>
</slot>
<slot name="_score_region" type="string"></slot>
<slot name="rule" type="string">HealthStatusItemPkg/0</slot>
<slot name="ConceptName" type="string">CHEST PAIN UNSPECIFIED</slot>
<slot name="_score_ConceptName" type="string"></slot>
<slot name="SemanticType" type="string">Sign or Symptom</slot>
<slot name="BodyLocations" type="string">CHEST</slot>
<slot name="_score_BodyLocations" type="string"></slot>
<slot name="SeverityStrings" type="string">WITHOUT ANY</slot>
<slot name="UMLS_CUI" type="string">C1535568</slot>
<slot name="DaysBeforeDeath" type="int">0</slot>
<slot name="PAIN" type="string">Y</slot>
<slot name="MaxPain" type="int">3</slot>
<slot name="SeverityScale" type="int">0</slot>
<slot name="_score_SeverityScale" type="string"></slot>
<slot name="polarity" type="string">POSITIVE</slot>
```

```
<slot name="DocType" type="string"></slot>
<slot name="PatientID" type="int">0</slot>
<slot name="DateObject" type="record"/>
<slot name="enddate" type="date">
<date day="2" month="11" year="1993"/>
</slot>
<slot name="_score_enddate" type="string"></slot>
<slot name="startdate" type="date">
<date day="24" month="10" year="1993"/>
</slot>
<slot name="_score_startdate" type="string"></slot>
<slot name="Patient" type="string">PATIENT</slot>
<slot name="_score_Patient" type="string"></slot>
<slot name="_keyref" type="record"/>
<slot name="_score" type="string"></slot>
<slot name="_type" type="string"></slot>
</record>
<record id="5" template="HealthStatusRecord">
<slot name="ScoreType" type="string">HealthStatusRecord</slot>
<slot name="_score_ScoreType" type="string"></slot>
<slot name="source" type="string">C:\i2b2 eval\Subsets\Test\564.txt</slot>
<slot name="_score_source" type="string"></slot>
<slot name="region" type="region">
<region end="1108" start="1089">crushing chest pain</region>
</slot>
<slot name="_score_region" type="string"></slot>
```

<slot name="rule" type="string"></slot>  
<slot name="ConceptName" type="string">CRUSHING CHEST PAIN</slot>  
<slot name="\_score\_ConceptName" type="string"></slot>  
<slot name="SemanticType" type="string"></slot>  
<slot name="BodyLocations" type="string">CHEST</slot>  
<slot name="\_score\_BodyLocations" type="string"></slot>  
<slot name="SeverityStrings" type="string">CRUSHING</slot>  
<slot name="UMLS\_CUI" type="string"></slot>  
<slot name="DaysBeforeDeath" type="int">0</slot>  
<slot name="PAIN" type="string">Y</slot>  
<slot name="MaxPain" type="int">0</slot>  
<slot name="SeverityScale" type="int">3</slot>  
<slot name="\_score\_SeverityScale" type="string"></slot>  
<slot name="polarity" type="string"></slot>  
<slot name="DocType" type="string"></slot>  
<slot name="PatientID" type="int">0</slot>  
<slot name="DateObject" type="record"/>  
<slot name="enddate" type="date">  
<date day="24" month="10" year="1993"/>  
</slot>  
<slot name="\_score\_enddate" type="string"></slot>  
<slot name="startdate" type="date">  
<date day="24" month="10" year="1993"/>  
</slot>  
<slot name="\_score\_startdate" type="string"></slot>  
<slot name="Patient" type="string"></slot>

```
<slot name="_score_Patient" type="string"></slot>
<slot name="_keyref" type="record"/>
<slot name="_score" type="string"></slot>
<slot name="_type" type="string"></slot>
</record>
</records>
</infStore>
<?xml version="1.0" encoding="UTF-8"?>
<infStore>
<records>
<record id="0" template="HealthStatusRecord">
<slot name="ScoreType" type="string">HealthStatusRecord</slot>
<slot name="_score_ScoreType" type="string"></slot>
<slot name="source" type="string">C:\i2b2 eval\Subsets\Test\565.txt</slot>
<slot name="_score_source" type="string"></slot>
<slot name="region" type="region">
<region end="5809" start="5799">chest pain</region>
</slot>
<slot name="_score_region" type="string"></slot>
<slot name="rule" type="string">HealthStatusItemPkg/0</slot>
<slot name="ConceptName" type="string">CHEST PAIN UNSPECIFIED</slot>
<slot name="_score_ConceptName" type="string"></slot>
<slot name="SemanticType" type="string">Sign or Symptom</slot>
<slot name="BodyLocations" type="string">CHEST</slot>
<slot name="_score_BodyLocations" type="string"></slot>
<slot name="SeverityStrings" type="string">NOT</slot>
```

```
<slot name="UMLS_CUI" type="string">C1535568</slot>
<slot name="DaysBeforeDeath" type="int">0</slot>
<slot name="PAIN" type="string">Y</slot>
<slot name="MaxPain" type="int">3</slot>
<slot name="SeverityScale" type="int">0</slot>
<slot name="_score_SeverityScale" type="string"></slot>
<slot name="polarity" type="string">POSITIVE</slot>
<slot name="DocType" type="string"></slot>
<slot name="PatientID" type="int">0</slot>
<slot name="DateObject" type="record"/>
<slot name="enddate" type="date">
<date day="8" month="8" year="1993"/>
</slot>
<slot name="_score_enddate" type="string"></slot>
<slot name="startdate" type="date">
<date day="8" month="8" year="1993"/>
</slot>
<slot name="_score_startdate" type="string"></slot>
<slot name="Patient" type="string">PATIENT</slot>
<slot name="_score_Patient" type="string"></slot>
<slot name="_keyref" type="record"/>
<slot name="_score" type="string"></slot>
<slot name="_type" type="string"></slot>
</record>
<record id="1" template="HealthStatusRecord">
<slot name="ScoreType" type="string">HealthStatusRecord</slot>
```

<slot name="\_score\_ScoreType" type="string"></slot>  
<slot name="source" type="string">C:\i2b2 eval\Subsets\Test\565.txt</slot>  
<slot name="\_score\_source" type="string"></slot>  
<slot name="region" type="region">  
<region end="643" start="633">chest pain</region>  
</slot>  
<slot name="\_score\_region" type="string"></slot>  
<slot name="rule" type="string">HealthStatusItemPkg/0</slot>  
<slot name="ConceptName" type="string">CHEST PAIN UNSPECIFIED</slot>  
<slot name="\_score\_ConceptName" type="string"></slot>  
<slot name="SemanticType" type="string">Sign or Symptom</slot>  
<slot name="BodyLocations" type="string">CHEST</slot>  
<slot name="\_score\_BodyLocations" type="string"></slot>  
<slot name="SeverityStrings" type="string">INTERMITTENT</slot>  
<slot name="UMLS\_CUI" type="string">C1535568</slot>  
<slot name="DaysBeforeDeath" type="int">0</slot>  
<slot name="PAIN" type="string">Y</slot>  
<slot name="MaxPain" type="int">3</slot>  
<slot name="SeverityScale" type="int">1</slot>  
<slot name="\_score\_SeverityScale" type="string"></slot>  
<slot name="polarity" type="string">POSITIVE</slot>  
<slot name="DocType" type="string"></slot>  
<slot name="PatientID" type="int">0</slot>  
<slot name="DateObject" type="record"/>  
<slot name="enddate" type="date">  
<date day="30" month="7" year="1993"/>



```
</slot>
<slot name="_score_enddate" type="string"></slot>
<slot name="startdate" type="date">
<date day="23" month="7" year="1993"/>
</slot>
<slot name="_score_startdate" type="string"></slot>
<slot name="Patient" type="string">PATIENT</slot>
<slot name="_score_Patient" type="string"></slot>
<slot name="_keyref" type="record"/>
<slot name="_score" type="string"></slot>
<slot name="_type" type="string"></slot>
</record>
<record id="2" template="HealthStatusRecord">
<slot name="ScoreType" type="string">HealthStatusRecord</slot>
<slot name="_score_ScoreType" type="string"></slot>
<slot name="source" type="string">C:\i2b2 eval\Subsets\Test\565.txt</slot>
<slot name="_score_source" type="string"></slot>
<slot name="region" type="region">
<region end="827" start="818">back pain</region>
</slot>
<slot name="_score_region" type="string"></slot>
<slot name="rule" type="string">HealthStatusItemPkg/0</slot>
<slot name="ConceptName" type="string">BACK PAINS</slot>
<slot name="_score_ConceptName" type="string"></slot>
<slot name="SemanticType" type="string">Sign or Symptom</slot>
<slot name="BodyLocations" type="string">BACK</slot>
```

```
<slot name="_score_BodyLocations" type="string"></slot>
<slot name="SeverityStrings" type="string"></slot>
<slot name="UMLS_CUI" type="string">C0004604</slot>
<slot name="DaysBeforeDeath" type="int">0</slot>
<slot name="PAIN" type="string">Y</slot>
<slot name="MaxPain" type="int">3</slot>
<slot name="SeverityScale" type="int">1</slot>
<slot name="_score_SeverityScale" type="string"></slot>
<slot name="polarity" type="string">POSITIVE</slot>
<slot name="DocType" type="string"></slot>
<slot name="PatientID" type="int">0</slot>
<slot name="DateObject" type="record"/>
<slot name="enddate" type="date">
<date day="29" month="7" year="1993"/>
</slot>
<slot name="_score_enddate" type="string"></slot>
<slot name="startdate" type="date">
<date day="29" month="7" year="1993"/>
</slot>
<slot name="_score_startdate" type="string"></slot>
<slot name="Patient" type="string">PATIENT</slot>
<slot name="_score_Patient" type="string"></slot>
<slot name="_keyref" type="record"/>
<slot name="_score" type="string"></slot>
<slot name="_type" type="string"></slot>
</record>
```

```
<record id="3" template="HealthStatusRecord">
  <slot name="ScoreType" type="string">HealthStatusRecord</slot>
  <slot name="_score_ScoreType" type="string"></slot>
  <slot name="source" type="string">C:\i2b2 eval\Subsets\Test\565.txt</slot>
  <slot name="_score_source" type="string"></slot>
  <slot name="region" type="region">
    <region end="5208" start="5198">chest pain</region>
  </slot>
  <slot name="_score_region" type="string"></slot>
  <slot name="rule" type="string">HealthStatusItemPkg/0</slot>
  <slot name="ConceptName" type="string">CHEST PAIN UNSPECIFIED</slot>
  <slot name="_score_ConceptName" type="string"></slot>
  <slot name="SemanticType" type="string">Sign or Symptom</slot>
  <slot name="BodyLocations" type="string">CHEST</slot>
  <slot name="_score_BodyLocations" type="string"></slot>
  <slot name="SeverityStrings" type="string">RECURRENT</slot>
  <slot name="UMLS_CUI" type="string">C1535568</slot>
  <slot name="DaysBeforeDeath" type="int">0</slot>
  <slot name="PAIN" type="string">Y</slot>
  <slot name="MaxPain" type="int">3</slot>
  <slot name="SeverityScale" type="int">0</slot>
  <slot name="_score_SeverityScale" type="string"></slot>
  <slot name="polarity" type="string">POSITIVE</slot>
  <slot name="DocType" type="string"></slot>
  <slot name="PatientID" type="int">0</slot>
  <slot name="DateObject" type="record"/>
```

```
<slot name="enddate" type="date">
<date day="9" month="8" year="1993"/>
</slot>
<slot name="_score_enddate" type="string"></slot>
<slot name="startdate" type="date">
<date day="4" month="8" year="1993"/>
</slot>
<slot name="_score_startdate" type="string"></slot>
<slot name="Patient" type="string">PATIENT</slot>
<slot name="_score_Patient" type="string"></slot>
<slot name="_keyref" type="record"/>
<slot name="_score" type="string"></slot>
<slot name="_type" type="string"></slot>
</record>
<record id="4" template="HealthStatusRecord">
<slot name="ScoreType" type="string">HealthStatusRecord</slot>
<slot name="_score_ScoreType" type="string"></slot>
<slot name="source" type="string">C:\i2b2 eval\Subsets\Test\565.txt</slot>
<slot name="_score_source" type="string"></slot>
<slot name="region" type="region">
<region end="774" start="753">substernal chest pain</region>
</slot>
<slot name="_score_region" type="string"></slot>
<slot name="rule" type="string">HealthStatusItemPkg/0</slot>
<slot name="ConceptName" type="string">RETROSTERNAL CHEST PAIN</slot>
<slot name="_score_ConceptName" type="string"></slot>
```

<slot name="SemanticType" type="string">Sign or Symptom</slot>  
<slot name="BodyLocations" type="string">STERNUM</slot>  
<slot name="\_score\_BodyLocations" type="string"></slot>  
<slot name="SeverityStrings" type="string">SEVERE</slot>  
<slot name="UMLS\_CUI" type="string">C0151826</slot>  
<slot name="DaysBeforeDeath" type="int">0</slot>  
<slot name="PAIN" type="string">Y</slot>  
<slot name="MaxPain" type="int">3</slot>  
<slot name="SeverityScale" type="int">3</slot>  
<slot name="\_score\_SeverityScale" type="string"></slot>  
<slot name="polarity" type="string">POSITIVE</slot>  
<slot name="DocType" type="string"></slot>  
<slot name="PatientID" type="int">0</slot>  
<slot name="DateObject" type="record"/>  
<slot name="enddate" type="date">  
<date day="29" month="7" year="1993"/>  
</slot>  
<slot name="\_score\_enddate" type="string"></slot>  
<slot name="startdate" type="date">  
<date day="29" month="7" year="1993"/>  
</slot>  
<slot name="\_score\_startdate" type="string"></slot>  
<slot name="Patient" type="string">PATIENT</slot>  
<slot name="\_score\_Patient" type="string"></slot>  
<slot name="\_keyref" type="record"/>  
<slot name="\_score" type="string"></slot>

```
<slot name="_type" type="string"></slot>
</record>
</records>
</infStore>
<?xml version="1.0" encoding="UTF-8"?>
<infStore>
<records>
<record id="0" template="HealthStatusRecord">
<slot name="ScoreType" type="string">HealthStatusRecord</slot>
<slot name="_score_ScoreType" type="string"></slot>
<slot name="source" type="string">C:\i2b2 eval\Subsets\Test\600.txt</slot>
<slot name="_score_source" type="string"></slot>
<slot name="region" type="region">
<region end="2440" start="2430">chest pain</region>
</slot>
<slot name="_score_region" type="string"></slot>
<slot name="rule" type="string">HealthStatusItemPkg/0</slot>
<slot name="ConceptName" type="string">CHEST PAIN UNSPECIFIED</slot>
<slot name="_score_ConceptName" type="string"></slot>
<slot name="SemanticType" type="string">Sign or Symptom</slot>
<slot name="BodyLocations" type="string">CHEST</slot>
<slot name="_score_BodyLocations" type="string"></slot>
<slot name="SeverityStrings" type="string">DENIED</slot>
<slot name="UMLS_CUI" type="string">C1535568</slot>
<slot name="DaysBeforeDeath" type="int">0</slot>
<slot name="PAIN" type="string">Y</slot>
```

```
<slot name="MaxPain" type="int">1</slot>
<slot name="SeverityScale" type="int">0</slot>
<slot name="_score_SeverityScale" type="string"></slot>
<slot name="polarity" type="string">POSITIVE</slot>
<slot name="DocType" type="string"></slot>
<slot name="PatientID" type="int">0</slot>
<slot name="DateObject" type="record"/>
<slot name="enddate" type="date">
<date day="4" month="8" year="1998"/>
</slot>
<slot name="_score_enddate" type="string"></slot>
<slot name="startdate" type="date">
<date day="4" month="8" year="1998"/>
</slot>
<slot name="_score_startdate" type="string"></slot>
<slot name="Patient" type="string">PATIENT</slot>
<slot name="_score_Patient" type="string"></slot>
<slot name="_keyref" type="record"/>
<slot name="_score" type="string"></slot>
<slot name="_type" type="string"></slot>
</record>
<record id="1" template="HealthStatusRecord">
<slot name="ScoreType" type="string">HealthStatusRecord</slot>
<slot name="_score_ScoreType" type="string"></slot>
<slot name="source" type="string">C:\i2b2 eval\Subsets\Test\600.txt</slot>
<slot name="_score_source" type="string"></slot>
```

```
<slot name="region" type="region">
<region end="1781" start="1777">pain</region>
</slot>
<slot name="_score_region" type="string"></slot>
<slot name="rule" type="string">HealthStatusItemPkg/0</slot>
<slot name="ConceptName" type="string">PAIN</slot>
<slot name="_score_ConceptName" type="string"></slot>
<slot name="SemanticType" type="string">Sign or Symptom</slot>
<slot name="BodyLocations" type="string"></slot>
<slot name="_score_BodyLocations" type="string"></slot>
<slot name="SeverityStrings" type="string"></slot>
<slot name="UMLS_CUI" type="string">C0030193</slot>
<slot name="DaysBeforeDeath" type="int">0</slot>
<slot name="PAIN" type="string">Y</slot>
<slot name="MaxPain" type="int">1</slot>
<slot name="SeverityScale" type="int">1</slot>
<slot name="_score_SeverityScale" type="string"></slot>
<slot name="polarity" type="string">POSITIVE</slot>
<slot name="DocType" type="string"></slot>
<slot name="PatientID" type="int">0</slot>
<slot name="DateObject" type="record"/>
<slot name="enddate" type="date">
<date day="4" month="8" year="1998"/>
</slot>
<slot name="_score_enddate" type="string"></slot>
<slot name="startdate" type="date">
```



```
<date day="4" month="8" year="1998"/>
</slot>
<slot name="_score_startdate" type="string"></slot>
<slot name="Patient" type="string">PATIENT</slot>
<slot name="_score_Patient" type="string"></slot>
<slot name="_keyref" type="record"/>
<slot name="_score" type="string"></slot>
<slot name="_type" type="string"></slot>
</record>
<record id="2" template="HealthStatusRecord">
<slot name="ScoreType" type="string">HealthStatusRecord</slot>
<slot name="_score_ScoreType" type="string"></slot>
<slot name="source" type="string">C:\i2b2 eval\Subsets\Test\600.txt</slot>
<slot name="_score_source" type="string"></slot>
<slot name="region" type="region">
<region end="2572" start="2565">dysuria</region>
</slot>
<slot name="_score_region" type="string"></slot>
<slot name="rule" type="string">HealthStatusItemPkg/0</slot>
<slot name="ConceptName" type="string">DYSURIA</slot>
<slot name="_score_ConceptName" type="string"></slot>
<slot name="SemanticType" type="string">Sign or Symptom</slot>
<slot name="BodyLocations" type="string">URETHRA</slot>
<slot name="_score_BodyLocations" type="string"></slot>
<slot name="SeverityStrings" type="string"></slot>
<slot name="UMLS_CUI" type="string">C0013428</slot>
```

```
<slot name="DaysBeforeDeath" type="int">0</slot>
<slot name="PAIN" type="string">Y</slot>
<slot name="MaxPain" type="int">1</slot>
<slot name="SeverityScale" type="int">0</slot>
<slot name="_score_SeverityScale" type="string"></slot>
<slot name="polarity" type="string">POSITIVE</slot>
<slot name="DocType" type="string"></slot>
<slot name="PatientID" type="int">0</slot>
<slot name="DateObject" type="record"/>
<slot name="enddate" type="date">
<date day="4" month="8" year="1998"/>
</slot>
<slot name="_score_enddate" type="string"></slot>
<slot name="startdate" type="date">
<date day="4" month="8" year="1998"/>
</slot>
<slot name="_score_startdate" type="string"></slot>
<slot name="Patient" type="string">PATIENT</slot>
<slot name="_score_Patient" type="string"></slot>
<slot name="_keyref" type="record"/>
<slot name="_score" type="string"></slot>
<slot name="_type" type="string"></slot>
</record>
</records>
</infStore>
<?xml version="1.0" encoding="UTF-8"?>
```

```
<infStore>
<records>
<record id="0" template="HealthStatusRecord">
<slot name="ScoreType" type="string">HealthStatusRecord</slot>
<slot name="_score_ScoreType" type="string"></slot>
<slot name="source" type="string">C:\i2b2 eval\Subsets\Test\603.txt</slot>
<slot name="_score_source" type="string"></slot>
<slot name="region" type="region">
<region end="602" start="588">right hip pain</region>
</slot>
<slot name="_score_region" type="string"></slot>
<slot name="rule" type="string">HealthStatusItemPkg/0</slot>
<slot name="ConceptName" type="string">RIGHT HIP JOINT PAIN</slot>
<slot name="_score_ConceptName" type="string"></slot>
<slot name="SemanticType" type="string">Sign or Symptom</slot>
<slot name="BodyLocations" type="string">HIP</slot>
<slot name="_score_BodyLocations" type="string"></slot>
<slot name="SeverityStrings" type="string"></slot>
<slot name="UMLS_CUI" type="string">C2202100</slot>
<slot name="DaysBeforeDeath" type="int">0</slot>
<slot name="PAIN" type="string">Y</slot>
<slot name="MaxPain" type="int">1</slot>
<slot name="SeverityScale" type="int">1</slot>
<slot name="_score_SeverityScale" type="string"></slot>
<slot name="polarity" type="string">POSITIVE</slot>
<slot name="DocType" type="string"></slot>
```

```
<slot name="PatientID" type="int">0</slot>
<slot name="DateObject" type="record"/>
<slot name="enddate" type="date">
<date day="11" month="3" year="1998"/>
</slot>
<slot name="_score_enddate" type="string"></slot>
<slot name="startdate" type="date">
<date day="11" month="3" year="1998"/>
</slot>
<slot name="_score_startdate" type="string"></slot>
<slot name="Patient" type="string">PATIENT</slot>
<slot name="_score_Patient" type="string"></slot>
<slot name="_keyref" type="record"/>
<slot name="_score" type="string"></slot>
<slot name="_type" type="string"></slot>
</record>
<record id="1" template="HealthStatusRecord">
<slot name="ScoreType" type="string">HealthStatusRecord</slot>
<slot name="_score_ScoreType" type="string"></slot>
<slot name="source" type="string">C:\i2b2 eval\Subsets\Test\603.txt</slot>
<slot name="_score_source" type="string"></slot>
<slot name="region" type="region">
<region end="2198" start="2194">pain</region>
</slot>
<slot name="_score_region" type="string"></slot>
<slot name="rule" type="string">HealthStatusItemPkg/0</slot>
```

<slot name="ConceptName" type="string">PAIN</slot>  
<slot name="\_score\_ConceptName" type="string"></slot>  
<slot name="SemanticType" type="string">Sign or Symptom</slot>  
<slot name="BodyLocations" type="string">HIP</slot>  
<slot name="\_score\_BodyLocations" type="string"></slot>  
<slot name="SeverityStrings" type="string"></slot>  
<slot name="UMLS\_CUI" type="string">C0030193</slot>  
<slot name="DaysBeforeDeath" type="int">0</slot>  
<slot name="PAIN" type="string">Y</slot>  
<slot name="MaxPain" type="int">1</slot>  
<slot name="SeverityScale" type="int">1</slot>  
<slot name="\_score\_SeverityScale" type="string"></slot>  
<slot name="polarity" type="string">POSITIVE</slot>  
<slot name="DocType" type="string"></slot>  
<slot name="PatientID" type="int">0</slot>  
<slot name="DateObject" type="record"/>  
<slot name="enddate" type="date">  
<date day="11" month="3" year="1998"/>  
</slot>  
<slot name="\_score\_enddate" type="string"></slot>  
<slot name="startdate" type="date">  
<date day="11" month="3" year="1998"/>  
</slot>  
<slot name="\_score\_startdate" type="string"></slot>  
<slot name="Patient" type="string">PATIENT</slot>  
<slot name="\_score\_Patient" type="string"></slot>

```
<slot name="_keyref" type="record"/>
<slot name="_score" type="string"></slot>
<slot name="_type" type="string"></slot>
</record>
</records>
</infStore>
<?xml version="1.0" encoding="UTF-8"?>
<infStore>
<records>
<record id="0" template="HealthStatusRecord">
<slot name="ScoreType" type="string">HealthStatusRecord</slot>
<slot name="_score_ScoreType" type="string"></slot>
<slot name="source" type="string">C:\i2b2 eval\Subsets\Test\604.txt</slot>
<slot name="_score_source" type="string"></slot>
<slot name="region" type="region">
<region end="2716" start="2712">pain</region>
</slot>
<slot name="_score_region" type="string"></slot>
<slot name="rule" type="string">HealthStatusItemPkg/0</slot>
<slot name="ConceptName" type="string">ABDOMINAL PAIN</slot>
<slot name="_score_ConceptName" type="string"></slot>
<slot name="SemanticType" type="string">Sign or Symptom</slot>
<slot name="BodyLocations" type="string">ABDOMEN</slot>
<slot name="_score_BodyLocations" type="string"></slot>
<slot name="SeverityStrings" type="string"></slot>
<slot name="UMLS_CUI" type="string">C0000737</slot>
```

```
<slot name="DaysBeforeDeath" type="int">0</slot>
<slot name="PAIN" type="string">Y</slot>
<slot name="MaxPain" type="int">1</slot>
<slot name="SeverityScale" type="int">0</slot>
<slot name="_score_SeverityScale" type="string"></slot>
<slot name="polarity" type="string">POSITIVE</slot>
<slot name="DocType" type="string"></slot>
<slot name="PatientID" type="int">0</slot>
<slot name="DateObject" type="record"/>
<slot name="enddate" type="date">
<date day="22" month="10" year="2000"/>
</slot>
<slot name="_score_enddate" type="string"></slot>
<slot name="startdate" type="date">
<date day="22" month="10" year="2000"/>
</slot>
<slot name="_score_startdate" type="string"></slot>
<slot name="Patient" type="string">PATIENT</slot>
<slot name="_score_Patient" type="string"></slot>
<slot name="_keyref" type="record"/>
<slot name="_score" type="string"></slot>
<slot name="_type" type="string"></slot>
</record>
<record id="1" template="HealthStatusRecord">
<slot name="ScoreType" type="string">HealthStatusRecord</slot>
<slot name="_score_ScoreType" type="string"></slot>
```

<slot name="source" type="string">C:\i2b2 eval\Subsets\Test\604.txt</slot>  
<slot name="\_score\_source" type="string"></slot>  
<slot name="region" type="region">  
<region end="4261" start="4257">pain</region>  
</slot>  
<slot name="\_score\_region" type="string"></slot>  
<slot name="rule" type="string">HealthStatusItemPkg/0</slot>  
<slot name="ConceptName" type="string">PAIN</slot>  
<slot name="\_score\_ConceptName" type="string"></slot>  
<slot name="SemanticType" type="string">Sign or Symptom</slot>  
<slot name="BodyLocations" type="string">MUCOUS MEMBRANES</slot>  
<slot name="\_score\_BodyLocations" type="string"></slot>  
<slot name="SeverityStrings" type="string"></slot>  
<slot name="UMLS\_CUI" type="string">C0030193</slot>  
<slot name="DaysBeforeDeath" type="int">0</slot>  
<slot name="PAIN" type="string">Y</slot>  
<slot name="MaxPain" type="int">1</slot>  
<slot name="SeverityScale" type="int">1</slot>  
<slot name="\_score\_SeverityScale" type="string"></slot>  
<slot name="polarity" type="string">POSITIVE</slot>  
<slot name="DocType" type="string"></slot>  
<slot name="PatientID" type="int">0</slot>  
<slot name="DateObject" type="record"/>  
<slot name="enddate" type="date">  
<date day="17" month="11" year="2000"/>  
</slot>



```
<slot name="_score_enddate" type="string"></slot>
<slot name="startdate" type="date">
<date day="29" month="10" year="2000"/>
</slot>
<slot name="_score_startdate" type="string"></slot>
<slot name="Patient" type="string">PATIENT</slot>
<slot name="_score_Patient" type="string"></slot>
<slot name="_keyref" type="record"/>
<slot name="_score" type="string"></slot>
<slot name="_type" type="string"></slot>
</record>
<record id="2" template="HealthStatusRecord">
<slot name="ScoreType" type="string">HealthStatusRecord</slot>
<slot name="_score_ScoreType" type="string"></slot>
<slot name="source" type="string">C:\i2b2 eval\Subsets\Test\604.txt</slot>
<slot name="_score_source" type="string"></slot>
<slot name="region" type="region">
<region end="2632" start="2622">chest pain</region>
</slot>
<slot name="_score_region" type="string"></slot>
<slot name="rule" type="string">HealthStatusItemPkg/0</slot>
<slot name="ConceptName" type="string">CHEST PAIN UNSPECIFIED</slot>
<slot name="_score_ConceptName" type="string"></slot>
<slot name="SemanticType" type="string">Sign or Symptom</slot>
<slot name="BodyLocations" type="string">CHEST</slot>
<slot name="_score_BodyLocations" type="string"></slot>
```

```
<slot name="SeverityStrings" type="string"></slot>
<slot name="UMLS_CUI" type="string">C1535568</slot>
<slot name="DaysBeforeDeath" type="int">0</slot>
<slot name="PAIN" type="string">Y</slot>
<slot name="MaxPain" type="int">1</slot>
<slot name="SeverityScale" type="int">0</slot>
<slot name="_score_SeverityScale" type="string"></slot>
<slot name="polarity" type="string">POSITIVE</slot>
<slot name="DocType" type="string"></slot>
<slot name="PatientID" type="int">0</slot>
<slot name="DateObject" type="record"/>
<slot name="enddate" type="date">
<date day="22" month="10" year="2000"/>
</slot>
<slot name="_score_enddate" type="string"></slot>
<slot name="startdate" type="date">
<date day="22" month="10" year="2000"/>
</slot>
<slot name="_score_startdate" type="string"></slot>
<slot name="Patient" type="string">PATIENT</slot>
<slot name="_score_Patient" type="string"></slot>
<slot name="_keyref" type="record"/>
<slot name="_score" type="string"></slot>
<slot name="_type" type="string"></slot>
</record>
</records>
```

```
</infStore>
<?xml version="1.0" encoding="UTF-8"?>
<infStore>
<records>
<record id="0" template="HealthStatusRecord">
<slot name="ScoreType" type="string">HealthStatusRecord</slot>
<slot name="_score_ScoreType" type="string"></slot>
<slot name="source" type="string">C:\i2b2 eval\Subsets\Test\611.txt</slot>
<slot name="_score_source" type="string"></slot>
<slot name="region" type="region">
<region end="1718" start="1708">chest pain</region>
</slot>
<slot name="_score_region" type="string"></slot>
<slot name="rule" type="string">HealthStatusItemPkg/0</slot>
<slot name="ConceptName" type="string">CHEST PAIN UNSPECIFIED</slot>
<slot name="_score_ConceptName" type="string"></slot>
<slot name="SemanticType" type="string">Sign or Symptom</slot>
<slot name="BodyLocations" type="string">CHEST</slot>
<slot name="_score_BodyLocations" type="string"></slot>
<slot name="SeverityStrings" type="string"></slot>
<slot name="UMLS_CUI" type="string">C1535568</slot>
<slot name="DaysBeforeDeath" type="int">0</slot>
<slot name="PAIN" type="string">Y</slot>
<slot name="MaxPain" type="int">1</slot>
<slot name="SeverityScale" type="int">1</slot>
<slot name="_score_SeverityScale" type="string"></slot>
```

```
<slot name="polarity" type="string">POSITIVE</slot>
<slot name="DocType" type="string"></slot>
<slot name="PatientID" type="int">0</slot>
<slot name="DateObject" type="record"/>
<slot name="enddate" type="date">
<date day="31" month="12" year="1998"/>
</slot>
<slot name="_score_enddate" type="string"></slot>
<slot name="startdate" type="date">
<date day="31" month="12" year="1998"/>
</slot>
<slot name="_score_startdate" type="string"></slot>
<slot name="Patient" type="string">PATIENT</slot>
<slot name="_score_Patient" type="string"></slot>
<slot name="_keyref" type="record"/>
<slot name="_score" type="string"></slot>
<slot name="_type" type="string"></slot>
</record>
<record id="1" template="HealthStatusRecord">
<slot name="ScoreType" type="string">HealthStatusRecord</slot>
<slot name="_score_ScoreType" type="string"></slot>
<slot name="source" type="string">C:\i2b2 eval\Subsets\Test\611.txt</slot>
<slot name="_score_source" type="string"></slot>
<slot name="region" type="region">
<region end="1463" start="1457">angina</region>
</slot>
```

<slot name="\_score\_region" type="string"></slot>  
<slot name="rule" type="string">HealthStatusItemPkg/0</slot>  
<slot name="ConceptName" type="string">ANGINA PECTORIS</slot>  
<slot name="\_score\_ConceptName" type="string"></slot>  
<slot name="SemanticType" type="string">Sign or Symptom</slot>  
<slot name="BodyLocations" type="string">CHEST</slot>  
<slot name="\_score\_BodyLocations" type="string"></slot>  
<slot name="SeverityStrings" type="string"></slot>  
<slot name="UMLS\_CUI" type="string">C0002962</slot>  
<slot name="DaysBeforeDeath" type="int">0</slot>  
<slot name="PAIN" type="string">Y</slot>  
<slot name="MaxPain" type="int">1</slot>  
<slot name="SeverityScale" type="int">1</slot>  
<slot name="\_score\_SeverityScale" type="string"></slot>  
<slot name="polarity" type="string">POSITIVE</slot>  
<slot name="DocType" type="string"></slot>  
<slot name="PatientID" type="int">0</slot>  
<slot name="DateObject" type="record"/>  
<slot name="enddate" type="date">  
<date day="30" month="6" year="1998"/>  
</slot>  
<slot name="\_score\_enddate" type="string"></slot>  
<slot name="startdate" type="date">  
<date day="1" month="6" year="1998"/>  
</slot>  
<slot name="\_score\_startdate" type="string"></slot>

```
<slot name="Patient" type="string">PATIENT</slot>
<slot name="_score_Patient" type="string"></slot>
<slot name="_keyref" type="record"/>
<slot name="_score" type="string"></slot>
<slot name="_type" type="string"></slot>
</record>
<record id="2" template="HealthStatusRecord">
<slot name="ScoreType" type="string">HealthStatusRecord</slot>
<slot name="_score_ScoreType" type="string"></slot>
<slot name="source" type="string">C:\i2b2 eval\Subsets\Test\611.txt</slot>
<slot name="_score_source" type="string"></slot>
<slot name="region" type="region">
<region end="1397" start="1387">chest pain</region>
</slot>
<slot name="_score_region" type="string"></slot>
<slot name="rule" type="string">HealthStatusItemPkg/0</slot>
<slot name="ConceptName" type="string">CHEST PAIN UNSPECIFIED</slot>
<slot name="_score_ConceptName" type="string"></slot>
<slot name="SemanticType" type="string">Sign or Symptom</slot>
<slot name="BodyLocations" type="string">CHEST</slot>
<slot name="_score_BodyLocations" type="string"></slot>
<slot name="SeverityStrings" type="string"></slot>
<slot name="UMLS_CUI" type="string">C1535568</slot>
<slot name="DaysBeforeDeath" type="int">0</slot>
<slot name="PAIN" type="string">Y</slot>
<slot name="MaxPain" type="int">1</slot>
```

```
<slot name="SeverityScale" type="int">1</slot>
<slot name="_score_SeverityScale" type="string"></slot>
<slot name="polarity" type="string">POSITIVE</slot>
<slot name="DocType" type="string"></slot>
<slot name="PatientID" type="int">0</slot>
<slot name="DateObject" type="record"/>
<slot name="enddate" type="date">
<date day="30" month="4" year="1998"/>
</slot>
<slot name="_score_enddate" type="string"></slot>
<slot name="startdate" type="date">
<date day="1" month="4" year="1998"/>
</slot>
<slot name="_score_startdate" type="string"></slot>
<slot name="Patient" type="string">PATIENT</slot>
<slot name="_score_Patient" type="string"></slot>
<slot name="_keyref" type="record"/>
<slot name="_score" type="string"></slot>
<slot name="_type" type="string"></slot>
</record>
<record id="3" template="HealthStatusRecord">
<slot name="ScoreType" type="string">HealthStatusRecord</slot>
<slot name="_score_ScoreType" type="string"></slot>
<slot name="source" type="string">C:\i2b2 eval\Subsets\Test\611.txt</slot>
<slot name="_score_source" type="string"></slot>
<slot name="region" type="region">
```

```
<region end="5386" start="5376">chest pain</region>
</slot>
<slot name="_score_region" type="string"></slot>
<slot name="rule" type="string">HealthStatusItemPkg/0</slot>
<slot name="ConceptName" type="string">CHEST PAIN UNSPECIFIED</slot>
<slot name="_score_ConceptName" type="string"></slot>
<slot name="SemanticType" type="string">Sign or Symptom</slot>
<slot name="BodyLocations" type="string">CHEST</slot>
<slot name="_score_BodyLocations" type="string"></slot>
<slot name="SeverityStrings" type="string"></slot>
<slot name="UMLS_CUI" type="string">C1535568</slot>
<slot name="DaysBeforeDeath" type="int">0</slot>
<slot name="PAIN" type="string">Y</slot>
<slot name="MaxPain" type="int">1</slot>
<slot name="SeverityScale" type="int">1</slot>
<slot name="_score_SeverityScale" type="string"></slot>
<slot name="polarity" type="string">POSITIVE</slot>
<slot name="DocType" type="string"></slot>
<slot name="PatientID" type="int">0</slot>
<slot name="DateObject" type="record"/>
<slot name="enddate" type="date">
<date day="13" month="1" year="1999"/>
</slot>
<slot name="_score_enddate" type="string"></slot>
<slot name="startdate" type="date">
<date day="13" month="1" year="1999"/>
```



```
</slot>
<slot name="_score_startdate" type="string"></slot>
<slot name="Patient" type="string">PATIENT</slot>
<slot name="_score_Patient" type="string"></slot>
<slot name="_keyref" type="record"/>
<slot name="_score" type="string"></slot>
<slot name="_type" type="string"></slot>
</record>
<record id="4" template="HealthStatusRecord">
<slot name="ScoreType" type="string">HealthStatusRecord</slot>
<slot name="_score_ScoreType" type="string"></slot>
<slot name="source" type="string">C:\i2b2 eval\Subsets\Test\611.txt</slot>
<slot name="_score_source" type="string"></slot>
<slot name="region" type="region">
<region end="5547" start="5543">pain</region>
</slot>
<slot name="_score_region" type="string"></slot>
<slot name="rule" type="string">HealthStatusItemPkg/0</slot>
<slot name="ConceptName" type="string">PAIN</slot>
<slot name="_score_ConceptName" type="string"></slot>
<slot name="SemanticType" type="string">Sign or Symptom</slot>
<slot name="BodyLocations" type="string">CHEST</slot>
<slot name="_score_BodyLocations" type="string"></slot>
<slot name="SeverityStrings" type="string"></slot>
<slot name="UMLS_CUI" type="string">C0030193</slot>
<slot name="DaysBeforeDeath" type="int">0</slot>
```

```
<slot name="PAIN" type="string">Y</slot>
<slot name="MaxPain" type="int">1</slot>
<slot name="SeverityScale" type="int">1</slot>
<slot name="_score_SeverityScale" type="string"></slot>
<slot name="polarity" type="string">POSITIVE</slot>
<slot name="DocType" type="string"></slot>
<slot name="PatientID" type="int">0</slot>
<slot name="DateObject" type="record"/>
<slot name="enddate" type="date">
<date day="13" month="1" year="1999"/>
</slot>
<slot name="_score_enddate" type="string"></slot>
<slot name="startdate" type="date">
<date day="13" month="1" year="1999"/>
</slot>
<slot name="_score_startdate" type="string"></slot>
<slot name="Patient" type="string">PATIENT</slot>
<slot name="_score_Patient" type="string"></slot>
<slot name="_keyref" type="record"/>
<slot name="_score" type="string"></slot>
<slot name="_type" type="string"></slot>
</record>
<record id="5" template="HealthStatusRecord">
<slot name="ScoreType" type="string">HealthStatusRecord</slot>
<slot name="_score_ScoreType" type="string"></slot>
<slot name="source" type="string">C:\i2b2 eval\Subsets\Test\611.txt</slot>
```

```
<slot name="_score_source" type="string"></slot>
<slot name="region" type="region">
<region end="4129" start="4123">tender</region>
</slot>
<slot name="_score_region" type="string"></slot>
<slot name="rule" type="string"></slot>
<slot name="ConceptName" type="string">TENDER</slot>
<slot name="_score_ConceptName" type="string"></slot>
<slot name="SemanticType" type="string"></slot>
<slot name="BodyLocations" type="string">ABDOMEN</slot>
<slot name="_score_BodyLocations" type="string"></slot>
<slot name="SeverityStrings" type="string"></slot>
<slot name="UMLS_CUI" type="string"></slot>
<slot name="DaysBeforeDeath" type="int">0</slot>
<slot name="PAIN" type="string">Y</slot>
<slot name="MaxPain" type="int">0</slot>
<slot name="SeverityScale" type="int">1</slot>
<slot name="_score_SeverityScale" type="string"></slot>
<slot name="polarity" type="string"></slot>
<slot name="DocType" type="string"></slot>
<slot name="PatientID" type="int">0</slot>
<slot name="DateObject" type="record"/>
<slot name="enddate" type="date">
<date day="10" month="1" year="1999"/>
</slot>
<slot name="_score_enddate" type="string"></slot>
```

```
<slot name="startdate" type="date">
<date day="10" month="1" year="1999"/>
</slot>
<slot name="_score_startdate" type="string"></slot>
<slot name="Patient" type="string"></slot>
<slot name="_score_Patient" type="string"></slot>
<slot name="_keyref" type="record"/>
<slot name="_score" type="string"></slot>
<slot name="_type" type="string"></slot>
</record>
<record id="6" template="HealthStatusRecord">
<slot name="ScoreType" type="string">HealthStatusRecord</slot>
<slot name="_score_ScoreType" type="string"></slot>
<slot name="source" type="string">C:\i2b2 eval\Subsets\Test\611.txt</slot>
<slot name="_score_source" type="string"></slot>
<slot name="region" type="region">
<region end="5322" start="5316">angina</region>
</slot>
<slot name="_score_region" type="string"></slot>
<slot name="rule" type="string">HealthStatusItemPkg/0</slot>
<slot name="ConceptName" type="string">ANGINA PECTORIS</slot>
<slot name="_score_ConceptName" type="string"></slot>
<slot name="SemanticType" type="string">Sign or Symptom</slot>
<slot name="BodyLocations" type="string">CHEST</slot>
<slot name="_score_BodyLocations" type="string"></slot>
<slot name="SeverityStrings" type="string"></slot>
```

```
<slot name="UMLS_CUI" type="string">C0002962</slot>
<slot name="DaysBeforeDeath" type="int">0</slot>
<slot name="PAIN" type="string">Y</slot>
<slot name="MaxPain" type="int">1</slot>
<slot name="SeverityScale" type="int">1</slot>
<slot name="_score_SeverityScale" type="string"></slot>
<slot name="polarity" type="string">POSITIVE</slot>
<slot name="DocType" type="string"></slot>
<slot name="PatientID" type="int">0</slot>
<slot name="DateObject" type="record"/>
<slot name="enddate" type="date">
<date day="10" month="1" year="1999"/>
</slot>
<slot name="_score_enddate" type="string"></slot>
<slot name="startdate" type="date">
<date day="10" month="1" year="1999"/>
</slot>
<slot name="_score_startdate" type="string"></slot>
<slot name="Patient" type="string">PATIENT</slot>
<slot name="_score_Patient" type="string"></slot>
<slot name="_keyref" type="record"/>
<slot name="_score" type="string"></slot>
<slot name="_type" type="string"></slot>
</record>
</records>
</infStore>
```

```
<?xml version="1.0" encoding="UTF-8"?>
<infStore>
<records>
<record id="0" template="HealthStatusRecord">
<slot name="ScoreType" type="string">HealthStatusRecord</slot>
<slot name="_score_ScoreType" type="string"></slot>
<slot name="source" type="string">C:\i2b2 eval\Subsets\Test\628.txt</slot>
<slot name="_score_source" type="string"></slot>
<slot name="region" type="region">
<region end="3531" start="3521">flank pain</region>
</slot>
<slot name="_score_region" type="string"></slot>
<slot name="rule" type="string">HealthStatusItemPkg/0</slot>
<slot name="ConceptName" type="string">ABDOMINAL PAIN</slot>
<slot name="_score_ConceptName" type="string"></slot>
<slot name="SemanticType" type="string">Sign or Symptom</slot>
<slot name="BodyLocations" type="string">ABDOMEN</slot>
<slot name="_score_BodyLocations" type="string"></slot>
<slot name="SeverityStrings" type="string"></slot>
<slot name="UMLS_CUI" type="string">C0000737</slot>
<slot name="DaysBeforeDeath" type="int">0</slot>
<slot name="PAIN" type="string">Y</slot>
<slot name="MaxPain" type="int">1</slot>
<slot name="SeverityScale" type="int">1</slot>
<slot name="_score_SeverityScale" type="string"></slot>
<slot name="polarity" type="string">POSITIVE</slot>
```

```
<slot name="DocType" type="string"></slot>
<slot name="PatientID" type="int">0</slot>
<slot name="DateObject" type="record"/>
<slot name="enddate" type="date">
<date day="4" month="7" year="2000"/>
</slot>
<slot name="_score_enddate" type="string"></slot>
<slot name="startdate" type="date">
<date day="4" month="7" year="2000"/>
</slot>
<slot name="_score_startdate" type="string"></slot>
<slot name="Patient" type="string">PATIENT</slot>
<slot name="_score_Patient" type="string"></slot>
<slot name="_keyref" type="record"/>
<slot name="_score" type="string"></slot>
<slot name="_type" type="string"></slot>
</record>
<record id="1" template="HealthStatusRecord">
<slot name="ScoreType" type="string">HealthStatusRecord</slot>
<slot name="_score_ScoreType" type="string"></slot>
<slot name="source" type="string">C:\i2b2 eval\Subsets\Test\628.txt</slot>
<slot name="_score_source" type="string"></slot>
<slot name="region" type="region">
<region end="579" start="575">pain</region>
</slot>
<slot name="_score_region" type="string"></slot>
```

```
<slot name="rule" type="string">HealthStatusItemPkg/0</slot>
<slot name="ConceptName" type="string">PAIN</slot>
<slot name="_score_ConceptName" type="string"></slot>
<slot name="SemanticType" type="string">Sign or Symptom</slot>
<slot name="BodyLocations" type="string">LEFT KIDNEY STRUCTURE</slot>
<slot name="_score_BodyLocations" type="string"></slot>
<slot name="SeverityStrings" type="string"></slot>
<slot name="UMLS_CUI" type="string">C0030193</slot>
<slot name="DaysBeforeDeath" type="int">0</slot>
<slot name="PAIN" type="string">Y</slot>
<slot name="MaxPain" type="int">1</slot>
<slot name="SeverityScale" type="int">1</slot>
<slot name="_score_SeverityScale" type="string"></slot>
<slot name="polarity" type="string">POSITIVE</slot>
<slot name="DocType" type="string"></slot>
<slot name="PatientID" type="int">0</slot>
<slot name="DateObject" type="record"/>
<slot name="enddate" type="date">
<date day="4" month="7" year="2000"/>
</slot>
<slot name="_score_enddate" type="string"></slot>
<slot name="startdate" type="date">
<date day="4" month="7" year="2000"/>
</slot>
<slot name="_score_startdate" type="string"></slot>
<slot name="Patient" type="string">PATIENT</slot>
```



```
<slot name="_score_Patient" type="string"></slot>
<slot name="_keyref" type="record"/>
<slot name="_score" type="string"></slot>
<slot name="_type" type="string"></slot>
</record>
<record id="2" template="HealthStatusRecord">
<slot name="ScoreType" type="string">HealthStatusRecord</slot>
<slot name="_score_ScoreType" type="string"></slot>
<slot name="source" type="string">C:\i2b2 eval\Subsets\Test\628.txt</slot>
<slot name="_score_source" type="string"></slot>
<slot name="region" type="region">
<region end="1908" start="1883">left sided abdominal pain</region>
</slot>
<slot name="_score_region" type="string"></slot>
<slot name="rule" type="string">HealthStatusItemPkg/0</slot>
<slot name="ConceptName" type="string">LEFT SIDED ABDOMINAL PAIN</slot>
<slot name="_score_ConceptName" type="string"></slot>
<slot name="SemanticType" type="string">Sign or Symptom</slot>
<slot name="BodyLocations" type="string">ABDOMEN</slot>
<slot name="_score_BodyLocations" type="string"></slot>
<slot name="SeverityStrings" type="string"></slot>
<slot name="UMLS_CUI" type="string">C0563276</slot>
<slot name="DaysBeforeDeath" type="int">0</slot>
<slot name="PAIN" type="string">Y</slot>
<slot name="MaxPain" type="int">1</slot>
<slot name="SeverityScale" type="int">1</slot>
```

```
<slot name="_score_SeverityScale" type="string"></slot>
<slot name="polarity" type="string">POSITIVE</slot>
<slot name="DocType" type="string"></slot>
<slot name="PatientID" type="int">0</slot>
<slot name="DateObject" type="record"/>
<slot name="enddate" type="date">
<date day="16" month="6" year="2000"/>
</slot>
<slot name="_score_enddate" type="string"></slot>
<slot name="startdate" type="date">
<date day="16" month="6" year="2000"/>
</slot>
<slot name="_score_startdate" type="string"></slot>
<slot name="Patient" type="string">PATIENT</slot>
<slot name="_score_Patient" type="string"></slot>
<slot name="_keyref" type="record"/>
<slot name="_score" type="string"></slot>
<slot name="_type" type="string"></slot>
</record>
<record id="3" template="HealthStatusRecord">
<slot name="ScoreType" type="string">HealthStatusRecord</slot>
<slot name="_score_ScoreType" type="string"></slot>
<slot name="source" type="string">C:\i2b2 eval\Subsets\Test\628.txt</slot>
<slot name="_score_source" type="string"></slot>
<slot name="region" type="region">
<region end="337" start="323">abdominal pain</region>
```

```
</slot>
<slot name="_score_region" type="string"></slot>
<slot name="rule" type="string">HealthStatusItemPkg/0</slot>
<slot name="ConceptName" type="string">ABDOMINAL PAIN</slot>
<slot name="_score_ConceptName" type="string"></slot>
<slot name="SemanticType" type="string">Sign or Symptom</slot>
<slot name="BodyLocations" type="string">ABDOMEN</slot>
<slot name="_score_BodyLocations" type="string"></slot>
<slot name="SeverityStrings" type="string"></slot>
<slot name="UMLS_CUI" type="string">C0000737</slot>
<slot name="DaysBeforeDeath" type="int">0</slot>
<slot name="PAIN" type="string">Y</slot>
<slot name="MaxPain" type="int">1</slot>
<slot name="SeverityScale" type="int">1</slot>
<slot name="_score_SeverityScale" type="string"></slot>
<slot name="polarity" type="string">POSITIVE</slot>
<slot name="DocType" type="string"></slot>
<slot name="PatientID" type="int">0</slot>
<slot name="DateObject" type="record"/>
<slot name="enddate" type="date">
<date day="4" month="7" year="2000"/>
</slot>
<slot name="_score_enddate" type="string"></slot>
<slot name="startdate" type="date">
<date day="4" month="7" year="2000"/>
</slot>
```

```
<slot name="_score_startdate" type="string"></slot>
<slot name="Patient" type="string">PATIENT</slot>
<slot name="_score_Patient" type="string"></slot>
<slot name="_keyref" type="record"/>
<slot name="_score" type="string"></slot>
<slot name="_type" type="string"></slot>
</record>
<record id="4" template="HealthStatusRecord">
<slot name="ScoreType" type="string">HealthStatusRecord</slot>
<slot name="_score_ScoreType" type="string"></slot>
<slot name="source" type="string">C:\i2b2 eval\Subsets\Test\628.txt</slot>
<slot name="_score_source" type="string"></slot>
<slot name="region" type="region">
<region end="5005" start="4995">tenderness</region>
</slot>
<slot name="_score_region" type="string"></slot>
<slot name="rule" type="string">HealthStatusItemPkg/0</slot>
<slot name="ConceptName" type="string">TENDERNESS</slot>
<slot name="_score_ConceptName" type="string"></slot>
<slot name="SemanticType" type="string">Sign or Symptom</slot>
<slot name="BodyLocations" type="string">FLANK</slot>
<slot name="_score_BodyLocations" type="string"></slot>
<slot name="SeverityStrings" type="string"></slot>
<slot name="UMLS_CUI" type="string">C0234233</slot>
<slot name="DaysBeforeDeath" type="int">0</slot>
<slot name="PAIN" type="string">Y</slot>
```

```
<slot name="MaxPain" type="int">1</slot>
<slot name="SeverityScale" type="int">1</slot>
<slot name="_score_SeverityScale" type="string"></slot>
<slot name="polarity" type="string">POSITIVE</slot>
<slot name="DocType" type="string"></slot>
<slot name="PatientID" type="int">0</slot>
<slot name="DateObject" type="record"/>
<slot name="enddate" type="date">
<date day="4" month="7" year="2000"/>
</slot>
<slot name="_score_enddate" type="string"></slot>
<slot name="startdate" type="date">
<date day="4" month="7" year="2000"/>
</slot>
<slot name="_score_startdate" type="string"></slot>
<slot name="Patient" type="string">PATIENT</slot>
<slot name="_score_Patient" type="string"></slot>
<slot name="_keyref" type="record"/>
<slot name="_score" type="string"></slot>
<slot name="_type" type="string"></slot>
</record>
<record id="5" template="HealthStatusRecord">
<slot name="ScoreType" type="string">HealthStatusRecord</slot>
<slot name="_score_ScoreType" type="string"></slot>
<slot name="source" type="string">C:\i2b2 eval\Subsets\Test\628.txt</slot>
<slot name="_score_source" type="string"></slot>
```

```
<slot name="region" type="region">
<region end="5113" start="5103">tenderness</region>
</slot>
<slot name="_score_region" type="string"></slot>
<slot name="rule" type="string">HealthStatusItemPkg/0</slot>
<slot name="ConceptName" type="string">LEFT FLANK PAINS</slot>
<slot name="_score_ConceptName" type="string"></slot>
<slot name="SemanticType" type="string">Sign or Symptom</slot>
<slot name="BodyLocations" type="string">LEFT LATERAL REGION OF ABDOMEN</slot>
<slot name="_score_BodyLocations" type="string"></slot>
<slot name="SeverityStrings" type="string">SOME</slot>
<slot name="UMLS_CUI" type="string">C0423641</slot>
<slot name="DaysBeforeDeath" type="int">0</slot>
<slot name="PAIN" type="string">Y</slot>
<slot name="MaxPain" type="int">1</slot>
<slot name="SeverityScale" type="int">1</slot>
<slot name="_score_SeverityScale" type="string"></slot>
<slot name="polarity" type="string">POSITIVE</slot>
<slot name="DocType" type="string"></slot>
<slot name="PatientID" type="int">0</slot>
<slot name="DateObject" type="record"/>
<slot name="enddate" type="date">
<date day="4" month="7" year="2000"/>
</slot>
<slot name="_score_enddate" type="string"></slot>
<slot name="startdate" type="date">
```

```
<date day="4" month="7" year="2000"/>
</slot>
<slot name="_score_startdate" type="string"></slot>
<slot name="Patient" type="string">PATIENT</slot>
<slot name="_score_Patient" type="string"></slot>
<slot name="_keyref" type="record"/>
<slot name="_score" type="string"></slot>
<slot name="_type" type="string"></slot>
</record>
<record id="6" template="HealthStatusRecord">
<slot name="ScoreType" type="string">HealthStatusRecord</slot>
<slot name="_score_ScoreType" type="string"></slot>
<slot name="source" type="string">C:\i2b2 eval\Subsets\Test\628.txt</slot>
<slot name="_score_source" type="string"></slot>
<slot name="region" type="region">
<region end="3314" start="3300">abdominal pain</region>
</slot>
<slot name="_score_region" type="string"></slot>
<slot name="rule" type="string">HealthStatusItemPkg/0</slot>
<slot name="ConceptName" type="string">ABDOMINAL PAIN</slot>
<slot name="_score_ConceptName" type="string"></slot>
<slot name="SemanticType" type="string">Sign or Symptom</slot>
<slot name="BodyLocations" type="string">ABDOMEN</slot>
<slot name="_score_BodyLocations" type="string"></slot>
<slot name="SeverityStrings" type="string">NO</slot>
<slot name="UMLS_CUI" type="string">C0000737</slot>
```

```
<slot name="DaysBeforeDeath" type="int">0</slot>
<slot name="PAIN" type="string">Y</slot>
<slot name="MaxPain" type="int">1</slot>
<slot name="SeverityScale" type="int">0</slot>
<slot name="_score_SeverityScale" type="string"></slot>
<slot name="polarity" type="string">POSITIVE</slot>
<slot name="DocType" type="string"></slot>
<slot name="PatientID" type="int">0</slot>
<slot name="DateObject" type="record"/>
<slot name="enddate" type="date">
<date day="4" month="7" year="2000"/>
</slot>
<slot name="_score_enddate" type="string"></slot>
<slot name="startdate" type="date">
<date day="4" month="7" year="2000"/>
</slot>
<slot name="_score_startdate" type="string"></slot>
<slot name="Patient" type="string">PATIENT</slot>
<slot name="_score_Patient" type="string"></slot>
<slot name="_keyref" type="record"/>
<slot name="_score" type="string"></slot>
<slot name="_type" type="string"></slot>
</record>
<record id="7" template="HealthStatusRecord">
<slot name="ScoreType" type="string">HealthStatusRecord</slot>
<slot name="_score_ScoreType" type="string"></slot>
```



<slot name="source" type="string">C:\i2b2 eval\Subsets\Test\628.txt</slot>  
<slot name="\_score\_source" type="string"></slot>  
<slot name="region" type="region">  
<region end="3206" start="3196">chest pain</region>  
</slot>  
<slot name="\_score\_region" type="string"></slot>  
<slot name="rule" type="string">HealthStatusItemPkg/0</slot>  
<slot name="ConceptName" type="string">CHEST PAIN UNSPECIFIED</slot>  
<slot name="\_score\_ConceptName" type="string"></slot>  
<slot name="SemanticType" type="string">Sign or Symptom</slot>  
<slot name="BodyLocations" type="string">CHEST</slot>  
<slot name="\_score\_BodyLocations" type="string"></slot>  
<slot name="SeverityStrings" type="string">DENIES</slot>  
<slot name="UMLS\_CUI" type="string">C1535568</slot>  
<slot name="DaysBeforeDeath" type="int">0</slot>  
<slot name="PAIN" type="string">Y</slot>  
<slot name="MaxPain" type="int">1</slot>  
<slot name="SeverityScale" type="int">0</slot>  
<slot name="\_score\_SeverityScale" type="string"></slot>  
<slot name="polarity" type="string">POSITIVE</slot>  
<slot name="DocType" type="string"></slot>  
<slot name="PatientID" type="int">0</slot>  
<slot name="DateObject" type="record"/>  
<slot name="enddate" type="date">  
<date day="4" month="7" year="2000"/>  
</slot>

```
<slot name="_score_enddate" type="string"></slot>
<slot name="startdate" type="date">
<date day="4" month="7" year="2000"/>
</slot>
<slot name="_score_startdate" type="string"></slot>
<slot name="Patient" type="string">PATIENT</slot>
<slot name="_score_Patient" type="string"></slot>
<slot name="_keyref" type="record"/>
<slot name="_score" type="string"></slot>
<slot name="_type" type="string"></slot>
</record>
<record id="8" template="HealthStatusRecord">
<slot name="ScoreType" type="string">HealthStatusRecord</slot>
<slot name="_score_ScoreType" type="string"></slot>
<slot name="source" type="string">C:\i2b2 eval\Subsets\Test\628.txt</slot>
<slot name="_score_source" type="string"></slot>
<slot name="region" type="region">
<region end="3193" start="3184">headaches</region>
</slot>
<slot name="_score_region" type="string"></slot>
<slot name="rule" type="string">HealthStatusItemPkg/0</slot>
<slot name="ConceptName" type="string">FRONTAL HEADACHE</slot>
<slot name="_score_ConceptName" type="string"></slot>
<slot name="SemanticType" type="string">Sign or Symptom</slot>
<slot name="BodyLocations" type="string">HEAD</slot>
<slot name="_score_BodyLocations" type="string"></slot>
```

```
<slot name="SeverityStrings" type="string">DENIES</slot>
<slot name="UMLS_CUI" type="string">C2004251</slot>
<slot name="DaysBeforeDeath" type="int">0</slot>
<slot name="PAIN" type="string">Y</slot>
<slot name="MaxPain" type="int">1</slot>
<slot name="SeverityScale" type="int">0</slot>
<slot name="_score_SeverityScale" type="string"></slot>
<slot name="polarity" type="string">POSITIVE</slot>
<slot name="DocType" type="string"></slot>
<slot name="PatientID" type="int">0</slot>
<slot name="DateObject" type="record"/>
<slot name="enddate" type="date">
<date day="4" month="7" year="2000"/>
</slot>
<slot name="_score_enddate" type="string"></slot>
<slot name="startdate" type="date">
<date day="4" month="7" year="2000"/>
</slot>
<slot name="_score_startdate" type="string"></slot>
<slot name="Patient" type="string">PATIENT</slot>
<slot name="_score_Patient" type="string"></slot>
<slot name="_keyref" type="record"/>
<slot name="_score" type="string"></slot>
<slot name="_type" type="string"></slot>
</record>
<record id="9" template="HealthStatusRecord">
```

<slot name="ScoreType" type="string">HealthStatusRecord</slot>  
<slot name="\_score\_ScoreType" type="string"></slot>  
<slot name="source" type="string">C:\i2b2 eval\Subsets\Test\628.txt</slot>  
<slot name="\_score\_source" type="string"></slot>  
<slot name="region" type="region">  
<region end="2960" start="2950">flank pain</region>  
</slot>  
<slot name="\_score\_region" type="string"></slot>  
<slot name="rule" type="string">HealthStatusItemPkg/0</slot>  
<slot name="ConceptName" type="string">FLANK PAINS</slot>  
<slot name="\_score\_ConceptName" type="string"></slot>  
<slot name="SemanticType" type="string">Sign or Symptom</slot>  
<slot name="BodyLocations" type="string">FLANK</slot>  
<slot name="\_score\_BodyLocations" type="string"></slot>  
<slot name="SeverityStrings" type="string"></slot>  
<slot name="UMLS\_CUI" type="string">C0016199</slot>  
<slot name="DaysBeforeDeath" type="int">0</slot>  
<slot name="PAIN" type="string">Y</slot>  
<slot name="MaxPain" type="int">1</slot>  
<slot name="SeverityScale" type="int">1</slot>  
<slot name="\_score\_SeverityScale" type="string"></slot>  
<slot name="polarity" type="string">POSITIVE</slot>  
<slot name="DocType" type="string"></slot>  
<slot name="PatientID" type="int">0</slot>  
<slot name="DateObject" type="record"/>  
<slot name="enddate" type="date">

```
<date day="4" month="7" year="2000"/>
</slot>
<slot name="_score_enddate" type="string"></slot>
<slot name="startdate" type="date">
<date day="4" month="7" year="2000"/>
</slot>
<slot name="_score_startdate" type="string"></slot>
<slot name="Patient" type="string">PATIENT</slot>
<slot name="_score_Patient" type="string"></slot>
<slot name="_keyref" type="record"/>
<slot name="_score" type="string"></slot>
<slot name="_type" type="string"></slot>
</record>
<record id="10" template="HealthStatusRecord">
<slot name="ScoreType" type="string">HealthStatusRecord</slot>
<slot name="_score_ScoreType" type="string"></slot>
<slot name="source" type="string">C:\i2b2 eval\Subsets\Test\628.txt</slot>
<slot name="_score_source" type="string"></slot>
<slot name="region" type="region">
<region end="1248" start="1234">abdominal pain</region>
</slot>
<slot name="_score_region" type="string"></slot>
<slot name="rule" type="string">HealthStatusItemPkg/0</slot>
<slot name="ConceptName" type="string">ABDOMINAL PAIN</slot>
<slot name="_score_ConceptName" type="string"></slot>
<slot name="SemanticType" type="string">Sign or Symptom</slot>
```

<slot name="BodyLocations" type="string">ABDOMEN</slot>  
<slot name="\_score\_BodyLocations" type="string"></slot>  
<slot name="SeverityStrings" type="string"></slot>  
<slot name="UMLS\_CUI" type="string">C0000737</slot>  
<slot name="DaysBeforeDeath" type="int">0</slot>  
<slot name="PAIN" type="string">Y</slot>  
<slot name="MaxPain" type="int">1</slot>  
<slot name="SeverityScale" type="int">1</slot>  
<slot name="\_score\_SeverityScale" type="string"></slot>  
<slot name="polarity" type="string">POSITIVE</slot>  
<slot name="DocType" type="string"></slot>  
<slot name="PatientID" type="int">0</slot>  
<slot name="DateObject" type="record"/>  
<slot name="enddate" type="date">  
<date day="31" month="5" year="1999"/>  
</slot>  
<slot name="\_score\_enddate" type="string"></slot>  
<slot name="startdate" type="date">  
<date day="1" month="5" year="1999"/>  
</slot>  
<slot name="\_score\_startdate" type="string"></slot>  
<slot name="Patient" type="string">PATIENT</slot>  
<slot name="\_score\_Patient" type="string"></slot>  
<slot name="\_keyref" type="record"/>  
<slot name="\_score" type="string"></slot>  
<slot name="\_type" type="string"></slot>

```
</record>
<record id="11" template="HealthStatusRecord">
  <slot name="ScoreType" type="string">HealthStatusRecord</slot>
  <slot name="_score_ScoreType" type="string"></slot>
  <slot name="source" type="string">C:\i2b2 eval\Subsets\Test\628.txt</slot>
  <slot name="_score_source" type="string"></slot>
  <slot name="region" type="region">
    <region end="3001" start="2997">pain</region>
  </slot>
  <slot name="_score_region" type="string"></slot>
  <slot name="rule" type="string">HealthStatusItemPkg/0</slot>
  <slot name="ConceptName" type="string">PAIN</slot>
  <slot name="_score_ConceptName" type="string"></slot>
  <slot name="SemanticType" type="string">Sign or Symptom</slot>
  <slot name="BodyLocations" type="string">KIDNEY URINARY SYSTEM</slot>
  <slot name="_score_BodyLocations" type="string"></slot>
  <slot name="SeverityStrings" type="string"></slot>
  <slot name="UMLS_CUI" type="string">C0030193</slot>
  <slot name="DaysBeforeDeath" type="int">0</slot>
  <slot name="PAIN" type="string">Y</slot>
  <slot name="MaxPain" type="int">1</slot>
  <slot name="SeverityScale" type="int">1</slot>
  <slot name="_score_SeverityScale" type="string"></slot>
  <slot name="polarity" type="string">POSITIVE</slot>
  <slot name="DocType" type="string"></slot>
  <slot name="PatientID" type="int">0</slot>
```

```
<slot name="DateObject" type="record"/>
<slot name="enddate" type="date">
<date day="4" month="7" year="2000"/>
</slot>
<slot name="_score_enddate" type="string"></slot>
<slot name="startdate" type="date">
<date day="4" month="7" year="2000"/>
</slot>
<slot name="_score_startdate" type="string"></slot>
<slot name="Patient" type="string">PATIENT</slot>
<slot name="_score_Patient" type="string"></slot>
<slot name="_keyref" type="record"/>
<slot name="_score" type="string"></slot>
<slot name="_type" type="string"></slot>
</record>
<record id="12" template="HealthStatusRecord">
<slot name="ScoreType" type="string">HealthStatusRecord</slot>
<slot name="_score_ScoreType" type="string"></slot>
<slot name="source" type="string">C:\i2b2 eval\Subsets\Test\628.txt</slot>
<slot name="_score_source" type="string"></slot>
<slot name="region" type="region">
<region end="3415" start="3405">tenderness</region>
</slot>
<slot name="_score_region" type="string"></slot>
<slot name="rule" type="string">HealthStatusItemPkg/0</slot>
<slot name="ConceptName" type="string">TENDERNESS</slot>
```



<slot name="\_score\_ConceptName" type="string"></slot>  
<slot name="SemanticType" type="string">Sign or Symptom</slot>  
<slot name="BodyLocations" type="string">JOINT</slot>  
<slot name="\_score\_BodyLocations" type="string"></slot>  
<slot name="SeverityStrings" type="string"></slot>  
<slot name="UMLS\_CUI" type="string">C0234233</slot>  
<slot name="DaysBeforeDeath" type="int">0</slot>  
<slot name="PAIN" type="string">Y</slot>  
<slot name="MaxPain" type="int">1</slot>  
<slot name="SeverityScale" type="int">0</slot>  
<slot name="\_score\_SeverityScale" type="string"></slot>  
<slot name="polarity" type="string">POSITIVE</slot>  
<slot name="DocType" type="string"></slot>  
<slot name="PatientID" type="int">0</slot>  
<slot name="DateObject" type="record"/>  
<slot name="enddate" type="date">  
<date day="4" month="7" year="2000"/>  
</slot>  
<slot name="\_score\_enddate" type="string"></slot>  
<slot name="startdate" type="date">  
<date day="4" month="7" year="2000"/>  
</slot>  
<slot name="\_score\_startdate" type="string"></slot>  
<slot name="Patient" type="string">PATIENT</slot>  
<slot name="\_score\_Patient" type="string"></slot>  
<slot name="\_keyref" type="record"/>

```
<slot name="_score" type="string"></slot>
<slot name="_type" type="string"></slot>
</record>
</records>
</infStore>
<?xml version="1.0" encoding="UTF-8"?>
<infStore>
<records>
<record id="0" template="HealthStatusRecord">
<slot name="ScoreType" type="string">HealthStatusRecord</slot>
<slot name="_score_ScoreType" type="string"></slot>
<slot name="source" type="string">C:\i2b2 eval\Subsets\Test\862.txt</slot>
<slot name="_score_source" type="string"></slot>
<slot name="region" type="region">
<region end="729" start="723">angina</region>
</slot>
<slot name="_score_region" type="string"></slot>
<slot name="rule" type="string">HealthStatusItemPkg/0</slot>
<slot name="ConceptName" type="string">ANGINA PECTORIS</slot>
<slot name="_score_ConceptName" type="string"></slot>
<slot name="SemanticType" type="string">Sign or Symptom</slot>
<slot name="BodyLocations" type="string">CHEST</slot>
<slot name="_score_BodyLocations" type="string"></slot>
<slot name="SeverityStrings" type="string"></slot>
<slot name="UMLS_CUI" type="string">C0002962</slot>
<slot name="DaysBeforeDeath" type="int">0</slot>
```

```
<slot name="PAIN" type="string">Y</slot>
<slot name="MaxPain" type="int">1</slot>
<slot name="SeverityScale" type="int">1</slot>
<slot name="_score_SeverityScale" type="string"></slot>
<slot name="polarity" type="string">POSITIVE</slot>
<slot name="DocType" type="string"></slot>
<slot name="PatientID" type="int">0</slot>
<slot name="DateObject" type="record"/>
<slot name="enddate" type="date">
<date day="25" month="3" year="1997"/>
</slot>
<slot name="_score_enddate" type="string"></slot>
<slot name="startdate" type="date">
<date day="25" month="3" year="1997"/>
</slot>
<slot name="_score_startdate" type="string"></slot>
<slot name="Patient" type="string">PATIENT</slot>
<slot name="_score_Patient" type="string"></slot>
<slot name="_keyref" type="record"/>
<slot name="_score" type="string"></slot>
<slot name="_type" type="string"></slot>
</record>
<record id="1" template="HealthStatusRecord">
<slot name="ScoreType" type="string">HealthStatusRecord</slot>
<slot name="_score_ScoreType" type="string"></slot>
<slot name="source" type="string">C:\i2b2 eval\Subsets\Test\862.txt</slot>
```

```
<slot name="_score_source" type="string"></slot>
<slot name="region" type="region">
<region end="1380" start="1370">discomfort</region>
</slot>
<slot name="_score_region" type="string"></slot>
<slot name="rule" type="string">HealthStatusItemPkg/0</slot>
<slot name="ConceptName" type="string">CHEST PAIN UNSPECIFIED</slot>
<slot name="_score_ConceptName" type="string"></slot>
<slot name="SemanticType" type="string">Sign or Symptom</slot>
<slot name="BodyLocations" type="string">CHEST</slot>
<slot name="_score_BodyLocations" type="string"></slot>
<slot name="SeverityStrings" type="string"></slot>
<slot name="UMLS_CUI" type="string">C1535568</slot>
<slot name="DaysBeforeDeath" type="int">0</slot>
<slot name="PAIN" type="string">Y</slot>
<slot name="MaxPain" type="int">1</slot>
<slot name="SeverityScale" type="int">1</slot>
<slot name="_score_SeverityScale" type="string"></slot>
<slot name="polarity" type="string">POSITIVE</slot>
<slot name="DocType" type="string"></slot>
<slot name="PatientID" type="int">0</slot>
<slot name="DateObject" type="record"/>
<slot name="enddate" type="date">
<date day="25" month="3" year="1997"/>
</slot>
<slot name="_score_enddate" type="string"></slot>
```

```
<slot name="startdate" type="date">
<date day="25" month="3" year="1997"/>
</slot>
<slot name="_score_startdate" type="string"></slot>
<slot name="Patient" type="string">PATIENT</slot>
<slot name="_score_Patient" type="string"></slot>
<slot name="_keyref" type="record"/>
<slot name="_score" type="string"></slot>
<slot name="_type" type="string"></slot>
</record>
</records>
</infStore>
<?xml version="1.0" encoding="UTF-8"?>
<infStore>
<records>
<record id="0" template="HealthStatusRecord">
<slot name="ScoreType" type="string">HealthStatusRecord</slot>
<slot name="_score_ScoreType" type="string"></slot>
<slot name="source" type="string">C:\i2b2 eval\Subsets\Test\865.txt</slot>
<slot name="_score_source" type="string"></slot>
<slot name="region" type="region">
<region end="7523" start="7519">pain</region>
</slot>
<slot name="_score_region" type="string"></slot>
<slot name="rule" type="string">HealthStatusItemPkg/0</slot>
<slot name="ConceptName" type="string">PAIN</slot>
```

<slot name="\_score\_ConceptName" type="string"></slot>  
<slot name="SemanticType" type="string">Sign or Symptom</slot>  
<slot name="BodyLocations" type="string">LEFT ARM</slot>  
<slot name="\_score\_BodyLocations" type="string"></slot>  
<slot name="SeverityStrings" type="string">RELIEF OF</slot>  
<slot name="UMLS\_CUI" type="string">C0030193</slot>  
<slot name="DaysBeforeDeath" type="int">0</slot>  
<slot name="PAIN" type="string">Y</slot>  
<slot name="MaxPain" type="int">3</slot>  
<slot name="SeverityScale" type="int">3</slot>  
<slot name="\_score\_SeverityScale" type="string"></slot>  
<slot name="polarity" type="string">POSITIVE</slot>  
<slot name="DocType" type="string"></slot>  
<slot name="PatientID" type="int">0</slot>  
<slot name="DateObject" type="record"/>  
<slot name="enddate" type="date">  
<date day="25" month="1" year="1994"/>  
</slot>  
<slot name="\_score\_enddate" type="string"></slot>  
<slot name="startdate" type="date">  
<date day="6" month="1" year="1994"/>  
</slot>  
<slot name="\_score\_startdate" type="string"></slot>  
<slot name="Patient" type="string">PATIENT</slot>  
<slot name="\_score\_Patient" type="string"></slot>  
<slot name="\_keyref" type="record"/>

```
<slot name="_score" type="string"></slot>
<slot name="_type" type="string"></slot>
</record>
<record id="1" template="HealthStatusRecord">
<slot name="ScoreType" type="string">HealthStatusRecord</slot>
<slot name="_score_ScoreType" type="string"></slot>
<slot name="source" type="string">C:\i2b2 eval\Subsets\Test\865.txt</slot>
<slot name="_score_source" type="string"></slot>
<slot name="region" type="region">
<region end="7194" start="7190">pain</region>
</slot>
<slot name="_score_region" type="string"></slot>
<slot name="rule" type="string">HealthStatusItemPkg/0</slot>
<slot name="ConceptName" type="string">PAIN IN LEFT ARM</slot>
<slot name="_score_ConceptName" type="string"></slot>
<slot name="SemanticType" type="string">Sign or Symptom</slot>
<slot name="BodyLocations" type="string">UPPER ARM LEFT</slot>
<slot name="_score_BodyLocations" type="string"></slot>
<slot name="SeverityStrings" type="string"></slot>
<slot name="UMLS_CUI" type="string">C0564820</slot>
<slot name="DaysBeforeDeath" type="int">0</slot>
<slot name="PAIN" type="string">Y</slot>
<slot name="MaxPain" type="int">3</slot>
<slot name="SeverityScale" type="int">1</slot>
<slot name="_score_SeverityScale" type="string"></slot>
<slot name="polarity" type="string">POSITIVE</slot>
```

```
<slot name="DocType" type="string"></slot>
<slot name="PatientID" type="int">0</slot>
<slot name="DateObject" type="record"/>
<slot name="enddate" type="date">
<date day="5" month="1" year="1994"/>
</slot>
<slot name="_score_enddate" type="string"></slot>
<slot name="startdate" type="date">
<date day="5" month="1" year="1994"/>
</slot>
<slot name="_score_startdate" type="string"></slot>
<slot name="Patient" type="string">PATIENT</slot>
<slot name="_score_Patient" type="string"></slot>
<slot name="_keyref" type="record"/>
<slot name="_score" type="string"></slot>
<slot name="_type" type="string"></slot>
</record>
<record id="2" template="HealthStatusRecord">
<slot name="ScoreType" type="string">HealthStatusRecord</slot>
<slot name="_score_ScoreType" type="string"></slot>
<slot name="source" type="string">C:\i2b2 eval\Subsets\Test\865.txt</slot>
<slot name="_score_source" type="string"></slot>
<slot name="region" type="region">
<region end="731" start="727">pain</region>
</slot>
<slot name="_score_region" type="string"></slot>
```



```
<slot name="rule" type="string"></slot>
<slot name="ConceptName" type="string">PAIN</slot>
<slot name="_score_ConceptName" type="string"></slot>
<slot name="SemanticType" type="string"></slot>
<slot name="BodyLocations" type="string">LEFT ARM</slot>
<slot name="_score_BodyLocations" type="string"></slot>
<slot name="SeverityStrings" type="string"></slot>
<slot name="UMLS_CUI" type="string"></slot>
<slot name="DaysBeforeDeath" type="int">0</slot>
<slot name="PAIN" type="string">Y</slot>
<slot name="MaxPain" type="int">0</slot>
<slot name="SeverityScale" type="int">1</slot>
<slot name="_score_SeverityScale" type="string"></slot>
<slot name="polarity" type="string"></slot>
<slot name="DocType" type="string"></slot>
<slot name="PatientID" type="int">0</slot>
<slot name="DateObject" type="record"/>
<slot name="enddate" type="date">
<date day="5" month="1" year="1994"/>
</slot>
<slot name="_score_enddate" type="string"></slot>
<slot name="startdate" type="date">
<date day="5" month="1" year="1994"/>
</slot>
<slot name="_score_startdate" type="string"></slot>
<slot name="Patient" type="string"></slot>
```

```
<slot name="_score_Patient" type="string"></slot>
<slot name="_keyref" type="record"/>
<slot name="_score" type="string"></slot>
<slot name="_type" type="string"></slot>
</record>
<record id="3" template="HealthStatusRecord">
<slot name="ScoreType" type="string">HealthStatusRecord</slot>
<slot name="_score_ScoreType" type="string"></slot>
<slot name="source" type="string">C:\i2b2 eval\Subsets\Test\865.txt</slot>
<slot name="_score_source" type="string"></slot>
<slot name="region" type="region">
<region end="7147" start="7143">pain</region>
</slot>
<slot name="_score_region" type="string"></slot>
<slot name="rule" type="string"></slot>
<slot name="ConceptName" type="string">PAIN</slot>
<slot name="_score_ConceptName" type="string"></slot>
<slot name="SemanticType" type="string"></slot>
<slot name="BodyLocations" type="string">LEFT ARM</slot>
<slot name="_score_BodyLocations" type="string"></slot>
<slot name="SeverityStrings" type="string"></slot>
<slot name="UMLS_CUI" type="string"></slot>
<slot name="DaysBeforeDeath" type="int">0</slot>
<slot name="PAIN" type="string">Y</slot>
<slot name="MaxPain" type="int">0</slot>
<slot name="SeverityScale" type="int">3</slot>
```

```
<slot name="_score_SeverityScale" type="string"></slot>
<slot name="polarity" type="string"></slot>
<slot name="DocType" type="string"></slot>
<slot name="PatientID" type="int">0</slot>
<slot name="DateObject" type="record"/>
<slot name="enddate" type="date">
<date day="5" month="1" year="1994"/>
</slot>
<slot name="_score_enddate" type="string"></slot>
<slot name="startdate" type="date">
<date day="5" month="1" year="1994"/>
</slot>
<slot name="_score_startdate" type="string"></slot>
<slot name="Patient" type="string"></slot>
<slot name="_score_Patient" type="string"></slot>
<slot name="_keyref" type="record"/>
<slot name="_score" type="string"></slot>
<slot name="_type" type="string"></slot>
</record>
<record id="4" template="HealthStatusRecord">
<slot name="ScoreType" type="string">HealthStatusRecord</slot>
<slot name="_score_ScoreType" type="string"></slot>
<slot name="source" type="string">C:\i2b2 eval\Subsets\Test\865.txt</slot>
<slot name="_score_source" type="string"></slot>
<slot name="region" type="region">
<region end="8063" start="8059">pain</region>
```

```
</slot>
<slot name="_score_region" type="string"></slot>
<slot name="rule" type="string">HealthStatusItemPkg/0</slot>
<slot name="ConceptName" type="string">PAIN</slot>
<slot name="_score_ConceptName" type="string"></slot>
<slot name="SemanticType" type="string">Sign or Symptom</slot>
<slot name="BodyLocations" type="string">LEFT ARM</slot>
<slot name="_score_BodyLocations" type="string"></slot>
<slot name="SeverityStrings" type="string">CONSIDERABLE</slot>
<slot name="UMLS_CUI" type="string">C0030193</slot>
<slot name="DaysBeforeDeath" type="int">0</slot>
<slot name="PAIN" type="string">Y</slot>
<slot name="MaxPain" type="int">3</slot>
<slot name="SeverityScale" type="int">3</slot>
<slot name="_score_SeverityScale" type="string"></slot>
<slot name="polarity" type="string">POSITIVE</slot>
<slot name="DocType" type="string"></slot>
<slot name="PatientID" type="int">0</slot>
<slot name="DateObject" type="record"/>
<slot name="enddate" type="date">
<date day="5" month="1" year="1994"/>
</slot>
<slot name="_score_enddate" type="string"></slot>
<slot name="startdate" type="date">
<date day="5" month="1" year="1994"/>
</slot>
```

```
<slot name="_score_startdate" type="string"></slot>
<slot name="Patient" type="string">PATIENT</slot>
<slot name="_score_Patient" type="string"></slot>
<slot name="_keyref" type="record"/>
<slot name="_score" type="string"></slot>
<slot name="_type" type="string"></slot>
</record>
<record id="5" template="HealthStatusRecord">
<slot name="ScoreType" type="string">HealthStatusRecord</slot>
<slot name="_score_ScoreType" type="string"></slot>
<slot name="source" type="string">C:\i2b2 eval\Subsets\Test\865.txt</slot>
<slot name="_score_source" type="string"></slot>
<slot name="region" type="region">
<region end="7971" start="7967">pain</region>
</slot>
<slot name="_score_region" type="string"></slot>
<slot name="rule" type="string">HealthStatusItemPkg/0</slot>
<slot name="ConceptName" type="string">PAIN</slot>
<slot name="_score_ConceptName" type="string"></slot>
<slot name="SemanticType" type="string">Sign or Symptom</slot>
<slot name="BodyLocations" type="string">LEFT ARM</slot>
<slot name="_score_BodyLocations" type="string"></slot>
<slot name="SeverityStrings" type="string"></slot>
<slot name="UMLS_CUI" type="string">C0030193</slot>
<slot name="DaysBeforeDeath" type="int">0</slot>
<slot name="PAIN" type="string">Y</slot>
```

```
<slot name="MaxPain" type="int">3</slot>
<slot name="SeverityScale" type="int">3</slot>
<slot name="_score_SeverityScale" type="string"></slot>
<slot name="polarity" type="string">POSITIVE</slot>
<slot name="DocType" type="string"></slot>
<slot name="PatientID" type="int">0</slot>
<slot name="DateObject" type="record"/>
<slot name="enddate" type="date">
<date day="5" month="1" year="1994"/>
</slot>
<slot name="_score_enddate" type="string"></slot>
<slot name="startdate" type="date">
<date day="5" month="1" year="1994"/>
</slot>
<slot name="_score_startdate" type="string"></slot>
<slot name="Patient" type="string">PATIENT</slot>
<slot name="_score_Patient" type="string"></slot>
<slot name="_keyref" type="record"/>
<slot name="_score" type="string"></slot>
<slot name="_type" type="string"></slot>
</record>
<record id="6" template="HealthStatusRecord">
<slot name="ScoreType" type="string">HealthStatusRecord</slot>
<slot name="_score_ScoreType" type="string"></slot>
<slot name="source" type="string">C:\i2b2 eval\Subsets\Test\865.txt</slot>
<slot name="_score_source" type="string"></slot>
```

```
<slot name="region" type="region">
<region end="11879" start="11875">pain</region>
</slot>
<slot name="_score_region" type="string"></slot>
<slot name="rule" type="string">HealthStatusItemPkg/0</slot>
<slot name="ConceptName" type="string">PAIN</slot>
<slot name="_score_ConceptName" type="string"></slot>
<slot name="SemanticType" type="string">Sign or Symptom</slot>
<slot name="BodyLocations" type="string">LEFT ARM</slot>
<slot name="_score_BodyLocations" type="string"></slot>
<slot name="SeverityStrings" type="string"></slot>
<slot name="UMLS_CUI" type="string">C0030193</slot>
<slot name="DaysBeforeDeath" type="int">0</slot>
<slot name="PAIN" type="string">Y</slot>
<slot name="MaxPain" type="int">3</slot>
<slot name="SeverityScale" type="int">1</slot>
<slot name="_score_SeverityScale" type="string"></slot>
<slot name="polarity" type="string">POSITIVE</slot>
<slot name="DocType" type="string"></slot>
<slot name="PatientID" type="int">0</slot>
<slot name="DateObject" type="record"/>
<slot name="enddate" type="date">
<date day="5" month="1" year="1994"/>
</slot>
<slot name="_score_enddate" type="string"></slot>
<slot name="startdate" type="date">
```

```
<date day="5" month="1" year="1994"/>
</slot>
<slot name="_score_startdate" type="string"></slot>
<slot name="Patient" type="string">PATIENT</slot>
<slot name="_score_Patient" type="string"></slot>
<slot name="_keyref" type="record"/>
<slot name="_score" type="string"></slot>
<slot name="_type" type="string"></slot>
</record>
</records>
</infStore>
<?xml version="1.0" encoding="UTF-8"?>
<infStore>
<records>
<record id="0" template="HealthStatusRecord">
<slot name="ScoreType" type="string">HealthStatusRecord</slot>
<slot name="_score_ScoreType" type="string"></slot>
<slot name="source" type="string">C:\i2b2 eval\Subsets\Test\873.txt</slot>
<slot name="_score_source" type="string"></slot>
<slot name="region" type="region">
<region end="1116" start="1106">discomfort</region>
</slot>
<slot name="_score_region" type="string"></slot>
<slot name="rule" type="string">HealthStatusItemPkg/0</slot>
<slot name="ConceptName" type="string">DISCOMFORT</slot>
<slot name="_score_ConceptName" type="string"></slot>
```



<slot name="SemanticType" type="string">Sign or Symptom</slot>  
<slot name="BodyLocations" type="string">SUPRAPUBIC</slot>  
<slot name="\_score\_BodyLocations" type="string"></slot>  
<slot name="SeverityStrings" type="string"></slot>  
<slot name="UMLS\_CUI" type="string">C2737161</slot>  
<slot name="DaysBeforeDeath" type="int">0</slot>  
<slot name="PAIN" type="string">Y</slot>  
<slot name="MaxPain" type="int">1</slot>  
<slot name="SeverityScale" type="int">1</slot>  
<slot name="\_score\_SeverityScale" type="string"></slot>  
<slot name="polarity" type="string">POSITIVE</slot>  
<slot name="DocType" type="string"></slot>  
<slot name="PatientID" type="int">0</slot>  
<slot name="DateObject" type="record"/>  
<slot name="enddate" type="date">  
<date day="30" month="3" year="1999"/>  
</slot>  
<slot name="\_score\_enddate" type="string"></slot>  
<slot name="startdate" type="date">  
<date day="30" month="3" year="1999"/>  
</slot>  
<slot name="\_score\_startdate" type="string"></slot>  
<slot name="Patient" type="string">PATIENT</slot>  
<slot name="\_score\_Patient" type="string"></slot>  
<slot name="\_keyref" type="record"/>  
<slot name="\_score" type="string"></slot>

```
<slot name="_type" type="string"></slot>
</record>
<record id="1" template="HealthStatusRecord">
<slot name="ScoreType" type="string">HealthStatusRecord</slot>
<slot name="_score_ScoreType" type="string"></slot>
<slot name="source" type="string">C:\i2b2 eval\Subsets\Test\873.txt</slot>
<slot name="_score_source" type="string"></slot>
<slot name="region" type="region">
<region end="7110" start="7096">abdominal pain</region>
</slot>
<slot name="_score_region" type="string"></slot>
<slot name="rule" type="string">HealthStatusItemPkg/0</slot>
<slot name="ConceptName" type="string">ABDOMINAL PAIN</slot>
<slot name="_score_ConceptName" type="string"></slot>
<slot name="SemanticType" type="string">Sign or Symptom</slot>
<slot name="BodyLocations" type="string">ABDOMEN</slot>
<slot name="_score_BodyLocations" type="string"></slot>
<slot name="SeverityStrings" type="string"></slot>
<slot name="UMLS_CUI" type="string">C0000737</slot>
<slot name="DaysBeforeDeath" type="int">0</slot>
<slot name="PAIN" type="string">Y</slot>
<slot name="MaxPain" type="int">1</slot>
<slot name="SeverityScale" type="int">1</slot>
<slot name="_score_SeverityScale" type="string"></slot>
<slot name="polarity" type="string">POSITIVE</slot>
<slot name="DocType" type="string"></slot>
```

```
<slot name="PatientID" type="int">0</slot>
<slot name="DateObject" type="record"/>
<slot name="enddate" type="date">
<date day="10" month="4" year="1999"/>
</slot>
<slot name="_score_enddate" type="string"></slot>
<slot name="startdate" type="date">
<date day="4" month="4" year="1999"/>
</slot>
<slot name="_score_startdate" type="string"></slot>
<slot name="Patient" type="string">PATIENT</slot>
<slot name="_score_Patient" type="string"></slot>
<slot name="_keyref" type="record"/>
<slot name="_score" type="string"></slot>
<slot name="_type" type="string"></slot>
</record>
<record id="2" template="HealthStatusRecord">
<slot name="ScoreType" type="string">HealthStatusRecord</slot>
<slot name="_score_ScoreType" type="string"></slot>
<slot name="source" type="string">C:\i2b2 eval\Subsets\Test\873.txt</slot>
<slot name="_score_source" type="string"></slot>
<slot name="region" type="region">
<region end="6749" start="6739">discomfort</region>
</slot>
<slot name="_score_region" type="string"></slot>
<slot name="rule" type="string">HealthStatusItemPkg/0</slot>
```

<slot name="ConceptName" type="string">DISCOMFORT</slot>  
<slot name="\_score\_ConceptName" type="string"></slot>  
<slot name="SemanticType" type="string">Sign or Symptom</slot>  
<slot name="BodyLocations" type="string">EPIGASTRIC</slot>  
<slot name="\_score\_BodyLocations" type="string"></slot>  
<slot name="SeverityStrings" type="string">MILD</slot>  
<slot name="UMLS\_CUI" type="string">C2737161</slot>  
<slot name="DaysBeforeDeath" type="int">0</slot>  
<slot name="PAIN" type="string">Y</slot>  
<slot name="MaxPain" type="int">1</slot>  
<slot name="SeverityScale" type="int">1</slot>  
<slot name="\_score\_SeverityScale" type="string"></slot>  
<slot name="polarity" type="string">POSITIVE</slot>  
<slot name="DocType" type="string"></slot>  
<slot name="PatientID" type="int">0</slot>  
<slot name="DateObject" type="record"/>  
<slot name="enddate" type="date">  
<date day="4" month="4" year="1999"/>  
</slot>  
<slot name="\_score\_enddate" type="string"></slot>  
<slot name="startdate" type="date">  
<date day="4" month="4" year="1999"/>  
</slot>  
<slot name="\_score\_startdate" type="string"></slot>  
<slot name="Patient" type="string">PATIENT</slot>  
<slot name="\_score\_Patient" type="string"></slot>

```
<slot name="_keyref" type="record"/>
<slot name="_score" type="string"></slot>
<slot name="_type" type="string"></slot>
</record>
<record id="3" template="HealthStatusRecord">
<slot name="ScoreType" type="string">HealthStatusRecord</slot>
<slot name="_score_ScoreType" type="string"></slot>
<slot name="source" type="string">C:\i2b2 eval\Subsets\Test\873.txt</slot>
<slot name="_score_source" type="string"></slot>
<slot name="region" type="region">
<region end="1898" start="1888">chest pain</region>
</slot>
<slot name="_score_region" type="string"></slot>
<slot name="rule" type="string">HealthStatusItemPkg/0</slot>
<slot name="ConceptName" type="string">CHEST PAIN UNSPECIFIED</slot>
<slot name="_score_ConceptName" type="string"></slot>
<slot name="SemanticType" type="string">Sign or Symptom</slot>
<slot name="BodyLocations" type="string">CHEST</slot>
<slot name="_score_BodyLocations" type="string"></slot>
<slot name="SeverityStrings" type="string">DENIES ANY</slot>
<slot name="UMLS_CUI" type="string">C1535568</slot>
<slot name="DaysBeforeDeath" type="int">0</slot>
<slot name="PAIN" type="string">Y</slot>
<slot name="MaxPain" type="int">1</slot>
<slot name="SeverityScale" type="int">0</slot>
<slot name="_score_SeverityScale" type="string"></slot>
```

```
<slot name="polarity" type="string">POSITIVE</slot>
<slot name="DocType" type="string"></slot>
<slot name="PatientID" type="int">0</slot>
<slot name="DateObject" type="record"/>
<slot name="enddate" type="date">
<date day="30" month="3" year="1999"/>
</slot>
<slot name="_score_enddate" type="string"></slot>
<slot name="startdate" type="date">
<date day="30" month="3" year="1999"/>
</slot>
<slot name="_score_startdate" type="string"></slot>
<slot name="Patient" type="string">PATIENT</slot>
<slot name="_score_Patient" type="string"></slot>
<slot name="_keyref" type="record"/>
<slot name="_score" type="string"></slot>
<slot name="_type" type="string"></slot>
</record>
<record id="4" template="HealthStatusRecord">
<slot name="ScoreType" type="string">HealthStatusRecord</slot>
<slot name="_score_ScoreType" type="string"></slot>
<slot name="source" type="string">C:\i2b2 eval\Subsets\Test\873.txt</slot>
<slot name="_score_source" type="string"></slot>
<slot name="region" type="region">
<region end="1246" start="1236">discomfort</region>
</slot>
```

<slot name="\_score\_region" type="string"></slot>  
<slot name="rule" type="string">HealthStatusItemPkg/0</slot>  
<slot name="ConceptName" type="string">DISCOMFORT</slot>  
<slot name="\_score\_ConceptName" type="string"></slot>  
<slot name="SemanticType" type="string">Sign or Symptom</slot>  
<slot name="BodyLocations" type="string">SUPRAPUBIC</slot>  
<slot name="\_score\_BodyLocations" type="string"></slot>  
<slot name="SeverityStrings" type="string"></slot>  
<slot name="UMLS\_CUI" type="string">C2737161</slot>  
<slot name="DaysBeforeDeath" type="int">0</slot>  
<slot name="PAIN" type="string">Y</slot>  
<slot name="MaxPain" type="int">1</slot>  
<slot name="SeverityScale" type="int">1</slot>  
<slot name="\_score\_SeverityScale" type="string"></slot>  
<slot name="polarity" type="string">POSITIVE</slot>  
<slot name="DocType" type="string"></slot>  
<slot name="PatientID" type="int">0</slot>  
<slot name="DateObject" type="record"/>  
<slot name="enddate" type="date">  
<date day="30" month="3" year="1999"/>  
</slot>  
<slot name="\_score\_enddate" type="string"></slot>  
<slot name="startdate" type="date">  
<date day="30" month="3" year="1999"/>  
</slot>  
<slot name="\_score\_startdate" type="string"></slot>

```
<slot name="Patient" type="string">PATIENT</slot>
<slot name="_score_Patient" type="string"></slot>
<slot name="_keyref" type="record"/>
<slot name="_score" type="string"></slot>
<slot name="_type" type="string"></slot>
</record>
</records>
</infStore>
<?xml version="1.0" encoding="UTF-8"?>
<infStore>
<records>
<record id="0" template="HealthStatusRecord">
<slot name="ScoreType" type="string">HealthStatusRecord</slot>
<slot name="_score_ScoreType" type="string"></slot>
<slot name="source" type="string">C:\i2b2 eval\Subsets\Test\874.txt</slot>
<slot name="_score_source" type="string"></slot>
<slot name="region" type="region">
<region end="538" start="526">claudication</region>
</slot>
<slot name="_score_region" type="string"></slot>
<slot name="rule" type="string">HealthStatusItemPkg/0</slot>
<slot name="ConceptName" type="string">LOWER EXTREMITY EXERTIONAL PAIN</slot>
<slot name="_score_ConceptName" type="string"></slot>
<slot name="SemanticType" type="string">Sign or Symptom</slot>
<slot name="BodyLocations" type="string">LEGS</slot>
<slot name="_score_BodyLocations" type="string"></slot>
```



```
<slot name="SeverityStrings" type="string">RECURRENT</slot>
<slot name="UMLS_CUI" type="string">C1456822</slot>
<slot name="DaysBeforeDeath" type="int">0</slot>
<slot name="PAIN" type="string">Y</slot>
<slot name="MaxPain" type="int">1</slot>
<slot name="SeverityScale" type="int">1</slot>
<slot name="_score_SeverityScale" type="string"></slot>
<slot name="polarity" type="string">POSITIVE</slot>
<slot name="DocType" type="string"></slot>
<slot name="PatientID" type="int">0</slot>
<slot name="DateObject" type="record"/>
<slot name="enddate" type="date">
<date day="18" month="1" year="2001"/>
</slot>
<slot name="_score_enddate" type="string"></slot>
<slot name="startdate" type="date">
<date day="18" month="8" year="2000"/>
</slot>
<slot name="_score_startdate" type="string"></slot>
<slot name="Patient" type="string">PATIENT</slot>
<slot name="_score_Patient" type="string"></slot>
<slot name="_keyref" type="record"/>
<slot name="_score" type="string"></slot>
<slot name="_type" type="string"></slot>
</record>
<record id="1" template="HealthStatusRecord">
```

<slot name="ScoreType" type="string">HealthStatusRecord</slot>  
<slot name="\_score\_ScoreType" type="string"></slot>  
<slot name="source" type="string">C:\i2b2 eval\Subsets\Test\874.txt</slot>  
<slot name="\_score\_source" type="string"></slot>  
<slot name="region" type="region">  
<region end="1755" start="1743">claudication</region>  
</slot>  
<slot name="\_score\_region" type="string"></slot>  
<slot name="rule" type="string">HealthStatusItemPkg/0</slot>  
<slot name="ConceptName" type="string">LOWER EXTREMITY EXERTIONAL PAIN</slot>  
<slot name="\_score\_ConceptName" type="string"></slot>  
<slot name="SemanticType" type="string">Sign or Symptom</slot>  
<slot name="BodyLocations" type="string">LEGS</slot>  
<slot name="\_score\_BodyLocations" type="string"></slot>  
<slot name="SeverityStrings" type="string"></slot>  
<slot name="UMLS\_CUI" type="string">C1456822</slot>  
<slot name="DaysBeforeDeath" type="int">0</slot>  
<slot name="PAIN" type="string">Y</slot>  
<slot name="MaxPain" type="int">1</slot>  
<slot name="SeverityScale" type="int">1</slot>  
<slot name="\_score\_SeverityScale" type="string"></slot>  
<slot name="polarity" type="string">POSITIVE</slot>  
<slot name="DocType" type="string"></slot>  
<slot name="PatientID" type="int">0</slot>  
<slot name="DateObject" type="record"/>  
<slot name="enddate" type="date">

```
<date day="18" month="1" year="2001"/>
</slot>
<slot name="_score_enddate" type="string"></slot>
<slot name="startdate" type="date">
<date day="18" month="1" year="2001"/>
</slot>
<slot name="_score_startdate" type="string"></slot>
<slot name="Patient" type="string">PATIENT</slot>
<slot name="_score_Patient" type="string"></slot>
<slot name="_keyref" type="record"/>
<slot name="_score" type="string"></slot>
<slot name="_type" type="string"></slot>
</record>
</records>
</infStore>
<?xml version="1.0" encoding="UTF-8"?>
<infStore>
<records>
<record id="0" template="HealthStatusRecord">
<slot name="ScoreType" type="string">HealthStatusRecord</slot>
<slot name="_score_ScoreType" type="string"></slot>
<slot name="source" type="string">C:\i2b2 eval\Subsets\Test\880.txt</slot>
<slot name="_score_source" type="string"></slot>
<slot name="region" type="region">
<region end="978" start="969">back pain</region>
</slot>
```

<slot name="\_score\_region" type="string"></slot>  
<slot name="rule" type="string">HealthStatusItemPkg/0</slot>  
<slot name="ConceptName" type="string">BACK PAINS</slot>  
<slot name="\_score\_ConceptName" type="string"></slot>  
<slot name="SemanticType" type="string">Sign or Symptom</slot>  
<slot name="BodyLocations" type="string">BACK</slot>  
<slot name="\_score\_BodyLocations" type="string"></slot>  
<slot name="SeverityStrings" type="string"></slot>  
<slot name="UMLS\_CUI" type="string">C0004604</slot>  
<slot name="DaysBeforeDeath" type="int">0</slot>  
<slot name="PAIN" type="string">Y</slot>  
<slot name="MaxPain" type="int">1</slot>  
<slot name="SeverityScale" type="int">1</slot>  
<slot name="\_score\_SeverityScale" type="string"></slot>  
<slot name="polarity" type="string">POSITIVE</slot>  
<slot name="DocType" type="string"></slot>  
<slot name="PatientID" type="int">0</slot>  
<slot name="DateObject" type="record"/>  
<slot name="enddate" type="date">  
<date day="23" month="9" year="2000"/>  
</slot>  
<slot name="\_score\_enddate" type="string"></slot>  
<slot name="startdate" type="date">  
<date day="23" month="9" year="2000"/>  
</slot>  
<slot name="\_score\_startdate" type="string"></slot>

```
<slot name="Patient" type="string">PATIENT</slot>
<slot name="_score_Patient" type="string"></slot>
<slot name="_keyref" type="record"/>
<slot name="_score" type="string"></slot>
<slot name="_type" type="string"></slot>
</record>
<record id="1" template="HealthStatusRecord">
<slot name="ScoreType" type="string">HealthStatusRecord</slot>
<slot name="_score_ScoreType" type="string"></slot>
<slot name="source" type="string">C:\i2b2 eval\Subsets\Test\880.txt</slot>
<slot name="_score_source" type="string"></slot>
<slot name="region" type="region">
<region end="853" start="849">pain</region>
</slot>
<slot name="_score_region" type="string"></slot>
<slot name="rule" type="string">HealthStatusItemPkg/0</slot>
<slot name="ConceptName" type="string">PAIN</slot>
<slot name="_score_ConceptName" type="string"></slot>
<slot name="SemanticType" type="string">Sign or Symptom</slot>
<slot name="BodyLocations" type="string">GROIN</slot>
<slot name="_score_BodyLocations" type="string"></slot>
<slot name="SeverityStrings" type="string"></slot>
<slot name="UMLS_CUI" type="string">C0030193</slot>
<slot name="DaysBeforeDeath" type="int">0</slot>
<slot name="PAIN" type="string">Y</slot>
<slot name="MaxPain" type="int">1</slot>
```

```
<slot name="SeverityScale" type="int">1</slot>
<slot name="_score_SeverityScale" type="string"></slot>
<slot name="polarity" type="string">POSITIVE</slot>
<slot name="DocType" type="string"></slot>
<slot name="PatientID" type="int">0</slot>
<slot name="DateObject" type="record"/>
<slot name="enddate" type="date">
<date day="23" month="9" year="2000"/>
</slot>
<slot name="_score_enddate" type="string"></slot>
<slot name="startdate" type="date">
<date day="23" month="9" year="2000"/>
</slot>
<slot name="_score_startdate" type="string"></slot>
<slot name="Patient" type="string">PATIENT</slot>
<slot name="_score_Patient" type="string"></slot>
<slot name="_keyref" type="record"/>
<slot name="_score" type="string"></slot>
<slot name="_type" type="string"></slot>
</record>
<record id="2" template="HealthStatusRecord">
<slot name="ScoreType" type="string">HealthStatusRecord</slot>
<slot name="_score_ScoreType" type="string"></slot>
<slot name="source" type="string">C:\i2b2 eval\Subsets\Test\880.txt</slot>
<slot name="_score_source" type="string"></slot>
<slot name="region" type="region">
```

```
<region end="893" start="880">low back pain</region>
</slot>
<slot name="_score_region" type="string"></slot>
<slot name="rule" type="string">HealthStatusItemPkg/0</slot>
<slot name="ConceptName" type="string">LOWER BACK PAINS</slot>
<slot name="_score_ConceptName" type="string"></slot>
<slot name="SemanticType" type="string">Sign or Symptom</slot>
<slot name="BodyLocations" type="string">LOWER BACK</slot>
<slot name="_score_BodyLocations" type="string"></slot>
<slot name="SeverityStrings" type="string"></slot>
<slot name="UMLS_CUI" type="string">C0024031</slot>
<slot name="DaysBeforeDeath" type="int">0</slot>
<slot name="PAIN" type="string">Y</slot>
<slot name="MaxPain" type="int">1</slot>
<slot name="SeverityScale" type="int">1</slot>
<slot name="_score_SeverityScale" type="string"></slot>
<slot name="polarity" type="string">POSITIVE</slot>
<slot name="DocType" type="string"></slot>
<slot name="PatientID" type="int">0</slot>
<slot name="DateObject" type="record"/>
<slot name="enddate" type="date">
<date day="23" month="9" year="2000"/>
</slot>
<slot name="_score_enddate" type="string"></slot>
<slot name="startdate" type="date">
<date day="23" month="5" year="2000"/>
```

```
</slot>
<slot name="_score_startdate" type="string"></slot>
<slot name="Patient" type="string">PATIENT</slot>
<slot name="_score_Patient" type="string"></slot>
<slot name="_keyref" type="record"/>
<slot name="_score" type="string"></slot>
<slot name="_type" type="string"></slot>
</record>
</records>
</infStore>
<?xml version="1.0" encoding="UTF-8"?>
<infStore>
<records>
<record id="0" template="HealthStatusRecord">
<slot name="ScoreType" type="string">HealthStatusRecord</slot>
<slot name="_score_ScoreType" type="string"></slot>
<slot name="source" type="string">C:\i2b2 eval\Subsets\Test\900.txt</slot>
<slot name="_score_source" type="string"></slot>
<slot name="region" type="region">
<region end="1673" start="1663">chest pain</region>
</slot>
<slot name="_score_region" type="string"></slot>
<slot name="rule" type="string">HealthStatusItemPkg/0</slot>
<slot name="ConceptName" type="string">CHEST PAIN UNSPECIFIED</slot>
<slot name="_score_ConceptName" type="string"></slot>
<slot name="SemanticType" type="string">Sign or Symptom</slot>
```



<slot name="BodyLocations" type="string">CHEST</slot>  
<slot name="\_score\_BodyLocations" type="string"></slot>  
<slot name="SeverityStrings" type="string"></slot>  
<slot name="UMLS\_CUI" type="string">C1535568</slot>  
<slot name="DaysBeforeDeath" type="int">0</slot>  
<slot name="PAIN" type="string">Y</slot>  
<slot name="MaxPain" type="int">1</slot>  
<slot name="SeverityScale" type="int">1</slot>  
<slot name="\_score\_SeverityScale" type="string"></slot>  
<slot name="polarity" type="string">POSITIVE</slot>  
<slot name="DocType" type="string"></slot>  
<slot name="PatientID" type="int">0</slot>  
<slot name="DateObject" type="record"/>  
<slot name="enddate" type="date">  
<date day="5" month="8" year="1998"/>  
</slot>  
<slot name="\_score\_enddate" type="string"></slot>  
<slot name="startdate" type="date">  
<date day="5" month="8" year="1998"/>  
</slot>  
<slot name="\_score\_startdate" type="string"></slot>  
<slot name="Patient" type="string">PATIENT</slot>  
<slot name="\_score\_Patient" type="string"></slot>  
<slot name="\_keyref" type="record"/>  
<slot name="\_score" type="string"></slot>  
<slot name="\_type" type="string"></slot>

```
</record>
<record id="1" template="HealthStatusRecord">
  <slot name="ScoreType" type="string">HealthStatusRecord</slot>
  <slot name="_score_ScoreType" type="string"></slot>
  <slot name="source" type="string">C:\i2b2 eval\Subsets\Test\900.txt</slot>
  <slot name="_score_source" type="string"></slot>
  <slot name="region" type="region">
    <region end="1355" start="1351">pain</region>
  </slot>
  <slot name="_score_region" type="string"></slot>
  <slot name="rule" type="string">HealthStatusItemPkg/0</slot>
  <slot name="ConceptName" type="string">PAIN</slot>
  <slot name="_score_ConceptName" type="string"></slot>
  <slot name="SemanticType" type="string">Sign or Symptom</slot>
  <slot name="BodyLocations" type="string">CHEST STRUCTURE</slot>
  <slot name="_score_BodyLocations" type="string"></slot>
  <slot name="SeverityStrings" type="string">INTERMITTENT</slot>
  <slot name="UMLS_CUI" type="string">C0030193</slot>
  <slot name="DaysBeforeDeath" type="int">0</slot>
  <slot name="PAIN" type="string">Y</slot>
  <slot name="MaxPain" type="int">1</slot>
  <slot name="SeverityScale" type="int">1</slot>
  <slot name="_score_SeverityScale" type="string"></slot>
  <slot name="polarity" type="string">POSITIVE</slot>
  <slot name="DocType" type="string"></slot>
  <slot name="PatientID" type="int">0</slot>
```

```
<slot name="DateObject" type="record"/>
<slot name="enddate" type="date">
<date day="5" month="8" year="1998"/>
</slot>
<slot name="_score_enddate" type="string"></slot>
<slot name="startdate" type="date">
<date day="5" month="8" year="1998"/>
</slot>
<slot name="_score_startdate" type="string"></slot>
<slot name="Patient" type="string">PATIENT</slot>
<slot name="_score_Patient" type="string"></slot>
<slot name="_keyref" type="record"/>
<slot name="_score" type="string"></slot>
<slot name="_type" type="string"></slot>
</record>
<record id="2" template="HealthStatusRecord">
<slot name="ScoreType" type="string">HealthStatusRecord</slot>
<slot name="_score_ScoreType" type="string"></slot>
<slot name="source" type="string">C:\i2b2 eval\Subsets\Test\900.txt</slot>
<slot name="_score_source" type="string"></slot>
<slot name="region" type="region">
<region end="1023" start="1001">right sided chest pain</region>
</slot>
<slot name="_score_region" type="string"></slot>
<slot name="rule" type="string">HealthStatusItemPkg/0</slot>
<slot name="ConceptName" type="string">RIGHT SIDED CHEST PAIN</slot>
```

<slot name="\_score\_ConceptName" type="string"></slot>  
<slot name="SemanticType" type="string">Sign or Symptom</slot>  
<slot name="BodyLocations" type="string">CHEST STRUCTURE</slot>  
<slot name="\_score\_BodyLocations" type="string"></slot>  
<slot name="SeverityStrings" type="string">5</slot>  
<slot name="UMLS\_CUI" type="string">C0563275</slot>  
<slot name="DaysBeforeDeath" type="int">0</slot>  
<slot name="PAIN" type="string">Y</slot>  
<slot name="MaxPain" type="int">1</slot>  
<slot name="SeverityScale" type="int">1</slot>  
<slot name="\_score\_SeverityScale" type="string"></slot>  
<slot name="polarity" type="string">POSITIVE</slot>  
<slot name="DocType" type="string"></slot>  
<slot name="PatientID" type="int">0</slot>  
<slot name="DateObject" type="record"/>  
<slot name="enddate" type="date">  
<date day="5" month="8" year="1998"/>  
</slot>  
<slot name="\_score\_enddate" type="string"></slot>  
<slot name="startdate" type="date">  
<date day="5" month="8" year="1998"/>  
</slot>  
<slot name="\_score\_startdate" type="string"></slot>  
<slot name="Patient" type="string">PATIENT</slot>  
<slot name="\_score\_Patient" type="string"></slot>  
<slot name="\_keyref" type="record"/>

```
<slot name="_score" type="string"></slot>
<slot name="_type" type="string"></slot>
</record>
<record id="3" template="HealthStatusRecord">
<slot name="ScoreType" type="string">HealthStatusRecord</slot>
<slot name="_score_ScoreType" type="string"></slot>
<slot name="source" type="string">C:\i2b2 eval\Subsets\Test\900.txt</slot>
<slot name="_score_source" type="string"></slot>
<slot name="region" type="region">
<region end="1586" start="1582">pain</region>
</slot>
<slot name="_score_region" type="string"></slot>
<slot name="rule" type="string">HealthStatusItemPkg/0</slot>
<slot name="ConceptName" type="string">PAIN</slot>
<slot name="_score_ConceptName" type="string"></slot>
<slot name="SemanticType" type="string">Sign or Symptom</slot>
<slot name="BodyLocations" type="string">RIGHT SIDED CHEST PAIN</slot>
<slot name="_score_BodyLocations" type="string"></slot>
<slot name="SeverityStrings" type="string"></slot>
<slot name="UMLS_CUI" type="string">C0030193</slot>
<slot name="DaysBeforeDeath" type="int">0</slot>
<slot name="PAIN" type="string">Y</slot>
<slot name="MaxPain" type="int">1</slot>
<slot name="SeverityScale" type="int">0</slot>
<slot name="_score_SeverityScale" type="string"></slot>
<slot name="polarity" type="string">POSITIVE</slot>
```

```
<slot name="DocType" type="string"></slot>
<slot name="PatientID" type="int">0</slot>
<slot name="DateObject" type="record"/>
<slot name="enddate" type="date">
<date day="5" month="8" year="1998"/>
</slot>
<slot name="_score_enddate" type="string"></slot>
<slot name="startdate" type="date">
<date day="5" month="8" year="1998"/>
</slot>
<slot name="_score_startdate" type="string"></slot>
<slot name="Patient" type="string">PATIENT</slot>
<slot name="_score_Patient" type="string"></slot>
<slot name="_keyref" type="record"/>
<slot name="_score" type="string"></slot>
<slot name="_type" type="string"></slot>
</record>
<record id="4" template="HealthStatusRecord">
<slot name="ScoreType" type="string">HealthStatusRecord</slot>
<slot name="_score_ScoreType" type="string"></slot>
<slot name="source" type="string">C:\i2b2 eval\Subsets\Test\900.txt</slot>
<slot name="_score_source" type="string"></slot>
<slot name="region" type="region">
<region end="4840" start="4836">pain</region>
</slot>
<slot name="_score_region" type="string"></slot>
```

```
<slot name="rule" type="string">HealthStatusItemPkg/0</slot>
<slot name="ConceptName" type="string">PAIN</slot>
<slot name="_score_ConceptName" type="string"></slot>
<slot name="SemanticType" type="string">Sign or Symptom</slot>
<slot name="BodyLocations" type="string">CHEST PAIN</slot>
<slot name="_score_BodyLocations" type="string"></slot>
<slot name="SeverityStrings" type="string"></slot>
<slot name="UMLS_CUI" type="string">C0030193</slot>
<slot name="DaysBeforeDeath" type="int">0</slot>
<slot name="PAIN" type="string">Y</slot>
<slot name="MaxPain" type="int">1</slot>
<slot name="SeverityScale" type="int">0</slot>
<slot name="_score_SeverityScale" type="string"></slot>
<slot name="polarity" type="string">POSITIVE</slot>
<slot name="DocType" type="string"></slot>
<slot name="PatientID" type="int">0</slot>
<slot name="DateObject" type="record"/>
<slot name="enddate" type="date">
<date day="6" month="8" year="1998"/>
</slot>
<slot name="_score_enddate" type="string"></slot>
<slot name="startdate" type="date">
<date day="6" month="8" year="1998"/>
</slot>
<slot name="_score_startdate" type="string"></slot>
<slot name="Patient" type="string">PATIENT</slot>
```

```
<slot name="_score_Patient" type="string"></slot>
<slot name="_keyref" type="record"/>
<slot name="_score" type="string"></slot>
<slot name="_type" type="string"></slot>
</record>
<record id="5" template="HealthStatusRecord">
<slot name="ScoreType" type="string">HealthStatusRecord</slot>
<slot name="_score_ScoreType" type="string"></slot>
<slot name="source" type="string">C:\i2b2 eval\Subsets\Test\900.txt</slot>
<slot name="_score_source" type="string"></slot>
<slot name="region" type="region">
<region end="3712" start="3700">claudication</region>
</slot>
<slot name="_score_region" type="string"></slot>
<slot name="rule" type="string">HealthStatusItemPkg/0</slot>
<slot name="ConceptName" type="string">LOWER EXTREMITY EXERTIONAL PAIN</slot>
<slot name="_score_ConceptName" type="string"></slot>
<slot name="SemanticType" type="string">Sign or Symptom</slot>
<slot name="BodyLocations" type="string">LEGS</slot>
<slot name="_score_BodyLocations" type="string"></slot>
<slot name="SeverityStrings" type="string">WITHOUT</slot>
<slot name="UMLS_CUI" type="string">C1456822</slot>
<slot name="DaysBeforeDeath" type="int">0</slot>
<slot name="PAIN" type="string">Y</slot>
<slot name="MaxPain" type="int">1</slot>
<slot name="SeverityScale" type="int">0</slot>
```



```
<slot name="_score_SeverityScale" type="string"></slot>
<slot name="polarity" type="string">POSITIVE</slot>
<slot name="DocType" type="string"></slot>
<slot name="PatientID" type="int">0</slot>
<slot name="DateObject" type="record"/>
<slot name="enddate" type="date">
<date day="5" month="8" year="1998"/>
</slot>
<slot name="_score_enddate" type="string"></slot>
<slot name="startdate" type="date">
<date day="5" month="8" year="1998"/>
</slot>
<slot name="_score_startdate" type="string"></slot>
<slot name="Patient" type="string">PATIENT</slot>
<slot name="_score_Patient" type="string"></slot>
<slot name="_keyref" type="record"/>
<slot name="_score" type="string"></slot>
<slot name="_type" type="string"></slot>
</record>
<record id="6" template="HealthStatusRecord">
<slot name="ScoreType" type="string">HealthStatusRecord</slot>
<slot name="_score_ScoreType" type="string"></slot>
<slot name="source" type="string">C:\i2b2 eval\Subsets\Test\900.txt</slot>
<slot name="_score_source" type="string"></slot>
<slot name="region" type="region">
<region end="3640" start="3630">tenderness</region>
```

```
</slot>
<slot name="_score_region" type="string"></slot>
<slot name="rule" type="string">HealthStatusItemPkg/0</slot>
<slot name="ConceptName" type="string">TENDERNESS</slot>
<slot name="_score_ConceptName" type="string"></slot>
<slot name="SemanticType" type="string">Sign or Symptom</slot>
<slot name="BodyLocations" type="string">ABDOMEN</slot>
<slot name="_score_BodyLocations" type="string"></slot>
<slot name="SeverityStrings" type="string">NO</slot>
<slot name="UMLS_CUI" type="string">C0234233</slot>
<slot name="DaysBeforeDeath" type="int">0</slot>
<slot name="PAIN" type="string">Y</slot>
<slot name="MaxPain" type="int">1</slot>
<slot name="SeverityScale" type="int">0</slot>
<slot name="_score_SeverityScale" type="string"></slot>
<slot name="polarity" type="string">POSITIVE</slot>
<slot name="DocType" type="string"></slot>
<slot name="PatientID" type="int">0</slot>
<slot name="DateObject" type="record"/>
<slot name="enddate" type="date">
<date day="5" month="8" year="1998"/>
</slot>
<slot name="_score_enddate" type="string"></slot>
<slot name="startdate" type="date">
<date day="5" month="8" year="1998"/>
</slot>
```

```
<slot name="_score_startdate" type="string"></slot>
<slot name="Patient" type="string">PATIENT</slot>
<slot name="_score_Patient" type="string"></slot>
<slot name="_keyref" type="record"/>
<slot name="_score" type="string"></slot>
<slot name="_type" type="string"></slot>
</record>
<record id="7" template="HealthStatusRecord">
<slot name="ScoreType" type="string">HealthStatusRecord</slot>
<slot name="_score_ScoreType" type="string"></slot>
<slot name="source" type="string">C:\i2b2 eval\Subsets\Test\900.txt</slot>
<slot name="_score_source" type="string"></slot>
<slot name="region" type="region">
<region end="629" start="607">Right sided chest pain</region>
</slot>
<slot name="_score_region" type="string"></slot>
<slot name="rule" type="string">HealthStatusItemPkg/0</slot>
<slot name="ConceptName" type="string">RIGHT SIDED CHEST PAIN</slot>
<slot name="_score_ConceptName" type="string"></slot>
<slot name="SemanticType" type="string">Sign or Symptom</slot>
<slot name="BodyLocations" type="string">CHEST STRUCTURE</slot>
<slot name="_score_BodyLocations" type="string"></slot>
<slot name="SeverityStrings" type="string"></slot>
<slot name="UMLS_CUI" type="string">C0563275</slot>
<slot name="DaysBeforeDeath" type="int">0</slot>
<slot name="PAIN" type="string">Y</slot>
```

```
<slot name="MaxPain" type="int">1</slot>
<slot name="SeverityScale" type="int">1</slot>
<slot name="_score_SeverityScale" type="string"></slot>
<slot name="polarity" type="string">POSITIVE</slot>
<slot name="DocType" type="string"></slot>
<slot name="PatientID" type="int">0</slot>
<slot name="DateObject" type="record"/>
<slot name="enddate" type="date">
<date day="5" month="8" year="1998"/>
</slot>
<slot name="_score_enddate" type="string"></slot>
<slot name="startdate" type="date">
<date day="5" month="8" year="1998"/>
</slot>
<slot name="_score_startdate" type="string"></slot>
<slot name="Patient" type="string">PATIENT</slot>
<slot name="_score_Patient" type="string"></slot>
<slot name="_keyref" type="record"/>
<slot name="_score" type="string"></slot>
<slot name="_type" type="string"></slot>
</record>
<record id="8" template="HealthStatusRecord">
<slot name="ScoreType" type="string">HealthStatusRecord</slot>
<slot name="_score_ScoreType" type="string"></slot>
<slot name="source" type="string">C:\i2b2 eval\Subsets\Test\900.txt</slot>
<slot name="_score_source" type="string"></slot>
```

```
<slot name="region" type="region">
<region end="3471" start="3440">costovertebral angle tenderness</region>
</slot>
<slot name="_score_region" type="string"></slot>
<slot name="rule" type="string">HealthStatusItemPkg/0</slot>
<slot name="ConceptName" type="string">RENAL ANGLE TENDERNESS</slot>
<slot name="_score_ConceptName" type="string"></slot>
<slot name="SemanticType" type="string">Sign or Symptom</slot>
<slot name="BodyLocations" type="string">COSTOVERTEBRAL ANGLE</slot>
<slot name="_score_BodyLocations" type="string"></slot>
<slot name="SeverityStrings" type="string">NO</slot>
<slot name="UMLS_CUI" type="string">C0235634</slot>
<slot name="DaysBeforeDeath" type="int">0</slot>
<slot name="PAIN" type="string">Y</slot>
<slot name="MaxPain" type="int">1</slot>
<slot name="SeverityScale" type="int">0</slot>
<slot name="_score_SeverityScale" type="string"></slot>
<slot name="polarity" type="string">POSITIVE</slot>
<slot name="DocType" type="string"></slot>
<slot name="PatientID" type="int">0</slot>
<slot name="DateObject" type="record"/>
<slot name="enddate" type="date">
<date day="5" month="8" year="1998"/>
</slot>
<slot name="_score_enddate" type="string"></slot>
<slot name="startdate" type="date">
```

```
<date day="5" month="8" year="1998"/>
</slot>
<slot name="_score_startdate" type="string"></slot>
<slot name="Patient" type="string">PATIENT</slot>
<slot name="_score_Patient" type="string"></slot>
<slot name="_keyref" type="record"/>
<slot name="_score" type="string"></slot>
<slot name="_type" type="string"></slot>
</record>
</records>
</infStore>
<?xml version="1.0" encoding="UTF-8"?>
<infStore>
<records>
<record id="0" template="HealthStatusRecord">
<slot name="ScoreType" type="string">HealthStatusRecord</slot>
<slot name="_score_ScoreType" type="string"></slot>
<slot name="source" type="string">C:\i2b2 eval\Subsets\Test\912.txt</slot>
<slot name="_score_source" type="string"></slot>
<slot name="region" type="region">
<region end="1281" start="1271">chest pain</region>
</slot>
<slot name="_score_region" type="string"></slot>
<slot name="rule" type="string">HealthStatusItemPkg/0</slot>
<slot name="ConceptName" type="string">CHEST PAIN UNSPECIFIED</slot>
<slot name="_score_ConceptName" type="string"></slot>
```

<slot name="SemanticType" type="string">Sign or Symptom</slot>  
<slot name="BodyLocations" type="string">CHEST</slot>  
<slot name="\_score\_BodyLocations" type="string"></slot>  
<slot name="SeverityStrings" type="string"></slot>  
<slot name="UMLS\_CUI" type="string">C1535568</slot>  
<slot name="DaysBeforeDeath" type="int">0</slot>  
<slot name="PAIN" type="string">Y</slot>  
<slot name="MaxPain" type="int">1</slot>  
<slot name="SeverityScale" type="int">1</slot>  
<slot name="\_score\_SeverityScale" type="string"></slot>  
<slot name="polarity" type="string">POSITIVE</slot>  
<slot name="DocType" type="string"></slot>  
<slot name="PatientID" type="int">0</slot>  
<slot name="DateObject" type="record"/>  
<slot name="enddate" type="date">  
<date day="15" month="10" year="1999"/>  
</slot>  
<slot name="\_score\_enddate" type="string"></slot>  
<slot name="startdate" type="date">  
<date day="15" month="10" year="1999"/>  
</slot>  
<slot name="\_score\_startdate" type="string"></slot>  
<slot name="Patient" type="string">PATIENT</slot>  
<slot name="\_score\_Patient" type="string"></slot>  
<slot name="\_keyref" type="record"/>  
<slot name="\_score" type="string"></slot>

```
<slot name="_type" type="string"></slot>
</record>
<record id="1" template="HealthStatusRecord">
<slot name="ScoreType" type="string">HealthStatusRecord</slot>
<slot name="_score_ScoreType" type="string"></slot>
<slot name="source" type="string">C:\i2b2 eval\Subsets\Test\912.txt</slot>
<slot name="_score_source" type="string"></slot>
<slot name="region" type="region">
<region end="1428" start="1419">pain free</region>
</slot>
<slot name="_score_region" type="string"></slot>
<slot name="rule" type="string">HealthStatusItemPkg/0</slot>
<slot name="ConceptName" type="string">ABSENCE OF PAIN</slot>
<slot name="_score_ConceptName" type="string"></slot>
<slot name="SemanticType" type="string">Sign or Symptom</slot>
<slot name="BodyLocations" type="string"></slot>
<slot name="_score_BodyLocations" type="string"></slot>
<slot name="SeverityStrings" type="string"></slot>
<slot name="UMLS_CUI" type="string">C0234225</slot>
<slot name="DaysBeforeDeath" type="int">0</slot>
<slot name="PAIN" type="string">Y</slot>
<slot name="MaxPain" type="int">1</slot>
<slot name="SeverityScale" type="int">0</slot>
<slot name="_score_SeverityScale" type="string"></slot>
<slot name="polarity" type="string">POSITIVE</slot>
<slot name="DocType" type="string"></slot>
```



```
<slot name="PatientID" type="int">0</slot>
<slot name="DateObject" type="record"/>
<slot name="enddate" type="date">
<date day="15" month="10" year="1999"/>
</slot>
<slot name="_score_enddate" type="string"></slot>
<slot name="startdate" type="date">
<date day="15" month="10" year="1999"/>
</slot>
<slot name="_score_startdate" type="string"></slot>
<slot name="Patient" type="string">PATIENT</slot>
<slot name="_score_Patient" type="string"></slot>
<slot name="_keyref" type="record"/>
<slot name="_score" type="string"></slot>
<slot name="_type" type="string"></slot>
</record>
<record id="2" template="HealthStatusRecord">
<slot name="ScoreType" type="string">HealthStatusRecord</slot>
<slot name="_score_ScoreType" type="string"></slot>
<slot name="source" type="string">C:\i2b2 eval\Subsets\Test\912.txt</slot>
<slot name="_score_source" type="string"></slot>
<slot name="region" type="region">
<region end="3191" start="3185">angina</region>
</slot>
<slot name="_score_region" type="string"></slot>
<slot name="rule" type="string">HealthStatusItemPkg/0</slot>
```

<slot name="ConceptName" type="string">ANGINA PECTORIS</slot>  
<slot name="\_score\_ConceptName" type="string"></slot>  
<slot name="SemanticType" type="string">Sign or Symptom</slot>  
<slot name="BodyLocations" type="string">CHEST</slot>  
<slot name="\_score\_BodyLocations" type="string"></slot>  
<slot name="SeverityStrings" type="string"></slot>  
<slot name="UMLS\_CUI" type="string">C0002962</slot>  
<slot name="DaysBeforeDeath" type="int">0</slot>  
<slot name="PAIN" type="string">Y</slot>  
<slot name="MaxPain" type="int">1</slot>  
<slot name="SeverityScale" type="int">0</slot>  
<slot name="\_score\_SeverityScale" type="string"></slot>  
<slot name="polarity" type="string">POSITIVE</slot>  
<slot name="DocType" type="string"></slot>  
<slot name="PatientID" type="int">0</slot>  
<slot name="DateObject" type="record"/>  
<slot name="enddate" type="date">  
<date day="17" month="10" year="1999"/>  
</slot>  
<slot name="\_score\_enddate" type="string"></slot>  
<slot name="startdate" type="date">  
<date day="17" month="10" year="1999"/>  
</slot>  
<slot name="\_score\_startdate" type="string"></slot>  
<slot name="Patient" type="string">PATIENT</slot>  
<slot name="\_score\_Patient" type="string"></slot>

```
<slot name="_keyref" type="record"/>
<slot name="_score" type="string"></slot>
<slot name="_type" type="string"></slot>
</record>
<record id="3" template="HealthStatusRecord">
<slot name="ScoreType" type="string">HealthStatusRecord</slot>
<slot name="_score_ScoreType" type="string"></slot>
<slot name="source" type="string">C:\i2b2 eval\Subsets\Test\912.txt</slot>
<slot name="_score_source" type="string"></slot>
<slot name="region" type="region">
<region end="1043" start="1033">discomfort</region>
</slot>
<slot name="_score_region" type="string"></slot>
<slot name="rule" type="string">HealthStatusItemPkg/0</slot>
<slot name="ConceptName" type="string">CHEST PAIN UNSPECIFIED</slot>
<slot name="_score_ConceptName" type="string"></slot>
<slot name="SemanticType" type="string">Sign or Symptom</slot>
<slot name="BodyLocations" type="string">CHEST</slot>
<slot name="_score_BodyLocations" type="string"></slot>
<slot name="SeverityStrings" type="string"></slot>
<slot name="UMLS_CUI" type="string">C1535568</slot>
<slot name="DaysBeforeDeath" type="int">0</slot>
<slot name="PAIN" type="string">Y</slot>
<slot name="MaxPain" type="int">1</slot>
<slot name="SeverityScale" type="int">1</slot>
<slot name="_score_SeverityScale" type="string"></slot>
```

```

<slot name="polarity" type="string">POSITIVE</slot>
<slot name="DocType" type="string"></slot>
<slot name="PatientID" type="int">0</slot>
<slot name="DateObject" type="record"/>
<slot name="enddate" type="date">
<date day="15" month="10" year="1999"/>
</slot>
<slot name="_score_enddate" type="string"></slot>
<slot name="startdate" type="date">
<date day="14" month="10" year="1999"/>
</slot>
<slot name="_score_startdate" type="string"></slot>
<slot name="Patient" type="string">PATIENT</slot>
<slot name="_score_Patient" type="string"></slot>
<slot name="_keyref" type="record"/>
<slot name="_score" type="string"></slot>
<slot name="_type" type="string"></slot>
</record>
</records>
</infStore>

```

## **XML version of all extracted and scored pain concept mentions from the i2b2 test set**

Please note that for slots of type "region" region start and end numbers are the numbers of tokens from the start of the document

```

<?xml version="1.0" encoding="UTF-8"?>
<infStore>

```

```
<records>
<record id="0" template="HealthStatusRecord">
<slot name="ScoreType" type="string">HealthStatusRecord</slot>
<slot name="_score_ScoreType" type="string">CORRECT</slot>
<slot name="source" type="string">C:\i2b2 eval\Subsets\Test\110.txt</slot>
<slot name="_score_source" type="string">CORRECT</slot>
<slot name="region" type="region">
<region end="1913" start="1904">back pain</region>
</slot>
<slot name="_score_region" type="string">CORRECT</slot>
<slot name="rule" type="string">HealthStatusItemPkg/0</slot>
<slot name="ConceptName" type="string">BACK PAINS</slot>
<slot name="_score_ConceptName" type="string">CORRECT</slot>
<slot name="SemanticType" type="string">Sign or Symptom</slot>
<slot name="BodyLocations" type="string">BACK</slot>
<slot name="_score_BodyLocations" type="string">CORRECT</slot>
<slot name="SeverityStrings" type="string"></slot>
<slot name="UMLS_CUI" type="string">C0004604</slot>
<slot name="DaysBeforeDeath" type="int">0</slot>
<slot name="PAIN" type="string">Y</slot>
<slot name="MaxPain" type="int">1</slot>
<slot name="SeverityScale" type="int">1</slot>
<slot name="_score_SeverityScale" type="string">CORRECT</slot>
<slot name="polarity" type="string">POSITIVE</slot>
<slot name="DocType" type="string"></slot>
```

```
<slot name="PatientID" type="int">0</slot>
<slot name="DateObject" type="record"/>
<slot name="enddate" type="date">
<date day="24" month="12" year="1998"/>
</slot>
<slot name="_score_enddate" type="string">CORRECT</slot>
<slot name="startdate" type="date">
<date day="24" month="12" year="1998"/>
</slot>
<slot name="_score_startdate" type="string">CORRECT</slot>
<slot name="Patient" type="string">PATIENT</slot>
<slot name="_score_Patient" type="string">CORRECT</slot>
<slot name="_keyref" type="record"/>
<slot name="_score" type="string">CORRECT</slot>
<slot name="_type" type="string"></slot>
</record>
<record id="1" template="HealthStatusRecord">
<slot name="ScoreType" type="string">HealthStatusRecord</slot>
<slot name="_score_ScoreType" type="string"></slot>
<slot name="source" type="string">C:\i2b2 eval\Subsets\Test\110.txt</slot>
<slot name="_score_source" type="string"></slot>
<slot name="region" type="region">
<region end="2719" start="2709">discomfort</region>
</slot>
<slot name="_score_region" type="string"></slot>
```

<slot name="rule" type="string">HealthStatusItemPkg/0</slot>  
<slot name="ConceptName" type="string">DISCOMFORT</slot>  
<slot name="\_score\_ConceptName" type="string"></slot>  
<slot name="SemanticType" type="string">Sign or Symptom</slot>  
<slot name="BodyLocations" type="string">ABDOMEN</slot>  
<slot name="\_score\_BodyLocations" type="string"></slot>  
<slot name="SeverityStrings" type="string">MINIMAL</slot>  
<slot name="UMLS\_CUI" type="string">C2737161</slot>  
<slot name="DaysBeforeDeath" type="int">0</slot>  
<slot name="PAIN" type="string">Y</slot>  
<slot name="MaxPain" type="int">1</slot>  
<slot name="SeverityScale" type="int">1</slot>  
<slot name="\_score\_SeverityScale" type="string"></slot>  
<slot name="polarity" type="string">POSITIVE</slot>  
<slot name="DocType" type="string"></slot>  
<slot name="PatientID" type="int">0</slot>  
<slot name="DateObject" type="record"/>  
<slot name="enddate" type="date">  
<date day="29" month="12" year="1998"/>  
</slot>  
<slot name="\_score\_enddate" type="string"></slot>  
<slot name="startdate" type="date">  
<date day="25" month="12" year="1998"/>  
</slot>  
<slot name="\_score\_startdate" type="string"></slot>

```
<slot name="Patient" type="string">PATIENT</slot>
<slot name="_score_Patient" type="string"></slot>
<slot name="_keyref" type="record"/>
<slot name="_score" type="string"></slot>
<slot name="_type" type="string"></slot>
</record>

<record id="2" template="HealthStatusRecord">
<slot name="ScoreType" type="string">HealthStatusRecord</slot>
<slot name="_score_ScoreType" type="string"></slot>
<slot name="source" type="string">C:\i2b2 eval\Subsets\Test\110.txt</slot>
<slot name="_score_source" type="string"></slot>
<slot name="region" type="region">
<region end="2719" start="2709">discomfort</region>
</slot>
<slot name="_score_region" type="string"></slot>
<slot name="rule" type="string">HealthStatusItemPkg/0</slot>
<slot name="ConceptName" type="string">DISCOMFORT</slot>
<slot name="_score_ConceptName" type="string"></slot>
<slot name="SemanticType" type="string">Sign or Symptom</slot>
<slot name="BodyLocations" type="string">ABDOMEN</slot>
<slot name="_score_BodyLocations" type="string"></slot>
<slot name="SeverityStrings" type="string">MINIMAL</slot>
<slot name="UMLS_CUI" type="string">C2737161</slot>
<slot name="DaysBeforeDeath" type="int">0</slot>
<slot name="PAIN" type="string">Y</slot>
```



```
<slot name="MaxPain" type="int">1</slot>
<slot name="SeverityScale" type="int">1</slot>
<slot name="_score_SeverityScale" type="string"></slot>
<slot name="polarity" type="string">POSITIVE</slot>
<slot name="DocType" type="string"></slot>
<slot name="PatientID" type="int">0</slot>
<slot name="DateObject" type="record"/>
<slot name="enddate" type="date">
<date day="29" month="12" year="1998"/>
</slot>
<slot name="_score_enddate" type="string"></slot>
<slot name="startdate" type="date">
<date day="25" month="12" year="1998"/>
</slot>
<slot name="_score_startdate" type="string"></slot>
<slot name="Patient" type="string">PATIENT</slot>
<slot name="_score_Patient" type="string"></slot>
<slot name="_keyref" type="record"/>
<slot name="_score" type="string"></slot>
<slot name="_type" type="string"></slot>
</record>
<record id="3" template="HealthStatusRecord">
<slot name="ScoreType" type="string">HealthStatusRecord</slot>
<slot name="_score_ScoreType" type="string">CORRECT</slot>
<slot name="source" type="string">C:\i2b2 eval\Subsets\Test\110.txt</slot>
```

<slot name="\_score\_source" type="string">CORRECT</slot>  
<slot name="region" type="region">  
<region end="2719" start="2709">discomfort</region>  
</slot>  
<slot name="\_score\_region" type="string">CORRECT</slot>  
<slot name="rule" type="string">HealthStatusItemPkg/0</slot>  
<slot name="ConceptName" type="string">DISCOMFORT</slot>  
<slot name="\_score\_ConceptName" type="string">CORRECT</slot>  
<slot name="SemanticType" type="string">Sign or Symptom</slot>  
<slot name="BodyLocations" type="string"></slot>  
<slot name="\_score\_BodyLocations" type="string">MISSING</slot>  
<slot name="SeverityStrings" type="string">MINIMAL</slot>  
<slot name="UMLS\_CUI" type="string">C2737161</slot>  
<slot name="DaysBeforeDeath" type="int">0</slot>  
<slot name="PAIN" type="string">Y</slot>  
<slot name="MaxPain" type="int">1</slot>  
<slot name="SeverityScale" type="int">1</slot>  
<slot name="\_score\_SeverityScale" type="string">CORRECT</slot>  
<slot name="polarity" type="string">POSITIVE</slot>  
<slot name="DocType" type="string"></slot>  
<slot name="PatientID" type="int">0</slot>  
<slot name="DateObject" type="record"/>  
<slot name="enddate" type="date">  
<date day="22" month="12" year="1998"/>  
</slot>

```
<slot name="_score_enddate" type="string">INCORRECT</slot>
<slot name="startdate" type="date">
<date day="22" month="12" year="1998"/>
</slot>
<slot name="_score_startdate" type="string">INCORRECT</slot>
<slot name="Patient" type="string">PATIENT</slot>
<slot name="_score_Patient" type="string">CORRECT</slot>
<slot name="_keyref" type="record">
<record ref="2"/>
</slot>
<slot name="_score" type="string">INCORRECT</slot>
<slot name="_type" type="string"></slot>
</record>
</records>
</infStore>
<?xml version="1.0" encoding="UTF-8"?>
<infStore>
<records>
<record id="0" template="HealthStatusRecord">
<slot name="ScoreType" type="string">HealthStatusRecord</slot>
<slot name="_score_ScoreType" type="string"></slot>
<slot name="source" type="string">C:\i2b2 eval\Subsets\Test\122.txt</slot>
<slot name="_score_source" type="string"></slot>
<slot name="region" type="region">
<region end="415" start="401">right hip pain</region>
```

</slot>  
<slot name="\_score\_region" type="string"></slot>  
<slot name="rule" type="string">HealthStatusItemPkg/0</slot>  
<slot name="ConceptName" type="string">RIGHT HIP JOINT PAIN</slot>  
<slot name="\_score\_ConceptName" type="string"></slot>  
<slot name="SemanticType" type="string">Sign or Symptom</slot>  
<slot name="BodyLocations" type="string">RIGHT HIP REGION STRUCTURE</slot>  
<slot name="\_score\_BodyLocations" type="string"></slot>  
<slot name="SeverityStrings" type="string">PROGRESSIVE</slot>  
<slot name="UMLS\_CUI" type="string">C2202100</slot>  
<slot name="DaysBeforeDeath" type="int">0</slot>  
<slot name="PAIN" type="string">Y</slot>  
<slot name="MaxPain" type="int">1</slot>  
<slot name="SeverityScale" type="int">1</slot>  
<slot name="\_score\_SeverityScale" type="string"></slot>  
<slot name="polarity" type="string">POSITIVE</slot>  
<slot name="DocType" type="string"></slot>  
<slot name="PatientID" type="int">0</slot>  
<slot name="DateObject" type="record"/>  
<slot name="enddate" type="date">  
<date day="11" month="12" year="1997"/>  
</slot>  
<slot name="\_score\_enddate" type="string"></slot>  
<slot name="startdate" type="date">  
<date day="11" month="12" year="1997"/>

```
</slot>
<slot name="_score_startdate" type="string"></slot>
<slot name="Patient" type="string">PATIENT</slot>
<slot name="_score_Patient" type="string"></slot>
<slot name="_keyref" type="record"/>
<slot name="_score" type="string"></slot>
<slot name="_type" type="string"></slot>
</record>
<record id="1" template="HealthStatusRecord">
<slot name="ScoreType" type="string">HealthStatusRecord</slot>
<slot name="_score_ScoreType" type="string">CORRECT</slot>
<slot name="source" type="string">C:\i2b2 eval\Subsets\Test\122.txt</slot>
<slot name="_score_source" type="string">CORRECT</slot>
<slot name="region" type="region">
<region end="415" start="401">right hip pain</region>
</slot>
<slot name="_score_region" type="string">CORRECT</slot>
<slot name="rule" type="string">HealthStatusItemPkg/0</slot>
<slot name="ConceptName" type="string">RIGHT HIP JOINT PAIN</slot>
<slot name="_score_ConceptName" type="string">CORRECT</slot>
<slot name="SemanticType" type="string">Sign or Symptom</slot>
<slot name="BodyLocations" type="string"></slot>
<slot name="_score_BodyLocations" type="string">MISSING</slot>
<slot name="SeverityStrings" type="string">PROGRESSIVE</slot>
<slot name="UMLS_CUI" type="string">C2202100</slot>
```

```
<slot name="DaysBeforeDeath" type="int">0</slot>
<slot name="PAIN" type="string">Y</slot>
<slot name="MaxPain" type="int">1</slot>
<slot name="SeverityScale" type="int">1</slot>
<slot name="_score_SeverityScale" type="string">CORRECT</slot>
<slot name="polarity" type="string">POSITIVE</slot>
<slot name="DocType" type="string"></slot>
<slot name="PatientID" type="int">0</slot>
<slot name="DateObject" type="record"/>
<slot name="enddate" type="date">
<date day="11" month="12" year="1997"/>
</slot>
<slot name="_score_enddate" type="string">CORRECT</slot>
<slot name="startdate" type="date">
<date day="11" month="12" year="1997"/>
</slot>
<slot name="_score_startdate" type="string">CORRECT</slot>
<slot name="Patient" type="string">PATIENT</slot>
<slot name="_score_Patient" type="string">CORRECT</slot>
<slot name="_keyref" type="record">
<record ref="0"/>
</slot>
<slot name="_score" type="string">INCORRECT</slot>
<slot name="_type" type="string"></slot>
</record>
```

```
<record id="2" template="HealthStatusRecord">
  <slot name="ScoreType" type="string">HealthStatusRecord</slot>
  <slot name="_score_ScoreType" type="string">SPURIOUS</slot>
  <slot name="source" type="string">C:\i2b2 eval\Subsets\Test\122.txt</slot>
  <slot name="_score_source" type="string">SPURIOUS</slot>
  <slot name="region" type="region">
    <region end="483" start="479">pain</region>
  </slot>
  <slot name="_score_region" type="string">SPURIOUS</slot>
  <slot name="rule" type="string">HealthStatusItemPkg/0</slot>
  <slot name="ConceptName" type="string">PAIN</slot>
  <slot name="_score_ConceptName" type="string">SPURIOUS</slot>
  <slot name="SemanticType" type="string">Sign or Symptom</slot>
  <slot name="BodyLocations" type="string"></slot>
  <slot name="_score_BodyLocations" type="string"></slot>
  <slot name="SeverityStrings" type="string">RELIEF OF</slot>
  <slot name="UMLS_CUI" type="string">C0030193</slot>
  <slot name="DaysBeforeDeath" type="int">0</slot>
  <slot name="PAIN" type="string">Y</slot>
  <slot name="MaxPain" type="int">1</slot>
  <slot name="SeverityScale" type="int">0</slot>
  <slot name="_score_SeverityScale" type="string">SPURIOUS</slot>
  <slot name="polarity" type="string">POSITIVE</slot>
  <slot name="DocType" type="string"></slot>
  <slot name="PatientID" type="int">0</slot>
```

```
<slot name="DateObject" type="record"/>
<slot name="enddate" type="date">
<date day="11" month="12" year="1997"/>
</slot>
<slot name="_score_enddate" type="string">SPURIOUS</slot>
<slot name="startdate" type="date">
<date day="11" month="12" year="1997"/>
</slot>
<slot name="_score_startdate" type="string">SPURIOUS</slot>
<slot name="Patient" type="string">PATIENT</slot>
<slot name="_score_Patient" type="string">SPURIOUS</slot>
<slot name="_keyref" type="record"/>
<slot name="_score" type="string">SPURIOUS</slot>
<slot name="_type" type="string"></slot>
</record>
<record id="3" template="HealthStatusRecord">
<slot name="ScoreType" type="string">HealthStatusRecord</slot>
<slot name="_score_ScoreType" type="string"></slot>
<slot name="source" type="string">C:\i2b2 eval\Subsets\Test\122.txt</slot>
<slot name="_score_source" type="string"></slot>
<slot name="region" type="region">
<region end="415" start="401">right hip pain</region>
</slot>
<slot name="_score_region" type="string"></slot>
<slot name="rule" type="string">HealthStatusItemPkg/0</slot>
```



<slot name="ConceptName" type="string">RIGHT HIP JOINT PAIN</slot>  
<slot name="\_score\_ConceptName" type="string"></slot>  
<slot name="SemanticType" type="string">Sign or Symptom</slot>  
<slot name="BodyLocations" type="string">RIGHT HIP REGION STRUCTURE</slot>  
<slot name="\_score\_BodyLocations" type="string"></slot>  
<slot name="SeverityStrings" type="string">PROGRESSIVE</slot>  
<slot name="UMLS\_CUI" type="string">C2202100</slot>  
<slot name="DaysBeforeDeath" type="int">0</slot>  
<slot name="PAIN" type="string">Y</slot>  
<slot name="MaxPain" type="int">1</slot>  
<slot name="SeverityScale" type="int">1</slot>  
<slot name="\_score\_SeverityScale" type="string"></slot>  
<slot name="polarity" type="string">POSITIVE</slot>  
<slot name="DocType" type="string"></slot>  
<slot name="PatientID" type="int">0</slot>  
<slot name="DateObject" type="record"/>  
<slot name="enddate" type="date">  
<date day="11" month="12" year="1997"/>  
</slot>  
<slot name="\_score\_enddate" type="string"></slot>  
<slot name="startdate" type="date">  
<date day="11" month="12" year="1997"/>  
</slot>  
<slot name="\_score\_startdate" type="string"></slot>  
<slot name="Patient" type="string">PATIENT</slot>

```
<slot name="_score_Patient" type="string"></slot>
<slot name="_keyref" type="record"/>
<slot name="_score" type="string"></slot>
<slot name="_type" type="string"></slot>
</record>
</records>
</infStore>
<?xml version="1.0" encoding="UTF-8"?>
<infStore>
<records>
<record id="0" template="HealthStatusRecord">
<slot name="ScoreType" type="string">HealthStatusRecord</slot>
<slot name="_score_ScoreType" type="string"></slot>
<slot name="source" type="string">C:\i2b2 eval\Subsets\Test\152.txt</slot>
<slot name="_score_source" type="string"></slot>
<slot name="region" type="region">
<region end="2931" start="2927">pain</region>
</slot>
<slot name="_score_region" type="string"></slot>
<slot name="rule" type="string">HealthStatusItemPkg/0</slot>
<slot name="ConceptName" type="string">PAIN</slot>
<slot name="_score_ConceptName" type="string"></slot>
<slot name="SemanticType" type="string">Sign or Symptom</slot>
<slot name="BodyLocations" type="string"></slot>
<slot name="_score_BodyLocations" type="string"></slot>
```

```
<slot name="SeverityStrings" type="string"></slot>
<slot name="UMLS_CUI" type="string">C0030193</slot>
<slot name="DaysBeforeDeath" type="int">0</slot>
<slot name="PAIN" type="string">Y</slot>
<slot name="MaxPain" type="int">1</slot>
<slot name="SeverityScale" type="int">1</slot>
<slot name="_score_SeverityScale" type="string"></slot>
<slot name="polarity" type="string">POSITIVE</slot>
<slot name="DocType" type="string"></slot>
<slot name="PatientID" type="int">0</slot>
<slot name="DateObject" type="record"/>
<slot name="enddate" type="date">
<date day="15" month="6" year="2005"/>
</slot>
<slot name="_score_enddate" type="string"></slot>
<slot name="startdate" type="date">
<date day="12" month="6" year="2005"/>
</slot>
<slot name="_score_startdate" type="string"></slot>
<slot name="Patient" type="string">PATIENT</slot>
<slot name="_score_Patient" type="string"></slot>
<slot name="_keyref" type="record"/>
<slot name="_score" type="string"></slot>
<slot name="_type" type="string"></slot>
</record>
```

```
<record id="1" template="HealthStatusRecord">
  <slot name="ScoreType" type="string">HealthStatusRecord</slot>
  <slot name="_score_ScoreType" type="string"></slot>
  <slot name="source" type="string">C:\i2b2 eval\Subsets\Test\152.txt</slot>
  <slot name="_score_source" type="string"></slot>
  <slot name="region" type="region">
    <region end="3027" start="3025">CP</region>
  </slot>
  <slot name="_score_region" type="string"></slot>
  <slot name="rule" type="string">HealthStatusItemPkg/0</slot>
  <slot name="ConceptName" type="string">CHEST PAIN UNSPECIFIED</slot>
  <slot name="_score_ConceptName" type="string"></slot>
  <slot name="SemanticType" type="string">Sign or Symptom</slot>
  <slot name="BodyLocations" type="string">CHEST</slot>
  <slot name="_score_BodyLocations" type="string"></slot>
  <slot name="SeverityStrings" type="string"></slot>
  <slot name="UMLS_CUI" type="string">C1535568</slot>
  <slot name="DaysBeforeDeath" type="int">0</slot>
  <slot name="PAIN" type="string">Y</slot>
  <slot name="MaxPain" type="int">1</slot>
  <slot name="SeverityScale" type="int">1</slot>
  <slot name="_score_SeverityScale" type="string"></slot>
  <slot name="polarity" type="string">POSITIVE</slot>
  <slot name="DocType" type="string"></slot>
  <slot name="PatientID" type="int">0</slot>
```

```
<slot name="DateObject" type="record"/>
<slot name="enddate" type="date">
<date day="14" month="6" year="2005"/>
</slot>
<slot name="_score_enddate" type="string"></slot>
<slot name="startdate" type="date">
<date day="14" month="6" year="2005"/>
</slot>
<slot name="_score_startdate" type="string"></slot>
<slot name="Patient" type="string">PATIENT</slot>
<slot name="_score_Patient" type="string"></slot>
<slot name="_keyref" type="record"/>
<slot name="_score" type="string"></slot>
<slot name="_type" type="string"></slot>
</record>
<record id="2" template="HealthStatusRecord">
<slot name="ScoreType" type="string">HealthStatusRecord</slot>
<slot name="_score_ScoreType" type="string"></slot>
<slot name="source" type="string">C:\i2b2 eval\Subsets\Test\152.txt</slot>
<slot name="_score_source" type="string"></slot>
<slot name="region" type="region">
<region end="2917" start="2915">CP</region>
</slot>
<slot name="_score_region" type="string"></slot>
<slot name="rule" type="string">HealthStatusItemPkg/0</slot>
```

<slot name="ConceptName" type="string">CHEST PAIN UNSPECIFIED</slot>  
<slot name="\_score\_ConceptName" type="string"></slot>  
<slot name="SemanticType" type="string">Sign or Symptom</slot>  
<slot name="BodyLocations" type="string">CHEST</slot>  
<slot name="\_score\_BodyLocations" type="string"></slot>  
<slot name="SeverityStrings" type="string">INTERMITTENT</slot>  
<slot name="UMLS\_CUI" type="string">C1535568</slot>  
<slot name="DaysBeforeDeath" type="int">0</slot>  
<slot name="PAIN" type="string">Y</slot>  
<slot name="MaxPain" type="int">1</slot>  
<slot name="SeverityScale" type="int">1</slot>  
<slot name="\_score\_SeverityScale" type="string"></slot>  
<slot name="polarity" type="string">POSITIVE</slot>  
<slot name="DocType" type="string"></slot>  
<slot name="PatientID" type="int">0</slot>  
<slot name="DateObject" type="record"/>  
<slot name="enddate" type="date">  
<date day="15" month="6" year="2005"/>  
</slot>  
<slot name="\_score\_enddate" type="string"></slot>  
<slot name="startdate" type="date">  
<date day="12" month="6" year="2005"/>  
</slot>  
<slot name="\_score\_startdate" type="string"></slot>  
<slot name="Patient" type="string">PATIENT</slot>

```
<slot name="_score_Patient" type="string"></slot>
<slot name="_keyref" type="record"/>
<slot name="_score" type="string"></slot>
<slot name="_type" type="string"></slot>
</record>
<record id="3" template="HealthStatusRecord">
<slot name="ScoreType" type="string">HealthStatusRecord</slot>
<slot name="_score_ScoreType" type="string"></slot>
<slot name="source" type="string">C:\i2b2 eval\Subsets\Test\152.txt</slot>
<slot name="_score_source" type="string"></slot>
<slot name="region" type="region">
<region end="2917" start="2915">CP</region>
</slot>
<slot name="_score_region" type="string"></slot>
<slot name="rule" type="string">HealthStatusItemPkg/0</slot>
<slot name="ConceptName" type="string">CHEST PAIN UNSPECIFIED</slot>
<slot name="_score_ConceptName" type="string"></slot>
<slot name="SemanticType" type="string">Sign or Symptom</slot>
<slot name="BodyLocations" type="string">CHEST</slot>
<slot name="_score_BodyLocations" type="string"></slot>
<slot name="SeverityStrings" type="string">INTERMITTENT</slot>
<slot name="UMLS_CUI" type="string">C1535568</slot>
<slot name="DaysBeforeDeath" type="int">0</slot>
<slot name="PAIN" type="string">Y</slot>
<slot name="MaxPain" type="int">1</slot>
```

```
<slot name="SeverityScale" type="int">1</slot>
<slot name="_score_SeverityScale" type="string"></slot>
<slot name="polarity" type="string">POSITIVE</slot>
<slot name="DocType" type="string"></slot>
<slot name="PatientID" type="int">0</slot>
<slot name="DateObject" type="record"/>
<slot name="enddate" type="date">
<date day="15" month="6" year="2005"/>
</slot>
<slot name="_score_enddate" type="string"></slot>
<slot name="startdate" type="date">
<date day="12" month="6" year="2005"/>
</slot>
<slot name="_score_startdate" type="string"></slot>
<slot name="Patient" type="string">PATIENT</slot>
<slot name="_score_Patient" type="string"></slot>
<slot name="_keyref" type="record"/>
<slot name="_score" type="string"></slot>
<slot name="_type" type="string"></slot>
</record>
<record id="4" template="HealthStatusRecord">
<slot name="ScoreType" type="string">HealthStatusRecord</slot>
<slot name="_score_ScoreType" type="string">CORRECT</slot>
<slot name="source" type="string">C:\i2b2 eval\Subsets\Test\152.txt</slot>
<slot name="_score_source" type="string">CORRECT</slot>
```



<slot name="region" type="region">  
<region end="2917" start="2915">CP</region>  
</slot>  
<slot name="\_score\_region" type="string">CORRECT</slot>  
<slot name="rule" type="string">HealthStatusItemPkg/0</slot>  
<slot name="ConceptName" type="string">CHEST PAIN</slot>  
<slot name="\_score\_ConceptName" type="string">INCORRECT</slot>  
<slot name="SemanticType" type="string">Sign or Symptom</slot>  
<slot name="BodyLocations" type="string">CHEST</slot>  
<slot name="\_score\_BodyLocations" type="string">CORRECT</slot>  
<slot name="SeverityStrings" type="string">INTERMITTENT</slot>  
<slot name="UMLS\_CUI" type="string">C0008031</slot>  
<slot name="DaysBeforeDeath" type="int">0</slot>  
<slot name="PAIN" type="string">Y</slot>  
<slot name="MaxPain" type="int">1</slot>  
<slot name="SeverityScale" type="int">1</slot>  
<slot name="\_score\_SeverityScale" type="string">CORRECT</slot>  
<slot name="polarity" type="string">POSITIVE</slot>  
<slot name="DocType" type="string"></slot>  
<slot name="PatientID" type="int">0</slot>  
<slot name="DateObject" type="record"/>  
<slot name="enddate" type="date">  
<date day="12" month="6" year="2005"/>  
</slot>  
<slot name="\_score\_enddate" type="string">INCORRECT</slot>

```
<slot name="startdate" type="date">
<date day="12" month="6" year="2005"/>
</slot>
<slot name="_score_startdate" type="string">CORRECT</slot>
<slot name="Patient" type="string">PATIENT</slot>
<slot name="_score_Patient" type="string">CORRECT</slot>
<slot name="_keyref" type="record">
<record ref="3"/>
</slot>
<slot name="_score" type="string">INCORRECT</slot>
<slot name="_type" type="string"></slot>
</record>
<record id="5" template="HealthStatusRecord">
<slot name="ScoreType" type="string">HealthStatusRecord</slot>
<slot name="_score_ScoreType" type="string"></slot>
<slot name="source" type="string">C:\i2b2 eval\Subsets\Test\152.txt</slot>
<slot name="_score_source" type="string"></slot>
<slot name="region" type="region">
<region end="2931" start="2927">pain</region>
</slot>
<slot name="_score_region" type="string"></slot>
<slot name="rule" type="string">HealthStatusItemPkg/0</slot>
<slot name="ConceptName" type="string">PAIN</slot>
<slot name="_score_ConceptName" type="string"></slot>
<slot name="SemanticType" type="string">Sign or Symptom</slot>
```

<slot name="BodyLocations" type="string"></slot>  
<slot name="\_score\_BodyLocations" type="string"></slot>  
<slot name="SeverityStrings" type="string"></slot>  
<slot name="UMLS\_CUI" type="string">C0030193</slot>  
<slot name="DaysBeforeDeath" type="int">0</slot>  
<slot name="PAIN" type="string">Y</slot>  
<slot name="MaxPain" type="int">1</slot>  
<slot name="SeverityScale" type="int">1</slot>  
<slot name="\_score\_SeverityScale" type="string"></slot>  
<slot name="polarity" type="string">POSITIVE</slot>  
<slot name="DocType" type="string"></slot>  
<slot name="PatientID" type="int">0</slot>  
<slot name="DateObject" type="record"/>  
<slot name="enddate" type="date">  
<date day="15" month="6" year="2005"/>  
</slot>  
<slot name="\_score\_enddate" type="string"></slot>  
<slot name="startdate" type="date">  
<date day="12" month="6" year="2005"/>  
</slot>  
<slot name="\_score\_startdate" type="string"></slot>  
<slot name="Patient" type="string">PATIENT</slot>  
<slot name="\_score\_Patient" type="string"></slot>  
<slot name="\_keyref" type="record"/>  
<slot name="\_score" type="string"></slot>

```
<slot name="_type" type="string"></slot>
</record>
<record id="6" template="HealthStatusRecord">
<slot name="ScoreType" type="string">HealthStatusRecord</slot>
<slot name="_score_ScoreType" type="string">CORRECT</slot>
<slot name="source" type="string">C:\i2b2 eval\Subsets\Test\152.txt</slot>
<slot name="_score_source" type="string">CORRECT</slot>
<slot name="region" type="region">
<region end="2931" start="2927">pain</region>
</slot>
<slot name="_score_region" type="string">CORRECT</slot>
<slot name="rule" type="string">HealthStatusItemPkg/0</slot>
<slot name="ConceptName" type="string">PAIN</slot>
<slot name="_score_ConceptName" type="string">CORRECT</slot>
<slot name="SemanticType" type="string">Sign or Symptom</slot>
<slot name="BodyLocations" type="string"></slot>
<slot name="_score_BodyLocations" type="string"></slot>
<slot name="SeverityStrings" type="string"></slot>
<slot name="UMLS_CUI" type="string">C0030193</slot>
<slot name="DaysBeforeDeath" type="int">0</slot>
<slot name="PAIN" type="string">Y</slot>
<slot name="MaxPain" type="int">1</slot>
<slot name="SeverityScale" type="int">1</slot>
<slot name="_score_SeverityScale" type="string">CORRECT</slot>
<slot name="polarity" type="string">POSITIVE</slot>
```

```
<slot name="DocType" type="string"></slot>
<slot name="PatientID" type="int">0</slot>
<slot name="DateObject" type="record"/>
<slot name="enddate" type="date">
<date day="12" month="6" year="2005"/>
</slot>
<slot name="_score_enddate" type="string">INCORRECT</slot>
<slot name="startdate" type="date">
<date day="12" month="6" year="2005"/>
</slot>
<slot name="_score_startdate" type="string">CORRECT</slot>
<slot name="Patient" type="string">PATIENT</slot>
<slot name="_score_Patient" type="string">CORRECT</slot>
<slot name="_keyref" type="record">
<record ref="5"/>
</slot>
<slot name="_score" type="string">INCORRECT</slot>
<slot name="_type" type="string"></slot>
</record>
<record id="7" template="HealthStatusRecord">
<slot name="ScoreType" type="string">HealthStatusRecord</slot>
<slot name="_score_ScoreType" type="string"></slot>
<slot name="source" type="string">C:\i2b2 eval\Subsets\Test\152.txt</slot>
<slot name="_score_source" type="string"></slot>
<slot name="region" type="region">
```

<region end="3027" start="3025">CP</region>  
</slot>  
<slot name="\_score\_region" type="string"></slot>  
<slot name="rule" type="string">HealthStatusItemPkg/0</slot>  
<slot name="ConceptName" type="string">CHEST PAIN UNSPECIFIED</slot>  
<slot name="\_score\_ConceptName" type="string"></slot>  
<slot name="SemanticType" type="string">Sign or Symptom</slot>  
<slot name="BodyLocations" type="string">CHEST</slot>  
<slot name="\_score\_BodyLocations" type="string"></slot>  
<slot name="SeverityStrings" type="string"></slot>  
<slot name="UMLS\_CUI" type="string">C1535568</slot>  
<slot name="DaysBeforeDeath" type="int">0</slot>  
<slot name="PAIN" type="string">Y</slot>  
<slot name="MaxPain" type="int">1</slot>  
<slot name="SeverityScale" type="int">1</slot>  
<slot name="\_score\_SeverityScale" type="string"></slot>  
<slot name="polarity" type="string">POSITIVE</slot>  
<slot name="DocType" type="string"></slot>  
<slot name="PatientID" type="int">0</slot>  
<slot name="DateObject" type="record"/>  
<slot name="enddate" type="date">  
<date day="14" month="6" year="2005"/>  
</slot>  
<slot name="\_score\_enddate" type="string"></slot>  
<slot name="startdate" type="date">

```
<date day="14" month="6" year="2005"/>
</slot>
<slot name="_score_startdate" type="string"></slot>
<slot name="Patient" type="string">PATIENT</slot>
<slot name="_score_Patient" type="string"></slot>
<slot name="_keyref" type="record"/>
<slot name="_score" type="string"></slot>
<slot name="_type" type="string"></slot>
</record>
<record id="8" template="HealthStatusRecord">
<slot name="ScoreType" type="string">HealthStatusRecord</slot>
<slot name="_score_ScoreType" type="string">CORRECT</slot>
<slot name="source" type="string">C:\i2b2 eval\Subsets\Test\152.txt</slot>
<slot name="_score_source" type="string">CORRECT</slot>
<slot name="region" type="region">
<region end="3027" start="3025">CP</region>
</slot>
<slot name="_score_region" type="string">CORRECT</slot>
<slot name="rule" type="string">HealthStatusItemPkg/0</slot>
<slot name="ConceptName" type="string">CHEST PAIN</slot>
<slot name="_score_ConceptName" type="string">INCORRECT</slot>
<slot name="SemanticType" type="string">Sign or Symptom</slot>
<slot name="BodyLocations" type="string">CHEST</slot>
<slot name="_score_BodyLocations" type="string">CORRECT</slot>
<slot name="SeverityStrings" type="string"></slot>
```

<slot name="UMLS\_CUI" type="string">C0008031</slot>  
<slot name="DaysBeforeDeath" type="int">0</slot>  
<slot name="PAIN" type="string">Y</slot>  
<slot name="MaxPain" type="int">1</slot>  
<slot name="SeverityScale" type="int">1</slot>  
<slot name="\_score\_SeverityScale" type="string">CORRECT</slot>  
<slot name="polarity" type="string">POSITIVE</slot>  
<slot name="DocType" type="string"></slot>  
<slot name="PatientID" type="int">0</slot>  
<slot name="DateObject" type="record"/>  
<slot name="enddate" type="date">  
<date day="12" month="6" year="2005"/>  
</slot>  
<slot name="\_score\_enddate" type="string">INCORRECT</slot>  
<slot name="startdate" type="date">  
<date day="12" month="6" year="2005"/>  
</slot>  
<slot name="\_score\_startdate" type="string">INCORRECT</slot>  
<slot name="Patient" type="string">PATIENT</slot>  
<slot name="\_score\_Patient" type="string">CORRECT</slot>  
<slot name="\_keyref" type="record">  
<record ref="7"/>  
</slot>  
<slot name="\_score" type="string">INCORRECT</slot>  
<slot name="\_type" type="string"></slot>



```
</record>
</records>
</infStore>
<?xml version="1.0" encoding="UTF-8"?>
<infStore>
<records>
<record id="0" template="HealthStatusRecord">
<slot name="ScoreType" type="string">HealthStatusRecord</slot>
<slot name="_score_ScoreType" type="string">SPURIOUS</slot>
<slot name="source" type="string">C:\i2b2 eval\Subsets\Test\161.txt</slot>
<slot name="_score_source" type="string">SPURIOUS</slot>
<slot name="region" type="region">
<region end="649" start="645">pain</region>
</slot>
<slot name="_score_region" type="string">SPURIOUS</slot>
<slot name="rule" type="string">HealthStatusItemPkg/0</slot>
<slot name="ConceptName" type="string">PAIN</slot>
<slot name="_score_ConceptName" type="string">SPURIOUS</slot>
<slot name="SemanticType" type="string">Sign or Symptom</slot>
<slot name="BodyLocations" type="string"></slot>
<slot name="_score_BodyLocations" type="string"></slot>
<slot name="SeverityStrings" type="string"></slot>
<slot name="UMLS_CUI" type="string">C0030193</slot>
<slot name="DaysBeforeDeath" type="int">0</slot>
<slot name="PAIN" type="string">Y</slot>
```

```
<slot name="MaxPain" type="int">1</slot>
<slot name="SeverityScale" type="int">1</slot>
<slot name="_score_SeverityScale" type="string">SPURIOUS</slot>
<slot name="polarity" type="string">POSITIVE</slot>
<slot name="DocType" type="string"></slot>
<slot name="PatientID" type="int">0</slot>
<slot name="DateObject" type="record"/>
<slot name="enddate" type="date">
<date day="12" month="9" year="1995"/>
</slot>
<slot name="_score_enddate" type="string">SPURIOUS</slot>
<slot name="startdate" type="date">
<date day="12" month="9" year="1995"/>
</slot>
<slot name="_score_startdate" type="string">SPURIOUS</slot>
<slot name="Patient" type="string">PATIENT</slot>
<slot name="_score_Patient" type="string">SPURIOUS</slot>
<slot name="_keyref" type="record"/>
<slot name="_score" type="string">SPURIOUS</slot>
<slot name="_type" type="string"></slot>
</record>
<record id="1" template="HealthStatusRecord">
<slot name="ScoreType" type="string">HealthStatusRecord</slot>
<slot name="_score_ScoreType" type="string">SPURIOUS</slot>
<slot name="source" type="string">C:\i2b2 eval\Subsets\Test\161.txt</slot>
```

<slot name="\_score\_source" type="string">SPURIOUS</slot>  
<slot name="region" type="region">  
<region end="678" start="674">pain</region>  
</slot>  
<slot name="\_score\_region" type="string">SPURIOUS</slot>  
<slot name="rule" type="string">HealthStatusItemPkg/0</slot>  
<slot name="ConceptName" type="string">PAIN</slot>  
<slot name="\_score\_ConceptName" type="string">SPURIOUS</slot>  
<slot name="SemanticType" type="string">Sign or Symptom</slot>  
<slot name="BodyLocations" type="string"></slot>  
<slot name="\_score\_BodyLocations" type="string"></slot>  
<slot name="SeverityStrings" type="string">WITHOUT</slot>  
<slot name="UMLS\_CUI" type="string">C0030193</slot>  
<slot name="DaysBeforeDeath" type="int">0</slot>  
<slot name="PAIN" type="string">Y</slot>  
<slot name="MaxPain" type="int">1</slot>  
<slot name="SeverityScale" type="int">0</slot>  
<slot name="\_score\_SeverityScale" type="string">SPURIOUS</slot>  
<slot name="polarity" type="string">POSITIVE</slot>  
<slot name="DocType" type="string"></slot>  
<slot name="PatientID" type="int">0</slot>  
<slot name="DateObject" type="record"/>  
<slot name="enddate" type="date">  
<date day="12" month="9" year="1995"/>  
</slot>

```
<slot name="_score_enddate" type="string">SPURIOUS</slot>
<slot name="startdate" type="date">
<date day="12" month="9" year="1995"/>
</slot>
<slot name="_score_startdate" type="string">SPURIOUS</slot>
<slot name="Patient" type="string">PATIENT</slot>
<slot name="_score_Patient" type="string">SPURIOUS</slot>
<slot name="_keyref" type="record"/>
<slot name="_score" type="string">SPURIOUS</slot>
<slot name="_type" type="string"></slot>
</record>
</records>
</infStore>
<?xml version="1.0" encoding="UTF-8"?>
<infStore>
<records>
<record id="0" template="HealthStatusRecord">
<slot name="ScoreType" type="string">HealthStatusRecord</slot>
<slot name="_score_ScoreType" type="string"></slot>
<slot name="source" type="string">C:\i2b2 eval\Subsets\Test\18.txt</slot>
<slot name="_score_source" type="string"></slot>
<slot name="region" type="region">
<region end="2754" start="2750">pain</region>
</slot>
<slot name="_score_region" type="string"></slot>
```

<slot name="rule" type="string">HealthStatusItemPkg/0</slot>  
<slot name="ConceptName" type="string">PAIN</slot>  
<slot name="\_score\_ConceptName" type="string"></slot>  
<slot name="SemanticType" type="string">Sign or Symptom</slot>  
<slot name="BodyLocations" type="string">PELVIC REGION</slot>  
<slot name="\_score\_BodyLocations" type="string"></slot>  
<slot name="SeverityStrings" type="string">CONTROLLED</slot>  
<slot name="UMLS\_CUI" type="string">C0030193</slot>  
<slot name="DaysBeforeDeath" type="int">0</slot>  
<slot name="PAIN" type="string">Y</slot>  
<slot name="MaxPain" type="int">2</slot>  
<slot name="SeverityScale" type="int">2</slot>  
<slot name="\_score\_SeverityScale" type="string"></slot>  
<slot name="polarity" type="string">POSITIVE</slot>  
<slot name="DocType" type="string"></slot>  
<slot name="PatientID" type="int">0</slot>  
<slot name="DateObject" type="record"/>  
<slot name="enddate" type="date">  
<date day="20" month="6" year="2000"/>  
</slot>  
<slot name="\_score\_enddate" type="string"></slot>  
<slot name="startdate" type="date">  
<date day="20" month="6" year="2000"/>  
</slot>  
<slot name="\_score\_startdate" type="string"></slot>

```
<slot name="Patient" type="string">PATIENT</slot>
<slot name="_score_Patient" type="string"></slot>
<slot name="_keyref" type="record"/>
<slot name="_score" type="string"></slot>
<slot name="_type" type="string"></slot>
</record>
<record id="1" template="HealthStatusRecord">
<slot name="ScoreType" type="string">HealthStatusRecord</slot>
<slot name="_score_ScoreType" type="string"></slot>
<slot name="source" type="string">C:\i2b2 eval\Subsets\Test\18.txt</slot>
<slot name="_score_source" type="string"></slot>
<slot name="region" type="region">
<region end="638" start="628">discomfort</region>
</slot>
<slot name="_score_region" type="string"></slot>
<slot name="rule" type="string">HealthStatusItemPkg/0</slot>
<slot name="ConceptName" type="string">PAIN PELVIC FEMALE</slot>
<slot name="_score_ConceptName" type="string"></slot>
<slot name="SemanticType" type="string">Sign or Symptom</slot>
<slot name="BodyLocations" type="string">PELVIC REGION</slot>
<slot name="_score_BodyLocations" type="string"></slot>
<slot name="SeverityStrings" type="string"></slot>
<slot name="UMLS_CUI" type="string">C0848203</slot>
<slot name="DaysBeforeDeath" type="int">0</slot>
<slot name="PAIN" type="string">Y</slot>
```

```
<slot name="MaxPain" type="int">2</slot>
<slot name="SeverityScale" type="int">1</slot>
<slot name="_score_SeverityScale" type="string"></slot>
<slot name="polarity" type="string">POSITIVE</slot>
<slot name="DocType" type="string"></slot>
<slot name="PatientID" type="int">0</slot>
<slot name="DateObject" type="record"/>
<slot name="enddate" type="date">
<date day="20" month="6" year="2000"/>
</slot>
<slot name="_score_enddate" type="string"></slot>
<slot name="startdate" type="date">
<date day="20" month="6" year="2000"/>
</slot>
<slot name="_score_startdate" type="string"></slot>
<slot name="Patient" type="string">PATIENT</slot>
<slot name="_score_Patient" type="string"></slot>
<slot name="_keyref" type="record"/>
<slot name="_score" type="string"></slot>
<slot name="_type" type="string"></slot>
</record>
<record id="2" template="HealthStatusRecord">
<slot name="ScoreType" type="string">HealthStatusRecord</slot>
<slot name="_score_ScoreType" type="string"></slot>
<slot name="source" type="string">C:\i2b2 eval\Subsets\Test\18.txt</slot>
```

<slot name="\_score\_source" type="string"></slot>  
<slot name="region" type="region">  
<region end="638" start="628">discomfort</region>  
</slot>  
<slot name="\_score\_region" type="string"></slot>  
<slot name="rule" type="string">HealthStatusItemPkg/0</slot>  
<slot name="ConceptName" type="string">PAIN PELVIC FEMALE</slot>  
<slot name="\_score\_ConceptName" type="string"></slot>  
<slot name="SemanticType" type="string">Sign or Symptom</slot>  
<slot name="BodyLocations" type="string">PELVIC REGION</slot>  
<slot name="\_score\_BodyLocations" type="string"></slot>  
<slot name="SeverityStrings" type="string"></slot>  
<slot name="UMLS\_CUI" type="string">C0848203</slot>  
<slot name="DaysBeforeDeath" type="int">0</slot>  
<slot name="PAIN" type="string">Y</slot>  
<slot name="MaxPain" type="int">2</slot>  
<slot name="SeverityScale" type="int">1</slot>  
<slot name="\_score\_SeverityScale" type="string"></slot>  
<slot name="polarity" type="string">POSITIVE</slot>  
<slot name="DocType" type="string"></slot>  
<slot name="PatientID" type="int">0</slot>  
<slot name="DateObject" type="record"/>  
<slot name="enddate" type="date">  
<date day="20" month="6" year="2000"/>  
</slot>



```
<slot name="_score_enddate" type="string"></slot>
<slot name="startdate" type="date">
<date day="20" month="6" year="2000"/>
</slot>
<slot name="_score_startdate" type="string"></slot>
<slot name="Patient" type="string">PATIENT</slot>
<slot name="_score_Patient" type="string"></slot>
<slot name="_keyref" type="record"/>
<slot name="_score" type="string"></slot>
<slot name="_type" type="string"></slot>
</record>
<record id="3" template="HealthStatusRecord">
<slot name="ScoreType" type="string">HealthStatusRecord</slot>
<slot name="_score_ScoreType" type="string">CORRECT</slot>
<slot name="source" type="string">C:\i2b2 eval\Subsets\Test\18.txt</slot>
<slot name="_score_source" type="string">CORRECT</slot>
<slot name="region" type="region">
<region end="638" start="628">discomfort</region>
</slot>
<slot name="_score_region" type="string">CORRECT</slot>
<slot name="rule" type="string">HealthStatusItemPkg/0</slot>
<slot name="ConceptName" type="string">DISCOMFORT</slot>
<slot name="_score_ConceptName" type="string">INCORRECT</slot>
<slot name="SemanticType" type="string">Sign or Symptom</slot>
<slot name="BodyLocations" type="string">PELVIC REGION</slot>
```

<slot name="\_score\_BodyLocations" type="string">CORRECT</slot>  
<slot name="SeverityStrings" type="string"></slot>  
<slot name="UMLS\_CUI" type="string">C2737161</slot>  
<slot name="DaysBeforeDeath" type="int">0</slot>  
<slot name="PAIN" type="string">Y</slot>  
<slot name="MaxPain" type="int">2</slot>  
<slot name="SeverityScale" type="int">1</slot>  
<slot name="\_score\_SeverityScale" type="string">CORRECT</slot>  
<slot name="polarity" type="string">POSITIVE</slot>  
<slot name="DocType" type="string"></slot>  
<slot name="PatientID" type="int">0</slot>  
<slot name="DateObject" type="record"/>  
<slot name="enddate" type="date">  
<date day="20" month="6" year="2000"/>  
</slot>  
<slot name="\_score\_enddate" type="string">CORRECT</slot>  
<slot name="startdate" type="date">  
<date day="20" month="6" year="2000"/>  
</slot>  
<slot name="\_score\_startdate" type="string">CORRECT</slot>  
<slot name="Patient" type="string">PATIENT</slot>  
<slot name="\_score\_Patient" type="string">CORRECT</slot>  
<slot name="\_keyref" type="record">  
<record ref="2"/>  
</slot>

```
<slot name="_score" type="string">INCORRECT</slot>
<slot name="_type" type="string"></slot>
</record>
<record id="4" template="HealthStatusRecord">
<slot name="ScoreType" type="string">HealthStatusRecord</slot>
<slot name="_score_ScoreType" type="string"></slot>
<slot name="source" type="string">C:\i2b2 eval\Subsets\Test\18.txt</slot>
<slot name="_score_source" type="string"></slot>
<slot name="region" type="region">
<region end="2754" start="2750">pain</region>
</slot>
<slot name="_score_region" type="string"></slot>
<slot name="rule" type="string">HealthStatusItemPkg/0</slot>
<slot name="ConceptName" type="string">PAIN</slot>
<slot name="_score_ConceptName" type="string"></slot>
<slot name="SemanticType" type="string">Sign or Symptom</slot>
<slot name="BodyLocations" type="string">PELVIC REGION</slot>
<slot name="_score_BodyLocations" type="string"></slot>
<slot name="SeverityStrings" type="string">CONTROLLED</slot>
<slot name="UMLS_CUI" type="string">C0030193</slot>
<slot name="DaysBeforeDeath" type="int">0</slot>
<slot name="PAIN" type="string">Y</slot>
<slot name="MaxPain" type="int">2</slot>
<slot name="SeverityScale" type="int">2</slot>
<slot name="_score_SeverityScale" type="string"></slot>
```

```
<slot name="polarity" type="string">POSITIVE</slot>
<slot name="DocType" type="string"></slot>
<slot name="PatientID" type="int">0</slot>
<slot name="DateObject" type="record"/>
<slot name="enddate" type="date">
<date day="20" month="6" year="2000"/>
</slot>
<slot name="_score_enddate" type="string"></slot>
<slot name="startdate" type="date">
<date day="20" month="6" year="2000"/>
</slot>
<slot name="_score_startdate" type="string"></slot>
<slot name="Patient" type="string">PATIENT</slot>
<slot name="_score_Patient" type="string"></slot>
<slot name="_keyref" type="record"/>
<slot name="_score" type="string"></slot>
<slot name="_type" type="string"></slot>
</record>
<record id="5" template="HealthStatusRecord">
<slot name="ScoreType" type="string">HealthStatusRecord</slot>
<slot name="_score_ScoreType" type="string">CORRECT</slot>
<slot name="source" type="string">C:\i2b2 eval\Subsets\Test\18.txt</slot>
<slot name="_score_source" type="string">CORRECT</slot>
<slot name="region" type="region">
<region end="2754" start="2750">pain</region>
```

</slot>  
<slot name="\_score\_region" type="string">CORRECT</slot>  
<slot name="rule" type="string">HealthStatusItemPkg/0</slot>  
<slot name="ConceptName" type="string">PAIN</slot>  
<slot name="\_score\_ConceptName" type="string">CORRECT</slot>  
<slot name="SemanticType" type="string">Sign or Symptom</slot>  
<slot name="BodyLocations" type="string"></slot>  
<slot name="\_score\_BodyLocations" type="string">MISSING</slot>  
<slot name="SeverityStrings" type="string">CONTROLLED</slot>  
<slot name="UMLS\_CUI" type="string">C0030193</slot>  
<slot name="DaysBeforeDeath" type="int">0</slot>  
<slot name="PAIN" type="string">Y</slot>  
<slot name="MaxPain" type="int">2</slot>  
<slot name="SeverityScale" type="int">2</slot>  
<slot name="\_score\_SeverityScale" type="string">CORRECT</slot>  
<slot name="polarity" type="string">POSITIVE</slot>  
<slot name="DocType" type="string"></slot>  
<slot name="PatientID" type="int">0</slot>  
<slot name="DateObject" type="record"/>  
<slot name="enddate" type="date">  
<date day="20" month="6" year="2000"/>  
</slot>  
<slot name="\_score\_enddate" type="string">CORRECT</slot>  
<slot name="startdate" type="date">  
<date day="20" month="6" year="2000"/>

```
</slot>
<slot name="_score_startdate" type="string">CORRECT</slot>
<slot name="Patient" type="string">PATIENT</slot>
<slot name="_score_Patient" type="string">CORRECT</slot>
<slot name="_keyref" type="record">
<record ref="4"/>
</slot>
<slot name="_score" type="string">INCORRECT</slot>
<slot name="_type" type="string"></slot>
</record>
</records>
</infStore>
<?xml version="1.0" encoding="UTF-8"?>
<infStore>
<records>
<record id="0" template="HealthStatusRecord">
<slot name="ScoreType" type="string">HealthStatusRecord</slot>
<slot name="_score_ScoreType" type="string">CORRECT</slot>
<slot name="source" type="string">C:\i2b2 eval\Subsets\Test\218.txt</slot>
<slot name="_score_source" type="string">CORRECT</slot>
<slot name="region" type="region">
<region end="2345" start="2341">pain</region>
</slot>
<slot name="_score_region" type="string">CORRECT</slot>
<slot name="rule" type="string">HealthStatusItemPkg/0</slot>
```

<slot name="ConceptName" type="string">PAIN</slot>  
<slot name="\_score\_ConceptName" type="string">CORRECT</slot>  
<slot name="SemanticType" type="string">Sign or Symptom</slot>  
<slot name="BodyLocations" type="string"></slot>  
<slot name="\_score\_BodyLocations" type="string"></slot>  
<slot name="SeverityStrings" type="string">WELL CONTROLLED</slot>  
<slot name="UMLS\_CUI" type="string">C0030193</slot>  
<slot name="DaysBeforeDeath" type="int">0</slot>  
<slot name="PAIN" type="string">Y</slot>  
<slot name="MaxPain" type="int">2</slot>  
<slot name="SeverityScale" type="int">2</slot>  
<slot name="\_score\_SeverityScale" type="string">CORRECT</slot>  
<slot name="polarity" type="string">POSITIVE</slot>  
<slot name="DocType" type="string"></slot>  
<slot name="PatientID" type="int">0</slot>  
<slot name="DateObject" type="record"/>  
<slot name="enddate" type="date">  
<date day="16" month="12" year="2005"/>  
</slot>  
<slot name="\_score\_enddate" type="string">CORRECT</slot>  
<slot name="startdate" type="date">  
<date day="16" month="12" year="2005"/>  
</slot>  
<slot name="\_score\_startdate" type="string">CORRECT</slot>  
<slot name="Patient" type="string">PATIENT</slot>

```
<slot name="_score_Patient" type="string">CORRECT</slot>
<slot name="_keyref" type="record"/>
<slot name="_score" type="string">CORRECT</slot>
<slot name="_type" type="string"></slot>
</record>
</records>
</infStore>
<?xml version="1.0" encoding="UTF-8"?>
<infStore>
<records>
<record id="0" template="HealthStatusRecord">
<slot name="ScoreType" type="string">HealthStatusRecord</slot>
<slot name="_score_ScoreType" type="string"></slot>
<slot name="source" type="string">C:\i2b2 eval\Subsets\Test\235.txt</slot>
<slot name="_score_source" type="string"></slot>
<slot name="region" type="region">
<region end="2846" start="2842">pain</region>
</slot>
<slot name="_score_region" type="string"></slot>
<slot name="rule" type="string">HealthStatusItemPkg/0</slot>
<slot name="ConceptName" type="string">PAIN</slot>
<slot name="_score_ConceptName" type="string"></slot>
<slot name="SemanticType" type="string">Sign or Symptom</slot>
<slot name="BodyLocations" type="string">CHEST</slot>
<slot name="_score_BodyLocations" type="string"></slot>
```



```
<slot name="SeverityStrings" type="string"></slot>
<slot name="UMLS_CUI" type="string">C0030193</slot>
<slot name="DaysBeforeDeath" type="int">0</slot>
<slot name="PAIN" type="string">Y</slot>
<slot name="MaxPain" type="int">1</slot>
<slot name="SeverityScale" type="int">1</slot>
<slot name="_score_SeverityScale" type="string"></slot>
<slot name="polarity" type="string">POSITIVE</slot>
<slot name="DocType" type="string"></slot>
<slot name="PatientID" type="int">0</slot>
<slot name="DateObject" type="record"/>
<slot name="enddate" type="date">
<date day="26" month="5" year="2005"/>
</slot>
<slot name="_score_enddate" type="string"></slot>
<slot name="startdate" type="date">
<date day="26" month="5" year="2005"/>
</slot>
<slot name="_score_startdate" type="string"></slot>
<slot name="Patient" type="string">PATIENT</slot>
<slot name="_score_Patient" type="string"></slot>
<slot name="_keyref" type="record"/>
<slot name="_score" type="string"></slot>
<slot name="_type" type="string"></slot>
</record>
```

```
<record id="1" template="HealthStatusRecord">
  <slot name="ScoreType" type="string">HealthStatusRecord</slot>
  <slot name="_score_ScoreType" type="string"></slot>
  <slot name="source" type="string">C:\i2b2 eval\Subsets\Test\235.txt</slot>
  <slot name="_score_source" type="string"></slot>
  <slot name="region" type="region">
    <region end="2953" start="2951">CP</region>
  </slot>
  <slot name="_score_region" type="string"></slot>
  <slot name="rule" type="string">HealthStatusItemPkg/0</slot>
  <slot name="ConceptName" type="string">CHEST PAIN UNSPECIFIED</slot>
  <slot name="_score_ConceptName" type="string"></slot>
  <slot name="SemanticType" type="string">Sign or Symptom</slot>
  <slot name="BodyLocations" type="string">CHEST</slot>
  <slot name="_score_BodyLocations" type="string"></slot>
  <slot name="SeverityStrings" type="string"></slot>
  <slot name="UMLS_CUI" type="string">C1535568</slot>
  <slot name="DaysBeforeDeath" type="int">0</slot>
  <slot name="PAIN" type="string">Y</slot>
  <slot name="MaxPain" type="int">1</slot>
  <slot name="SeverityScale" type="int">1</slot>
  <slot name="_score_SeverityScale" type="string"></slot>
  <slot name="polarity" type="string">POSITIVE</slot>
  <slot name="DocType" type="string"></slot>
  <slot name="PatientID" type="int">0</slot>
```

```
<slot name="DateObject" type="record"/>
<slot name="enddate" type="date">
<date day="26" month="5" year="2005"/>
</slot>
<slot name="_score_enddate" type="string"></slot>
<slot name="startdate" type="date">
<date day="26" month="5" year="2005"/>
</slot>
<slot name="_score_startdate" type="string"></slot>
<slot name="Patient" type="string">PATIENT</slot>
<slot name="_score_Patient" type="string"></slot>
<slot name="_keyref" type="record"/>
<slot name="_score" type="string"></slot>
<slot name="_type" type="string"></slot>
</record>
<record id="2" template="HealthStatusRecord">
<slot name="ScoreType" type="string">HealthStatusRecord</slot>
<slot name="_score_ScoreType" type="string"></slot>
<slot name="source" type="string">C:\i2b2 eval\Subsets\Test\235.txt</slot>
<slot name="_score_source" type="string"></slot>
<slot name="region" type="region">
<region end="1665" start="1655">Chest Pain</region>
</slot>
<slot name="_score_region" type="string"></slot>
<slot name="rule" type="string">HealthStatusItemPkg/0</slot>
```

<slot name="ConceptName" type="string">CHEST PAIN UNSPECIFIED</slot>  
<slot name="\_score\_ConceptName" type="string"></slot>  
<slot name="SemanticType" type="string">Sign or Symptom</slot>  
<slot name="BodyLocations" type="string">CHEST</slot>  
<slot name="\_score\_BodyLocations" type="string"></slot>  
<slot name="SeverityStrings" type="string"></slot>  
<slot name="UMLS\_CUI" type="string">C1535568</slot>  
<slot name="DaysBeforeDeath" type="int">0</slot>  
<slot name="PAIN" type="string">Y</slot>  
<slot name="MaxPain" type="int">1</slot>  
<slot name="SeverityScale" type="int">1</slot>  
<slot name="\_score\_SeverityScale" type="string"></slot>  
<slot name="polarity" type="string">POSITIVE</slot>  
<slot name="DocType" type="string"></slot>  
<slot name="PatientID" type="int">0</slot>  
<slot name="DateObject" type="record"/>  
<slot name="enddate" type="date">  
<date day="26" month="5" year="2005"/>  
</slot>  
<slot name="\_score\_enddate" type="string"></slot>  
<slot name="startdate" type="date">  
<date day="26" month="5" year="2005"/>  
</slot>  
<slot name="\_score\_startdate" type="string"></slot>  
<slot name="Patient" type="string">PATIENT</slot>

```
<slot name="_score_Patient" type="string"></slot>
<slot name="_keyref" type="record"/>
<slot name="_score" type="string"></slot>
<slot name="_type" type="string"></slot>
</record>
<record id="3" template="HealthStatusRecord">
<slot name="ScoreType" type="string">HealthStatusRecord</slot>
<slot name="_score_ScoreType" type="string"></slot>
<slot name="source" type="string">C:\i2b2 eval\Subsets\Test\235.txt</slot>
<slot name="_score_source" type="string"></slot>
<slot name="region" type="region">
<region end="3675" start="3668">burning</region>
</slot>
<slot name="_score_region" type="string"></slot>
<slot name="rule" type="string">HealthStatusItemPkg/0</slot>
<slot name="ConceptName" type="string">CHEST PAIN UNSPECIFIED</slot>
<slot name="_score_ConceptName" type="string"></slot>
<slot name="SemanticType" type="string">Sign or Symptom</slot>
<slot name="BodyLocations" type="string">CHEST</slot>
<slot name="_score_BodyLocations" type="string"></slot>
<slot name="SeverityStrings" type="string"></slot>
<slot name="UMLS_CUI" type="string">C1535568</slot>
<slot name="DaysBeforeDeath" type="int">0</slot>
<slot name="PAIN" type="string">Y</slot>
<slot name="MaxPain" type="int">1</slot>
```

```
<slot name="SeverityScale" type="int">1</slot>
<slot name="_score_SeverityScale" type="string"></slot>
<slot name="polarity" type="string">POSITIVE</slot>
<slot name="DocType" type="string"></slot>
<slot name="PatientID" type="int">0</slot>
<slot name="DateObject" type="record"/>
<slot name="enddate" type="date">
<date day="26" month="5" year="2005"/>
</slot>
<slot name="_score_enddate" type="string"></slot>
<slot name="startdate" type="date">
<date day="26" month="5" year="2005"/>
</slot>
<slot name="_score_startdate" type="string"></slot>
<slot name="Patient" type="string">PATIENT</slot>
<slot name="_score_Patient" type="string"></slot>
<slot name="_keyref" type="record"/>
<slot name="_score" type="string"></slot>
<slot name="_type" type="string"></slot>
</record>
<record id="4" template="HealthStatusRecord">
<slot name="ScoreType" type="string">HealthStatusRecord</slot>
<slot name="_score_ScoreType" type="string"></slot>
<slot name="source" type="string">C:\i2b2 eval\Subsets\Test\235.txt</slot>
<slot name="_score_source" type="string"></slot>
```

<slot name="region" type="region">  
<region end="2963" start="2956">burning</region>  
</slot>  
<slot name="\_score\_region" type="string"></slot>  
<slot name="rule" type="string">HealthStatusItemPkg/0</slot>  
<slot name="ConceptName" type="string">BURNING PAINS</slot>  
<slot name="\_score\_ConceptName" type="string"></slot>  
<slot name="SemanticType" type="string">Sign or Symptom</slot>  
<slot name="BodyLocations" type="string">CHEST</slot>  
<slot name="\_score\_BodyLocations" type="string"></slot>  
<slot name="SeverityStrings" type="string"></slot>  
<slot name="UMLS\_CUI" type="string">C0234230</slot>  
<slot name="DaysBeforeDeath" type="int">0</slot>  
<slot name="PAIN" type="string">Y</slot>  
<slot name="MaxPain" type="int">1</slot>  
<slot name="SeverityScale" type="int">1</slot>  
<slot name="\_score\_SeverityScale" type="string"></slot>  
<slot name="polarity" type="string">POSITIVE</slot>  
<slot name="DocType" type="string"></slot>  
<slot name="PatientID" type="int">0</slot>  
<slot name="DateObject" type="record"/>  
<slot name="enddate" type="date">  
<date day="26" month="5" year="2005"/>  
</slot>  
<slot name="\_score\_enddate" type="string"></slot>

```
<slot name="startdate" type="date">
<date day="26" month="5" year="2005"/>
</slot>
<slot name="_score_startdate" type="string"></slot>
<slot name="Patient" type="string">PATIENT</slot>
<slot name="_score_Patient" type="string"></slot>
<slot name="_keyref" type="record"/>
<slot name="_score" type="string"></slot>
<slot name="_type" type="string"></slot>
</record>
<record id="5" template="HealthStatusRecord">
<slot name="ScoreType" type="string">HealthStatusRecord</slot>
<slot name="_score_ScoreType" type="string"></slot>
<slot name="source" type="string">C:\i2b2 eval\Subsets\Test\235.txt</slot>
<slot name="_score_source" type="string"></slot>
<slot name="region" type="region">
<region end="2738" start="2734">pain</region>
</slot>
<slot name="_score_region" type="string"></slot>
<slot name="rule" type="string">HealthStatusItemPkg/0</slot>
<slot name="ConceptName" type="string">PAIN</slot>
<slot name="_score_ConceptName" type="string"></slot>
<slot name="SemanticType" type="string">Sign or Symptom</slot>
<slot name="BodyLocations" type="string">CHEST</slot>
<slot name="_score_BodyLocations" type="string"></slot>
```



```
<slot name="SeverityStrings" type="string"></slot>
<slot name="UMLS_CUI" type="string">C0030193</slot>
<slot name="DaysBeforeDeath" type="int">0</slot>
<slot name="PAIN" type="string">Y</slot>
<slot name="MaxPain" type="int">1</slot>
<slot name="SeverityScale" type="int">1</slot>
<slot name="_score_SeverityScale" type="string"></slot>
<slot name="polarity" type="string">POSITIVE</slot>
<slot name="DocType" type="string"></slot>
<slot name="PatientID" type="int">0</slot>
<slot name="DateObject" type="record"/>
<slot name="enddate" type="date">
<date day="17" month="2" year="2005"/>
</slot>
<slot name="_score_enddate" type="string"></slot>
<slot name="startdate" type="date">
<date day="17" month="2" year="2005"/>
</slot>
<slot name="_score_startdate" type="string"></slot>
<slot name="Patient" type="string">PATIENT</slot>
<slot name="_score_Patient" type="string"></slot>
<slot name="_keyref" type="record"/>
<slot name="_score" type="string"></slot>
<slot name="_type" type="string"></slot>
</record>
```

```
<record id="6" template="HealthStatusRecord">
<slot name="ScoreType" type="string">HealthStatusRecord</slot>
<slot name="_score_ScoreType" type="string"></slot>
<slot name="source" type="string">C:\i2b2 eval\Subsets\Test\235.txt</slot>
<slot name="_score_source" type="string"></slot>
<slot name="region" type="region">
<region end="2376" start="2366">chest pain</region>
</slot>
<slot name="_score_region" type="string"></slot>
<slot name="rule" type="string">HealthStatusItemPkg/0</slot>
<slot name="ConceptName" type="string">CHEST PAIN UNSPECIFIED</slot>
<slot name="_score_ConceptName" type="string"></slot>
<slot name="SemanticType" type="string">Sign or Symptom</slot>
<slot name="BodyLocations" type="string">CHEST</slot>
<slot name="_score_BodyLocations" type="string"></slot>
<slot name="SeverityStrings" type="string">BURNING</slot>
<slot name="UMLS_CUI" type="string">C1535568</slot>
<slot name="DaysBeforeDeath" type="int">0</slot>
<slot name="PAIN" type="string">Y</slot>
<slot name="MaxPain" type="int">1</slot>
<slot name="SeverityScale" type="int">1</slot>
<slot name="_score_SeverityScale" type="string"></slot>
<slot name="polarity" type="string">POSITIVE</slot>
<slot name="DocType" type="string"></slot>
<slot name="PatientID" type="int">0</slot>
```

```
<slot name="DateObject" type="record"/>
<slot name="enddate" type="date">
<date day="25" month="5" year="2005"/>
</slot>
<slot name="_score_enddate" type="string"></slot>
<slot name="startdate" type="date">
<date day="25" month="5" year="2005"/>
</slot>
<slot name="_score_startdate" type="string"></slot>
<slot name="Patient" type="string">PATIENT</slot>
<slot name="_score_Patient" type="string"></slot>
<slot name="_keyref" type="record"/>
<slot name="_score" type="string"></slot>
<slot name="_type" type="string"></slot>
</record>
<record id="7" template="HealthStatusRecord">
<slot name="ScoreType" type="string">HealthStatusRecord</slot>
<slot name="_score_ScoreType" type="string"></slot>
<slot name="source" type="string">C:\i2b2 eval\Subsets\Test\235.txt</slot>
<slot name="_score_source" type="string"></slot>
<slot name="region" type="region">
<region end="2376" start="2366">chest pain</region>
</slot>
<slot name="_score_region" type="string"></slot>
<slot name="rule" type="string">HealthStatusItemPkg/0</slot>
```

<slot name="ConceptName" type="string">CHEST PAIN UNSPECIFIED</slot>  
<slot name="\_score\_ConceptName" type="string"></slot>  
<slot name="SemanticType" type="string">Sign or Symptom</slot>  
<slot name="BodyLocations" type="string">CHEST</slot>  
<slot name="\_score\_BodyLocations" type="string"></slot>  
<slot name="SeverityStrings" type="string">BURNING</slot>  
<slot name="UMLS\_CUI" type="string">C1535568</slot>  
<slot name="DaysBeforeDeath" type="int">0</slot>  
<slot name="PAIN" type="string">Y</slot>  
<slot name="MaxPain" type="int">1</slot>  
<slot name="SeverityScale" type="int">1</slot>  
<slot name="\_score\_SeverityScale" type="string"></slot>  
<slot name="polarity" type="string">POSITIVE</slot>  
<slot name="DocType" type="string"></slot>  
<slot name="PatientID" type="int">0</slot>  
<slot name="DateObject" type="record"/>  
<slot name="enddate" type="date">  
<date day="25" month="5" year="2005"/>  
</slot>  
<slot name="\_score\_enddate" type="string"></slot>  
<slot name="startdate" type="date">  
<date day="25" month="5" year="2005"/>  
</slot>  
<slot name="\_score\_startdate" type="string"></slot>  
<slot name="Patient" type="string">PATIENT</slot>

```
<slot name="_score_Patient" type="string"></slot>
<slot name="_keyref" type="record"/>
<slot name="_score" type="string"></slot>
<slot name="_type" type="string"></slot>
</record>
<record id="8" template="HealthStatusRecord">
<slot name="ScoreType" type="string">HealthStatusRecord</slot>
<slot name="_score_ScoreType" type="string">CORRECT</slot>
<slot name="source" type="string">C:\i2b2 eval\Subsets\Test\235.txt</slot>
<slot name="_score_source" type="string">CORRECT</slot>
<slot name="region" type="region">
<region end="2376" start="2358">burning chest pain</region>
</slot>
<slot name="_score_region" type="string">PARTIAL</slot>
<slot name="rule" type="string">HealthStatusItemPkg/0</slot>
<slot name="ConceptName" type="string">BURNING CHEST PAIN</slot>
<slot name="_score_ConceptName" type="string">INCORRECT</slot>
<slot name="SemanticType" type="string">Sign or Symptom</slot>
<slot name="BodyLocations" type="string"></slot>
<slot name="_score_BodyLocations" type="string">MISSING</slot>
<slot name="SeverityStrings" type="string"></slot>
<slot name="UMLS_CUI" type="string">NO CUI</slot>
<slot name="DaysBeforeDeath" type="int">0</slot>
<slot name="PAIN" type="string">Y</slot>
<slot name="MaxPain" type="int">1</slot>
```

```
<slot name="SeverityScale" type="int">1</slot>
<slot name="_score_SeverityScale" type="string">CORRECT</slot>
<slot name="polarity" type="string">POSITIVE</slot>
<slot name="DocType" type="string"></slot>
<slot name="PatientID" type="int">0</slot>
<slot name="DateObject" type="record"/>
<slot name="enddate" type="date">
<date day="26" month="5" year="2005"/>
</slot>
<slot name="_score_enddate" type="string">INCORRECT</slot>
<slot name="startdate" type="date">
<date day="26" month="5" year="2005"/>
</slot>
<slot name="_score_startdate" type="string">INCORRECT</slot>
<slot name="Patient" type="string">PATIENT</slot>
<slot name="_score_Patient" type="string">CORRECT</slot>
<slot name="_keyref" type="record">
<record ref="7"/>
</slot>
<slot name="_score" type="string">INCORRECT</slot>
<slot name="_type" type="string"></slot>
</record>
<record id="9" template="HealthStatusRecord">
<slot name="ScoreType" type="string">HealthStatusRecord</slot>
<slot name="_score_ScoreType" type="string"></slot>
```

<slot name="source" type="string">C:\i2b2 eval\Subsets\Test\235.txt</slot>  
<slot name="\_score\_source" type="string"></slot>  
<slot name="region" type="region">  
<region end="1665" start="1655">Chest Pain</region>  
</slot>  
<slot name="\_score\_region" type="string"></slot>  
<slot name="rule" type="string">HealthStatusItemPkg/0</slot>  
<slot name="ConceptName" type="string">CHEST PAIN UNSPECIFIED</slot>  
<slot name="\_score\_ConceptName" type="string"></slot>  
<slot name="SemanticType" type="string">Sign or Symptom</slot>  
<slot name="BodyLocations" type="string">CHEST</slot>  
<slot name="\_score\_BodyLocations" type="string"></slot>  
<slot name="SeverityStrings" type="string"></slot>  
<slot name="UMLS\_CUI" type="string">C1535568</slot>  
<slot name="DaysBeforeDeath" type="int">0</slot>  
<slot name="PAIN" type="string">Y</slot>  
<slot name="MaxPain" type="int">1</slot>  
<slot name="SeverityScale" type="int">1</slot>  
<slot name="\_score\_SeverityScale" type="string"></slot>  
<slot name="polarity" type="string">POSITIVE</slot>  
<slot name="DocType" type="string"></slot>  
<slot name="PatientID" type="int">0</slot>  
<slot name="DateObject" type="record"/>  
<slot name="enddate" type="date">  
<date day="26" month="5" year="2005"/>

```
</slot>
<slot name="_score_enddate" type="string"></slot>
<slot name="startdate" type="date">
<date day="26" month="5" year="2005"/>
</slot>
<slot name="_score_startdate" type="string"></slot>
<slot name="Patient" type="string">PATIENT</slot>
<slot name="_score_Patient" type="string"></slot>
<slot name="_keyref" type="record"/>
<slot name="_score" type="string"></slot>
<slot name="_type" type="string"></slot>
</record>
<record id="10" template="HealthStatusRecord">
<slot name="ScoreType" type="string">HealthStatusRecord</slot>
<slot name="_score_ScoreType" type="string">CORRECT</slot>
<slot name="source" type="string">C:\i2b2 eval\Subsets\Test\235.txt</slot>
<slot name="_score_source" type="string">CORRECT</slot>
<slot name="region" type="region">
<region end="1665" start="1655">Chest Pain</region>
</slot>
<slot name="_score_region" type="string">CORRECT</slot>
<slot name="rule" type="string">HealthStatusItemPkg/0</slot>
<slot name="ConceptName" type="string">CHEST PAIN</slot>
<slot name="_score_ConceptName" type="string">INCORRECT</slot>
<slot name="SemanticType" type="string">Sign or Symptom</slot>
```



<slot name="BodyLocations" type="string">CHEST</slot>  
<slot name="\_score\_BodyLocations" type="string">CORRECT</slot>  
<slot name="SeverityStrings" type="string"></slot>  
<slot name="UMLS\_CUI" type="string">C0008031</slot>  
<slot name="DaysBeforeDeath" type="int">0</slot>  
<slot name="PAIN" type="string">Y</slot>  
<slot name="MaxPain" type="int">1</slot>  
<slot name="SeverityScale" type="int">1</slot>  
<slot name="\_score\_SeverityScale" type="string">CORRECT</slot>  
<slot name="polarity" type="string">POSITIVE</slot>  
<slot name="DocType" type="string"></slot>  
<slot name="PatientID" type="int">0</slot>  
<slot name="DateObject" type="record"/>  
<slot name="enddate" type="date">  
<date day="26" month="5" year="2005"/>  
</slot>  
<slot name="\_score\_enddate" type="string">CORRECT</slot>  
<slot name="startdate" type="date">  
<date day="26" month="5" year="2005"/>  
</slot>  
<slot name="\_score\_startdate" type="string">CORRECT</slot>  
<slot name="Patient" type="string">PATIENT</slot>  
<slot name="\_score\_Patient" type="string">CORRECT</slot>  
<slot name="\_keyref" type="record">  
<record ref="9"/>

```
</slot>
<slot name="_score" type="string">INCORRECT</slot>
<slot name="_type" type="string"></slot>
</record>
<record id="11" template="HealthStatusRecord">
<slot name="ScoreType" type="string">HealthStatusRecord</slot>
<slot name="_score_ScoreType" type="string"></slot>
<slot name="source" type="string">C:\i2b2 eval\Subsets\Test\235.txt</slot>
<slot name="_score_source" type="string"></slot>
<slot name="region" type="region">
<region end="2738" start="2734">pain</region>
</slot>
<slot name="_score_region" type="string"></slot>
<slot name="rule" type="string">HealthStatusItemPkg/0</slot>
<slot name="ConceptName" type="string">PAIN</slot>
<slot name="_score_ConceptName" type="string"></slot>
<slot name="SemanticType" type="string">Sign or Symptom</slot>
<slot name="BodyLocations" type="string">CHEST</slot>
<slot name="_score_BodyLocations" type="string"></slot>
<slot name="SeverityStrings" type="string"></slot>
<slot name="UMLS_CUI" type="string">C0030193</slot>
<slot name="DaysBeforeDeath" type="int">0</slot>
<slot name="PAIN" type="string">Y</slot>
<slot name="MaxPain" type="int">1</slot>
<slot name="SeverityScale" type="int">1</slot>
```

```
<slot name="_score_SeverityScale" type="string"></slot>
<slot name="polarity" type="string">POSITIVE</slot>
<slot name="DocType" type="string"></slot>
<slot name="PatientID" type="int">0</slot>
<slot name="DateObject" type="record"/>
<slot name="enddate" type="date">
<date day="17" month="2" year="2005"/>
</slot>
<slot name="_score_enddate" type="string"></slot>
<slot name="startdate" type="date">
<date day="17" month="2" year="2005"/>
</slot>
<slot name="_score_startdate" type="string"></slot>
<slot name="Patient" type="string">PATIENT</slot>
<slot name="_score_Patient" type="string"></slot>
<slot name="_keyref" type="record"/>
<slot name="_score" type="string"></slot>
<slot name="_type" type="string"></slot>
</record>
<record id="12" template="HealthStatusRecord">
<slot name="ScoreType" type="string">HealthStatusRecord</slot>
<slot name="_score_ScoreType" type="string">CORRECT</slot>
<slot name="source" type="string">C:\i2b2 eval\Subsets\Test\235.txt</slot>
<slot name="_score_source" type="string">CORRECT</slot>
<slot name="region" type="region">
```

<region end="2738" start="2734">pain</region>  
</slot>  
<slot name="\_score\_region" type="string">CORRECT</slot>  
<slot name="rule" type="string">HealthStatusItemPkg/0</slot>  
<slot name="ConceptName" type="string">PAIN</slot>  
<slot name="\_score\_ConceptName" type="string">CORRECT</slot>  
<slot name="SemanticType" type="string">Sign or Symptom</slot>  
<slot name="BodyLocations" type="string"></slot>  
<slot name="\_score\_BodyLocations" type="string">MISSING</slot>  
<slot name="SeverityStrings" type="string"></slot>  
<slot name="UMLS\_CUI" type="string">C0030193</slot>  
<slot name="DaysBeforeDeath" type="int">0</slot>  
<slot name="PAIN" type="string">Y</slot>  
<slot name="MaxPain" type="int">1</slot>  
<slot name="SeverityScale" type="int">1</slot>  
<slot name="\_score\_SeverityScale" type="string">CORRECT</slot>  
<slot name="polarity" type="string">POSITIVE</slot>  
<slot name="DocType" type="string"></slot>  
<slot name="PatientID" type="int">0</slot>  
<slot name="DateObject" type="record"/>  
<slot name="enddate" type="date">  
<date day="26" month="5" year="2005"/>  
</slot>  
<slot name="\_score\_enddate" type="string">INCORRECT</slot>  
<slot name="startdate" type="date">

```
<date day="26" month="5" year="2005"/>
</slot>
<slot name="_score_startdate" type="string">INCORRECT</slot>
<slot name="Patient" type="string">PATIENT</slot>
<slot name="_score_Patient" type="string">CORRECT</slot>
<slot name="_keyref" type="record">
<record ref="11"/>
</slot>
<slot name="_score" type="string">INCORRECT</slot>
<slot name="_type" type="string"></slot>
</record>
<record id="13" template="HealthStatusRecord">
<slot name="ScoreType" type="string">HealthStatusRecord</slot>
<slot name="_score_ScoreType" type="string"></slot>
<slot name="source" type="string">C:\i2b2 eval\Subsets\Test\235.txt</slot>
<slot name="_score_source" type="string"></slot>
<slot name="region" type="region">
<region end="3353" start="3343">tenderness</region>
</slot>
<slot name="_score_region" type="string"></slot>
<slot name="rule" type="string">HealthStatusItemPkg/0</slot>
<slot name="ConceptName" type="string">CHEST PAIN UNSPECIFIED</slot>
<slot name="_score_ConceptName" type="string"></slot>
<slot name="SemanticType" type="string">Sign or Symptom</slot>
<slot name="BodyLocations" type="string">CHEST</slot>
```

<slot name="\_score\_BodyLocations" type="string"></slot>  
<slot name="SeverityStrings" type="string">NO</slot>  
<slot name="UMLS\_CUI" type="string">C1535568</slot>  
<slot name="DaysBeforeDeath" type="int">0</slot>  
<slot name="PAIN" type="string">Y</slot>  
<slot name="MaxPain" type="int">1</slot>  
<slot name="SeverityScale" type="int">0</slot>  
<slot name="\_score\_SeverityScale" type="string"></slot>  
<slot name="polarity" type="string">POSITIVE</slot>  
<slot name="DocType" type="string"></slot>  
<slot name="PatientID" type="int">0</slot>  
<slot name="DateObject" type="record"/>  
<slot name="enddate" type="date">  
<date day="26" month="5" year="2005"/>  
</slot>  
<slot name="\_score\_enddate" type="string"></slot>  
<slot name="startdate" type="date">  
<date day="26" month="5" year="2005"/>  
</slot>  
<slot name="\_score\_startdate" type="string"></slot>  
<slot name="Patient" type="string">PATIENT</slot>  
<slot name="\_score\_Patient" type="string"></slot>  
<slot name="\_keyref" type="record"/>  
<slot name="\_score" type="string"></slot>  
<slot name="\_type" type="string"></slot>

```
</record>
<record id="14" template="HealthStatusRecord">
  <slot name="ScoreType" type="string">HealthStatusRecord</slot>
  <slot name="_score_ScoreType" type="string"></slot>
  <slot name="source" type="string">C:\i2b2 eval\Subsets\Test\235.txt</slot>
  <slot name="_score_source" type="string"></slot>
  <slot name="region" type="region">
    <region end="2498" start="2491">burning</region>
  </slot>
  <slot name="_score_region" type="string"></slot>
  <slot name="rule" type="string">HealthStatusItemPkg/0</slot>
  <slot name="ConceptName" type="string">BURNING PAINS</slot>
  <slot name="_score_ConceptName" type="string"></slot>
  <slot name="SemanticType" type="string">Sign or Symptom</slot>
  <slot name="BodyLocations" type="string">CHEST</slot>
  <slot name="_score_BodyLocations" type="string"></slot>
  <slot name="SeverityStrings" type="string"></slot>
  <slot name="UMLS_CUI" type="string">C0234230</slot>
  <slot name="DaysBeforeDeath" type="int">0</slot>
  <slot name="PAIN" type="string">Y</slot>
  <slot name="MaxPain" type="int">1</slot>
  <slot name="SeverityScale" type="int">1</slot>
  <slot name="_score_SeverityScale" type="string"></slot>
  <slot name="polarity" type="string">POSITIVE</slot>
  <slot name="DocType" type="string"></slot>
```

```
<slot name="PatientID" type="int">0</slot>
<slot name="DateObject" type="record"/>
<slot name="enddate" type="date">
<date day="26" month="5" year="2005"/>
</slot>
<slot name="_score_enddate" type="string"></slot>
<slot name="startdate" type="date">
<date day="26" month="5" year="2005"/>
</slot>
<slot name="_score_startdate" type="string"></slot>
<slot name="Patient" type="string">PATIENT</slot>
<slot name="_score_Patient" type="string"></slot>
<slot name="_keyref" type="record"/>
<slot name="_score" type="string"></slot>
<slot name="_type" type="string"></slot>
</record>
<record id="15" template="HealthStatusRecord">
<slot name="ScoreType" type="string">HealthStatusRecord</slot>
<slot name="_score_ScoreType" type="string">CORRECT</slot>
<slot name="source" type="string">C:\i2b2 eval\Subsets\Test\235.txt</slot>
<slot name="_score_source" type="string">CORRECT</slot>
<slot name="region" type="region">
<region end="2498" start="2491">burning</region>
</slot>
<slot name="_score_region" type="string">CORRECT</slot>
```



<slot name="rule" type="string">HealthStatusItemPkg/0</slot>  
<slot name="ConceptName" type="string">BURNING PAINS</slot>  
<slot name="\_score\_ConceptName" type="string">CORRECT</slot>  
<slot name="SemanticType" type="string">Sign or Symptom</slot>  
<slot name="BodyLocations" type="string"></slot>  
<slot name="\_score\_BodyLocations" type="string">MISSING</slot>  
<slot name="SeverityStrings" type="string"></slot>  
<slot name="UMLS\_CUI" type="string">C0234230</slot>  
<slot name="DaysBeforeDeath" type="int">0</slot>  
<slot name="PAIN" type="string">Y</slot>  
<slot name="MaxPain" type="int">1</slot>  
<slot name="SeverityScale" type="int">1</slot>  
<slot name="\_score\_SeverityScale" type="string">CORRECT</slot>  
<slot name="polarity" type="string">POSITIVE</slot>  
<slot name="DocType" type="string"></slot>  
<slot name="PatientID" type="int">0</slot>  
<slot name="DateObject" type="record"/>  
<slot name="enddate" type="date">  
<date day="26" month="5" year="2005"/>  
</slot>  
<slot name="\_score\_enddate" type="string">CORRECT</slot>  
<slot name="startdate" type="date">  
<date day="26" month="5" year="2005"/>  
</slot>  
<slot name="\_score\_startdate" type="string">CORRECT</slot>

```
<slot name="Patient" type="string">PATIENT</slot>
<slot name="_score_Patient" type="string">CORRECT</slot>
<slot name="_keyref" type="record">
<record ref="14"/>
</slot>
<slot name="_score" type="string">INCORRECT</slot>
<slot name="_type" type="string"></slot>
</record>
<record id="16" template="HealthStatusRecord">
<slot name="ScoreType" type="string">HealthStatusRecord</slot>
<slot name="_score_ScoreType" type="string">SPURIOUS</slot>
<slot name="source" type="string">C:\i2b2 eval\Subsets\Test\235.txt</slot>
<slot name="_score_source" type="string">SPURIOUS</slot>
<slot name="region" type="region">
<region end="2790" start="2786">pain</region>
</slot>
<slot name="_score_region" type="string">SPURIOUS</slot>
<slot name="rule" type="string">HealthStatusItemPkg/0</slot>
<slot name="ConceptName" type="string">PAIN</slot>
<slot name="_score_ConceptName" type="string">SPURIOUS</slot>
<slot name="SemanticType" type="string">Sign or Symptom</slot>
<slot name="BodyLocations" type="string"></slot>
<slot name="_score_BodyLocations" type="string"></slot>
<slot name="SeverityStrings" type="string"></slot>
<slot name="UMLS_CUI" type="string">C0030193</slot>
```

```
<slot name="DaysBeforeDeath" type="int">0</slot>
<slot name="PAIN" type="string">Y</slot>
<slot name="MaxPain" type="int">1</slot>
<slot name="SeverityScale" type="int">1</slot>
<slot name="_score_SeverityScale" type="string">SPURIOUS</slot>
<slot name="polarity" type="string">POSITIVE</slot>
<slot name="DocType" type="string"></slot>
<slot name="PatientID" type="int">0</slot>
<slot name="DateObject" type="record"/>
<slot name="enddate" type="date">
<date day="26" month="5" year="2005"/>
</slot>
<slot name="_score_enddate" type="string">SPURIOUS</slot>
<slot name="startdate" type="date">
<date day="26" month="5" year="2005"/>
</slot>
<slot name="_score_startdate" type="string">SPURIOUS</slot>
<slot name="Patient" type="string">PATIENT</slot>
<slot name="_score_Patient" type="string">SPURIOUS</slot>
<slot name="_keyref" type="record"/>
<slot name="_score" type="string">SPURIOUS</slot>
<slot name="_type" type="string"></slot>
</record>
<record id="17" template="HealthStatusRecord">
<slot name="ScoreType" type="string">HealthStatusRecord</slot>
```

<slot name="\_score\_ScoreType" type="string"></slot>  
<slot name="source" type="string">C:\i2b2 eval\Subsets\Test\235.txt</slot>  
<slot name="\_score\_source" type="string"></slot>  
<slot name="region" type="region">  
<region end="2846" start="2842">pain</region>  
</slot>  
<slot name="\_score\_region" type="string"></slot>  
<slot name="rule" type="string">HealthStatusItemPkg/0</slot>  
<slot name="ConceptName" type="string">PAIN</slot>  
<slot name="\_score\_ConceptName" type="string"></slot>  
<slot name="SemanticType" type="string">Sign or Symptom</slot>  
<slot name="BodyLocations" type="string">CHEST</slot>  
<slot name="\_score\_BodyLocations" type="string"></slot>  
<slot name="SeverityStrings" type="string"></slot>  
<slot name="UMLS\_CUI" type="string">C0030193</slot>  
<slot name="DaysBeforeDeath" type="int">0</slot>  
<slot name="PAIN" type="string">Y</slot>  
<slot name="MaxPain" type="int">1</slot>  
<slot name="SeverityScale" type="int">1</slot>  
<slot name="\_score\_SeverityScale" type="string"></slot>  
<slot name="polarity" type="string">POSITIVE</slot>  
<slot name="DocType" type="string"></slot>  
<slot name="PatientID" type="int">0</slot>  
<slot name="DateObject" type="record"/>  
<slot name="enddate" type="date">

```
<date day="26" month="5" year="2005"/>
</slot>
<slot name="_score_enddate" type="string"></slot>
<slot name="startdate" type="date">
<date day="26" month="5" year="2005"/>
</slot>
<slot name="_score_startdate" type="string"></slot>
<slot name="Patient" type="string">PATIENT</slot>
<slot name="_score_Patient" type="string"></slot>
<slot name="_keyref" type="record"/>
<slot name="_score" type="string"></slot>
<slot name="_type" type="string"></slot>
</record>
<record id="18" template="HealthStatusRecord">
<slot name="ScoreType" type="string">HealthStatusRecord</slot>
<slot name="_score_ScoreType" type="string">CORRECT</slot>
<slot name="source" type="string">C:\i2b2 eval\Subsets\Test\235.txt</slot>
<slot name="_score_source" type="string">CORRECT</slot>
<slot name="region" type="region">
<region end="2846" start="2842">pain</region>
</slot>
<slot name="_score_region" type="string">CORRECT</slot>
<slot name="rule" type="string">HealthStatusItemPkg/0</slot>
<slot name="ConceptName" type="string">PAIN</slot>
<slot name="_score_ConceptName" type="string">CORRECT</slot>
```

<slot name="SemanticType" type="string">Sign or Symptom</slot>  
<slot name="BodyLocations" type="string"></slot>  
<slot name="\_score\_BodyLocations" type="string">MISSING</slot>  
<slot name="SeverityStrings" type="string"></slot>  
<slot name="UMLS\_CUI" type="string">C0030193</slot>  
<slot name="DaysBeforeDeath" type="int">0</slot>  
<slot name="PAIN" type="string">Y</slot>  
<slot name="MaxPain" type="int">1</slot>  
<slot name="SeverityScale" type="int">1</slot>  
<slot name="\_score\_SeverityScale" type="string">CORRECT</slot>  
<slot name="polarity" type="string">POSITIVE</slot>  
<slot name="DocType" type="string"></slot>  
<slot name="PatientID" type="int">0</slot>  
<slot name="DateObject" type="record"/>  
<slot name="enddate" type="date">  
<date day="26" month="5" year="2005"/>  
</slot>  
<slot name="\_score\_enddate" type="string">CORRECT</slot>  
<slot name="startdate" type="date">  
<date day="26" month="5" year="2005"/>  
</slot>  
<slot name="\_score\_startdate" type="string">CORRECT</slot>  
<slot name="Patient" type="string">PATIENT</slot>  
<slot name="\_score\_Patient" type="string">CORRECT</slot>  
<slot name="\_keyref" type="record">

```
<record ref="17"/>
</slot>
<slot name="_score" type="string">INCORRECT</slot>
<slot name="_type" type="string"></slot>
</record>
<record id="19" template="HealthStatusRecord">
<slot name="ScoreType" type="string">HealthStatusRecord</slot>
<slot name="_score_ScoreType" type="string"></slot>
<slot name="source" type="string">C:\i2b2 eval\Subsets\Test\235.txt</slot>
<slot name="_score_source" type="string"></slot>
<slot name="region" type="region">
<region end="2691" start="2687">pain</region>
</slot>
<slot name="_score_region" type="string"></slot>
<slot name="rule" type="string">HealthStatusItemPkg/0</slot>
<slot name="ConceptName" type="string">PAIN</slot>
<slot name="_score_ConceptName" type="string"></slot>
<slot name="SemanticType" type="string">Sign or Symptom</slot>
<slot name="BodyLocations" type="string">CHEST</slot>
<slot name="_score_BodyLocations" type="string"></slot>
<slot name="SeverityStrings" type="string"></slot>
<slot name="UMLS_CUI" type="string">C0030193</slot>
<slot name="DaysBeforeDeath" type="int">0</slot>
<slot name="PAIN" type="string">Y</slot>
<slot name="MaxPain" type="int">1</slot>
```

```
<slot name="SeverityScale" type="int">1</slot>
<slot name="_score_SeverityScale" type="string"></slot>
<slot name="polarity" type="string">POSITIVE</slot>
<slot name="DocType" type="string"></slot>
<slot name="PatientID" type="int">0</slot>
<slot name="DateObject" type="record"/>
<slot name="enddate" type="date">
<date day="26" month="5" year="2005"/>
</slot>
<slot name="_score_enddate" type="string"></slot>
<slot name="startdate" type="date">
<date day="26" month="5" year="2005"/>
</slot>
<slot name="_score_startdate" type="string"></slot>
<slot name="Patient" type="string">PATIENT</slot>
<slot name="_score_Patient" type="string"></slot>
<slot name="_keyref" type="record"/>
<slot name="_score" type="string"></slot>
<slot name="_type" type="string"></slot>
</record>
<record id="20" template="HealthStatusRecord">
<slot name="ScoreType" type="string">HealthStatusRecord</slot>
<slot name="_score_ScoreType" type="string"></slot>
<slot name="source" type="string">C:\i2b2 eval\Subsets\Test\235.txt</slot>
<slot name="_score_source" type="string"></slot>
```



<slot name="region" type="region">  
<region end="2953" start="2951">CP</region>  
</slot>  
<slot name="\_score\_region" type="string"></slot>  
<slot name="rule" type="string">HealthStatusItemPkg/0</slot>  
<slot name="ConceptName" type="string">CHEST PAIN UNSPECIFIED</slot>  
<slot name="\_score\_ConceptName" type="string"></slot>  
<slot name="SemanticType" type="string">Sign or Symptom</slot>  
<slot name="BodyLocations" type="string">CHEST</slot>  
<slot name="\_score\_BodyLocations" type="string"></slot>  
<slot name="SeverityStrings" type="string"></slot>  
<slot name="UMLS\_CUI" type="string">C1535568</slot>  
<slot name="DaysBeforeDeath" type="int">0</slot>  
<slot name="PAIN" type="string">Y</slot>  
<slot name="MaxPain" type="int">1</slot>  
<slot name="SeverityScale" type="int">1</slot>  
<slot name="\_score\_SeverityScale" type="string"></slot>  
<slot name="polarity" type="string">POSITIVE</slot>  
<slot name="DocType" type="string"></slot>  
<slot name="PatientID" type="int">0</slot>  
<slot name="DateObject" type="record"/>  
<slot name="enddate" type="date">  
<date day="26" month="5" year="2005"/>  
</slot>  
<slot name="\_score\_enddate" type="string"></slot>

```
<slot name="startdate" type="date">
<date day="26" month="5" year="2005"/>
</slot>
<slot name="_score_startdate" type="string"></slot>
<slot name="Patient" type="string">PATIENT</slot>
<slot name="_score_Patient" type="string"></slot>
<slot name="_keyref" type="record"/>
<slot name="_score" type="string"></slot>
<slot name="_type" type="string"></slot>
</record>
<record id="21" template="HealthStatusRecord">
<slot name="ScoreType" type="string">HealthStatusRecord</slot>
<slot name="_score_ScoreType" type="string">CORRECT</slot>
<slot name="source" type="string">C:\i2b2 eval\Subsets\Test\235.txt</slot>
<slot name="_score_source" type="string">CORRECT</slot>
<slot name="region" type="region">
<region end="2953" start="2951">CP</region>
</slot>
<slot name="_score_region" type="string">CORRECT</slot>
<slot name="rule" type="string">HealthStatusItemPkg/0</slot>
<slot name="ConceptName" type="string">CHEST PAIN</slot>
<slot name="_score_ConceptName" type="string">INCORRECT</slot>
<slot name="SemanticType" type="string">Sign or Symptom</slot>
<slot name="BodyLocations" type="string">CHEST</slot>
<slot name="_score_BodyLocations" type="string">CORRECT</slot>
```

<slot name="SeverityStrings" type="string"></slot>  
<slot name="UMLS\_CUI" type="string">C0008031</slot>  
<slot name="DaysBeforeDeath" type="int">0</slot>  
<slot name="PAIN" type="string">Y</slot>  
<slot name="MaxPain" type="int">1</slot>  
<slot name="SeverityScale" type="int">1</slot>  
<slot name="\_score\_SeverityScale" type="string">CORRECT</slot>  
<slot name="polarity" type="string">POSITIVE</slot>  
<slot name="DocType" type="string"></slot>  
<slot name="PatientID" type="int">0</slot>  
<slot name="DateObject" type="record"/>  
<slot name="enddate" type="date">  
<date day="26" month="5" year="2005"/>  
</slot>  
<slot name="\_score\_enddate" type="string">CORRECT</slot>  
<slot name="startdate" type="date">  
<date day="26" month="5" year="2005"/>  
</slot>  
<slot name="\_score\_startdate" type="string">CORRECT</slot>  
<slot name="Patient" type="string">PATIENT</slot>  
<slot name="\_score\_Patient" type="string">CORRECT</slot>  
<slot name="\_keyref" type="record">  
<record ref="20"/>  
</slot>  
<slot name="\_score" type="string">INCORRECT</slot>

```
<slot name="_type" type="string"></slot>
</record>
<record id="22" template="HealthStatusRecord">
<slot name="ScoreType" type="string">HealthStatusRecord</slot>
<slot name="_score_ScoreType" type="string"></slot>
<slot name="source" type="string">C:\i2b2 eval\Subsets\Test\235.txt</slot>
<slot name="_score_source" type="string"></slot>
<slot name="region" type="region">
<region end="2963" start="2956">burning</region>
</slot>
<slot name="_score_region" type="string"></slot>
<slot name="rule" type="string">HealthStatusItemPkg/0</slot>
<slot name="ConceptName" type="string">BURNING PAINS</slot>
<slot name="_score_ConceptName" type="string"></slot>
<slot name="SemanticType" type="string">Sign or Symptom</slot>
<slot name="BodyLocations" type="string">CHEST</slot>
<slot name="_score_BodyLocations" type="string"></slot>
<slot name="SeverityStrings" type="string"></slot>
<slot name="UMLS_CUI" type="string">C0234230</slot>
<slot name="DaysBeforeDeath" type="int">0</slot>
<slot name="PAIN" type="string">Y</slot>
<slot name="MaxPain" type="int">1</slot>
<slot name="SeverityScale" type="int">1</slot>
<slot name="_score_SeverityScale" type="string"></slot>
<slot name="polarity" type="string">POSITIVE</slot>
```

```
<slot name="DocType" type="string"></slot>
<slot name="PatientID" type="int">0</slot>
<slot name="DateObject" type="record"/>
<slot name="enddate" type="date">
<date day="26" month="5" year="2005"/>
</slot>
<slot name="_score_enddate" type="string"></slot>
<slot name="startdate" type="date">
<date day="26" month="5" year="2005"/>
</slot>
<slot name="_score_startdate" type="string"></slot>
<slot name="Patient" type="string">PATIENT</slot>
<slot name="_score_Patient" type="string"></slot>
<slot name="_keyref" type="record"/>
<slot name="_score" type="string"></slot>
<slot name="_type" type="string"></slot>
</record>
<record id="23" template="HealthStatusRecord">
<slot name="ScoreType" type="string">HealthStatusRecord</slot>
<slot name="_score_ScoreType" type="string">CORRECT</slot>
<slot name="source" type="string">C:\i2b2 eval\Subsets\Test\235.txt</slot>
<slot name="_score_source" type="string">CORRECT</slot>
<slot name="region" type="region">
<region end="2963" start="2956">burning</region>
</slot>
```

<slot name="\_score\_region" type="string">CORRECT</slot>  
<slot name="rule" type="string">HealthStatusItemPkg/0</slot>  
<slot name="ConceptName" type="string">BURNING PAINS</slot>  
<slot name="\_score\_ConceptName" type="string">CORRECT</slot>  
<slot name="SemanticType" type="string">Sign or Symptom</slot>  
<slot name="BodyLocations" type="string"></slot>  
<slot name="\_score\_BodyLocations" type="string">MISSING</slot>  
<slot name="SeverityStrings" type="string"></slot>  
<slot name="UMLS\_CUI" type="string">C0234230</slot>  
<slot name="DaysBeforeDeath" type="int">0</slot>  
<slot name="PAIN" type="string">Y</slot>  
<slot name="MaxPain" type="int">1</slot>  
<slot name="SeverityScale" type="int">1</slot>  
<slot name="\_score\_SeverityScale" type="string">CORRECT</slot>  
<slot name="polarity" type="string">POSITIVE</slot>  
<slot name="DocType" type="string"></slot>  
<slot name="PatientID" type="int">0</slot>  
<slot name="DateObject" type="record"/>  
<slot name="enddate" type="date">  
<date day="26" month="5" year="2005"/>  
</slot>  
<slot name="\_score\_enddate" type="string">CORRECT</slot>  
<slot name="startdate" type="date">  
<date day="26" month="5" year="2005"/>  
</slot>

```
<slot name="_score_startdate" type="string">CORRECT</slot>
<slot name="Patient" type="string">PATIENT</slot>
<slot name="_score_Patient" type="string">CORRECT</slot>
<slot name="_keyref" type="record">
<record ref="22"/>
</slot>
<slot name="_score" type="string">INCORRECT</slot>
<slot name="_type" type="string"></slot>
</record>
<record id="24" template="HealthStatusRecord">
<slot name="ScoreType" type="string">HealthStatusRecord</slot>
<slot name="_score_ScoreType" type="string">SPURIOUS</slot>
<slot name="source" type="string">C:\i2b2 eval\Subsets\Test\235.txt</slot>
<slot name="_score_source" type="string">SPURIOUS</slot>
<slot name="region" type="region">
<region end="3236" start="3234">CP</region>
</slot>
<slot name="_score_region" type="string">SPURIOUS</slot>
<slot name="rule" type="string">HealthStatusItemPkg/0</slot>
<slot name="ConceptName" type="string">CHEST PAIN</slot>
<slot name="_score_ConceptName" type="string">SPURIOUS</slot>
<slot name="SemanticType" type="string">Sign or Symptom</slot>
<slot name="BodyLocations" type="string">CHEST</slot>
<slot name="_score_BodyLocations" type="string">SPURIOUS</slot>
<slot name="SeverityStrings" type="string">WITHOUT</slot>
```

```
<slot name="UMLS_CUI" type="string">C0008031</slot>
<slot name="DaysBeforeDeath" type="int">0</slot>
<slot name="PAIN" type="string">Y</slot>
<slot name="MaxPain" type="int">1</slot>
<slot name="SeverityScale" type="int">0</slot>
<slot name="_score_SeverityScale" type="string">SPURIOUS</slot>
<slot name="polarity" type="string">POSITIVE</slot>
<slot name="DocType" type="string"></slot>
<slot name="PatientID" type="int">0</slot>
<slot name="DateObject" type="record"/>
<slot name="enddate" type="date">
<date day="26" month="5" year="2005"/>
</slot>
<slot name="_score_enddate" type="string">SPURIOUS</slot>
<slot name="startdate" type="date">
<date day="26" month="5" year="2005"/>
</slot>
<slot name="_score_startdate" type="string">SPURIOUS</slot>
<slot name="Patient" type="string">PATIENT</slot>
<slot name="_score_Patient" type="string">SPURIOUS</slot>
<slot name="_keyref" type="record"/>
<slot name="_score" type="string">SPURIOUS</slot>
<slot name="_type" type="string"></slot>
</record>
<record id="25" template="HealthStatusRecord">
```



<slot name="ScoreType" type="string">HealthStatusRecord</slot>  
<slot name="\_score\_ScoreType" type="string"></slot>  
<slot name="source" type="string">C:\i2b2 eval\Subsets\Test\235.txt</slot>  
<slot name="\_score\_source" type="string"></slot>  
<slot name="region" type="region">  
<region end="3353" start="3343">tenderness</region>  
</slot>  
<slot name="\_score\_region" type="string"></slot>  
<slot name="rule" type="string">HealthStatusItemPkg/0</slot>  
<slot name="ConceptName" type="string">CHEST PAIN UNSPECIFIED</slot>  
<slot name="\_score\_ConceptName" type="string"></slot>  
<slot name="SemanticType" type="string">Sign or Symptom</slot>  
<slot name="BodyLocations" type="string">CHEST</slot>  
<slot name="\_score\_BodyLocations" type="string"></slot>  
<slot name="SeverityStrings" type="string">NO</slot>  
<slot name="UMLS\_CUI" type="string">C1535568</slot>  
<slot name="DaysBeforeDeath" type="int">0</slot>  
<slot name="PAIN" type="string">Y</slot>  
<slot name="MaxPain" type="int">1</slot>  
<slot name="SeverityScale" type="int">0</slot>  
<slot name="\_score\_SeverityScale" type="string"></slot>  
<slot name="polarity" type="string">POSITIVE</slot>  
<slot name="DocType" type="string"></slot>  
<slot name="PatientID" type="int">0</slot>  
<slot name="DateObject" type="record"/>

```
<slot name="enddate" type="date">
<date day="26" month="5" year="2005"/>
</slot>
<slot name="_score_enddate" type="string"></slot>
<slot name="startdate" type="date">
<date day="26" month="5" year="2005"/>
</slot>
<slot name="_score_startdate" type="string"></slot>
<slot name="Patient" type="string">PATIENT</slot>
<slot name="_score_Patient" type="string"></slot>
<slot name="_keyref" type="record"/>
<slot name="_score" type="string"></slot>
<slot name="_type" type="string"></slot>
</record>
<record id="26" template="HealthStatusRecord">
<slot name="ScoreType" type="string">HealthStatusRecord</slot>
<slot name="_score_ScoreType" type="string">CORRECT</slot>
<slot name="source" type="string">C:\i2b2 eval\Subsets\Test\235.txt</slot>
<slot name="_score_source" type="string">CORRECT</slot>
<slot name="region" type="region">
<region end="3353" start="3343">tenderness</region>
</slot>
<slot name="_score_region" type="string">CORRECT</slot>
<slot name="rule" type="string">HealthStatusItemPkg/0</slot>
<slot name="ConceptName" type="string">TENDERNESS</slot>
```

<slot name="\_score\_ConceptName" type="string">INCORRECT</slot>  
<slot name="SemanticType" type="string">Sign or Symptom</slot>  
<slot name="BodyLocations" type="string">CHEST</slot>  
<slot name="\_score\_BodyLocations" type="string">CORRECT</slot>  
<slot name="SeverityStrings" type="string">NO</slot>  
<slot name="UMLS\_CUI" type="string">C0234233</slot>  
<slot name="DaysBeforeDeath" type="int">0</slot>  
<slot name="PAIN" type="string">Y</slot>  
<slot name="MaxPain" type="int">1</slot>  
<slot name="SeverityScale" type="int">0</slot>  
<slot name="\_score\_SeverityScale" type="string">CORRECT</slot>  
<slot name="polarity" type="string">POSITIVE</slot>  
<slot name="DocType" type="string"></slot>  
<slot name="PatientID" type="int">0</slot>  
<slot name="DateObject" type="record"/>  
<slot name="enddate" type="date">  
<date day="26" month="5" year="2005"/>  
</slot>  
<slot name="\_score\_enddate" type="string">CORRECT</slot>  
<slot name="startdate" type="date">  
<date day="26" month="5" year="2005"/>  
</slot>  
<slot name="\_score\_startdate" type="string">CORRECT</slot>  
<slot name="Patient" type="string">PATIENT</slot>  
<slot name="\_score\_Patient" type="string">CORRECT</slot>

```
<slot name="_keyref" type="record">
<record ref="25"/>
</slot>
<slot name="_score" type="string">INCORRECT</slot>
<slot name="_type" type="string"></slot>
</record>
<record id="27" template="HealthStatusRecord">
<slot name="ScoreType" type="string">HealthStatusRecord</slot>
<slot name="_score_ScoreType" type="string"></slot>
<slot name="source" type="string">C:\i2b2 eval\Subsets\Test\235.txt</slot>
<slot name="_score_source" type="string"></slot>
<slot name="region" type="region">
<region end="2498" start="2491">burning</region>
</slot>
<slot name="_score_region" type="string"></slot>
<slot name="rule" type="string">HealthStatusItemPkg/0</slot>
<slot name="ConceptName" type="string">BURNING PAINS</slot>
<slot name="_score_ConceptName" type="string"></slot>
<slot name="SemanticType" type="string">Sign or Symptom</slot>
<slot name="BodyLocations" type="string">CHEST</slot>
<slot name="_score_BodyLocations" type="string"></slot>
<slot name="SeverityStrings" type="string"></slot>
<slot name="UMLS_CUI" type="string">C0234230</slot>
<slot name="DaysBeforeDeath" type="int">0</slot>
<slot name="PAIN" type="string">Y</slot>
```

```
<slot name="MaxPain" type="int">1</slot>
<slot name="SeverityScale" type="int">1</slot>
<slot name="_score_SeverityScale" type="string"></slot>
<slot name="polarity" type="string">POSITIVE</slot>
<slot name="DocType" type="string"></slot>
<slot name="PatientID" type="int">0</slot>
<slot name="DateObject" type="record"/>
<slot name="enddate" type="date">
<date day="26" month="5" year="2005"/>
</slot>
<slot name="_score_enddate" type="string"></slot>
<slot name="startdate" type="date">
<date day="26" month="5" year="2005"/>
</slot>
<slot name="_score_startdate" type="string"></slot>
<slot name="Patient" type="string">PATIENT</slot>
<slot name="_score_Patient" type="string"></slot>
<slot name="_keyref" type="record"/>
<slot name="_score" type="string"></slot>
<slot name="_type" type="string"></slot>
</record>
<record id="28" template="HealthStatusRecord">
<slot name="ScoreType" type="string">HealthStatusRecord</slot>
<slot name="_score_ScoreType" type="string">SPURIOUS</slot>
<slot name="source" type="string">C:\i2b2 eval\Subsets\Test\235.txt</slot>
```

<slot name="\_score\_source" type="string">SPURIOUS</slot>  
<slot name="region" type="region">  
<region end="4040" start="4030">chest pain</region>  
</slot>  
<slot name="\_score\_region" type="string">SPURIOUS</slot>  
<slot name="rule" type="string">HealthStatusItemPkg/0</slot>  
<slot name="ConceptName" type="string">CHEST PAIN</slot>  
<slot name="\_score\_ConceptName" type="string">SPURIOUS</slot>  
<slot name="SemanticType" type="string">Sign or Symptom</slot>  
<slot name="BodyLocations" type="string">CHEST</slot>  
<slot name="\_score\_BodyLocations" type="string">SPURIOUS</slot>  
<slot name="SeverityStrings" type="string">RECURRENT</slot>  
<slot name="UMLS\_CUI" type="string">C0008031</slot>  
<slot name="DaysBeforeDeath" type="int">0</slot>  
<slot name="PAIN" type="string">Y</slot>  
<slot name="MaxPain" type="int">1</slot>  
<slot name="SeverityScale" type="int">1</slot>  
<slot name="\_score\_SeverityScale" type="string">SPURIOUS</slot>  
<slot name="polarity" type="string">POSITIVE</slot>  
<slot name="DocType" type="string"></slot>  
<slot name="PatientID" type="int">0</slot>  
<slot name="DateObject" type="record"/>  
<slot name="enddate" type="date">  
<date day="26" month="5" year="2005"/>  
</slot>

```
<slot name="_score_enddate" type="string">SPURIOUS</slot>
<slot name="startdate" type="date">
<date day="26" month="5" year="2005"/>
</slot>
<slot name="_score_startdate" type="string">SPURIOUS</slot>
<slot name="Patient" type="string">PATIENT</slot>
<slot name="_score_Patient" type="string">SPURIOUS</slot>
<slot name="_keyref" type="record"/>
<slot name="_score" type="string">SPURIOUS</slot>
<slot name="_type" type="string"></slot>
</record>
<record id="29" template="HealthStatusRecord">
<slot name="ScoreType" type="string">HealthStatusRecord</slot>
<slot name="_score_ScoreType" type="string"></slot>
<slot name="source" type="string">C:\i2b2 eval\Subsets\Test\235.txt</slot>
<slot name="_score_source" type="string"></slot>
<slot name="region" type="region">
<region end="2691" start="2687">pain</region>
</slot>
<slot name="_score_region" type="string"></slot>
<slot name="rule" type="string">HealthStatusItemPkg/0</slot>
<slot name="ConceptName" type="string">PAIN</slot>
<slot name="_score_ConceptName" type="string"></slot>
<slot name="SemanticType" type="string">Sign or Symptom</slot>
<slot name="BodyLocations" type="string">CHEST</slot>
```

<slot name="\_score\_BodyLocations" type="string"></slot>  
<slot name="SeverityStrings" type="string"></slot>  
<slot name="UMLS\_CUI" type="string">C0030193</slot>  
<slot name="DaysBeforeDeath" type="int">0</slot>  
<slot name="PAIN" type="string">Y</slot>  
<slot name="MaxPain" type="int">1</slot>  
<slot name="SeverityScale" type="int">1</slot>  
<slot name="\_score\_SeverityScale" type="string"></slot>  
<slot name="polarity" type="string">POSITIVE</slot>  
<slot name="DocType" type="string"></slot>  
<slot name="PatientID" type="int">0</slot>  
<slot name="DateObject" type="record"/>  
<slot name="enddate" type="date">  
<date day="26" month="5" year="2005"/>  
</slot>  
<slot name="\_score\_enddate" type="string"></slot>  
<slot name="startdate" type="date">  
<date day="26" month="5" year="2005"/>  
</slot>  
<slot name="\_score\_startdate" type="string"></slot>  
<slot name="Patient" type="string">PATIENT</slot>  
<slot name="\_score\_Patient" type="string"></slot>  
<slot name="\_keyref" type="record"/>  
<slot name="\_score" type="string"></slot>  
<slot name="\_type" type="string"></slot>



```
</record>
<record id="30" template="HealthStatusRecord">
  <slot name="ScoreType" type="string">HealthStatusRecord</slot>
  <slot name="_score_ScoreType" type="string">CORRECT</slot>
  <slot name="source" type="string">C:\i2b2 eval\Subsets\Test\235.txt</slot>
  <slot name="_score_source" type="string">CORRECT</slot>
  <slot name="region" type="region">
    <region end="2691" start="2687">pain</region>
  </slot>
  <slot name="_score_region" type="string">CORRECT</slot>
  <slot name="rule" type="string">HealthStatusItemPkg/0</slot>
  <slot name="ConceptName" type="string">PAIN</slot>
  <slot name="_score_ConceptName" type="string">CORRECT</slot>
  <slot name="SemanticType" type="string">Sign or Symptom</slot>
  <slot name="BodyLocations" type="string"></slot>
  <slot name="_score_BodyLocations" type="string">MISSING</slot>
  <slot name="SeverityStrings" type="string"></slot>
  <slot name="UMLS_CUI" type="string">C0030193</slot>
  <slot name="DaysBeforeDeath" type="int">0</slot>
  <slot name="PAIN" type="string">Y</slot>
  <slot name="MaxPain" type="int">1</slot>
  <slot name="SeverityScale" type="int">1</slot>
  <slot name="_score_SeverityScale" type="string">CORRECT</slot>
  <slot name="polarity" type="string">POSITIVE</slot>
  <slot name="DocType" type="string"></slot>
```

```
<slot name="PatientID" type="int">0</slot>
<slot name="DateObject" type="record"/>
<slot name="enddate" type="date">
<date day="26" month="5" year="2005"/>
</slot>
<slot name="_score_enddate" type="string">CORRECT</slot>
<slot name="startdate" type="date">
<date day="26" month="5" year="2005"/>
</slot>
<slot name="_score_startdate" type="string">CORRECT</slot>
<slot name="Patient" type="string">PATIENT</slot>
<slot name="_score_Patient" type="string">CORRECT</slot>
<slot name="_keyref" type="record">
<record ref="29"/>
</slot>
<slot name="_score" type="string">INCORRECT</slot>
<slot name="_type" type="string"></slot>
</record>
<record id="31" template="HealthStatusRecord">
<slot name="ScoreType" type="string">HealthStatusRecord</slot>
<slot name="_score_ScoreType" type="string"></slot>
<slot name="source" type="string">C:\i2b2 eval\Subsets\Test\235.txt</slot>
<slot name="_score_source" type="string"></slot>
<slot name="region" type="region">
<region end="3675" start="3668">burning</region>
```

</slot>  
<slot name="\_score\_region" type="string"></slot>  
<slot name="rule" type="string">HealthStatusItemPkg/0</slot>  
<slot name="ConceptName" type="string">CHEST PAIN UNSPECIFIED</slot>  
<slot name="\_score\_ConceptName" type="string"></slot>  
<slot name="SemanticType" type="string">Sign or Symptom</slot>  
<slot name="BodyLocations" type="string">CHEST</slot>  
<slot name="\_score\_BodyLocations" type="string"></slot>  
<slot name="SeverityStrings" type="string"></slot>  
<slot name="UMLS\_CUI" type="string">C1535568</slot>  
<slot name="DaysBeforeDeath" type="int">0</slot>  
<slot name="PAIN" type="string">Y</slot>  
<slot name="MaxPain" type="int">1</slot>  
<slot name="SeverityScale" type="int">1</slot>  
<slot name="\_score\_SeverityScale" type="string"></slot>  
<slot name="polarity" type="string">POSITIVE</slot>  
<slot name="DocType" type="string"></slot>  
<slot name="PatientID" type="int">0</slot>  
<slot name="DateObject" type="record"/>  
<slot name="enddate" type="date">  
<date day="26" month="5" year="2005"/>  
</slot>  
<slot name="\_score\_enddate" type="string"></slot>  
<slot name="startdate" type="date">  
<date day="26" month="5" year="2005"/>

```
</slot>
<slot name="_score_startdate" type="string"></slot>
<slot name="Patient" type="string">PATIENT</slot>
<slot name="_score_Patient" type="string"></slot>
<slot name="_keyref" type="record"/>
<slot name="_score" type="string"></slot>
<slot name="_type" type="string"></slot>
</record>
<record id="32" template="HealthStatusRecord">
<slot name="ScoreType" type="string">HealthStatusRecord</slot>
<slot name="_score_ScoreType" type="string">CORRECT</slot>
<slot name="source" type="string">C:\i2b2 eval\Subsets\Test\235.txt</slot>
<slot name="_score_source" type="string">CORRECT</slot>
<slot name="region" type="region">
<region end="3675" start="3668">burning</region>
</slot>
<slot name="_score_region" type="string">CORRECT</slot>
<slot name="rule" type="string">HealthStatusItemPkg/0</slot>
<slot name="ConceptName" type="string">BURNING PAINS</slot>
<slot name="_score_ConceptName" type="string">INCORRECT</slot>
<slot name="SemanticType" type="string">Sign or Symptom</slot>
<slot name="BodyLocations" type="string">CHEST</slot>
<slot name="_score_BodyLocations" type="string">CORRECT</slot>
<slot name="SeverityStrings" type="string"></slot>
<slot name="UMLS_CUI" type="string">C0234230</slot>
```

```
<slot name="DaysBeforeDeath" type="int">0</slot>
<slot name="PAIN" type="string">Y</slot>
<slot name="MaxPain" type="int">1</slot>
<slot name="SeverityScale" type="int">1</slot>
<slot name="_score_SeverityScale" type="string">CORRECT</slot>
<slot name="polarity" type="string">POSITIVE</slot>
<slot name="DocType" type="string"></slot>
<slot name="PatientID" type="int">0</slot>
<slot name="DateObject" type="record"/>
<slot name="enddate" type="date">
<date day="26" month="5" year="2005"/>
</slot>
<slot name="_score_enddate" type="string">CORRECT</slot>
<slot name="startdate" type="date">
<date day="26" month="5" year="2005"/>
</slot>
<slot name="_score_startdate" type="string">CORRECT</slot>
<slot name="Patient" type="string">PATIENT</slot>
<slot name="_score_Patient" type="string">CORRECT</slot>
<slot name="_keyref" type="record">
<record ref="31"/>
</slot>
<slot name="_score" type="string">INCORRECT</slot>
<slot name="_type" type="string"></slot>
</record>
```

```
</records>
</infStore>
<?xml version="1.0" encoding="UTF-8"?>
<infStore>
<records>
<record id="0" template="HealthStatusRecord">
<slot name="ScoreType" type="string">HealthStatusRecord</slot>
<slot name="_score_ScoreType" type="string"></slot>
<slot name="source" type="string">C:\i2b2 eval\Subsets\Test\239.txt</slot>
<slot name="_score_source" type="string"></slot>
<slot name="region" type="region">
<region end="1188" start="1179">back pain</region>
</slot>
<slot name="_score_region" type="string"></slot>
<slot name="rule" type="string">HealthStatusItemPkg/0</slot>
<slot name="ConceptName" type="string">BACK PAINS</slot>
<slot name="_score_ConceptName" type="string"></slot>
<slot name="SemanticType" type="string">Sign or Symptom</slot>
<slot name="BodyLocations" type="string">BACK</slot>
<slot name="_score_BodyLocations" type="string"></slot>
<slot name="SeverityStrings" type="string"></slot>
<slot name="UMLS_CUI" type="string">C0004604</slot>
<slot name="DaysBeforeDeath" type="int">0</slot>
<slot name="PAIN" type="string">Y</slot>
<slot name="MaxPain" type="int">1</slot>
```

```
<slot name="SeverityScale" type="int">1</slot>
<slot name="_score_SeverityScale" type="string"></slot>
<slot name="polarity" type="string">POSITIVE</slot>
<slot name="DocType" type="string"></slot>
<slot name="PatientID" type="int">0</slot>
<slot name="DateObject" type="record"/>
<slot name="enddate" type="date">
<date day="30" month="9" year="2004"/>
</slot>
<slot name="_score_enddate" type="string"></slot>
<slot name="startdate" type="date">
<date day="1" month="9" year="2004"/>
</slot>
<slot name="_score_startdate" type="string"></slot>
<slot name="Patient" type="string">PATIENT</slot>
<slot name="_score_Patient" type="string"></slot>
<slot name="_keyref" type="record"/>
<slot name="_score" type="string"></slot>
<slot name="_type" type="string"></slot>
</record>
<record id="1" template="HealthStatusRecord">
<slot name="ScoreType" type="string">HealthStatusRecord</slot>
<slot name="_score_ScoreType" type="string">CORRECT</slot>
<slot name="source" type="string">C:\i2b2 eval\Subsets\Test\239.txt</slot>
<slot name="_score_source" type="string">CORRECT</slot>
```

<slot name="region" type="region">  
<region end="1188" start="1179">back pain</region>  
</slot>  
<slot name="\_score\_region" type="string">CORRECT</slot>  
<slot name="rule" type="string">HealthStatusItemPkg/0</slot>  
<slot name="ConceptName" type="string">BACK PAINS</slot>  
<slot name="\_score\_ConceptName" type="string">CORRECT</slot>  
<slot name="SemanticType" type="string">Sign or Symptom</slot>  
<slot name="BodyLocations" type="string">BACK</slot>  
<slot name="\_score\_BodyLocations" type="string">CORRECT</slot>  
<slot name="SeverityStrings" type="string"></slot>  
<slot name="UMLS\_CUI" type="string">C0004604</slot>  
<slot name="DaysBeforeDeath" type="int">0</slot>  
<slot name="PAIN" type="string">Y</slot>  
<slot name="MaxPain" type="int">1</slot>  
<slot name="SeverityScale" type="int">1</slot>  
<slot name="\_score\_SeverityScale" type="string">CORRECT</slot>  
<slot name="polarity" type="string">POSITIVE</slot>  
<slot name="DocType" type="string"></slot>  
<slot name="PatientID" type="int">0</slot>  
<slot name="DateObject" type="record"/>  
<slot name="enddate" type="date">  
<date day="29" month="3" year="2005"/>  
</slot>  
<slot name="\_score\_enddate" type="string">INCORRECT</slot>



```
<slot name="startdate" type="date">
<date day="29" month="3" year="2005"/>
</slot>
<slot name="_score_startdate" type="string">INCORRECT</slot>
<slot name="Patient" type="string">PATIENT</slot>
<slot name="_score_Patient" type="string">CORRECT</slot>
<slot name="_keyref" type="record">
<record ref="0"/>
</slot>
<slot name="_score" type="string">INCORRECT</slot>
<slot name="_type" type="string"></slot>
</record>
<record id="2" template="HealthStatusRecord">
<slot name="ScoreType" type="string">HealthStatusRecord</slot>
<slot name="_score_ScoreType" type="string"></slot>
<slot name="source" type="string">C:\i2b2 eval\Subsets\Test\239.txt</slot>
<slot name="_score_source" type="string"></slot>
<slot name="region" type="region">
<region end="3615" start="3605">tenderness</region>
</slot>
<slot name="_score_region" type="string"></slot>
<slot name="rule" type="string">HealthStatusItemPkg/0</slot>
<slot name="ConceptName" type="string">TENDERNESS</slot>
<slot name="_score_ConceptName" type="string"></slot>
<slot name="SemanticType" type="string">Sign or Symptom</slot>
```

<slot name="BodyLocations" type="string">CHEST</slot>  
<slot name="\_score\_BodyLocations" type="string"></slot>  
<slot name="SeverityStrings" type="string">NO</slot>  
<slot name="UMLS\_CUI" type="string">C0234233</slot>  
<slot name="DaysBeforeDeath" type="int">0</slot>  
<slot name="PAIN" type="string">Y</slot>  
<slot name="MaxPain" type="int">1</slot>  
<slot name="SeverityScale" type="int">0</slot>  
<slot name="\_score\_SeverityScale" type="string"></slot>  
<slot name="polarity" type="string">POSITIVE</slot>  
<slot name="DocType" type="string"></slot>  
<slot name="PatientID" type="int">0</slot>  
<slot name="DateObject" type="record"/>  
<slot name="enddate" type="date">  
<date day="29" month="3" year="2005"/>  
</slot>  
<slot name="\_score\_enddate" type="string"></slot>  
<slot name="startdate" type="date">  
<date day="29" month="3" year="2005"/>  
</slot>  
<slot name="\_score\_startdate" type="string"></slot>  
<slot name="Patient" type="string">PATIENT</slot>  
<slot name="\_score\_Patient" type="string"></slot>  
<slot name="\_keyref" type="record"/>  
<slot name="\_score" type="string"></slot>

```
<slot name="_type" type="string"></slot>
</record>
<record id="3" template="HealthStatusRecord">
  <slot name="ScoreType" type="string">HealthStatusRecord</slot>
  <slot name="_score_ScoreType" type="string">CORRECT</slot>
  <slot name="source" type="string">C:\i2b2 eval\Subsets\Test\239.txt</slot>
  <slot name="_score_source" type="string">CORRECT</slot>
  <slot name="region" type="region">
    <region end="3615" start="3605">tenderness</region>
  </slot>
  <slot name="_score_region" type="string">CORRECT</slot>
  <slot name="rule" type="string">HealthStatusItemPkg/0</slot>
  <slot name="ConceptName" type="string">TENDERNESS</slot>
  <slot name="_score_ConceptName" type="string">CORRECT</slot>
  <slot name="SemanticType" type="string">Sign or Symptom</slot>
  <slot name="BodyLocations" type="string"></slot>
  <slot name="_score_BodyLocations" type="string">MISSING</slot>
  <slot name="SeverityStrings" type="string">NO</slot>
  <slot name="UMLS_CUI" type="string">C0234233</slot>
  <slot name="DaysBeforeDeath" type="int">0</slot>
  <slot name="PAIN" type="string">Y</slot>
  <slot name="MaxPain" type="int">1</slot>
  <slot name="SeverityScale" type="int">0</slot>
  <slot name="_score_SeverityScale" type="string">CORRECT</slot>
  <slot name="polarity" type="string">POSITIVE</slot>
```

```
<slot name="DocType" type="string"></slot>
<slot name="PatientID" type="int">0</slot>
<slot name="DateObject" type="record"/>
<slot name="enddate" type="date">
<date day="29" month="3" year="2005"/>
</slot>
<slot name="_score_enddate" type="string">CORRECT</slot>
<slot name="startdate" type="date">
<date day="29" month="3" year="2005"/>
</slot>
<slot name="_score_startdate" type="string">CORRECT</slot>
<slot name="Patient" type="string">PATIENT</slot>
<slot name="_score_Patient" type="string">CORRECT</slot>
<slot name="_keyref" type="record">
<record ref="2"/>
</slot>
<slot name="_score" type="string">INCORRECT</slot>
<slot name="_type" type="string"></slot>
</record>
<record id="4" template="HealthStatusRecord">
<slot name="ScoreType" type="string">HealthStatusRecord</slot>
<slot name="_score_ScoreType" type="string"></slot>
<slot name="source" type="string">C:\i2b2 eval\Subsets\Test\239.txt</slot>
<slot name="_score_source" type="string"></slot>
<slot name="region" type="region">
```

<region end="1188" start="1179">back pain</region>  
</slot>  
<slot name="\_score\_region" type="string"></slot>  
<slot name="rule" type="string">HealthStatusItemPkg/0</slot>  
<slot name="ConceptName" type="string">BACK PAINS</slot>  
<slot name="\_score\_ConceptName" type="string"></slot>  
<slot name="SemanticType" type="string">Sign or Symptom</slot>  
<slot name="BodyLocations" type="string">BACK</slot>  
<slot name="\_score\_BodyLocations" type="string"></slot>  
<slot name="SeverityStrings" type="string"></slot>  
<slot name="UMLS\_CUI" type="string">C0004604</slot>  
<slot name="DaysBeforeDeath" type="int">0</slot>  
<slot name="PAIN" type="string">Y</slot>  
<slot name="MaxPain" type="int">1</slot>  
<slot name="SeverityScale" type="int">1</slot>  
<slot name="\_score\_SeverityScale" type="string"></slot>  
<slot name="polarity" type="string">POSITIVE</slot>  
<slot name="DocType" type="string"></slot>  
<slot name="PatientID" type="int">0</slot>  
<slot name="DateObject" type="record"/>  
<slot name="enddate" type="date">  
<date day="30" month="9" year="2004"/>  
</slot>  
<slot name="\_score\_enddate" type="string"></slot>  
<slot name="startdate" type="date">

```
<date day="1" month="9" year="2004"/>
</slot>
<slot name="_score_startdate" type="string"></slot>
<slot name="Patient" type="string">PATIENT</slot>
<slot name="_score_Patient" type="string"></slot>
<slot name="_keyref" type="record"/>
<slot name="_score" type="string"></slot>
<slot name="_type" type="string"></slot>
</record>
<record id="5" template="HealthStatusRecord">
<slot name="ScoreType" type="string">HealthStatusRecord</slot>
<slot name="_score_ScoreType" type="string"></slot>
<slot name="source" type="string">C:\i2b2 eval\Subsets\Test\239.txt</slot>
<slot name="_score_source" type="string"></slot>
<slot name="region" type="region">
<region end="3615" start="3605">tenderness</region>
</slot>
<slot name="_score_region" type="string"></slot>
<slot name="rule" type="string">HealthStatusItemPkg/0</slot>
<slot name="ConceptName" type="string">TENDERNESS</slot>
<slot name="_score_ConceptName" type="string"></slot>
<slot name="SemanticType" type="string">Sign or Symptom</slot>
<slot name="BodyLocations" type="string">CHEST</slot>
<slot name="_score_BodyLocations" type="string"></slot>
<slot name="SeverityStrings" type="string">NO</slot>
```

```
<slot name="UMLS_CUI" type="string">C0234233</slot>
<slot name="DaysBeforeDeath" type="int">0</slot>
<slot name="PAIN" type="string">Y</slot>
<slot name="MaxPain" type="int">1</slot>
<slot name="SeverityScale" type="int">0</slot>
<slot name="_score_SeverityScale" type="string"></slot>
<slot name="polarity" type="string">POSITIVE</slot>
<slot name="DocType" type="string"></slot>
<slot name="PatientID" type="int">0</slot>
<slot name="DateObject" type="record"/>
<slot name="enddate" type="date">
<date day="29" month="3" year="2005"/>
</slot>
<slot name="_score_enddate" type="string"></slot>
<slot name="startdate" type="date">
<date day="29" month="3" year="2005"/>
</slot>
<slot name="_score_startdate" type="string"></slot>
<slot name="Patient" type="string">PATIENT</slot>
<slot name="_score_Patient" type="string"></slot>
<slot name="_keyref" type="record"/>
<slot name="_score" type="string"></slot>
<slot name="_type" type="string"></slot>
</record>
</records>
```

```
</infStore>
<?xml version="1.0" encoding="UTF-8"?>
<infStore>
<records>
<record id="0" template="HealthStatusRecord">
<slot name="ScoreType" type="string">HealthStatusRecord</slot>
<slot name="_score_ScoreType" type="string"></slot>
<slot name="source" type="string">C:\i2b2 eval\Subsets\Test\260.txt</slot>
<slot name="_score_source" type="string"></slot>
<slot name="region" type="region">
<region end="4177" start="4173">pain</region>
</slot>
<slot name="_score_region" type="string"></slot>
<slot name="rule" type="string">HealthStatusItemPkg/0</slot>
<slot name="ConceptName" type="string">PAIN</slot>
<slot name="_score_ConceptName" type="string"></slot>
<slot name="SemanticType" type="string">Sign or Symptom</slot>
<slot name="BodyLocations" type="string"></slot>
<slot name="_score_BodyLocations" type="string"></slot>
<slot name="SeverityStrings" type="string">CONTROLLED</slot>
<slot name="UMLS_CUI" type="string">C0030193</slot>
<slot name="DaysBeforeDeath" type="int">0</slot>
<slot name="PAIN" type="string">Y</slot>
<slot name="MaxPain" type="int">2</slot>
<slot name="SeverityScale" type="int">2</slot>
```



```
<slot name="_score_SeverityScale" type="string"></slot>
<slot name="polarity" type="string">POSITIVE</slot>
<slot name="DocType" type="string"></slot>
<slot name="PatientID" type="int">0</slot>
<slot name="DateObject" type="record"/>
<slot name="enddate" type="date">
<date day="1" month="8" year="2006"/>
</slot>
<slot name="_score_enddate" type="string"></slot>
<slot name="startdate" type="date">
<date day="1" month="8" year="2006"/>
</slot>
<slot name="_score_startdate" type="string"></slot>
<slot name="Patient" type="string">PATIENT</slot>
<slot name="_score_Patient" type="string"></slot>
<slot name="_keyref" type="record"/>
<slot name="_score" type="string"></slot>
<slot name="_type" type="string"></slot>
</record>
<record id="1" template="HealthStatusRecord">
<slot name="ScoreType" type="string">HealthStatusRecord</slot>
<slot name="_score_ScoreType" type="string"></slot>
<slot name="source" type="string">C:\i2b2 eval\Subsets\Test\260.txt</slot>
<slot name="_score_source" type="string"></slot>
<slot name="region" type="region">
```

<region end="4177" start="4173">pain</region>  
</slot>  
<slot name="\_score\_region" type="string"></slot>  
<slot name="rule" type="string">HealthStatusItemPkg/0</slot>  
<slot name="ConceptName" type="string">PAIN</slot>  
<slot name="\_score\_ConceptName" type="string"></slot>  
<slot name="SemanticType" type="string">Sign or Symptom</slot>  
<slot name="BodyLocations" type="string"></slot>  
<slot name="\_score\_BodyLocations" type="string"></slot>  
<slot name="SeverityStrings" type="string">CONTROLLED</slot>  
<slot name="UMLS\_CUI" type="string">C0030193</slot>  
<slot name="DaysBeforeDeath" type="int">0</slot>  
<slot name="PAIN" type="string">Y</slot>  
<slot name="MaxPain" type="int">2</slot>  
<slot name="SeverityScale" type="int">2</slot>  
<slot name="\_score\_SeverityScale" type="string"></slot>  
<slot name="polarity" type="string">POSITIVE</slot>  
<slot name="DocType" type="string"></slot>  
<slot name="PatientID" type="int">0</slot>  
<slot name="DateObject" type="record"/>  
<slot name="enddate" type="date">  
<date day="1" month="8" year="2006"/>  
</slot>  
<slot name="\_score\_enddate" type="string"></slot>  
<slot name="startdate" type="date">

```
<date day="1" month="8" year="2006"/>
</slot>
<slot name="_score_startdate" type="string"></slot>
<slot name="Patient" type="string">PATIENT</slot>
<slot name="_score_Patient" type="string"></slot>
<slot name="_keyref" type="record"/>
<slot name="_score" type="string"></slot>
<slot name="_type" type="string"></slot>
</record>
<record id="2" template="HealthStatusRecord">
<slot name="ScoreType" type="string">HealthStatusRecord</slot>
<slot name="_score_ScoreType" type="string">CORRECT</slot>
<slot name="source" type="string">C:\i2b2 eval\Subsets\Test\260.txt</slot>
<slot name="_score_source" type="string">CORRECT</slot>
<slot name="region" type="region">
<region end="4177" start="4173">pain</region>
</slot>
<slot name="_score_region" type="string">CORRECT</slot>
<slot name="rule" type="string">HealthStatusItemPkg/0</slot>
<slot name="ConceptName" type="string">PAIN</slot>
<slot name="_score_ConceptName" type="string">CORRECT</slot>
<slot name="SemanticType" type="string">Sign or Symptom</slot>
<slot name="BodyLocations" type="string"></slot>
<slot name="_score_BodyLocations" type="string"></slot>
<slot name="SeverityStrings" type="string">CONTROLLED</slot>
```

<slot name="UMLS\_CUI" type="string">C0030193</slot>  
<slot name="DaysBeforeDeath" type="int">0</slot>  
<slot name="PAIN" type="string">Y</slot>  
<slot name="MaxPain" type="int">2</slot>  
<slot name="SeverityScale" type="int">2</slot>  
<slot name="\_score\_SeverityScale" type="string">CORRECT</slot>  
<slot name="polarity" type="string">POSITIVE</slot>  
<slot name="DocType" type="string"></slot>  
<slot name="PatientID" type="int">0</slot>  
<slot name="DateObject" type="record"/>  
<slot name="enddate" type="date">  
<date day="30" month="7" year="2006"/>  
</slot>  
<slot name="\_score\_enddate" type="string">INCORRECT</slot>  
<slot name="startdate" type="date">  
<date day="30" month="7" year="2006"/>  
</slot>  
<slot name="\_score\_startdate" type="string">INCORRECT</slot>  
<slot name="Patient" type="string">PATIENT</slot>  
<slot name="\_score\_Patient" type="string">CORRECT</slot>  
<slot name="\_keyref" type="record">  
<record ref="1"/>  
</slot>  
<slot name="\_score" type="string">INCORRECT</slot>  
<slot name="\_type" type="string"></slot>

```
</record>
<record id="3" template="HealthStatusRecord">
  <slot name="ScoreType" type="string">HealthStatusRecord</slot>
  <slot name="_score_ScoreType" type="string">SPURIOUS</slot>
  <slot name="source" type="string">C:\i2b2 eval\Subsets\Test\260.txt</slot>
  <slot name="_score_source" type="string">SPURIOUS</slot>
  <slot name="region" type="region">
    <region end="4845" start="4841">pain</region>
  </slot>
  <slot name="_score_region" type="string">SPURIOUS</slot>
  <slot name="rule" type="string">HealthStatusItemPkg/0</slot>
  <slot name="ConceptName" type="string">PAIN</slot>
  <slot name="_score_ConceptName" type="string">SPURIOUS</slot>
  <slot name="SemanticType" type="string">Sign or Symptom</slot>
  <slot name="BodyLocations" type="string"></slot>
  <slot name="_score_BodyLocations" type="string"></slot>
  <slot name="SeverityStrings" type="string"></slot>
  <slot name="UMLS_CUI" type="string">C0030193</slot>
  <slot name="DaysBeforeDeath" type="int">0</slot>
  <slot name="PAIN" type="string">Y</slot>
  <slot name="MaxPain" type="int">2</slot>
  <slot name="SeverityScale" type="int">1</slot>
  <slot name="_score_SeverityScale" type="string">SPURIOUS</slot>
  <slot name="polarity" type="string">POSITIVE</slot>
  <slot name="DocType" type="string"></slot>
```

```
<slot name="PatientID" type="int">0</slot>
<slot name="DateObject" type="record"/>
<slot name="enddate" type="date">
<date day="31" month="12" year="2006"/>
</slot>
<slot name="_score_enddate" type="string">SPURIOUS</slot>
<slot name="startdate" type="date">
<date day="1" month="10" year="2006"/>
</slot>
<slot name="_score_startdate" type="string">SPURIOUS</slot>
<slot name="Patient" type="string">PATIENT</slot>
<slot name="_score_Patient" type="string">SPURIOUS</slot>
<slot name="_keyref" type="record"/>
<slot name="_score" type="string">SPURIOUS</slot>
<slot name="_type" type="string"></slot>
</record>
<record id="4" template="HealthStatusRecord">
<slot name="ScoreType" type="string">HealthStatusRecord</slot>
<slot name="_score_ScoreType" type="string">CORRECT</slot>
<slot name="source" type="string">C:\i2b2 eval\Subsets\Test\260.txt</slot>
<slot name="_score_source" type="string">CORRECT</slot>
<slot name="region" type="region">
<region end="3819" start="3815">pain</region>
</slot>
<slot name="_score_region" type="string">CORRECT</slot>
```

<slot name="rule" type="string">HealthStatusItemPkg/0</slot>  
<slot name="ConceptName" type="string">PAIN</slot>  
<slot name="\_score\_ConceptName" type="string">CORRECT</slot>  
<slot name="SemanticType" type="string">Sign or Symptom</slot>  
<slot name="BodyLocations" type="string">STRUCTURE OF POSTERIOR CEREBRAL ARTERY</slot>  
<slot name="\_score\_BodyLocations" type="string">CORRECT</slot>  
<slot name="SeverityStrings" type="string">WELL CONTROLLED</slot>  
<slot name="UMLS\_CUI" type="string">C0030193</slot>  
<slot name="DaysBeforeDeath" type="int">0</slot>  
<slot name="PAIN" type="string">Y</slot>  
<slot name="MaxPain" type="int">2</slot>  
<slot name="SeverityScale" type="int">2</slot>  
<slot name="\_score\_SeverityScale" type="string">CORRECT</slot>  
<slot name="polarity" type="string">POSITIVE</slot>  
<slot name="DocType" type="string"></slot>  
<slot name="PatientID" type="int">0</slot>  
<slot name="DateObject" type="record"/>  
<slot name="enddate" type="date">  
<date day="30" month="7" year="2006"/>  
</slot>  
<slot name="\_score\_enddate" type="string">CORRECT</slot>  
<slot name="startdate" type="date">  
<date day="30" month="7" year="2006"/>  
</slot>

```
<slot name="_score_startdate" type="string">CORRECT</slot>
<slot name="Patient" type="string">PATIENT</slot>
<slot name="_score_Patient" type="string">CORRECT</slot>
<slot name="_keyref" type="record"/>
<slot name="_score" type="string">CORRECT</slot>
<slot name="_type" type="string"></slot>
</record>
<record id="5" template="HealthStatusRecord">
<slot name="ScoreType" type="string">HealthStatusRecord</slot>
<slot name="_score_ScoreType" type="string">CORRECT</slot>
<slot name="source" type="string">C:\i2b2 eval\Subsets\Test\260.txt</slot>
<slot name="_score_source" type="string">CORRECT</slot>
<slot name="region" type="region">
<region end="3105" start="3091">CVA tenderness</region>
</slot>
<slot name="_score_region" type="string">CORRECT</slot>
<slot name="rule" type="string">HealthStatusItemPkg/0</slot>
<slot name="ConceptName" type="string">RENAL ANGLE TENDERNESS</slot>
<slot name="_score_ConceptName" type="string">CORRECT</slot>
<slot name="SemanticType" type="string">Sign or Symptom</slot>
<slot name="BodyLocations" type="string">COSTOVERTEBRAL ANGLE</slot>
<slot name="_score_BodyLocations" type="string">CORRECT</slot>
<slot name="SeverityStrings" type="string">NO</slot>
<slot name="UMLS_CUI" type="string">C0235634</slot>
<slot name="DaysBeforeDeath" type="int">0</slot>
```



```
<slot name="PAIN" type="string">Y</slot>
<slot name="MaxPain" type="int">2</slot>
<slot name="SeverityScale" type="int">0</slot>
<slot name="_score_SeverityScale" type="string">CORRECT</slot>
<slot name="polarity" type="string">POSITIVE</slot>
<slot name="DocType" type="string"></slot>
<slot name="PatientID" type="int">0</slot>
<slot name="DateObject" type="record"/>
<slot name="enddate" type="date">
<date day="30" month="7" year="2006"/>
</slot>
<slot name="_score_enddate" type="string">CORRECT</slot>
<slot name="startdate" type="date">
<date day="30" month="7" year="2006"/>
</slot>
<slot name="_score_startdate" type="string">CORRECT</slot>
<slot name="Patient" type="string">PATIENT</slot>
<slot name="_score_Patient" type="string">CORRECT</slot>
<slot name="_keyref" type="record"/>
<slot name="_score" type="string">CORRECT</slot>
<slot name="_type" type="string"></slot>
</record>
</records>
</infStore>
<?xml version="1.0" encoding="UTF-8"?>
```

```
<infStore>
<records>
<record id="0" template="HealthStatusRecord">
<slot name="ScoreType" type="string">HealthStatusRecord</slot>
<slot name="_score_ScoreType" type="string"></slot>
<slot name="source" type="string">C:\i2b2 eval\Subsets\Test\500.txt</slot>
<slot name="_score_source" type="string"></slot>
<slot name="region" type="region">
<region end="784" start="771">shooting pain</region>
</slot>
<slot name="_score_region" type="string"></slot>
<slot name="rule" type="string">HealthStatusItemPkg/0</slot>
<slot name="ConceptName" type="string">PAIN IN LEFT LEG</slot>
<slot name="_score_ConceptName" type="string"></slot>
<slot name="SemanticType" type="string">Sign or Symptom</slot>
<slot name="BodyLocations" type="string">LEFT LEG</slot>
<slot name="_score_BodyLocations" type="string"></slot>
<slot name="SeverityStrings" type="string"></slot>
<slot name="UMLS_CUI" type="string">C0564822</slot>
<slot name="DaysBeforeDeath" type="int">0</slot>
<slot name="PAIN" type="string">Y</slot>
<slot name="MaxPain" type="int">2</slot>
<slot name="SeverityScale" type="int">1</slot>
<slot name="_score_SeverityScale" type="string"></slot>
<slot name="polarity" type="string">POSITIVE</slot>
```

```
<slot name="DocType" type="string"></slot>
<slot name="PatientID" type="int">0</slot>
<slot name="DateObject" type="record"/>
<slot name="enddate" type="date">
<date day="16" month="11" year="2004"/>
</slot>
<slot name="_score_enddate" type="string"></slot>
<slot name="startdate" type="date">
<date day="9" month="11" year="2004"/>
</slot>
<slot name="_score_startdate" type="string"></slot>
<slot name="Patient" type="string">PATIENT</slot>
<slot name="_score_Patient" type="string"></slot>
<slot name="_keyref" type="record"/>
<slot name="_score" type="string"></slot>
<slot name="_type" type="string"></slot>
</record>
<record id="1" template="HealthStatusRecord">
<slot name="ScoreType" type="string">HealthStatusRecord</slot>
<slot name="_score_ScoreType" type="string"></slot>
<slot name="source" type="string">C:\i2b2 eval\Subsets\Test\500.txt</slot>
<slot name="_score_source" type="string"></slot>
<slot name="region" type="region">
<region end="2091" start="2087">pain</region>
</slot>
```

<slot name="\_score\_region" type="string"></slot>  
<slot name="rule" type="string">HealthStatusItemPkg/0</slot>  
<slot name="ConceptName" type="string">PAIN</slot>  
<slot name="\_score\_ConceptName" type="string"></slot>  
<slot name="SemanticType" type="string">Sign or Symptom</slot>  
<slot name="BodyLocations" type="string">LOWER BACK</slot>  
<slot name="\_score\_BodyLocations" type="string"></slot>  
<slot name="SeverityStrings" type="string">MANAGED</slot>  
<slot name="UMLS\_CUI" type="string">C0030193</slot>  
<slot name="DaysBeforeDeath" type="int">0</slot>  
<slot name="PAIN" type="string">Y</slot>  
<slot name="MaxPain" type="int">2</slot>  
<slot name="SeverityScale" type="int">2</slot>  
<slot name="\_score\_SeverityScale" type="string"></slot>  
<slot name="polarity" type="string">POSITIVE</slot>  
<slot name="DocType" type="string"></slot>  
<slot name="PatientID" type="int">0</slot>  
<slot name="DateObject" type="record"/>  
<slot name="enddate" type="date">  
<date day="18" month="11" year="2004"/>  
</slot>  
<slot name="\_score\_enddate" type="string"></slot>  
<slot name="startdate" type="date">  
<date day="16" month="11" year="2004"/>  
</slot>

```
<slot name="_score_startdate" type="string"></slot>
<slot name="Patient" type="string">PATIENT</slot>
<slot name="_score_Patient" type="string"></slot>
<slot name="_keyref" type="record"/>
<slot name="_score" type="string"></slot>
<slot name="_type" type="string"></slot>
</record>
<record id="2" template="HealthStatusRecord">
<slot name="ScoreType" type="string">HealthStatusRecord</slot>
<slot name="_score_ScoreType" type="string">MISSING</slot>
<slot name="source" type="string">C:\i2b2 eval\Subsets\Test\500.txt</slot>
<slot name="_score_source" type="string">MISSING</slot>
<slot name="region" type="region">
<region end="2192" start="2188">pain</region>
</slot>
<slot name="_score_region" type="string">MISSING</slot>
<slot name="rule" type="string"></slot>
<slot name="ConceptName" type="string">PAIN</slot>
<slot name="_score_ConceptName" type="string">MISSING</slot>
<slot name="SemanticType" type="string"></slot>
<slot name="BodyLocations" type="string">LOWER BACK</slot>
<slot name="_score_BodyLocations" type="string">MISSING</slot>
<slot name="SeverityStrings" type="string"></slot>
<slot name="UMLS_CUI" type="string"></slot>
<slot name="DaysBeforeDeath" type="int">0</slot>
```

```
<slot name="PAIN" type="string">Y</slot>
<slot name="MaxPain" type="int">0</slot>
<slot name="SeverityScale" type="int">2</slot>
<slot name="_score_SeverityScale" type="string">MISSING</slot>
<slot name="polarity" type="string"></slot>
<slot name="DocType" type="string"></slot>
<slot name="PatientID" type="int">0</slot>
<slot name="DateObject" type="record"/>
<slot name="enddate" type="date">
<date day="18" month="11" year="2004"/>
</slot>
<slot name="_score_enddate" type="string">MISSING</slot>
<slot name="startdate" type="date">
<date day="16" month="11" year="2004"/>
</slot>
<slot name="_score_startdate" type="string">MISSING</slot>
<slot name="Patient" type="string"></slot>
<slot name="_score_Patient" type="string"></slot>
<slot name="_keyref" type="record"/>
<slot name="_score" type="string">MISSING</slot>
<slot name="_type" type="string"></slot>
</record>
<record id="3" template="HealthStatusRecord">
<slot name="ScoreType" type="string">HealthStatusRecord</slot>
<slot name="_score_ScoreType" type="string"></slot>
```

<slot name="source" type="string">C:\i2b2 eval\Subsets\Test\500.txt</slot>  
<slot name="\_score\_source" type="string"></slot>  
<slot name="region" type="region">  
<region end="507" start="494">low back pain</region>  
</slot>  
<slot name="\_score\_region" type="string"></slot>  
<slot name="rule" type="string">HealthStatusItemPkg/0</slot>  
<slot name="ConceptName" type="string">LOWER BACK PAINS</slot>  
<slot name="\_score\_ConceptName" type="string"></slot>  
<slot name="SemanticType" type="string">Sign or Symptom</slot>  
<slot name="BodyLocations" type="string">LOWER BACK</slot>  
<slot name="\_score\_BodyLocations" type="string"></slot>  
<slot name="SeverityStrings" type="string"></slot>  
<slot name="UMLS\_CUI" type="string">C0024031</slot>  
<slot name="DaysBeforeDeath" type="int">0</slot>  
<slot name="PAIN" type="string">Y</slot>  
<slot name="MaxPain" type="int">2</slot>  
<slot name="SeverityScale" type="int">1</slot>  
<slot name="\_score\_SeverityScale" type="string"></slot>  
<slot name="polarity" type="string">POSITIVE</slot>  
<slot name="DocType" type="string"></slot>  
<slot name="PatientID" type="int">0</slot>  
<slot name="DateObject" type="record"/>  
<slot name="enddate" type="date">  
<date day="16" month="11" year="2004"/>

```
</slot>
<slot name="_score_enddate" type="string"></slot>
<slot name="startdate" type="date">
<date day="9" month="11" year="2004"/>
</slot>
<slot name="_score_startdate" type="string"></slot>
<slot name="Patient" type="string">PATIENT</slot>
<slot name="_score_Patient" type="string"></slot>
<slot name="_keyref" type="record"/>
<slot name="_score" type="string"></slot>
<slot name="_type" type="string"></slot>
</record>
<record id="4" template="HealthStatusRecord">
<slot name="ScoreType" type="string">HealthStatusRecord</slot>
<slot name="_score_ScoreType" type="string"></slot>
<slot name="source" type="string">C:\i2b2 eval\Subsets\Test\500.txt</slot>
<slot name="_score_source" type="string"></slot>
<slot name="region" type="region">
<region end="631" start="627">pain</region>
</slot>
<slot name="_score_region" type="string"></slot>
<slot name="rule" type="string">HealthStatusItemPkg/0</slot>
<slot name="ConceptName" type="string">PAIN</slot>
<slot name="_score_ConceptName" type="string"></slot>
<slot name="SemanticType" type="string">Sign or Symptom</slot>
```



<slot name="BodyLocations" type="string">LOWER BACK</slot>  
<slot name="\_score\_BodyLocations" type="string"></slot>  
<slot name="SeverityStrings" type="string"></slot>  
<slot name="UMLS\_CUI" type="string">C0030193</slot>  
<slot name="DaysBeforeDeath" type="int">0</slot>  
<slot name="PAIN" type="string">Y</slot>  
<slot name="MaxPain" type="int">2</slot>  
<slot name="SeverityScale" type="int">1</slot>  
<slot name="\_score\_SeverityScale" type="string"></slot>  
<slot name="polarity" type="string">POSITIVE</slot>  
<slot name="DocType" type="string"></slot>  
<slot name="PatientID" type="int">0</slot>  
<slot name="DateObject" type="record"/>  
<slot name="enddate" type="date">  
<date day="16" month="11" year="2004"/>  
</slot>  
<slot name="\_score\_enddate" type="string"></slot>  
<slot name="startdate" type="date">  
<date day="9" month="11" year="2004"/>  
</slot>  
<slot name="\_score\_startdate" type="string"></slot>  
<slot name="Patient" type="string">PATIENT</slot>  
<slot name="\_score\_Patient" type="string"></slot>  
<slot name="\_keyref" type="record"/>  
<slot name="\_score" type="string"></slot>

```
<slot name="_type" type="string"></slot>
</record>
<record id="5" template="HealthStatusRecord">
<slot name="ScoreType" type="string">HealthStatusRecord</slot>
<slot name="_score_ScoreType" type="string"></slot>
<slot name="source" type="string">C:\i2b2 eval\Subsets\Test\500.txt</slot>
<slot name="_score_source" type="string"></slot>
<slot name="region" type="region">
<region end="321" start="308">Low back pain</region>
</slot>
<slot name="_score_region" type="string"></slot>
<slot name="rule" type="string"></slot>
<slot name="ConceptName" type="string">LOWER BACK PAINS</slot>
<slot name="_score_ConceptName" type="string"></slot>
<slot name="SemanticType" type="string"></slot>
<slot name="BodyLocations" type="string">LOWER BACK</slot>
<slot name="_score_BodyLocations" type="string"></slot>
<slot name="SeverityStrings" type="string"></slot>
<slot name="UMLS_CUI" type="string"></slot>
<slot name="DaysBeforeDeath" type="int">0</slot>
<slot name="PAIN" type="string">Y</slot>
<slot name="MaxPain" type="int">0</slot>
<slot name="SeverityScale" type="int">1</slot>
<slot name="_score_SeverityScale" type="string"></slot>
<slot name="polarity" type="string"></slot>
```

```
<slot name="DocType" type="string"></slot>
<slot name="PatientID" type="int">0</slot>
<slot name="DateObject" type="record"/>
<slot name="enddate" type="date">
<date day="16" month="11" year="2004"/>
</slot>
<slot name="_score_enddate" type="string"></slot>
<slot name="startdate" type="date">
<date day="16" month="11" year="2004"/>
</slot>
<slot name="_score_startdate" type="string"></slot>
<slot name="Patient" type="string"></slot>
<slot name="_score_Patient" type="string"></slot>
<slot name="_keyref" type="record"/>
<slot name="_score" type="string"></slot>
<slot name="_type" type="string"></slot>
</record>
<record id="6" template="HealthStatusRecord">
<slot name="ScoreType" type="string">HealthStatusRecord</slot>
<slot name="_score_ScoreType" type="string">CORRECT</slot>
<slot name="source" type="string">C:\i2b2 eval\Subsets\Test\500.txt</slot>
<slot name="_score_source" type="string">CORRECT</slot>
<slot name="region" type="region">
<region end="321" start="308">Low back pain</region>
</slot>
```

<slot name="\_score\_region" type="string">CORRECT</slot>  
<slot name="rule" type="string">HealthStatusItemPkg/0</slot>  
<slot name="ConceptName" type="string">LOWER BACK PAINS</slot>  
<slot name="\_score\_ConceptName" type="string">CORRECT</slot>  
<slot name="SemanticType" type="string">Sign or Symptom</slot>  
<slot name="BodyLocations" type="string">LOWER BACK</slot>  
<slot name="\_score\_BodyLocations" type="string">CORRECT</slot>  
<slot name="SeverityStrings" type="string"></slot>  
<slot name="UMLS\_CUI" type="string">C0024031</slot>  
<slot name="DaysBeforeDeath" type="int">0</slot>  
<slot name="PAIN" type="string">Y</slot>  
<slot name="MaxPain" type="int">2</slot>  
<slot name="SeverityScale" type="int">1</slot>  
<slot name="\_score\_SeverityScale" type="string">CORRECT</slot>  
<slot name="polarity" type="string">POSITIVE</slot>  
<slot name="DocType" type="string"></slot>  
<slot name="PatientID" type="int">0</slot>  
<slot name="DateObject" type="record"/>  
<slot name="enddate" type="date">  
<date day="16" month="11" year="2004"/>  
</slot>  
<slot name="\_score\_enddate" type="string">CORRECT</slot>  
<slot name="startdate" type="date">  
<date day="16" month="11" year="2004"/>  
</slot>

```
<slot name="_score_startdate" type="string">CORRECT</slot>
<slot name="Patient" type="string">PATIENT</slot>
<slot name="_score_Patient" type="string">SPURIOUS</slot>
<slot name="_keyref" type="record">
<record ref="5"/>
</slot>
<slot name="_score" type="string">INCORRECT</slot>
<slot name="_type" type="string"></slot>
</record>
<record id="7" template="HealthStatusRecord">
<slot name="ScoreType" type="string">HealthStatusRecord</slot>
<slot name="_score_ScoreType" type="string"></slot>
<slot name="source" type="string">C:\i2b2 eval\Subsets\Test\500.txt</slot>
<slot name="_score_source" type="string"></slot>
<slot name="region" type="region">
<region end="321" start="308">Low back pain</region>
</slot>
<slot name="_score_region" type="string"></slot>
<slot name="rule" type="string"></slot>
<slot name="ConceptName" type="string">LOWER BACK PAINS</slot>
<slot name="_score_ConceptName" type="string"></slot>
<slot name="SemanticType" type="string"></slot>
<slot name="BodyLocations" type="string">LOWER BACK</slot>
<slot name="_score_BodyLocations" type="string"></slot>
<slot name="SeverityStrings" type="string"></slot>
```

```
<slot name="UMLS_CUI" type="string"></slot>
<slot name="DaysBeforeDeath" type="int">0</slot>
<slot name="PAIN" type="string">Y</slot>
<slot name="MaxPain" type="int">0</slot>
<slot name="SeverityScale" type="int">1</slot>
<slot name="_score_SeverityScale" type="string"></slot>
<slot name="polarity" type="string"></slot>
<slot name="DocType" type="string"></slot>
<slot name="PatientID" type="int">0</slot>
<slot name="DateObject" type="record"/>
<slot name="enddate" type="date">
<date day="16" month="11" year="2004"/>
</slot>
<slot name="_score_enddate" type="string"></slot>
<slot name="startdate" type="date">
<date day="16" month="11" year="2004"/>
</slot>
<slot name="_score_startdate" type="string"></slot>
<slot name="Patient" type="string"></slot>
<slot name="_score_Patient" type="string"></slot>
<slot name="_keyref" type="record"/>
<slot name="_score" type="string"></slot>
<slot name="_type" type="string"></slot>
</record>
<record id="8" template="HealthStatusRecord">
```

<slot name="ScoreType" type="string">HealthStatusRecord</slot>  
<slot name="\_score\_ScoreType" type="string"></slot>  
<slot name="source" type="string">C:\i2b2 eval\Subsets\Test\500.txt</slot>  
<slot name="\_score\_source" type="string"></slot>  
<slot name="region" type="region">  
<region end="631" start="627">pain</region>  
</slot>  
<slot name="\_score\_region" type="string"></slot>  
<slot name="rule" type="string">HealthStatusItemPkg/0</slot>  
<slot name="ConceptName" type="string">PAIN</slot>  
<slot name="\_score\_ConceptName" type="string"></slot>  
<slot name="SemanticType" type="string">Sign or Symptom</slot>  
<slot name="BodyLocations" type="string">LOWER BACK</slot>  
<slot name="\_score\_BodyLocations" type="string"></slot>  
<slot name="SeverityStrings" type="string"></slot>  
<slot name="UMLS\_CUI" type="string">C0030193</slot>  
<slot name="DaysBeforeDeath" type="int">0</slot>  
<slot name="PAIN" type="string">Y</slot>  
<slot name="MaxPain" type="int">2</slot>  
<slot name="SeverityScale" type="int">1</slot>  
<slot name="\_score\_SeverityScale" type="string"></slot>  
<slot name="polarity" type="string">POSITIVE</slot>  
<slot name="DocType" type="string"></slot>  
<slot name="PatientID" type="int">0</slot>  
<slot name="DateObject" type="record"/>

```
<slot name="enddate" type="date">
<date day="16" month="11" year="2004"/>
</slot>
<slot name="_score_enddate" type="string"></slot>
<slot name="startdate" type="date">
<date day="9" month="11" year="2004"/>
</slot>
<slot name="_score_startdate" type="string"></slot>
<slot name="Patient" type="string">PATIENT</slot>
<slot name="_score_Patient" type="string"></slot>
<slot name="_keyref" type="record"/>
<slot name="_score" type="string"></slot>
<slot name="_type" type="string"></slot>
</record>
<record id="9" template="HealthStatusRecord">
<slot name="ScoreType" type="string">HealthStatusRecord</slot>
<slot name="_score_ScoreType" type="string">CORRECT</slot>
<slot name="source" type="string">C:\i2b2 eval\Subsets\Test\500.txt</slot>
<slot name="_score_source" type="string">CORRECT</slot>
<slot name="region" type="region">
<region end="631" start="627">pain</region>
</slot>
<slot name="_score_region" type="string">CORRECT</slot>
<slot name="rule" type="string">HealthStatusItemPkg/0</slot>
<slot name="ConceptName" type="string">PAIN</slot>
```



<slot name="\_score\_ConceptName" type="string">CORRECT</slot>  
<slot name="SemanticType" type="string">Sign or Symptom</slot>  
<slot name="BodyLocations" type="string"></slot>  
<slot name="\_score\_BodyLocations" type="string">MISSING</slot>  
<slot name="SeverityStrings" type="string"></slot>  
<slot name="UMLS\_CUI" type="string">C0030193</slot>  
<slot name="DaysBeforeDeath" type="int">0</slot>  
<slot name="PAIN" type="string">Y</slot>  
<slot name="MaxPain" type="int">2</slot>  
<slot name="SeverityScale" type="int">1</slot>  
<slot name="\_score\_SeverityScale" type="string">CORRECT</slot>  
<slot name="polarity" type="string">POSITIVE</slot>  
<slot name="DocType" type="string"></slot>  
<slot name="PatientID" type="int">0</slot>  
<slot name="DateObject" type="record"/>  
<slot name="enddate" type="date">  
<date day="16" month="11" year="2004"/>  
</slot>  
<slot name="\_score\_enddate" type="string">CORRECT</slot>  
<slot name="startdate" type="date">  
<date day="16" month="11" year="2004"/>  
</slot>  
<slot name="\_score\_startdate" type="string">INCORRECT</slot>  
<slot name="Patient" type="string">PATIENT</slot>  
<slot name="\_score\_Patient" type="string">CORRECT</slot>

```
<slot name="_keyref" type="record">
<record ref="8"/>
</slot>
<slot name="_score" type="string">INCORRECT</slot>
<slot name="_type" type="string"></slot>
</record>
<record id="10" template="HealthStatusRecord">
<slot name="ScoreType" type="string">HealthStatusRecord</slot>
<slot name="_score_ScoreType" type="string"></slot>
<slot name="source" type="string">C:\i2b2 eval\Subsets\Test\500.txt</slot>
<slot name="_score_source" type="string"></slot>
<slot name="region" type="region">
<region end="784" start="771">shooting pain</region>
</slot>
<slot name="_score_region" type="string"></slot>
<slot name="rule" type="string">HealthStatusItemPkg/0</slot>
<slot name="ConceptName" type="string">PAIN IN LEFT LEG</slot>
<slot name="_score_ConceptName" type="string"></slot>
<slot name="SemanticType" type="string">Sign or Symptom</slot>
<slot name="BodyLocations" type="string">LEFT LEG</slot>
<slot name="_score_BodyLocations" type="string"></slot>
<slot name="SeverityStrings" type="string"></slot>
<slot name="UMLS_CUI" type="string">C0564822</slot>
<slot name="DaysBeforeDeath" type="int">0</slot>
<slot name="PAIN" type="string">Y</slot>
```

```
<slot name="MaxPain" type="int">2</slot>
<slot name="SeverityScale" type="int">1</slot>
<slot name="_score_SeverityScale" type="string"></slot>
<slot name="polarity" type="string">POSITIVE</slot>
<slot name="DocType" type="string"></slot>
<slot name="PatientID" type="int">0</slot>
<slot name="DateObject" type="record"/>
<slot name="enddate" type="date">
<date day="16" month="11" year="2004"/>
</slot>
<slot name="_score_enddate" type="string"></slot>
<slot name="startdate" type="date">
<date day="9" month="11" year="2004"/>
</slot>
<slot name="_score_startdate" type="string"></slot>
<slot name="Patient" type="string">PATIENT</slot>
<slot name="_score_Patient" type="string"></slot>
<slot name="_keyref" type="record"/>
<slot name="_score" type="string"></slot>
<slot name="_type" type="string"></slot>
</record>
<record id="11" template="HealthStatusRecord">
<slot name="ScoreType" type="string">HealthStatusRecord</slot>
<slot name="_score_ScoreType" type="string">CORRECT</slot>
<slot name="source" type="string">C:\i2b2 eval\Subsets\Test\500.txt</slot>
```

<slot name="\_score\_source" type="string">CORRECT</slot>  
<slot name="region" type="region">  
<region end="784" start="771">shooting pain</region>  
</slot>  
<slot name="\_score\_region" type="string">CORRECT</slot>  
<slot name="rule" type="string">HealthStatusItemPkg/0</slot>  
<slot name="ConceptName" type="string">SHOOTING PAIN</slot>  
<slot name="\_score\_ConceptName" type="string">INCORRECT</slot>  
<slot name="SemanticType" type="string">Sign or Symptom</slot>  
<slot name="BodyLocations" type="string">LEFT LEG</slot>  
<slot name="\_score\_BodyLocations" type="string">CORRECT</slot>  
<slot name="SeverityStrings" type="string"></slot>  
<slot name="UMLS\_CUI" type="string">C0278146</slot>  
<slot name="DaysBeforeDeath" type="int">0</slot>  
<slot name="PAIN" type="string">Y</slot>  
<slot name="MaxPain" type="int">2</slot>  
<slot name="SeverityScale" type="int">1</slot>  
<slot name="\_score\_SeverityScale" type="string">CORRECT</slot>  
<slot name="polarity" type="string">POSITIVE</slot>  
<slot name="DocType" type="string"></slot>  
<slot name="PatientID" type="int">0</slot>  
<slot name="DateObject" type="record"/>  
<slot name="enddate" type="date">  
<date day="16" month="11" year="2004"/>  
</slot>

```
<slot name="_score_enddate" type="string">CORRECT</slot>
<slot name="startdate" type="date">
<date day="16" month="11" year="2004"/>
</slot>
<slot name="_score_startdate" type="string">INCORRECT</slot>
<slot name="Patient" type="string">PATIENT</slot>
<slot name="_score_Patient" type="string">CORRECT</slot>
<slot name="_keyref" type="record">
<record ref="10"/>
</slot>
<slot name="_score" type="string">INCORRECT</slot>
<slot name="_type" type="string"></slot>
</record>
<record id="12" template="HealthStatusRecord">
<slot name="ScoreType" type="string">HealthStatusRecord</slot>
<slot name="_score_ScoreType" type="string">SPURIOUS</slot>
<slot name="source" type="string">C:\i2b2 eval\Subsets\Test\500.txt</slot>
<slot name="_score_source" type="string">SPURIOUS</slot>
<slot name="region" type="region">
<region end="918" start="909">back pain</region>
</slot>
<slot name="_score_region" type="string">SPURIOUS</slot>
<slot name="rule" type="string">HealthStatusItemPkg/0</slot>
<slot name="ConceptName" type="string">BACK PAINS</slot>
<slot name="_score_ConceptName" type="string">SPURIOUS</slot>
```

<slot name="SemanticType" type="string">Sign or Symptom</slot>  
<slot name="BodyLocations" type="string">BACK</slot>  
<slot name="\_score\_BodyLocations" type="string">SPURIOUS</slot>  
<slot name="SeverityStrings" type="string"></slot>  
<slot name="UMLS\_CUI" type="string">C0004604</slot>  
<slot name="DaysBeforeDeath" type="int">0</slot>  
<slot name="PAIN" type="string">Y</slot>  
<slot name="MaxPain" type="int">2</slot>  
<slot name="SeverityScale" type="int">1</slot>  
<slot name="\_score\_SeverityScale" type="string">SPURIOUS</slot>  
<slot name="polarity" type="string">POSITIVE</slot>  
<slot name="DocType" type="string"></slot>  
<slot name="PatientID" type="int">0</slot>  
<slot name="DateObject" type="record"/>  
<slot name="enddate" type="date">  
<date day="16" month="11" year="2004"/>  
</slot>  
<slot name="\_score\_enddate" type="string">SPURIOUS</slot>  
<slot name="startdate" type="date">  
<date day="16" month="11" year="2004"/>  
</slot>  
<slot name="\_score\_startdate" type="string">SPURIOUS</slot>  
<slot name="Patient" type="string">PATIENT</slot>  
<slot name="\_score\_Patient" type="string">SPURIOUS</slot>  
<slot name="\_keyref" type="record"/>

```
<slot name="_score" type="string">SPURIOUS</slot>
<slot name="_type" type="string"></slot>
</record>
<record id="13" template="HealthStatusRecord">
<slot name="ScoreType" type="string">HealthStatusRecord</slot>
<slot name="_score_ScoreType" type="string"></slot>
<slot name="source" type="string">C:\i2b2 eval\Subsets\Test\500.txt</slot>
<slot name="_score_source" type="string"></slot>
<slot name="region" type="region">
<region end="2007" start="2003">pain</region>
</slot>
<slot name="_score_region" type="string"></slot>
<slot name="rule" type="string">HealthStatusItemPkg/0</slot>
<slot name="ConceptName" type="string">PAIN</slot>
<slot name="_score_ConceptName" type="string"></slot>
<slot name="SemanticType" type="string">Sign or Symptom</slot>
<slot name="BodyLocations" type="string">LOWER BACK</slot>
<slot name="_score_BodyLocations" type="string"></slot>
<slot name="SeverityStrings" type="string"></slot>
<slot name="UMLS_CUI" type="string">C0030193</slot>
<slot name="DaysBeforeDeath" type="int">0</slot>
<slot name="PAIN" type="string">Y</slot>
<slot name="MaxPain" type="int">2</slot>
<slot name="SeverityScale" type="int">1</slot>
<slot name="_score_SeverityScale" type="string"></slot>
```

```
<slot name="polarity" type="string">POSITIVE</slot>
<slot name="DocType" type="string"></slot>
<slot name="PatientID" type="int">0</slot>
<slot name="DateObject" type="record"/>
<slot name="enddate" type="date">
<date day="16" month="11" year="2004"/>
</slot>
<slot name="_score_enddate" type="string"></slot>
<slot name="startdate" type="date">
<date day="16" month="11" year="2004"/>
</slot>
<slot name="_score_startdate" type="string"></slot>
<slot name="Patient" type="string">PATIENT</slot>
<slot name="_score_Patient" type="string"></slot>
<slot name="_keyref" type="record"/>
<slot name="_score" type="string"></slot>
<slot name="_type" type="string"></slot>
</record>
<record id="14" template="HealthStatusRecord">
<slot name="ScoreType" type="string">HealthStatusRecord</slot>
<slot name="_score_ScoreType" type="string">CORRECT</slot>
<slot name="source" type="string">C:\i2b2 eval\Subsets\Test\500.txt</slot>
<slot name="_score_source" type="string">CORRECT</slot>
<slot name="region" type="region">
<region end="2007" start="2003">pain</region>
```



</slot>  
<slot name="\_score\_region" type="string">CORRECT</slot>  
<slot name="rule" type="string">HealthStatusItemPkg/0</slot>  
<slot name="ConceptName" type="string">PAIN</slot>  
<slot name="\_score\_ConceptName" type="string">CORRECT</slot>  
<slot name="SemanticType" type="string">Sign or Symptom</slot>  
<slot name="BodyLocations" type="string"></slot>  
<slot name="\_score\_BodyLocations" type="string">MISSING</slot>  
<slot name="SeverityStrings" type="string"></slot>  
<slot name="UMLS\_CUI" type="string">C0030193</slot>  
<slot name="DaysBeforeDeath" type="int">0</slot>  
<slot name="PAIN" type="string">Y</slot>  
<slot name="MaxPain" type="int">2</slot>  
<slot name="SeverityScale" type="int">1</slot>  
<slot name="\_score\_SeverityScale" type="string">CORRECT</slot>  
<slot name="polarity" type="string">POSITIVE</slot>  
<slot name="DocType" type="string"></slot>  
<slot name="PatientID" type="int">0</slot>  
<slot name="DateObject" type="record"/>  
<slot name="enddate" type="date">  
<date day="16" month="11" year="2004"/>  
</slot>  
<slot name="\_score\_enddate" type="string">CORRECT</slot>  
<slot name="startdate" type="date">  
<date day="16" month="11" year="2004"/>

```
</slot>
<slot name="_score_startdate" type="string">CORRECT</slot>
<slot name="Patient" type="string">PATIENT</slot>
<slot name="_score_Patient" type="string">CORRECT</slot>
<slot name="_keyref" type="record">
<record ref="13"/>
</slot>
<slot name="_score" type="string">INCORRECT</slot>
<slot name="_type" type="string"></slot>
</record>
<record id="15" template="HealthStatusRecord">
<slot name="ScoreType" type="string">HealthStatusRecord</slot>
<slot name="_score_ScoreType" type="string"></slot>
<slot name="source" type="string">C:\i2b2 eval\Subsets\Test\500.txt</slot>
<slot name="_score_source" type="string"></slot>
<slot name="region" type="region">
<region end="2091" start="2087">pain</region>
</slot>
<slot name="_score_region" type="string"></slot>
<slot name="rule" type="string">HealthStatusItemPkg/0</slot>
<slot name="ConceptName" type="string">PAIN</slot>
<slot name="_score_ConceptName" type="string"></slot>
<slot name="SemanticType" type="string">Sign or Symptom</slot>
<slot name="BodyLocations" type="string">LOWER BACK</slot>
<slot name="_score_BodyLocations" type="string"></slot>
```

```
<slot name="SeverityStrings" type="string">MANAGED</slot>
<slot name="UMLS_CUI" type="string">C0030193</slot>
<slot name="DaysBeforeDeath" type="int">0</slot>
<slot name="PAIN" type="string">Y</slot>
<slot name="MaxPain" type="int">2</slot>
<slot name="SeverityScale" type="int">2</slot>
<slot name="_score_SeverityScale" type="string"></slot>
<slot name="polarity" type="string">POSITIVE</slot>
<slot name="DocType" type="string"></slot>
<slot name="PatientID" type="int">0</slot>
<slot name="DateObject" type="record"/>
<slot name="enddate" type="date">
<date day="18" month="11" year="2004"/>
</slot>
<slot name="_score_enddate" type="string"></slot>
<slot name="startdate" type="date">
<date day="16" month="11" year="2004"/>
</slot>
<slot name="_score_startdate" type="string"></slot>
<slot name="Patient" type="string">PATIENT</slot>
<slot name="_score_Patient" type="string"></slot>
<slot name="_keyref" type="record"/>
<slot name="_score" type="string"></slot>
<slot name="_type" type="string"></slot>
</record>
```

```
<record id="16" template="HealthStatusRecord">
  <slot name="ScoreType" type="string">HealthStatusRecord</slot>
  <slot name="_score_ScoreType" type="string">CORRECT</slot>
  <slot name="source" type="string">C:\i2b2 eval\Subsets\Test\500.txt</slot>
  <slot name="_score_source" type="string">CORRECT</slot>
  <slot name="region" type="region">
    <region end="2091" start="2087">pain</region>
  </slot>
  <slot name="_score_region" type="string">CORRECT</slot>
  <slot name="rule" type="string">HealthStatusItemPkg/0</slot>
  <slot name="ConceptName" type="string">PAIN</slot>
  <slot name="_score_ConceptName" type="string">CORRECT</slot>
  <slot name="SemanticType" type="string">Sign or Symptom</slot>
  <slot name="BodyLocations" type="string"></slot>
  <slot name="_score_BodyLocations" type="string">MISSING</slot>
  <slot name="SeverityStrings" type="string">MANAGED</slot>
  <slot name="UMLS_CUI" type="string">C0030193</slot>
  <slot name="DaysBeforeDeath" type="int">0</slot>
  <slot name="PAIN" type="string">Y</slot>
  <slot name="MaxPain" type="int">2</slot>
  <slot name="SeverityScale" type="int">2</slot>
  <slot name="_score_SeverityScale" type="string">CORRECT</slot>
  <slot name="polarity" type="string">POSITIVE</slot>
  <slot name="DocType" type="string"></slot>
  <slot name="PatientID" type="int">0</slot>
```

```
<slot name="DateObject" type="record"/>
<slot name="enddate" type="date">
<date day="16" month="11" year="2004"/>
</slot>
<slot name="_score_enddate" type="string">INCORRECT</slot>
<slot name="startdate" type="date">
<date day="16" month="11" year="2004"/>
</slot>
<slot name="_score_startdate" type="string">CORRECT</slot>
<slot name="Patient" type="string">PATIENT</slot>
<slot name="_score_Patient" type="string">CORRECT</slot>
<slot name="_keyref" type="record">
<record ref="15"/>
</slot>
<slot name="_score" type="string">INCORRECT</slot>
<slot name="_type" type="string"></slot>
</record>
<record id="17" template="HealthStatusRecord">
<slot name="ScoreType" type="string">HealthStatusRecord</slot>
<slot name="_score_ScoreType" type="string"></slot>
<slot name="source" type="string">C:\i2b2 eval\Subsets\Test\500.txt</slot>
<slot name="_score_source" type="string"></slot>
<slot name="region" type="region">
<region end="2007" start="2003">pain</region>
</slot>
```

<slot name="\_score\_region" type="string"></slot>  
<slot name="rule" type="string">HealthStatusItemPkg/0</slot>  
<slot name="ConceptName" type="string">PAIN</slot>  
<slot name="\_score\_ConceptName" type="string"></slot>  
<slot name="SemanticType" type="string">Sign or Symptom</slot>  
<slot name="BodyLocations" type="string">LOWER BACK</slot>  
<slot name="\_score\_BodyLocations" type="string"></slot>  
<slot name="SeverityStrings" type="string"></slot>  
<slot name="UMLS\_CUI" type="string">C0030193</slot>  
<slot name="DaysBeforeDeath" type="int">0</slot>  
<slot name="PAIN" type="string">Y</slot>  
<slot name="MaxPain" type="int">2</slot>  
<slot name="SeverityScale" type="int">1</slot>  
<slot name="\_score\_SeverityScale" type="string"></slot>  
<slot name="polarity" type="string">POSITIVE</slot>  
<slot name="DocType" type="string"></slot>  
<slot name="PatientID" type="int">0</slot>  
<slot name="DateObject" type="record"/>  
<slot name="enddate" type="date">  
<date day="16" month="11" year="2004"/>  
</slot>  
<slot name="\_score\_enddate" type="string"></slot>  
<slot name="startdate" type="date">  
<date day="16" month="11" year="2004"/>  
</slot>

```
<slot name="_score_startdate" type="string"></slot>
<slot name="Patient" type="string">PATIENT</slot>
<slot name="_score_Patient" type="string"></slot>
<slot name="_keyref" type="record"/>
<slot name="_score" type="string"></slot>
<slot name="_type" type="string"></slot>
</record>
<record id="18" template="HealthStatusRecord">
<slot name="ScoreType" type="string">HealthStatusRecord</slot>
<slot name="_score_ScoreType" type="string"></slot>
<slot name="source" type="string">C:\i2b2 eval\Subsets\Test\500.txt</slot>
<slot name="_score_source" type="string"></slot>
<slot name="region" type="region">
<region end="507" start="494">low back pain</region>
</slot>
<slot name="_score_region" type="string"></slot>
<slot name="rule" type="string">HealthStatusItemPkg/0</slot>
<slot name="ConceptName" type="string">LOWER BACK PAINS</slot>
<slot name="_score_ConceptName" type="string"></slot>
<slot name="SemanticType" type="string">Sign or Symptom</slot>
<slot name="BodyLocations" type="string">LOWER BACK</slot>
<slot name="_score_BodyLocations" type="string"></slot>
<slot name="SeverityStrings" type="string"></slot>
<slot name="UMLS_CUI" type="string">C0024031</slot>
<slot name="DaysBeforeDeath" type="int">0</slot>
```

```
<slot name="PAIN" type="string">Y</slot>
<slot name="MaxPain" type="int">2</slot>
<slot name="SeverityScale" type="int">1</slot>
<slot name="_score_SeverityScale" type="string"></slot>
<slot name="polarity" type="string">POSITIVE</slot>
<slot name="DocType" type="string"></slot>
<slot name="PatientID" type="int">0</slot>
<slot name="DateObject" type="record"/>
<slot name="enddate" type="date">
<date day="16" month="11" year="2004"/>
</slot>
<slot name="_score_enddate" type="string"></slot>
<slot name="startdate" type="date">
<date day="9" month="11" year="2004"/>
</slot>
<slot name="_score_startdate" type="string"></slot>
<slot name="Patient" type="string">PATIENT</slot>
<slot name="_score_Patient" type="string"></slot>
<slot name="_keyref" type="record"/>
<slot name="_score" type="string"></slot>
<slot name="_type" type="string"></slot>
</record>
<record id="19" template="HealthStatusRecord">
<slot name="ScoreType" type="string">HealthStatusRecord</slot>
<slot name="_score_ScoreType" type="string">CORRECT</slot>
```



<slot name="source" type="string">C:\i2b2 eval\Subsets\Test\500.txt</slot>  
<slot name="\_score\_source" type="string">CORRECT</slot>  
<slot name="region" type="region">  
<region end="507" start="494">low back pain</region>  
</slot>  
<slot name="\_score\_region" type="string">CORRECT</slot>  
<slot name="rule" type="string">HealthStatusItemPkg/0</slot>  
<slot name="ConceptName" type="string">LOWER BACK PAINS</slot>  
<slot name="\_score\_ConceptName" type="string">CORRECT</slot>  
<slot name="SemanticType" type="string">Sign or Symptom</slot>  
<slot name="BodyLocations" type="string">LOWER BACK</slot>  
<slot name="\_score\_BodyLocations" type="string">CORRECT</slot>  
<slot name="SeverityStrings" type="string"></slot>  
<slot name="UMLS\_CUI" type="string">C0024031</slot>  
<slot name="DaysBeforeDeath" type="int">0</slot>  
<slot name="PAIN" type="string">Y</slot>  
<slot name="MaxPain" type="int">2</slot>  
<slot name="SeverityScale" type="int">1</slot>  
<slot name="\_score\_SeverityScale" type="string">CORRECT</slot>  
<slot name="polarity" type="string">POSITIVE</slot>  
<slot name="DocType" type="string"></slot>  
<slot name="PatientID" type="int">0</slot>  
<slot name="DateObject" type="record"/>  
<slot name="enddate" type="date">  
<date day="16" month="11" year="2004"/>

```
</slot>
<slot name="_score_enddate" type="string">CORRECT</slot>
<slot name="startdate" type="date">
<date day="16" month="11" year="2004"/>
</slot>
<slot name="_score_startdate" type="string">INCORRECT</slot>
<slot name="Patient" type="string">PATIENT</slot>
<slot name="_score_Patient" type="string">CORRECT</slot>
<slot name="_keyref" type="record">
<record ref="18"/>
</slot>
<slot name="_score" type="string">INCORRECT</slot>
<slot name="_type" type="string"></slot>
</record>
<record id="20" template="HealthStatusRecord">
<slot name="ScoreType" type="string">HealthStatusRecord</slot>
<slot name="_score_ScoreType" type="string">MISSING</slot>
<slot name="source" type="string">C:\i2b2 eval\Subsets\Test\500.txt</slot>
<slot name="_score_source" type="string">MISSING</slot>
<slot name="region" type="region">
<region end="2421" start="2417">pain</region>
</slot>
<slot name="_score_region" type="string">MISSING</slot>
<slot name="rule" type="string"></slot>
<slot name="ConceptName" type="string">PAIN</slot>
```

<slot name="\_score\_ConceptName" type="string">MISSING</slot>  
<slot name="SemanticType" type="string"></slot>  
<slot name="BodyLocations" type="string">LOWER BACK</slot>  
<slot name="\_score\_BodyLocations" type="string">MISSING</slot>  
<slot name="SeverityStrings" type="string"></slot>  
<slot name="UMLS\_CUI" type="string"></slot>  
<slot name="DaysBeforeDeath" type="int">0</slot>  
<slot name="PAIN" type="string">Y</slot>  
<slot name="MaxPain" type="int">0</slot>  
<slot name="SeverityScale" type="int">2</slot>  
<slot name="\_score\_SeverityScale" type="string">MISSING</slot>  
<slot name="polarity" type="string"></slot>  
<slot name="DocType" type="string"></slot>  
<slot name="PatientID" type="int">0</slot>  
<slot name="DateObject" type="record"/>  
<slot name="enddate" type="date">  
<date day="18" month="11" year="2004"/>  
</slot>  
<slot name="\_score\_enddate" type="string">MISSING</slot>  
<slot name="startdate" type="date">  
<date day="18" month="11" year="2004"/>  
</slot>  
<slot name="\_score\_startdate" type="string">MISSING</slot>  
<slot name="Patient" type="string"></slot>  
<slot name="\_score\_Patient" type="string"></slot>

```
<slot name="_keyref" type="record"/>
<slot name="_score" type="string">MISSING</slot>
<slot name="_type" type="string"></slot>
</record>
</records>
</infStore>
<?xml version="1.0" encoding="UTF-8"?>
<infStore>
<records>
<record id="0" template="HealthStatusRecord">
<slot name="ScoreType" type="string">HealthStatusRecord</slot>
<slot name="_score_ScoreType" type="string">MISSING</slot>
<slot name="source" type="string">C:\i2b2 eval\Subsets\Test\55.txt</slot>
<slot name="_score_source" type="string">MISSING</slot>
<slot name="region" type="region">
<region end="3850" start="3846">pain</region>
</slot>
<slot name="_score_region" type="string">MISSING</slot>
<slot name="rule" type="string"></slot>
<slot name="ConceptName" type="string">PAIN</slot>
<slot name="_score_ConceptName" type="string">MISSING</slot>
<slot name="SemanticType" type="string"></slot>
<slot name="BodyLocations" type="string">ABDOMEN</slot>
<slot name="_score_BodyLocations" type="string">MISSING</slot>
<slot name="SeverityStrings" type="string"></slot>
```

```
<slot name="UMLS_CUI" type="string"></slot>
<slot name="DaysBeforeDeath" type="int">0</slot>
<slot name="PAIN" type="string">Y</slot>
<slot name="MaxPain" type="int">0</slot>
<slot name="SeverityScale" type="int">2</slot>
<slot name="_score_SeverityScale" type="string">MISSING</slot>
<slot name="polarity" type="string"></slot>
<slot name="DocType" type="string"></slot>
<slot name="PatientID" type="int">0</slot>
<slot name="DateObject" type="record"/>
<slot name="enddate" type="date">
<date day="8" month="6" year="2004"/>
</slot>
<slot name="_score_enddate" type="string">MISSING</slot>
<slot name="startdate" type="date">
<date day="4" month="6" year="2004"/>
</slot>
<slot name="_score_startdate" type="string">MISSING</slot>
<slot name="Patient" type="string"></slot>
<slot name="_score_Patient" type="string"></slot>
<slot name="_keyref" type="record"/>
<slot name="_score" type="string">MISSING</slot>
<slot name="_type" type="string"></slot>
</record>
<record id="1" template="HealthStatusRecord">
```

<slot name="ScoreType" type="string">HealthStatusRecord</slot>  
<slot name="\_score\_ScoreType" type="string"></slot>  
<slot name="source" type="string">C:\i2b2 eval\Subsets\Test\55.txt</slot>  
<slot name="\_score\_source" type="string"></slot>  
<slot name="region" type="region">  
<region end="3225" start="3221">pain</region>  
</slot>  
<slot name="\_score\_region" type="string"></slot>  
<slot name="rule" type="string">HealthStatusItemPkg/0</slot>  
<slot name="ConceptName" type="string">ABDOMINAL PAIN</slot>  
<slot name="\_score\_ConceptName" type="string"></slot>  
<slot name="SemanticType" type="string">Sign or Symptom</slot>  
<slot name="BodyLocations" type="string">ABDOMEN</slot>  
<slot name="\_score\_BodyLocations" type="string"></slot>  
<slot name="SeverityStrings" type="string"></slot>  
<slot name="UMLS\_CUI" type="string">C0000737</slot>  
<slot name="DaysBeforeDeath" type="int">0</slot>  
<slot name="PAIN" type="string">Y</slot>  
<slot name="MaxPain" type="int">1</slot>  
<slot name="SeverityScale" type="int">1</slot>  
<slot name="\_score\_SeverityScale" type="string"></slot>  
<slot name="polarity" type="string">POSITIVE</slot>  
<slot name="DocType" type="string"></slot>  
<slot name="PatientID" type="int">0</slot>  
<slot name="DateObject" type="record"/>

```
<slot name="enddate" type="date">
<date day="8" month="6" year="2004"/>
</slot>
<slot name="_score_enddate" type="string"></slot>
<slot name="startdate" type="date">
<date day="30" month="5" year="2004"/>
</slot>
<slot name="_score_startdate" type="string"></slot>
<slot name="Patient" type="string">PATIENT</slot>
<slot name="_score_Patient" type="string"></slot>
<slot name="_keyref" type="record"/>
<slot name="_score" type="string"></slot>
<slot name="_type" type="string"></slot>
</record>
<record id="2" template="HealthStatusRecord">
<slot name="ScoreType" type="string">HealthStatusRecord</slot>
<slot name="_score_ScoreType" type="string"></slot>
<slot name="source" type="string">C:\i2b2 eval\Subsets\Test\55.txt</slot>
<slot name="_score_source" type="string"></slot>
<slot name="region" type="region">
<region end="3639" start="3635">pain</region>
</slot>
<slot name="_score_region" type="string"></slot>
<slot name="rule" type="string">HealthStatusItemPkg/0</slot>
<slot name="ConceptName" type="string">ABDOMINAL PAIN</slot>
```

<slot name="\_score\_ConceptName" type="string"></slot>  
<slot name="SemanticType" type="string">Sign or Symptom</slot>  
<slot name="BodyLocations" type="string">ABDOMEN</slot>  
<slot name="\_score\_BodyLocations" type="string"></slot>  
<slot name="SeverityStrings" type="string"></slot>  
<slot name="UMLS\_CUI" type="string">C0000737</slot>  
<slot name="DaysBeforeDeath" type="int">0</slot>  
<slot name="PAIN" type="string">Y</slot>  
<slot name="MaxPain" type="int">1</slot>  
<slot name="SeverityScale" type="int">1</slot>  
<slot name="\_score\_SeverityScale" type="string"></slot>  
<slot name="polarity" type="string">POSITIVE</slot>  
<slot name="DocType" type="string"></slot>  
<slot name="PatientID" type="int">0</slot>  
<slot name="DateObject" type="record"/>  
<slot name="enddate" type="date">  
<date day="8" month="6" year="2004"/>  
</slot>  
<slot name="\_score\_enddate" type="string"></slot>  
<slot name="startdate" type="date">  
<date day="1" month="6" year="2004"/>  
</slot>  
<slot name="\_score\_startdate" type="string"></slot>  
<slot name="Patient" type="string">PATIENT</slot>  
<slot name="\_score\_Patient" type="string"></slot>



```
<slot name="_keyref" type="record"/>
<slot name="_score" type="string"></slot>
<slot name="_type" type="string"></slot>
</record>
<record id="3" template="HealthStatusRecord">
<slot name="ScoreType" type="string">HealthStatusRecord</slot>
<slot name="_score_ScoreType" type="string"></slot>
<slot name="source" type="string">C:\i2b2 eval\Subsets\Test\55.txt</slot>
<slot name="_score_source" type="string"></slot>
<slot name="region" type="region">
<region end="3010" start="3006">pain</region>
</slot>
<slot name="_score_region" type="string"></slot>
<slot name="rule" type="string">HealthStatusItemPkg/0</slot>
<slot name="ConceptName" type="string">ABDOMINAL PAIN</slot>
<slot name="_score_ConceptName" type="string"></slot>
<slot name="SemanticType" type="string">Sign or Symptom</slot>
<slot name="BodyLocations" type="string">ABDOMEN</slot>
<slot name="_score_BodyLocations" type="string"></slot>
<slot name="SeverityStrings" type="string"></slot>
<slot name="UMLS_CUI" type="string">C0000737</slot>
<slot name="DaysBeforeDeath" type="int">0</slot>
<slot name="PAIN" type="string">Y</slot>
<slot name="MaxPain" type="int">1</slot>
<slot name="SeverityScale" type="int">1</slot>
```

```
<slot name="_score_SeverityScale" type="string"></slot>
<slot name="polarity" type="string">POSITIVE</slot>
<slot name="DocType" type="string"></slot>
<slot name="PatientID" type="int">0</slot>
<slot name="DateObject" type="record"/>
<slot name="enddate" type="date">
<date day="8" month="6" year="2004"/>
</slot>
<slot name="_score_enddate" type="string"></slot>
<slot name="startdate" type="date">
<date day="4" month="6" year="2004"/>
</slot>
<slot name="_score_startdate" type="string"></slot>
<slot name="Patient" type="string">PATIENT</slot>
<slot name="_score_Patient" type="string"></slot>
<slot name="_keyref" type="record"/>
<slot name="_score" type="string"></slot>
<slot name="_type" type="string"></slot>
</record>
<record id="4" template="HealthStatusRecord">
<slot name="ScoreType" type="string">HealthStatusRecord</slot>
<slot name="_score_ScoreType" type="string">CORRECT</slot>
<slot name="source" type="string">C:\i2b2 eval\Subsets\Test\55.txt</slot>
<slot name="_score_source" type="string">CORRECT</slot>
<slot name="region" type="region">
```

<region end="3010" start="3006">pain</region>  
</slot>  
<slot name="\_score\_region" type="string">CORRECT</slot>  
<slot name="rule" type="string">HealthStatusItemPkg/0</slot>  
<slot name="ConceptName" type="string">PAIN</slot>  
<slot name="\_score\_ConceptName" type="string">INCORRECT</slot>  
<slot name="SemanticType" type="string">Sign or Symptom</slot>  
<slot name="BodyLocations" type="string">ABDOMEN</slot>  
<slot name="\_score\_BodyLocations" type="string">CORRECT</slot>  
<slot name="SeverityStrings" type="string"></slot>  
<slot name="UMLS\_CUI" type="string">C0030193</slot>  
<slot name="DaysBeforeDeath" type="int">0</slot>  
<slot name="PAIN" type="string">Y</slot>  
<slot name="MaxPain" type="int">1</slot>  
<slot name="SeverityScale" type="int">1</slot>  
<slot name="\_score\_SeverityScale" type="string">CORRECT</slot>  
<slot name="polarity" type="string">POSITIVE</slot>  
<slot name="DocType" type="string"></slot>  
<slot name="PatientID" type="int">0</slot>  
<slot name="DateObject" type="record"/>  
<slot name="enddate" type="date">  
<date day="4" month="6" year="2004"/>  
</slot>  
<slot name="\_score\_enddate" type="string">INCORRECT</slot>  
<slot name="startdate" type="date">

```
<date day="4" month="6" year="2004"/>
</slot>
<slot name="_score_startdate" type="string">CORRECT</slot>
<slot name="Patient" type="string">PATIENT</slot>
<slot name="_score_Patient" type="string">CORRECT</slot>
<slot name="_keyref" type="record">
<record ref="3"/>
</slot>
<slot name="_score" type="string">INCORRECT</slot>
<slot name="_type" type="string"></slot>
</record>
<record id="5" template="HealthStatusRecord">
<slot name="ScoreType" type="string">HealthStatusRecord</slot>
<slot name="_score_ScoreType" type="string"></slot>
<slot name="source" type="string">C:\i2b2 eval\Subsets\Test\55.txt</slot>
<slot name="_score_source" type="string"></slot>
<slot name="region" type="region">
<region end="3225" start="3221">pain</region>
</slot>
<slot name="_score_region" type="string"></slot>
<slot name="rule" type="string">HealthStatusItemPkg/0</slot>
<slot name="ConceptName" type="string">ABDOMINAL PAIN</slot>
<slot name="_score_ConceptName" type="string"></slot>
<slot name="SemanticType" type="string">Sign or Symptom</slot>
<slot name="BodyLocations" type="string">ABDOMEN</slot>
```

<slot name="\_score\_BodyLocations" type="string"></slot>  
<slot name="SeverityStrings" type="string"></slot>  
<slot name="UMLS\_CUI" type="string">C0000737</slot>  
<slot name="DaysBeforeDeath" type="int">0</slot>  
<slot name="PAIN" type="string">Y</slot>  
<slot name="MaxPain" type="int">1</slot>  
<slot name="SeverityScale" type="int">1</slot>  
<slot name="\_score\_SeverityScale" type="string"></slot>  
<slot name="polarity" type="string">POSITIVE</slot>  
<slot name="DocType" type="string"></slot>  
<slot name="PatientID" type="int">0</slot>  
<slot name="DateObject" type="record"/>  
<slot name="enddate" type="date">  
<date day="8" month="6" year="2004"/>  
</slot>  
<slot name="\_score\_enddate" type="string"></slot>  
<slot name="startdate" type="date">  
<date day="30" month="5" year="2004"/>  
</slot>  
<slot name="\_score\_startdate" type="string"></slot>  
<slot name="Patient" type="string">PATIENT</slot>  
<slot name="\_score\_Patient" type="string"></slot>  
<slot name="\_keyref" type="record"/>  
<slot name="\_score" type="string"></slot>  
<slot name="\_type" type="string"></slot>

```
</record>
<record id="6" template="HealthStatusRecord">
  <slot name="ScoreType" type="string">HealthStatusRecord</slot>
  <slot name="_score_ScoreType" type="string">CORRECT</slot>
  <slot name="source" type="string">C:\i2b2 eval\Subsets\Test\55.txt</slot>
  <slot name="_score_source" type="string">CORRECT</slot>
  <slot name="region" type="region">
    <region end="3225" start="3221">pain</region>
  </slot>
  <slot name="_score_region" type="string">CORRECT</slot>
  <slot name="rule" type="string">HealthStatusItemPkg/0</slot>
  <slot name="ConceptName" type="string">PAIN</slot>
  <slot name="_score_ConceptName" type="string">INCORRECT</slot>
  <slot name="SemanticType" type="string">Sign or Symptom</slot>
  <slot name="BodyLocations" type="string">ABDOMEN</slot>
  <slot name="_score_BodyLocations" type="string">CORRECT</slot>
  <slot name="SeverityStrings" type="string"></slot>
  <slot name="UMLS_CUI" type="string">C0030193</slot>
  <slot name="DaysBeforeDeath" type="int">0</slot>
  <slot name="PAIN" type="string">Y</slot>
  <slot name="MaxPain" type="int">1</slot>
  <slot name="SeverityScale" type="int">1</slot>
  <slot name="_score_SeverityScale" type="string">CORRECT</slot>
  <slot name="polarity" type="string">POSITIVE</slot>
  <slot name="DocType" type="string"></slot>
```

```
<slot name="PatientID" type="int">0</slot>
<slot name="DateObject" type="record"/>
<slot name="enddate" type="date">
<date day="4" month="6" year="2004"/>
</slot>
<slot name="_score_enddate" type="string">INCORRECT</slot>
<slot name="startdate" type="date">
<date day="4" month="6" year="2004"/>
</slot>
<slot name="_score_startdate" type="string">INCORRECT</slot>
<slot name="Patient" type="string">PATIENT</slot>
<slot name="_score_Patient" type="string">CORRECT</slot>
<slot name="_keyref" type="record">
<record ref="5"/>
</slot>
<slot name="_score" type="string">INCORRECT</slot>
<slot name="_type" type="string"></slot>
</record>
<record id="7" template="HealthStatusRecord">
<slot name="ScoreType" type="string">HealthStatusRecord</slot>
<slot name="_score_ScoreType" type="string"></slot>
<slot name="source" type="string">C:\i2b2 eval\Subsets\Test\55.txt</slot>
<slot name="_score_source" type="string"></slot>
<slot name="region" type="region">
<region end="3639" start="3635">pain</region>
```

</slot>  
<slot name="\_score\_region" type="string"></slot>  
<slot name="rule" type="string">HealthStatusItemPkg/0</slot>  
<slot name="ConceptName" type="string">ABDOMINAL PAIN</slot>  
<slot name="\_score\_ConceptName" type="string"></slot>  
<slot name="SemanticType" type="string">Sign or Symptom</slot>  
<slot name="BodyLocations" type="string">ABDOMEN</slot>  
<slot name="\_score\_BodyLocations" type="string"></slot>  
<slot name="SeverityStrings" type="string"></slot>  
<slot name="UMLS\_CUI" type="string">C0000737</slot>  
<slot name="DaysBeforeDeath" type="int">0</slot>  
<slot name="PAIN" type="string">Y</slot>  
<slot name="MaxPain" type="int">1</slot>  
<slot name="SeverityScale" type="int">1</slot>  
<slot name="\_score\_SeverityScale" type="string"></slot>  
<slot name="polarity" type="string">POSITIVE</slot>  
<slot name="DocType" type="string"></slot>  
<slot name="PatientID" type="int">0</slot>  
<slot name="DateObject" type="record"/>  
<slot name="enddate" type="date">  
<date day="8" month="6" year="2004"/>  
</slot>  
<slot name="\_score\_enddate" type="string"></slot>  
<slot name="startdate" type="date">  
<date day="1" month="6" year="2004"/>



```
</slot>
<slot name="_score_startdate" type="string"></slot>
<slot name="Patient" type="string">PATIENT</slot>
<slot name="_score_Patient" type="string"></slot>
<slot name="_keyref" type="record"/>
<slot name="_score" type="string"></slot>
<slot name="_type" type="string"></slot>
</record>
<record id="8" template="HealthStatusRecord">
<slot name="ScoreType" type="string">HealthStatusRecord</slot>
<slot name="_score_ScoreType" type="string">CORRECT</slot>
<slot name="source" type="string">C:\i2b2 eval\Subsets\Test\55.txt</slot>
<slot name="_score_source" type="string">CORRECT</slot>
<slot name="region" type="region">
<region end="3639" start="3635">pain</region>
</slot>
<slot name="_score_region" type="string">CORRECT</slot>
<slot name="rule" type="string">HealthStatusItemPkg/0</slot>
<slot name="ConceptName" type="string">PAIN</slot>
<slot name="_score_ConceptName" type="string">INCORRECT</slot>
<slot name="SemanticType" type="string">Sign or Symptom</slot>
<slot name="BodyLocations" type="string">ABDOMEN</slot>
<slot name="_score_BodyLocations" type="string">CORRECT</slot>
<slot name="SeverityStrings" type="string"></slot>
<slot name="UMLS_CUI" type="string">C0030193</slot>
```

```
<slot name="DaysBeforeDeath" type="int">0</slot>
<slot name="PAIN" type="string">Y</slot>
<slot name="MaxPain" type="int">1</slot>
<slot name="SeverityScale" type="int">1</slot>
<slot name="_score_SeverityScale" type="string">CORRECT</slot>
<slot name="polarity" type="string">POSITIVE</slot>
<slot name="DocType" type="string"></slot>
<slot name="PatientID" type="int">0</slot>
<slot name="DateObject" type="record"/>
<slot name="enddate" type="date">
<date day="4" month="6" year="2004"/>
</slot>
<slot name="_score_enddate" type="string">INCORRECT</slot>
<slot name="startdate" type="date">
<date day="4" month="6" year="2004"/>
</slot>
<slot name="_score_startdate" type="string">INCORRECT</slot>
<slot name="Patient" type="string">PATIENT</slot>
<slot name="_score_Patient" type="string">CORRECT</slot>
<slot name="_keyref" type="record">
<record ref="7"/>
</slot>
<slot name="_score" type="string">INCORRECT</slot>
<slot name="_type" type="string"></slot>
</record>
```

```
<record id="9" template="HealthStatusRecord">
  <slot name="ScoreType" type="string">HealthStatusRecord</slot>
  <slot name="_score_ScoreType" type="string"></slot>
  <slot name="source" type="string">C:\i2b2 eval\Subsets\Test\55.txt</slot>
  <slot name="_score_source" type="string"></slot>
  <slot name="region" type="region">
    <region end="3010" start="3006">pain</region>
  </slot>
  <slot name="_score_region" type="string"></slot>
  <slot name="rule" type="string">HealthStatusItemPkg/0</slot>
  <slot name="ConceptName" type="string">ABDOMINAL PAIN</slot>
  <slot name="_score_ConceptName" type="string"></slot>
  <slot name="SemanticType" type="string">Sign or Symptom</slot>
  <slot name="BodyLocations" type="string">ABDOMEN</slot>
  <slot name="_score_BodyLocations" type="string"></slot>
  <slot name="SeverityStrings" type="string"></slot>
  <slot name="UMLS_CUI" type="string">C0000737</slot>
  <slot name="DaysBeforeDeath" type="int">0</slot>
  <slot name="PAIN" type="string">Y</slot>
  <slot name="MaxPain" type="int">1</slot>
  <slot name="SeverityScale" type="int">1</slot>
  <slot name="_score_SeverityScale" type="string"></slot>
  <slot name="polarity" type="string">POSITIVE</slot>
  <slot name="DocType" type="string"></slot>
  <slot name="PatientID" type="int">0</slot>
```

```
<slot name="DateObject" type="record"/>
<slot name="enddate" type="date">
<date day="8" month="6" year="2004"/>
</slot>
<slot name="_score_enddate" type="string"></slot>
<slot name="startdate" type="date">
<date day="4" month="6" year="2004"/>
</slot>
<slot name="_score_startdate" type="string"></slot>
<slot name="Patient" type="string">PATIENT</slot>
<slot name="_score_Patient" type="string"></slot>
<slot name="_keyref" type="record"/>
<slot name="_score" type="string"></slot>
<slot name="_type" type="string"></slot>
</record>
</records>
</infStore>
<?xml version="1.0" encoding="UTF-8"?>
<infStore>
<records>
<record id="0" template="HealthStatusRecord">
<slot name="ScoreType" type="string">HealthStatusRecord</slot>
<slot name="_score_ScoreType" type="string"></slot>
<slot name="source" type="string">C:\i2b2 eval\Subsets\Test\562.txt</slot>
<slot name="_score_source" type="string"></slot>
```

```
<slot name="region" type="region">
<region end="9072" start="9062">chest pain</region>
</slot>
<slot name="_score_region" type="string"></slot>
<slot name="rule" type="string">HealthStatusItemPkg/0</slot>
<slot name="ConceptName" type="string">CHEST PAIN UNSPECIFIED</slot>
<slot name="_score_ConceptName" type="string"></slot>
<slot name="SemanticType" type="string">Sign or Symptom</slot>
<slot name="BodyLocations" type="string">CHEST</slot>
<slot name="_score_BodyLocations" type="string"></slot>
<slot name="SeverityStrings" type="string"></slot>
<slot name="UMLS_CUI" type="string">C1535568</slot>
<slot name="DaysBeforeDeath" type="int">0</slot>
<slot name="PAIN" type="string">Y</slot>
<slot name="MaxPain" type="int">1</slot>
<slot name="SeverityScale" type="int">1</slot>
<slot name="_score_SeverityScale" type="string"></slot>
<slot name="polarity" type="string">POSITIVE</slot>
<slot name="DocType" type="string"></slot>
<slot name="PatientID" type="int">0</slot>
<slot name="DateObject" type="record"/>
<slot name="enddate" type="date">
<date day="3" month="11" year="1992"/>
</slot>
<slot name="_score_enddate" type="string"></slot>
```

```
<slot name="startdate" type="date">
<date day="3" month="11" year="1992"/>
</slot>
<slot name="_score_startdate" type="string"></slot>
<slot name="Patient" type="string">PATIENT</slot>
<slot name="_score_Patient" type="string"></slot>
<slot name="_keyref" type="record"/>
<slot name="_score" type="string"></slot>
<slot name="_type" type="string"></slot>
</record>
<record id="1" template="HealthStatusRecord">
<slot name="ScoreType" type="string">HealthStatusRecord</slot>
<slot name="_score_ScoreType" type="string">CORRECT</slot>
<slot name="source" type="string">C:\i2b2 eval\Subsets\Test\562.txt</slot>
<slot name="_score_source" type="string">CORRECT</slot>
<slot name="region" type="region">
<region end="9072" start="9062">chest pain</region>
</slot>
<slot name="_score_region" type="string">CORRECT</slot>
<slot name="rule" type="string">HealthStatusItemPkg/0</slot>
<slot name="ConceptName" type="string">CHEST PAIN</slot>
<slot name="_score_ConceptName" type="string">INCORRECT</slot>
<slot name="SemanticType" type="string">Sign or Symptom</slot>
<slot name="BodyLocations" type="string">CHEST</slot>
<slot name="_score_BodyLocations" type="string">CORRECT</slot>
```

<slot name="SeverityStrings" type="string"></slot>  
<slot name="UMLS\_CUI" type="string">C0008031</slot>  
<slot name="DaysBeforeDeath" type="int">0</slot>  
<slot name="PAIN" type="string">Y</slot>  
<slot name="MaxPain" type="int">1</slot>  
<slot name="SeverityScale" type="int">1</slot>  
<slot name="\_score\_SeverityScale" type="string">CORRECT</slot>  
<slot name="polarity" type="string">POSITIVE</slot>  
<slot name="DocType" type="string"></slot>  
<slot name="PatientID" type="int">0</slot>  
<slot name="DateObject" type="record"/>  
<slot name="enddate" type="date">  
<date day="3" month="11" year="1992"/>  
</slot>  
<slot name="\_score\_enddate" type="string">CORRECT</slot>  
<slot name="startdate" type="date">  
<date day="3" month="11" year="1992"/>  
</slot>  
<slot name="\_score\_startdate" type="string">CORRECT</slot>  
<slot name="Patient" type="string">PATIENT</slot>  
<slot name="\_score\_Patient" type="string">CORRECT</slot>  
<slot name="\_keyref" type="record">  
<record ref="0"/>  
</slot>  
<slot name="\_score" type="string">INCORRECT</slot>

```
<slot name="_type" type="string"></slot>
</record>
<record id="2" template="HealthStatusRecord">
<slot name="ScoreType" type="string">HealthStatusRecord</slot>
<slot name="_score_ScoreType" type="string"></slot>
<slot name="source" type="string">C:\i2b2 eval\Subsets\Test\562.txt</slot>
<slot name="_score_source" type="string"></slot>
<slot name="region" type="region">
<region end="2044" start="2034">chest pain</region>
</slot>
<slot name="_score_region" type="string"></slot>
<slot name="rule" type="string">HealthStatusItemPkg/0</slot>
<slot name="ConceptName" type="string">CHEST PAIN UNSPECIFIED</slot>
<slot name="_score_ConceptName" type="string"></slot>
<slot name="SemanticType" type="string">Sign or Symptom</slot>
<slot name="BodyLocations" type="string">CHEST</slot>
<slot name="_score_BodyLocations" type="string"></slot>
<slot name="SeverityStrings" type="string"></slot>
<slot name="UMLS_CUI" type="string">C1535568</slot>
<slot name="DaysBeforeDeath" type="int">0</slot>
<slot name="PAIN" type="string">Y</slot>
<slot name="MaxPain" type="int">1</slot>
<slot name="SeverityScale" type="int">1</slot>
<slot name="_score_SeverityScale" type="string"></slot>
<slot name="polarity" type="string">POSITIVE</slot>
```



```
<slot name="DocType" type="string"></slot>
<slot name="PatientID" type="int">0</slot>
<slot name="DateObject" type="record"/>
<slot name="enddate" type="date">
<date day="3" month="11" year="1992"/>
</slot>
<slot name="_score_enddate" type="string"></slot>
<slot name="startdate" type="date">
<date day="3" month="11" year="1992"/>
</slot>
<slot name="_score_startdate" type="string"></slot>
<slot name="Patient" type="string">PATIENT</slot>
<slot name="_score_Patient" type="string"></slot>
<slot name="_keyref" type="record"/>
<slot name="_score" type="string"></slot>
<slot name="_type" type="string"></slot>
</record>
<record id="3" template="HealthStatusRecord">
<slot name="ScoreType" type="string">HealthStatusRecord</slot>
<slot name="_score_ScoreType" type="string">CORRECT</slot>
<slot name="source" type="string">C:\i2b2 eval\Subsets\Test\562.txt</slot>
<slot name="_score_source" type="string">CORRECT</slot>
<slot name="region" type="region">
<region end="2044" start="2034">chest pain</region>
</slot>
```

<slot name="\_score\_region" type="string">CORRECT</slot>  
<slot name="rule" type="string">HealthStatusItemPkg/0</slot>  
<slot name="ConceptName" type="string">CHEST PAIN</slot>  
<slot name="\_score\_ConceptName" type="string">INCORRECT</slot>  
<slot name="SemanticType" type="string">Sign or Symptom</slot>  
<slot name="BodyLocations" type="string">CHEST</slot>  
<slot name="\_score\_BodyLocations" type="string">CORRECT</slot>  
<slot name="SeverityStrings" type="string"></slot>  
<slot name="UMLS\_CUI" type="string">C0008031</slot>  
<slot name="DaysBeforeDeath" type="int">0</slot>  
<slot name="PAIN" type="string">Y</slot>  
<slot name="MaxPain" type="int">1</slot>  
<slot name="SeverityScale" type="int">1</slot>  
<slot name="\_score\_SeverityScale" type="string">CORRECT</slot>  
<slot name="polarity" type="string">POSITIVE</slot>  
<slot name="DocType" type="string"></slot>  
<slot name="PatientID" type="int">0</slot>  
<slot name="DateObject" type="record"/>  
<slot name="enddate" type="date">  
<date day="3" month="11" year="1992"/>  
</slot>  
<slot name="\_score\_enddate" type="string">CORRECT</slot>  
<slot name="startdate" type="date">  
<date day="3" month="11" year="1992"/>  
</slot>

```
<slot name="_score_startdate" type="string">CORRECT</slot>
<slot name="Patient" type="string">PATIENT</slot>
<slot name="_score_Patient" type="string">CORRECT</slot>
<slot name="_keyref" type="record">
<record ref="2"/>
</slot>
<slot name="_score" type="string">INCORRECT</slot>
<slot name="_type" type="string"></slot>
</record>
<record id="4" template="HealthStatusRecord">
<slot name="ScoreType" type="string">HealthStatusRecord</slot>
<slot name="_score_ScoreType" type="string"></slot>
<slot name="source" type="string">C:\i2b2 eval\Subsets\Test\562.txt</slot>
<slot name="_score_source" type="string"></slot>
<slot name="region" type="region">
<region end="9072" start="9062">chest pain</region>
</slot>
<slot name="_score_region" type="string"></slot>
<slot name="rule" type="string">HealthStatusItemPkg/0</slot>
<slot name="ConceptName" type="string">CHEST PAIN UNSPECIFIED</slot>
<slot name="_score_ConceptName" type="string"></slot>
<slot name="SemanticType" type="string">Sign or Symptom</slot>
<slot name="BodyLocations" type="string">CHEST</slot>
<slot name="_score_BodyLocations" type="string"></slot>
<slot name="SeverityStrings" type="string"></slot>
```

```
<slot name="UMLS_CUI" type="string">C1535568</slot>
<slot name="DaysBeforeDeath" type="int">0</slot>
<slot name="PAIN" type="string">Y</slot>
<slot name="MaxPain" type="int">1</slot>
<slot name="SeverityScale" type="int">1</slot>
<slot name="_score_SeverityScale" type="string"></slot>
<slot name="polarity" type="string">POSITIVE</slot>
<slot name="DocType" type="string"></slot>
<slot name="PatientID" type="int">0</slot>
<slot name="DateObject" type="record"/>
<slot name="enddate" type="date">
<date day="3" month="11" year="1992"/>
</slot>
<slot name="_score_enddate" type="string"></slot>
<slot name="startdate" type="date">
<date day="3" month="11" year="1992"/>
</slot>
<slot name="_score_startdate" type="string"></slot>
<slot name="Patient" type="string">PATIENT</slot>
<slot name="_score_Patient" type="string"></slot>
<slot name="_keyref" type="record"/>
<slot name="_score" type="string"></slot>
<slot name="_type" type="string"></slot>
</record>
<record id="5" template="HealthStatusRecord">
```

<slot name="ScoreType" type="string">HealthStatusRecord</slot>  
<slot name="\_score\_ScoreType" type="string">SPURIOUS</slot>  
<slot name="source" type="string">C:\i2b2 eval\Subsets\Test\562.txt</slot>  
<slot name="\_score\_source" type="string">SPURIOUS</slot>  
<slot name="region" type="region">  
<region end="8981" start="8975">angina</region>  
</slot>  
<slot name="\_score\_region" type="string">SPURIOUS</slot>  
<slot name="rule" type="string">HealthStatusItemPkg/0</slot>  
<slot name="ConceptName" type="string">ANGINA PECTORIS</slot>  
<slot name="\_score\_ConceptName" type="string">SPURIOUS</slot>  
<slot name="SemanticType" type="string">Sign or Symptom</slot>  
<slot name="BodyLocations" type="string">CHEST</slot>  
<slot name="\_score\_BodyLocations" type="string">SPURIOUS</slot>  
<slot name="SeverityStrings" type="string"></slot>  
<slot name="UMLS\_CUI" type="string">C0002962</slot>  
<slot name="DaysBeforeDeath" type="int">0</slot>  
<slot name="PAIN" type="string">Y</slot>  
<slot name="MaxPain" type="int">1</slot>  
<slot name="SeverityScale" type="int">1</slot>  
<slot name="\_score\_SeverityScale" type="string">SPURIOUS</slot>  
<slot name="polarity" type="string">POSITIVE</slot>  
<slot name="DocType" type="string"></slot>  
<slot name="PatientID" type="int">0</slot>  
<slot name="DateObject" type="record"/>

```
<slot name="enddate" type="date">
<date day="3" month="11" year="1992"/>
</slot>
<slot name="_score_enddate" type="string">SPURIOUS</slot>
<slot name="startdate" type="date">
<date day="3" month="11" year="1992"/>
</slot>
<slot name="_score_startdate" type="string">SPURIOUS</slot>
<slot name="Patient" type="string">PATIENT</slot>
<slot name="_score_Patient" type="string">SPURIOUS</slot>
<slot name="_keyref" type="record"/>
<slot name="_score" type="string">SPURIOUS</slot>
<slot name="_type" type="string"></slot>
</record>
<record id="6" template="HealthStatusRecord">
<slot name="ScoreType" type="string">HealthStatusRecord</slot>
<slot name="_score_ScoreType" type="string"></slot>
<slot name="source" type="string">C:\i2b2 eval\Subsets\Test\562.txt</slot>
<slot name="_score_source" type="string"></slot>
<slot name="region" type="region">
<region end="9590" start="9580">chest pain</region>
</slot>
<slot name="_score_region" type="string"></slot>
<slot name="rule" type="string">HealthStatusItemPkg/0</slot>
<slot name="ConceptName" type="string">CHEST PAIN UNSPECIFIED</slot>
```

<slot name="\_score\_ConceptName" type="string"></slot>  
<slot name="SemanticType" type="string">Sign or Symptom</slot>  
<slot name="BodyLocations" type="string">CHEST</slot>  
<slot name="\_score\_BodyLocations" type="string"></slot>  
<slot name="SeverityStrings" type="string"></slot>  
<slot name="UMLS\_CUI" type="string">C1535568</slot>  
<slot name="DaysBeforeDeath" type="int">0</slot>  
<slot name="PAIN" type="string">Y</slot>  
<slot name="MaxPain" type="int">1</slot>  
<slot name="SeverityScale" type="int">0</slot>  
<slot name="\_score\_SeverityScale" type="string"></slot>  
<slot name="polarity" type="string">POSITIVE</slot>  
<slot name="DocType" type="string"></slot>  
<slot name="PatientID" type="int">0</slot>  
<slot name="DateObject" type="record"/>  
<slot name="enddate" type="date">  
<date day="3" month="11" year="1992"/>  
</slot>  
<slot name="\_score\_enddate" type="string"></slot>  
<slot name="startdate" type="date">  
<date day="3" month="11" year="1992"/>  
</slot>  
<slot name="\_score\_startdate" type="string"></slot>  
<slot name="Patient" type="string">PATIENT</slot>  
<slot name="\_score\_Patient" type="string"></slot>

```
<slot name="_keyref" type="record"/>
<slot name="_score" type="string"></slot>
<slot name="_type" type="string"></slot>
</record>
<record id="7" template="HealthStatusRecord">
<slot name="ScoreType" type="string">HealthStatusRecord</slot>
<slot name="_score_ScoreType" type="string"></slot>
<slot name="source" type="string">C:\i2b2 eval\Subsets\Test\562.txt</slot>
<slot name="_score_source" type="string"></slot>
<slot name="region" type="region">
<region end="9403" start="9393">chest pain</region>
</slot>
<slot name="_score_region" type="string"></slot>
<slot name="rule" type="string">HealthStatusItemPkg/0</slot>
<slot name="ConceptName" type="string">CHEST PAIN UNSPECIFIED</slot>
<slot name="_score_ConceptName" type="string"></slot>
<slot name="SemanticType" type="string">Sign or Symptom</slot>
<slot name="BodyLocations" type="string">CHEST</slot>
<slot name="_score_BodyLocations" type="string"></slot>
<slot name="SeverityStrings" type="string">DENIED</slot>
<slot name="UMLS_CUI" type="string">C1535568</slot>
<slot name="DaysBeforeDeath" type="int">0</slot>
<slot name="PAIN" type="string">Y</slot>
<slot name="MaxPain" type="int">1</slot>
<slot name="SeverityScale" type="int">0</slot>
```



```
<slot name="_score_SeverityScale" type="string"></slot>
<slot name="polarity" type="string">POSITIVE</slot>
<slot name="DocType" type="string"></slot>
<slot name="PatientID" type="int">0</slot>
<slot name="DateObject" type="record"/>
<slot name="enddate" type="date">
<date day="3" month="11" year="1992"/>
</slot>
<slot name="_score_enddate" type="string"></slot>
<slot name="startdate" type="date">
<date day="3" month="11" year="1992"/>
</slot>
<slot name="_score_startdate" type="string"></slot>
<slot name="Patient" type="string">PATIENT</slot>
<slot name="_score_Patient" type="string"></slot>
<slot name="_keyref" type="record"/>
<slot name="_score" type="string"></slot>
<slot name="_type" type="string"></slot>
</record>
<record id="8" template="HealthStatusRecord">
<slot name="ScoreType" type="string">HealthStatusRecord</slot>
<slot name="_score_ScoreType" type="string"></slot>
<slot name="source" type="string">C:\i2b2 eval\Subsets\Test\562.txt</slot>
<slot name="_score_source" type="string"></slot>
<slot name="region" type="region">
```

<region end="9403" start="9393">chest pain</region>  
</slot>  
<slot name="\_score\_region" type="string"></slot>  
<slot name="rule" type="string">HealthStatusItemPkg/0</slot>  
<slot name="ConceptName" type="string">CHEST PAIN UNSPECIFIED</slot>  
<slot name="\_score\_ConceptName" type="string"></slot>  
<slot name="SemanticType" type="string">Sign or Symptom</slot>  
<slot name="BodyLocations" type="string">CHEST</slot>  
<slot name="\_score\_BodyLocations" type="string"></slot>  
<slot name="SeverityStrings" type="string">DENIED</slot>  
<slot name="UMLS\_CUI" type="string">C1535568</slot>  
<slot name="DaysBeforeDeath" type="int">0</slot>  
<slot name="PAIN" type="string">Y</slot>  
<slot name="MaxPain" type="int">1</slot>  
<slot name="SeverityScale" type="int">0</slot>  
<slot name="\_score\_SeverityScale" type="string"></slot>  
<slot name="polarity" type="string">POSITIVE</slot>  
<slot name="DocType" type="string"></slot>  
<slot name="PatientID" type="int">0</slot>  
<slot name="DateObject" type="record"/>  
<slot name="enddate" type="date">  
<date day="3" month="11" year="1992"/>  
</slot>  
<slot name="\_score\_enddate" type="string"></slot>  
<slot name="startdate" type="date">

```
<date day="3" month="11" year="1992"/>
</slot>
<slot name="_score_startdate" type="string"></slot>
<slot name="Patient" type="string">PATIENT</slot>
<slot name="_score_Patient" type="string"></slot>
<slot name="_keyref" type="record"/>
<slot name="_score" type="string"></slot>
<slot name="_type" type="string"></slot>
</record>
<record id="9" template="HealthStatusRecord">
<slot name="ScoreType" type="string">HealthStatusRecord</slot>
<slot name="_score_ScoreType" type="string">CORRECT</slot>
<slot name="source" type="string">C:\i2b2 eval\Subsets\Test\562.txt</slot>
<slot name="_score_source" type="string">CORRECT</slot>
<slot name="region" type="region">
<region end="9403" start="9393">chest pain</region>
</slot>
<slot name="_score_region" type="string">CORRECT</slot>
<slot name="rule" type="string">HealthStatusItemPkg/0</slot>
<slot name="ConceptName" type="string">CHEST PAIN</slot>
<slot name="_score_ConceptName" type="string">INCORRECT</slot>
<slot name="SemanticType" type="string">Sign or Symptom</slot>
<slot name="BodyLocations" type="string">CHEST</slot>
<slot name="_score_BodyLocations" type="string">CORRECT</slot>
<slot name="SeverityStrings" type="string">DENIED</slot>
```

<slot name="UMLS\_CUI" type="string">C0008031</slot>  
<slot name="DaysBeforeDeath" type="int">0</slot>  
<slot name="PAIN" type="string">Y</slot>  
<slot name="MaxPain" type="int">1</slot>  
<slot name="SeverityScale" type="int">0</slot>  
<slot name="\_score\_SeverityScale" type="string">CORRECT</slot>  
<slot name="polarity" type="string">POSITIVE</slot>  
<slot name="DocType" type="string"></slot>  
<slot name="PatientID" type="int">0</slot>  
<slot name="DateObject" type="record"/>  
<slot name="enddate" type="date">  
<date day="3" month="11" year="1992"/>  
</slot>  
<slot name="\_score\_enddate" type="string">CORRECT</slot>  
<slot name="startdate" type="date">  
<date day="3" month="11" year="1992"/>  
</slot>  
<slot name="\_score\_startdate" type="string">CORRECT</slot>  
<slot name="Patient" type="string">PATIENT</slot>  
<slot name="\_score\_Patient" type="string">CORRECT</slot>  
<slot name="\_keyref" type="record">  
<record ref="8"/>  
</slot>  
<slot name="\_score" type="string">INCORRECT</slot>  
<slot name="\_type" type="string"></slot>

```
</record>
<record id="10" template="HealthStatusRecord">
  <slot name="ScoreType" type="string">HealthStatusRecord</slot>
  <slot name="_score_ScoreType" type="string"></slot>
  <slot name="source" type="string">C:\i2b2 eval\Subsets\Test\562.txt</slot>
  <slot name="_score_source" type="string"></slot>
  <slot name="region" type="region">
    <region end="2044" start="2034">chest pain</region>
  </slot>
  <slot name="_score_region" type="string"></slot>
  <slot name="rule" type="string">HealthStatusItemPkg/0</slot>
  <slot name="ConceptName" type="string">CHEST PAIN UNSPECIFIED</slot>
  <slot name="_score_ConceptName" type="string"></slot>
  <slot name="SemanticType" type="string">Sign or Symptom</slot>
  <slot name="BodyLocations" type="string">CHEST</slot>
  <slot name="_score_BodyLocations" type="string"></slot>
  <slot name="SeverityStrings" type="string"></slot>
  <slot name="UMLS_CUI" type="string">C1535568</slot>
  <slot name="DaysBeforeDeath" type="int">0</slot>
  <slot name="PAIN" type="string">Y</slot>
  <slot name="MaxPain" type="int">1</slot>
  <slot name="SeverityScale" type="int">1</slot>
  <slot name="_score_SeverityScale" type="string"></slot>
  <slot name="polarity" type="string">POSITIVE</slot>
  <slot name="DocType" type="string"></slot>
```

```
<slot name="PatientID" type="int">0</slot>
<slot name="DateObject" type="record"/>
<slot name="enddate" type="date">
<date day="3" month="11" year="1992"/>
</slot>
<slot name="_score_enddate" type="string"></slot>
<slot name="startdate" type="date">
<date day="3" month="11" year="1992"/>
</slot>
<slot name="_score_startdate" type="string"></slot>
<slot name="Patient" type="string">PATIENT</slot>
<slot name="_score_Patient" type="string"></slot>
<slot name="_keyref" type="record"/>
<slot name="_score" type="string"></slot>
<slot name="_type" type="string"></slot>
</record>
<record id="11" template="HealthStatusRecord">
<slot name="ScoreType" type="string">HealthStatusRecord</slot>
<slot name="_score_ScoreType" type="string"></slot>
<slot name="source" type="string">C:\i2b2 eval\Subsets\Test\562.txt</slot>
<slot name="_score_source" type="string"></slot>
<slot name="region" type="region">
<region end="9590" start="9580">chest pain</region>
</slot>
<slot name="_score_region" type="string"></slot>
```

<slot name="rule" type="string">HealthStatusItemPkg/0</slot>  
<slot name="ConceptName" type="string">CHEST PAIN UNSPECIFIED</slot>  
<slot name="\_score\_ConceptName" type="string"></slot>  
<slot name="SemanticType" type="string">Sign or Symptom</slot>  
<slot name="BodyLocations" type="string">CHEST</slot>  
<slot name="\_score\_BodyLocations" type="string"></slot>  
<slot name="SeverityStrings" type="string"></slot>  
<slot name="UMLS\_CUI" type="string">C1535568</slot>  
<slot name="DaysBeforeDeath" type="int">0</slot>  
<slot name="PAIN" type="string">Y</slot>  
<slot name="MaxPain" type="int">1</slot>  
<slot name="SeverityScale" type="int">0</slot>  
<slot name="\_score\_SeverityScale" type="string"></slot>  
<slot name="polarity" type="string">POSITIVE</slot>  
<slot name="DocType" type="string"></slot>  
<slot name="PatientID" type="int">0</slot>  
<slot name="DateObject" type="record"/>  
<slot name="enddate" type="date">  
<date day="3" month="11" year="1992"/>  
</slot>  
<slot name="\_score\_enddate" type="string"></slot>  
<slot name="startdate" type="date">  
<date day="3" month="11" year="1992"/>  
</slot>  
<slot name="\_score\_startdate" type="string"></slot>

```
<slot name="Patient" type="string">PATIENT</slot>
<slot name="_score_Patient" type="string"></slot>
<slot name="_keyref" type="record"/>
<slot name="_score" type="string"></slot>
<slot name="_type" type="string"></slot>
</record>

<record id="12" template="HealthStatusRecord">
<slot name="ScoreType" type="string">HealthStatusRecord</slot>
<slot name="_score_ScoreType" type="string">CORRECT</slot>
<slot name="source" type="string">C:\i2b2 eval\Subsets\Test\562.txt</slot>
<slot name="_score_source" type="string">CORRECT</slot>
<slot name="region" type="region">
<region end="9590" start="9580">chest pain</region>
</slot>
<slot name="_score_region" type="string">CORRECT</slot>
<slot name="rule" type="string">HealthStatusItemPkg/0</slot>
<slot name="ConceptName" type="string">CHEST PAIN</slot>
<slot name="_score_ConceptName" type="string">INCORRECT</slot>
<slot name="SemanticType" type="string">Sign or Symptom</slot>
<slot name="BodyLocations" type="string">CHEST</slot>
<slot name="_score_BodyLocations" type="string">CORRECT</slot>
<slot name="SeverityStrings" type="string"></slot>
<slot name="UMLS_CUI" type="string">C0008031</slot>
<slot name="DaysBeforeDeath" type="int">0</slot>
<slot name="PAIN" type="string">Y</slot>
```



```
<slot name="MaxPain" type="int">1</slot>
<slot name="SeverityScale" type="int">1</slot>
<slot name="_score_SeverityScale" type="string">INCORRECT</slot>
<slot name="polarity" type="string">POSITIVE</slot>
<slot name="DocType" type="string"></slot>
<slot name="PatientID" type="int">0</slot>
<slot name="DateObject" type="record"/>
<slot name="enddate" type="date">
<date day="3" month="11" year="1992"/>
</slot>
<slot name="_score_enddate" type="string">CORRECT</slot>
<slot name="startdate" type="date">
<date day="3" month="11" year="1992"/>
</slot>
<slot name="_score_startdate" type="string">CORRECT</slot>
<slot name="Patient" type="string">PATIENT</slot>
<slot name="_score_Patient" type="string">CORRECT</slot>
<slot name="_keyref" type="record">
<record ref="11"/>
</slot>
<slot name="_score" type="string">INCORRECT</slot>
<slot name="_type" type="string"></slot>
</record>
<record id="13" template="HealthStatusRecord">
<slot name="ScoreType" type="string">HealthStatusRecord</slot>
```

<slot name="\_score\_ScoreType" type="string">SPURIOUS</slot>  
<slot name="source" type="string">C:\i2b2 eval\Subsets\Test\562.txt</slot>  
<slot name="\_score\_source" type="string">SPURIOUS</slot>  
<slot name="region" type="region">  
<region end="932" start="926">angina</region>  
</slot>  
<slot name="\_score\_region" type="string">SPURIOUS</slot>  
<slot name="rule" type="string">HealthStatusItemPkg/0</slot>  
<slot name="ConceptName" type="string">ANGINA PECTORIS</slot>  
<slot name="\_score\_ConceptName" type="string">SPURIOUS</slot>  
<slot name="SemanticType" type="string">Sign or Symptom</slot>  
<slot name="BodyLocations" type="string">CHEST</slot>  
<slot name="\_score\_BodyLocations" type="string">SPURIOUS</slot>  
<slot name="SeverityStrings" type="string"></slot>  
<slot name="UMLS\_CUI" type="string">C0002962</slot>  
<slot name="DaysBeforeDeath" type="int">0</slot>  
<slot name="PAIN" type="string">Y</slot>  
<slot name="MaxPain" type="int">1</slot>  
<slot name="SeverityScale" type="int">1</slot>  
<slot name="\_score\_SeverityScale" type="string">SPURIOUS</slot>  
<slot name="polarity" type="string">POSITIVE</slot>  
<slot name="DocType" type="string"></slot>  
<slot name="PatientID" type="int">0</slot>  
<slot name="DateObject" type="record"/>  
<slot name="enddate" type="date">

```
<date day="3" month="11" year="1992"/>
</slot>
<slot name="_score_enddate" type="string">SPURIOUS</slot>
<slot name="startdate" type="date">
<date day="3" month="11" year="1992"/>
</slot>
<slot name="_score_startdate" type="string">SPURIOUS</slot>
<slot name="Patient" type="string">PATIENT</slot>
<slot name="_score_Patient" type="string">SPURIOUS</slot>
<slot name="_keyref" type="record"/>
<slot name="_score" type="string">SPURIOUS</slot>
<slot name="_type" type="string"></slot>
</record>
</records>
</infStore>
<?xml version="1.0" encoding="UTF-8"?>
<infStore>
<records>
<record id="0" template="HealthStatusRecord">
<slot name="ScoreType" type="string">HealthStatusRecord</slot>
<slot name="_score_ScoreType" type="string"></slot>
<slot name="source" type="string">C:\i2b2 eval\Subsets\Test\564.txt</slot>
<slot name="_score_source" type="string"></slot>
<slot name="region" type="region">
<region end="3636" start="3627">pain free</region>
```

</slot>  
<slot name="\_score\_region" type="string"></slot>  
<slot name="rule" type="string">HealthStatusItemPkg/0</slot>  
<slot name="ConceptName" type="string">ABSENCE OF PAIN</slot>  
<slot name="\_score\_ConceptName" type="string"></slot>  
<slot name="SemanticType" type="string">Sign or Symptom</slot>  
<slot name="BodyLocations" type="string">CHEST</slot>  
<slot name="\_score\_BodyLocations" type="string"></slot>  
<slot name="SeverityStrings" type="string"></slot>  
<slot name="UMLS\_CUI" type="string">C0234225</slot>  
<slot name="DaysBeforeDeath" type="int">0</slot>  
<slot name="PAIN" type="string">Y</slot>  
<slot name="MaxPain" type="int">3</slot>  
<slot name="SeverityScale" type="int">0</slot>  
<slot name="\_score\_SeverityScale" type="string"></slot>  
<slot name="polarity" type="string">POSITIVE</slot>  
<slot name="DocType" type="string"></slot>  
<slot name="PatientID" type="int">0</slot>  
<slot name="DateObject" type="record"/>  
<slot name="enddate" type="date">  
<date day="24" month="10" year="1993"/>  
</slot>  
<slot name="\_score\_enddate" type="string"></slot>  
<slot name="startdate" type="date">  
<date day="24" month="10" year="1993"/>

```
</slot>
<slot name="_score_startdate" type="string"></slot>
<slot name="Patient" type="string">PATIENT</slot>
<slot name="_score_Patient" type="string"></slot>
<slot name="_keyref" type="record"/>
<slot name="_score" type="string"></slot>
<slot name="_type" type="string"></slot>
</record>
<record id="1" template="HealthStatusRecord">
<slot name="ScoreType" type="string">HealthStatusRecord</slot>
<slot name="_score_ScoreType" type="string">CORRECT</slot>
<slot name="source" type="string">C:\i2b2 eval\Subsets\Test\564.txt</slot>
<slot name="_score_source" type="string">CORRECT</slot>
<slot name="region" type="region">
<region end="3636" start="3627">pain free</region>
</slot>
<slot name="_score_region" type="string">CORRECT</slot>
<slot name="rule" type="string">HealthStatusItemPkg/0</slot>
<slot name="ConceptName" type="string">ABSENCE OF PAIN</slot>
<slot name="_score_ConceptName" type="string">CORRECT</slot>
<slot name="SemanticType" type="string">Sign or Symptom</slot>
<slot name="BodyLocations" type="string"></slot>
<slot name="_score_BodyLocations" type="string">MISSING</slot>
<slot name="SeverityStrings" type="string"></slot>
<slot name="UMLS_CUI" type="string">C0234225</slot>
```

```
<slot name="DaysBeforeDeath" type="int">0</slot>
<slot name="PAIN" type="string">Y</slot>
<slot name="MaxPain" type="int">3</slot>
<slot name="SeverityScale" type="int">0</slot>
<slot name="_score_SeverityScale" type="string">CORRECT</slot>
<slot name="polarity" type="string">POSITIVE</slot>
<slot name="DocType" type="string"></slot>
<slot name="PatientID" type="int">0</slot>
<slot name="DateObject" type="record"/>
<slot name="enddate" type="date">
<date day="24" month="10" year="1993"/>
</slot>
<slot name="_score_enddate" type="string">CORRECT</slot>
<slot name="startdate" type="date">
<date day="24" month="10" year="1993"/>
</slot>
<slot name="_score_startdate" type="string">CORRECT</slot>
<slot name="Patient" type="string">PATIENT</slot>
<slot name="_score_Patient" type="string">CORRECT</slot>
<slot name="_keyref" type="record">
<record ref="0"/>
</slot>
<slot name="_score" type="string">INCORRECT</slot>
<slot name="_type" type="string"></slot>
</record>
```

```
<record id="2" template="HealthStatusRecord">
  <slot name="ScoreType" type="string">HealthStatusRecord</slot>
  <slot name="_score_ScoreType" type="string"></slot>
  <slot name="source" type="string">C:\i2b2 eval\Subsets\Test\564.txt</slot>
  <slot name="_score_source" type="string"></slot>
  <slot name="region" type="region">
    <region end="994" start="973">substernal chest pain</region>
  </slot>
  <slot name="_score_region" type="string"></slot>
  <slot name="rule" type="string">HealthStatusItemPkg/0</slot>
  <slot name="ConceptName" type="string">RETROSTERNAL CHEST PAIN</slot>
  <slot name="_score_ConceptName" type="string"></slot>
  <slot name="SemanticType" type="string">Sign or Symptom</slot>
  <slot name="BodyLocations" type="string">STERNUM</slot>
  <slot name="_score_BodyLocations" type="string"></slot>
  <slot name="SeverityStrings" type="string">CRUSHING</slot>
  <slot name="UMLS_CUI" type="string">C0151826</slot>
  <slot name="DaysBeforeDeath" type="int">0</slot>
  <slot name="PAIN" type="string">Y</slot>
  <slot name="MaxPain" type="int">3</slot>
  <slot name="SeverityScale" type="int">3</slot>
  <slot name="_score_SeverityScale" type="string"></slot>
  <slot name="polarity" type="string">POSITIVE</slot>
  <slot name="DocType" type="string"></slot>
  <slot name="PatientID" type="int">0</slot>
```

```
<slot name="DateObject" type="record"/>
<slot name="enddate" type="date">
<date day="24" month="10" year="1993"/>
</slot>
<slot name="_score_enddate" type="string"></slot>
<slot name="startdate" type="date">
<date day="24" month="10" year="1993"/>
</slot>
<slot name="_score_startdate" type="string"></slot>
<slot name="Patient" type="string">PATIENT</slot>
<slot name="_score_Patient" type="string"></slot>
<slot name="_keyref" type="record"/>
<slot name="_score" type="string"></slot>
<slot name="_type" type="string"></slot>
</record>
<record id="3" template="HealthStatusRecord">
<slot name="ScoreType" type="string">HealthStatusRecord</slot>
<slot name="_score_ScoreType" type="string">CORRECT</slot>
<slot name="source" type="string">C:\i2b2 eval\Subsets\Test\564.txt</slot>
<slot name="_score_source" type="string">CORRECT</slot>
<slot name="region" type="region">
<region end="994" start="973">substernal chest pain</region>
</slot>
<slot name="_score_region" type="string">CORRECT</slot>
<slot name="rule" type="string">HealthStatusItemPkg/0</slot>
```



<slot name="ConceptName" type="string">RETROSTERNAL CHEST PAIN</slot>  
<slot name="\_score\_ConceptName" type="string">CORRECT</slot>  
<slot name="SemanticType" type="string">Sign or Symptom</slot>  
<slot name="BodyLocations" type="string">STERNUM</slot>  
<slot name="\_score\_BodyLocations" type="string">CORRECT</slot>  
<slot name="SeverityStrings" type="string">CRUSHING</slot>  
<slot name="UMLS\_CUI" type="string">C0151826</slot>  
<slot name="DaysBeforeDeath" type="int">0</slot>  
<slot name="PAIN" type="string">Y</slot>  
<slot name="MaxPain" type="int">3</slot>  
<slot name="SeverityScale" type="int">3</slot>  
<slot name="\_score\_SeverityScale" type="string">CORRECT</slot>  
<slot name="polarity" type="string">POSITIVE</slot>  
<slot name="DocType" type="string"></slot>  
<slot name="PatientID" type="int">0</slot>  
<slot name="DateObject" type="record"/>  
<slot name="enddate" type="date">  
<date day="31" month="5" year="1993"/>  
</slot>  
<slot name="\_score\_enddate" type="string">INCORRECT</slot>  
<slot name="startdate" type="date">  
<date day="1" month="5" year="1993"/>  
</slot>  
<slot name="\_score\_startdate" type="string">INCORRECT</slot>  
<slot name="Patient" type="string">PATIENT</slot>

```
<slot name="_score_Patient" type="string">CORRECT</slot>
<slot name="_keyref" type="record">
<record ref="2"/>
</slot>
<slot name="_score" type="string">INCORRECT</slot>
<slot name="_type" type="string"></slot>
</record>
<record id="4" template="HealthStatusRecord">
<slot name="ScoreType" type="string">HealthStatusRecord</slot>
<slot name="_score_ScoreType" type="string"></slot>
<slot name="source" type="string">C:\i2b2 eval\Subsets\Test\564.txt</slot>
<slot name="_score_source" type="string"></slot>
<slot name="region" type="region">
<region end="7471" start="7461">chest pain</region>
</slot>
<slot name="_score_region" type="string"></slot>
<slot name="rule" type="string">HealthStatusItemPkg/0</slot>
<slot name="ConceptName" type="string">CHEST PAIN UNSPECIFIED</slot>
<slot name="_score_ConceptName" type="string"></slot>
<slot name="SemanticType" type="string">Sign or Symptom</slot>
<slot name="BodyLocations" type="string">CHEST</slot>
<slot name="_score_BodyLocations" type="string"></slot>
<slot name="SeverityStrings" type="string">WITHOUT ANY</slot>
<slot name="UMLS_CUI" type="string">C1535568</slot>
<slot name="DaysBeforeDeath" type="int">0</slot>
```

```
<slot name="PAIN" type="string">Y</slot>
<slot name="MaxPain" type="int">3</slot>
<slot name="SeverityScale" type="int">0</slot>
<slot name="_score_SeverityScale" type="string"></slot>
<slot name="polarity" type="string">POSITIVE</slot>
<slot name="DocType" type="string"></slot>
<slot name="PatientID" type="int">0</slot>
<slot name="DateObject" type="record"/>
<slot name="enddate" type="date">
<date day="2" month="11" year="1993"/>
</slot>
<slot name="_score_enddate" type="string"></slot>
<slot name="startdate" type="date">
<date day="24" month="10" year="1993"/>
</slot>
<slot name="_score_startdate" type="string"></slot>
<slot name="Patient" type="string">PATIENT</slot>
<slot name="_score_Patient" type="string"></slot>
<slot name="_keyref" type="record"/>
<slot name="_score" type="string"></slot>
<slot name="_type" type="string"></slot>
</record>
<record id="5" template="HealthStatusRecord">
<slot name="ScoreType" type="string">HealthStatusRecord</slot>
<slot name="_score_ScoreType" type="string">CORRECT</slot>
```

<slot name="source" type="string">C:\i2b2 eval\Subsets\Test\564.txt</slot>  
<slot name="\_score\_source" type="string">CORRECT</slot>  
<slot name="region" type="region">  
<region end="7471" start="7461">chest pain</region>  
</slot>  
<slot name="\_score\_region" type="string">CORRECT</slot>  
<slot name="rule" type="string">HealthStatusItemPkg/0</slot>  
<slot name="ConceptName" type="string">CHEST PAIN</slot>  
<slot name="\_score\_ConceptName" type="string">INCORRECT</slot>  
<slot name="SemanticType" type="string">Sign or Symptom</slot>  
<slot name="BodyLocations" type="string">CHEST</slot>  
<slot name="\_score\_BodyLocations" type="string">CORRECT</slot>  
<slot name="SeverityStrings" type="string">WITHOUT ANY</slot>  
<slot name="UMLS\_CUI" type="string">C0008031</slot>  
<slot name="DaysBeforeDeath" type="int">0</slot>  
<slot name="PAIN" type="string">Y</slot>  
<slot name="MaxPain" type="int">3</slot>  
<slot name="SeverityScale" type="int">0</slot>  
<slot name="\_score\_SeverityScale" type="string">CORRECT</slot>  
<slot name="polarity" type="string">POSITIVE</slot>  
<slot name="DocType" type="string"></slot>  
<slot name="PatientID" type="int">0</slot>  
<slot name="DateObject" type="record"/>  
<slot name="enddate" type="date">  
<date day="24" month="10" year="1993"/>

```
</slot>
<slot name="_score_enddate" type="string">INCORRECT</slot>
<slot name="startdate" type="date">
<date day="24" month="10" year="1993"/>
</slot>
<slot name="_score_startdate" type="string">CORRECT</slot>
<slot name="Patient" type="string">PATIENT</slot>
<slot name="_score_Patient" type="string">CORRECT</slot>
<slot name="_keyref" type="record">
<record ref="4"/>
</slot>
<slot name="_score" type="string">INCORRECT</slot>
<slot name="_type" type="string"></slot>
</record>
<record id="6" template="HealthStatusRecord">
<slot name="ScoreType" type="string">HealthStatusRecord</slot>
<slot name="_score_ScoreType" type="string"></slot>
<slot name="source" type="string">C:\i2b2 eval\Subsets\Test\564.txt</slot>
<slot name="_score_source" type="string"></slot>
<slot name="region" type="region">
<region end="8147" start="8137">chest pain</region>
</slot>
<slot name="_score_region" type="string"></slot>
<slot name="rule" type="string">HealthStatusItemPkg/0</slot>
<slot name="ConceptName" type="string">CHEST PAIN UNSPECIFIED</slot>
```

<slot name="\_score\_ConceptName" type="string"></slot>  
<slot name="SemanticType" type="string">Sign or Symptom</slot>  
<slot name="BodyLocations" type="string">CHEST</slot>  
<slot name="\_score\_BodyLocations" type="string"></slot>  
<slot name="SeverityStrings" type="string">NO</slot>  
<slot name="UMLS\_CUI" type="string">C1535568</slot>  
<slot name="DaysBeforeDeath" type="int">0</slot>  
<slot name="PAIN" type="string">Y</slot>  
<slot name="MaxPain" type="int">3</slot>  
<slot name="SeverityScale" type="int">0</slot>  
<slot name="\_score\_SeverityScale" type="string"></slot>  
<slot name="polarity" type="string">POSITIVE</slot>  
<slot name="DocType" type="string"></slot>  
<slot name="PatientID" type="int">0</slot>  
<slot name="DateObject" type="record"/>  
<slot name="enddate" type="date">  
<date day="2" month="11" year="1993"/>  
</slot>  
<slot name="\_score\_enddate" type="string"></slot>  
<slot name="startdate" type="date">  
<date day="2" month="11" year="1993"/>  
</slot>  
<slot name="\_score\_startdate" type="string"></slot>  
<slot name="Patient" type="string">PATIENT</slot>  
<slot name="\_score\_Patient" type="string"></slot>

```
<slot name="_keyref" type="record"/>
<slot name="_score" type="string"></slot>
<slot name="_type" type="string"></slot>
</record>
<record id="7" template="HealthStatusRecord">
<slot name="ScoreType" type="string">HealthStatusRecord</slot>
<slot name="_score_ScoreType" type="string">CORRECT</slot>
<slot name="source" type="string">C:\i2b2 eval\Subsets\Test\564.txt</slot>
<slot name="_score_source" type="string">CORRECT</slot>
<slot name="region" type="region">
<region end="8147" start="8137">chest pain</region>
</slot>
<slot name="_score_region" type="string">CORRECT</slot>
<slot name="rule" type="string">HealthStatusItemPkg/0</slot>
<slot name="ConceptName" type="string">CHEST PAIN</slot>
<slot name="_score_ConceptName" type="string">INCORRECT</slot>
<slot name="SemanticType" type="string">Sign or Symptom</slot>
<slot name="BodyLocations" type="string">CHEST</slot>
<slot name="_score_BodyLocations" type="string">CORRECT</slot>
<slot name="SeverityStrings" type="string">NO</slot>
<slot name="UMLS_CUI" type="string">C0008031</slot>
<slot name="DaysBeforeDeath" type="int">0</slot>
<slot name="PAIN" type="string">Y</slot>
<slot name="MaxPain" type="int">3</slot>
<slot name="SeverityScale" type="int">0</slot>
```

```
<slot name="_score_SeverityScale" type="string">CORRECT</slot>
<slot name="polarity" type="string">POSITIVE</slot>
<slot name="DocType" type="string"></slot>
<slot name="PatientID" type="int">0</slot>
<slot name="DateObject" type="record"/>
<slot name="enddate" type="date">
<date day="24" month="10" year="1993"/>
</slot>
<slot name="_score_enddate" type="string">INCORRECT</slot>
<slot name="startdate" type="date">
<date day="24" month="10" year="1993"/>
</slot>
<slot name="_score_startdate" type="string">INCORRECT</slot>
<slot name="Patient" type="string">PATIENT</slot>
<slot name="_score_Patient" type="string">CORRECT</slot>
<slot name="_keyref" type="record">
<record ref="6"/>
</slot>
<slot name="_score" type="string">INCORRECT</slot>
<slot name="_type" type="string"></slot>
</record>
<record id="8" template="HealthStatusRecord">
<slot name="ScoreType" type="string">HealthStatusRecord</slot>
<slot name="_score_ScoreType" type="string"></slot>
<slot name="source" type="string">C:\i2b2 eval\Subsets\Test\564.txt</slot>
```



<slot name="\_score\_source" type="string"></slot>  
<slot name="region" type="region">  
<region end="7471" start="7461">chest pain</region>  
</slot>  
<slot name="\_score\_region" type="string"></slot>  
<slot name="rule" type="string">HealthStatusItemPkg/0</slot>  
<slot name="ConceptName" type="string">CHEST PAIN UNSPECIFIED</slot>  
<slot name="\_score\_ConceptName" type="string"></slot>  
<slot name="SemanticType" type="string">Sign or Symptom</slot>  
<slot name="BodyLocations" type="string">CHEST</slot>  
<slot name="\_score\_BodyLocations" type="string"></slot>  
<slot name="SeverityStrings" type="string">WITHOUT ANY</slot>  
<slot name="UMLS\_CUI" type="string">C1535568</slot>  
<slot name="DaysBeforeDeath" type="int">0</slot>  
<slot name="PAIN" type="string">Y</slot>  
<slot name="MaxPain" type="int">3</slot>  
<slot name="SeverityScale" type="int">0</slot>  
<slot name="\_score\_SeverityScale" type="string"></slot>  
<slot name="polarity" type="string">POSITIVE</slot>  
<slot name="DocType" type="string"></slot>  
<slot name="PatientID" type="int">0</slot>  
<slot name="DateObject" type="record"/>  
<slot name="enddate" type="date">  
<date day="2" month="11" year="1993"/>  
</slot>

```
<slot name="_score_enddate" type="string"></slot>
<slot name="startdate" type="date">
<date day="24" month="10" year="1993"/>
</slot>
<slot name="_score_startdate" type="string"></slot>
<slot name="Patient" type="string">PATIENT</slot>
<slot name="_score_Patient" type="string"></slot>
<slot name="_keyref" type="record"/>
<slot name="_score" type="string"></slot>
<slot name="_type" type="string"></slot>
</record>
<record id="9" template="HealthStatusRecord">
<slot name="ScoreType" type="string">HealthStatusRecord</slot>
<slot name="_score_ScoreType" type="string"></slot>
<slot name="source" type="string">C:\i2b2 eval\Subsets\Test\564.txt</slot>
<slot name="_score_source" type="string"></slot>
<slot name="region" type="region">
<region end="8147" start="8137">chest pain</region>
</slot>
<slot name="_score_region" type="string"></slot>
<slot name="rule" type="string">HealthStatusItemPkg/0</slot>
<slot name="ConceptName" type="string">CHEST PAIN UNSPECIFIED</slot>
<slot name="_score_ConceptName" type="string"></slot>
<slot name="SemanticType" type="string">Sign or Symptom</slot>
<slot name="BodyLocations" type="string">CHEST</slot>
```

<slot name="\_score\_BodyLocations" type="string"></slot>  
<slot name="SeverityStrings" type="string">NO</slot>  
<slot name="UMLS\_CUI" type="string">C1535568</slot>  
<slot name="DaysBeforeDeath" type="int">0</slot>  
<slot name="PAIN" type="string">Y</slot>  
<slot name="MaxPain" type="int">3</slot>  
<slot name="SeverityScale" type="int">0</slot>  
<slot name="\_score\_SeverityScale" type="string"></slot>  
<slot name="polarity" type="string">POSITIVE</slot>  
<slot name="DocType" type="string"></slot>  
<slot name="PatientID" type="int">0</slot>  
<slot name="DateObject" type="record"/>  
<slot name="enddate" type="date">  
<date day="2" month="11" year="1993"/>  
</slot>  
<slot name="\_score\_enddate" type="string"></slot>  
<slot name="startdate" type="date">  
<date day="2" month="11" year="1993"/>  
</slot>  
<slot name="\_score\_startdate" type="string"></slot>  
<slot name="Patient" type="string">PATIENT</slot>  
<slot name="\_score\_Patient" type="string"></slot>  
<slot name="\_keyref" type="record"/>  
<slot name="\_score" type="string"></slot>  
<slot name="\_type" type="string"></slot>

```
</record>
<record id="10" template="HealthStatusRecord">
  <slot name="ScoreType" type="string">HealthStatusRecord</slot>
  <slot name="_score_ScoreType" type="string"></slot>
  <slot name="source" type="string">C:\i2b2 eval\Subsets\Test\564.txt</slot>
  <slot name="_score_source" type="string"></slot>
  <slot name="region" type="region">
    <region end="1108" start="1089">crushing chest pain</region>
  </slot>
  <slot name="_score_region" type="string"></slot>
  <slot name="rule" type="string"></slot>
  <slot name="ConceptName" type="string">CRUSHING CHEST PAIN</slot>
  <slot name="_score_ConceptName" type="string"></slot>
  <slot name="SemanticType" type="string"></slot>
  <slot name="BodyLocations" type="string">CHEST</slot>
  <slot name="_score_BodyLocations" type="string"></slot>
  <slot name="SeverityStrings" type="string">CRUSHING</slot>
  <slot name="UMLS_CUI" type="string"></slot>
  <slot name="DaysBeforeDeath" type="int">0</slot>
  <slot name="PAIN" type="string">Y</slot>
  <slot name="MaxPain" type="int">0</slot>
  <slot name="SeverityScale" type="int">3</slot>
  <slot name="_score_SeverityScale" type="string"></slot>
  <slot name="polarity" type="string"></slot>
  <slot name="DocType" type="string"></slot>
```

```
<slot name="PatientID" type="int">0</slot>
<slot name="DateObject" type="record"/>
<slot name="enddate" type="date">
<date day="24" month="10" year="1993"/>
</slot>
<slot name="_score_enddate" type="string"></slot>
<slot name="startdate" type="date">
<date day="24" month="10" year="1993"/>
</slot>
<slot name="_score_startdate" type="string"></slot>
<slot name="Patient" type="string"></slot>
<slot name="_score_Patient" type="string"></slot>
<slot name="_keyref" type="record"/>
<slot name="_score" type="string"></slot>
<slot name="_type" type="string"></slot>
</record>
<record id="11" template="HealthStatusRecord">
<slot name="ScoreType" type="string">HealthStatusRecord</slot>
<slot name="_score_ScoreType" type="string"></slot>
<slot name="source" type="string">C:\i2b2 eval\Subsets\Test\564.txt</slot>
<slot name="_score_source" type="string"></slot>
<slot name="region" type="region">
<region end="3636" start="3627">pain free</region>
</slot>
<slot name="_score_region" type="string"></slot>
```

<slot name="rule" type="string">HealthStatusItemPkg/0</slot>  
<slot name="ConceptName" type="string">ABSENCE OF PAIN</slot>  
<slot name="\_score\_ConceptName" type="string"></slot>  
<slot name="SemanticType" type="string">Sign or Symptom</slot>  
<slot name="BodyLocations" type="string">CHEST</slot>  
<slot name="\_score\_BodyLocations" type="string"></slot>  
<slot name="SeverityStrings" type="string"></slot>  
<slot name="UMLS\_CUI" type="string">C0234225</slot>  
<slot name="DaysBeforeDeath" type="int">0</slot>  
<slot name="PAIN" type="string">Y</slot>  
<slot name="MaxPain" type="int">3</slot>  
<slot name="SeverityScale" type="int">0</slot>  
<slot name="\_score\_SeverityScale" type="string"></slot>  
<slot name="polarity" type="string">POSITIVE</slot>  
<slot name="DocType" type="string"></slot>  
<slot name="PatientID" type="int">0</slot>  
<slot name="DateObject" type="record"/>  
<slot name="enddate" type="date">  
<date day="24" month="10" year="1993"/>  
</slot>  
<slot name="\_score\_enddate" type="string"></slot>  
<slot name="startdate" type="date">  
<date day="24" month="10" year="1993"/>  
</slot>  
<slot name="\_score\_startdate" type="string"></slot>

```
<slot name="Patient" type="string">PATIENT</slot>
<slot name="_score_Patient" type="string"></slot>
<slot name="_keyref" type="record"/>
<slot name="_score" type="string"></slot>
<slot name="_type" type="string"></slot>
</record>

<record id="12" template="HealthStatusRecord">
<slot name="ScoreType" type="string">HealthStatusRecord</slot>
<slot name="_score_ScoreType" type="string"></slot>
<slot name="source" type="string">C:\i2b2 eval\Subsets\Test\564.txt</slot>
<slot name="_score_source" type="string"></slot>
<slot name="region" type="region">
<region end="1108" start="1089">crushing chest pain</region>
</slot>
<slot name="_score_region" type="string"></slot>
<slot name="rule" type="string"></slot>
<slot name="ConceptName" type="string">CRUSHING CHEST PAIN</slot>
<slot name="_score_ConceptName" type="string"></slot>
<slot name="SemanticType" type="string"></slot>
<slot name="BodyLocations" type="string">CHEST</slot>
<slot name="_score_BodyLocations" type="string"></slot>
<slot name="SeverityStrings" type="string">CRUSHING</slot>
<slot name="UMLS_CUI" type="string"></slot>
<slot name="DaysBeforeDeath" type="int">0</slot>
<slot name="PAIN" type="string">Y</slot>
```

```
<slot name="MaxPain" type="int">0</slot>
<slot name="SeverityScale" type="int">3</slot>
<slot name="_score_SeverityScale" type="string"></slot>
<slot name="polarity" type="string"></slot>
<slot name="DocType" type="string"></slot>
<slot name="PatientID" type="int">0</slot>
<slot name="DateObject" type="record"/>
<slot name="enddate" type="date">
<date day="24" month="10" year="1993"/>
</slot>
<slot name="_score_enddate" type="string"></slot>
<slot name="startdate" type="date">
<date day="24" month="10" year="1993"/>
</slot>
<slot name="_score_startdate" type="string"></slot>
<slot name="Patient" type="string"></slot>
<slot name="_score_Patient" type="string"></slot>
<slot name="_keyref" type="record"/>
<slot name="_score" type="string"></slot>
<slot name="_type" type="string"></slot>
</record>
<record id="13" template="HealthStatusRecord">
<slot name="ScoreType" type="string">HealthStatusRecord</slot>
<slot name="_score_ScoreType" type="string">CORRECT</slot>
<slot name="source" type="string">C:\i2b2 eval\Subsets\Test\564.txt</slot>
```



<slot name="\_score\_source" type="string">CORRECT</slot>  
<slot name="region" type="region">  
<region end="1108" start="1089">crushing chest pain</region>  
</slot>  
<slot name="\_score\_region" type="string">CORRECT</slot>  
<slot name="rule" type="string">HealthStatusItemPkg/0</slot>  
<slot name="ConceptName" type="string">CRUSHING CHEST PAIN</slot>  
<slot name="\_score\_ConceptName" type="string">CORRECT</slot>  
<slot name="SemanticType" type="string">Sign or Symptom</slot>  
<slot name="BodyLocations" type="string"></slot>  
<slot name="\_score\_BodyLocations" type="string">MISSING</slot>  
<slot name="SeverityStrings" type="string"></slot>  
<slot name="UMLS\_CUI" type="string">C0232290</slot>  
<slot name="DaysBeforeDeath" type="int">0</slot>  
<slot name="PAIN" type="string">Y</slot>  
<slot name="MaxPain" type="int">3</slot>  
<slot name="SeverityScale" type="int">1</slot>  
<slot name="\_score\_SeverityScale" type="string">INCORRECT</slot>  
<slot name="polarity" type="string">POSITIVE</slot>  
<slot name="DocType" type="string"></slot>  
<slot name="PatientID" type="int">0</slot>  
<slot name="DateObject" type="record"/>  
<slot name="enddate" type="date">  
<date day="31" month="5" year="1993"/>  
</slot>

```
<slot name="_score_enddate" type="string">INCORRECT</slot>
<slot name="startdate" type="date">
<date day="1" month="5" year="1993"/>
</slot>
<slot name="_score_startdate" type="string">INCORRECT</slot>
<slot name="Patient" type="string">PATIENT</slot>
<slot name="_score_Patient" type="string">SPURIOUS</slot>
<slot name="_keyref" type="record">
<record ref="12"/>
</slot>
<slot name="_score" type="string">INCORRECT</slot>
<slot name="_type" type="string"></slot>
</record>
<record id="14" template="HealthStatusRecord">
<slot name="ScoreType" type="string">HealthStatusRecord</slot>
<slot name="_score_ScoreType" type="string"></slot>
<slot name="source" type="string">C:\i2b2 eval\Subsets\Test\564.txt</slot>
<slot name="_score_source" type="string"></slot>
<slot name="region" type="region">
<region end="3382" start="3361">substernal chest pain</region>
</slot>
<slot name="_score_region" type="string"></slot>
<slot name="rule" type="string">HealthStatusItemPkg/0</slot>
<slot name="ConceptName" type="string">RETROSTERNAL CHEST PAIN</slot>
<slot name="_score_ConceptName" type="string"></slot>
```

<slot name="SemanticType" type="string">Sign or Symptom</slot>  
<slot name="BodyLocations" type="string">STERNUM</slot>  
<slot name="\_score\_BodyLocations" type="string"></slot>  
<slot name="SeverityStrings" type="string">CRUSHING</slot>  
<slot name="UMLS\_CUI" type="string">C0151826</slot>  
<slot name="DaysBeforeDeath" type="int">0</slot>  
<slot name="PAIN" type="string">Y</slot>  
<slot name="MaxPain" type="int">3</slot>  
<slot name="SeverityScale" type="int">3</slot>  
<slot name="\_score\_SeverityScale" type="string"></slot>  
<slot name="polarity" type="string">POSITIVE</slot>  
<slot name="DocType" type="string"></slot>  
<slot name="PatientID" type="int">0</slot>  
<slot name="DateObject" type="record"/>  
<slot name="enddate" type="date">  
<date day="24" month="1" year="1993"/>  
</slot>  
<slot name="\_score\_enddate" type="string"></slot>  
<slot name="startdate" type="date">  
<date day="24" month="1" year="1993"/>  
</slot>  
<slot name="\_score\_startdate" type="string"></slot>  
<slot name="Patient" type="string">PATIENT</slot>  
<slot name="\_score\_Patient" type="string"></slot>  
<slot name="\_keyref" type="record"/>

```
<slot name="_score" type="string"></slot>
<slot name="_type" type="string"></slot>
</record>
<record id="15" template="HealthStatusRecord">
<slot name="ScoreType" type="string">HealthStatusRecord</slot>
<slot name="_score_ScoreType" type="string"></slot>
<slot name="source" type="string">C:\i2b2 eval\Subsets\Test\564.txt</slot>
<slot name="_score_source" type="string"></slot>
<slot name="region" type="region">
<region end="3382" start="3361">substernal chest pain</region>
</slot>
<slot name="_score_region" type="string"></slot>
<slot name="rule" type="string">HealthStatusItemPkg/0</slot>
<slot name="ConceptName" type="string">RETROSTERNAL CHEST PAIN</slot>
<slot name="_score_ConceptName" type="string"></slot>
<slot name="SemanticType" type="string">Sign or Symptom</slot>
<slot name="BodyLocations" type="string">STERNUM</slot>
<slot name="_score_BodyLocations" type="string"></slot>
<slot name="SeverityStrings" type="string">CRUSHING</slot>
<slot name="UMLS_CUI" type="string">C0151826</slot>
<slot name="DaysBeforeDeath" type="int">0</slot>
<slot name="PAIN" type="string">Y</slot>
<slot name="MaxPain" type="int">3</slot>
<slot name="SeverityScale" type="int">3</slot>
<slot name="_score_SeverityScale" type="string"></slot>
```

```
<slot name="polarity" type="string">POSITIVE</slot>
<slot name="DocType" type="string"></slot>
<slot name="PatientID" type="int">0</slot>
<slot name="DateObject" type="record"/>
<slot name="enddate" type="date">
<date day="24" month="1" year="1993"/>
</slot>
<slot name="_score_enddate" type="string"></slot>
<slot name="startdate" type="date">
<date day="24" month="1" year="1993"/>
</slot>
<slot name="_score_startdate" type="string"></slot>
<slot name="Patient" type="string">PATIENT</slot>
<slot name="_score_Patient" type="string"></slot>
<slot name="_keyref" type="record"/>
<slot name="_score" type="string"></slot>
<slot name="_type" type="string"></slot>
</record>
<record id="16" template="HealthStatusRecord">
<slot name="ScoreType" type="string">HealthStatusRecord</slot>
<slot name="_score_ScoreType" type="string">CORRECT</slot>
<slot name="source" type="string">C:\i2b2 eval\Subsets\Test\564.txt</slot>
<slot name="_score_source" type="string">CORRECT</slot>
<slot name="region" type="region">
<region end="3382" start="3361">substernal chest pain</region>
```

</slot>  
<slot name="\_score\_region" type="string">CORRECT</slot>  
<slot name="rule" type="string">HealthStatusItemPkg/0</slot>  
<slot name="ConceptName" type="string">RETROSTERNAL CHEST PAIN</slot>  
<slot name="\_score\_ConceptName" type="string">CORRECT</slot>  
<slot name="SemanticType" type="string">Sign or Symptom</slot>  
<slot name="BodyLocations" type="string">STERNUM</slot>  
<slot name="\_score\_BodyLocations" type="string">CORRECT</slot>  
<slot name="SeverityStrings" type="string">CRUSHING</slot>  
<slot name="UMLS\_CUI" type="string">C0151826</slot>  
<slot name="DaysBeforeDeath" type="int">0</slot>  
<slot name="PAIN" type="string">Y</slot>  
<slot name="MaxPain" type="int">3</slot>  
<slot name="SeverityScale" type="int">3</slot>  
<slot name="\_score\_SeverityScale" type="string">CORRECT</slot>  
<slot name="polarity" type="string">POSITIVE</slot>  
<slot name="DocType" type="string"></slot>  
<slot name="PatientID" type="int">0</slot>  
<slot name="DateObject" type="record"/>  
<slot name="enddate" type="date">  
<date day="24" month="10" year="1993"/>  
</slot>  
<slot name="\_score\_enddate" type="string">INCORRECT</slot>  
<slot name="startdate" type="date">  
<date day="24" month="10" year="1993"/>

```
</slot>
<slot name="_score_startdate" type="string">INCORRECT</slot>
<slot name="Patient" type="string">PATIENT</slot>
<slot name="_score_Patient" type="string">CORRECT</slot>
<slot name="_keyref" type="record">
<record ref="15"/>
</slot>
<slot name="_score" type="string">INCORRECT</slot>
<slot name="_type" type="string"></slot>
</record>
<record id="17" template="HealthStatusRecord">
<slot name="ScoreType" type="string">HealthStatusRecord</slot>
<slot name="_score_ScoreType" type="string"></slot>
<slot name="source" type="string">C:\i2b2 eval\Subsets\Test\564.txt</slot>
<slot name="_score_source" type="string"></slot>
<slot name="region" type="region">
<region end="994" start="973">substernal chest pain</region>
</slot>
<slot name="_score_region" type="string"></slot>
<slot name="rule" type="string">HealthStatusItemPkg/0</slot>
<slot name="ConceptName" type="string">RETROSTERNAL CHEST PAIN</slot>
<slot name="_score_ConceptName" type="string"></slot>
<slot name="SemanticType" type="string">Sign or Symptom</slot>
<slot name="BodyLocations" type="string">STERNUM</slot>
<slot name="_score_BodyLocations" type="string"></slot>
```

```
<slot name="SeverityStrings" type="string">CRUSHING</slot>
<slot name="UMLS_CUI" type="string">C0151826</slot>
<slot name="DaysBeforeDeath" type="int">0</slot>
<slot name="PAIN" type="string">Y</slot>
<slot name="MaxPain" type="int">3</slot>
<slot name="SeverityScale" type="int">3</slot>
<slot name="_score_SeverityScale" type="string"></slot>
<slot name="polarity" type="string">POSITIVE</slot>
<slot name="DocType" type="string"></slot>
<slot name="PatientID" type="int">0</slot>
<slot name="DateObject" type="record"/>
<slot name="enddate" type="date">
<date day="24" month="10" year="1993"/>
</slot>
<slot name="_score_enddate" type="string"></slot>
<slot name="startdate" type="date">
<date day="24" month="10" year="1993"/>
</slot>
<slot name="_score_startdate" type="string"></slot>
<slot name="Patient" type="string">PATIENT</slot>
<slot name="_score_Patient" type="string"></slot>
<slot name="_keyref" type="record"/>
<slot name="_score" type="string"></slot>
<slot name="_type" type="string"></slot>
</record>
```



```
</records>
</infStore>
<?xml version="1.0" encoding="UTF-8"?>
<infStore>
<records>
<record id="0" template="HealthStatusRecord">
<slot name="ScoreType" type="string">HealthStatusRecord</slot>
<slot name="_score_ScoreType" type="string"></slot>
<slot name="source" type="string">C:\i2b2 eval\Subsets\Test\565.txt</slot>
<slot name="_score_source" type="string"></slot>
<slot name="region" type="region">
<region end="827" start="818">back pain</region>
</slot>
<slot name="_score_region" type="string"></slot>
<slot name="rule" type="string">HealthStatusItemPkg/0</slot>
<slot name="ConceptName" type="string">BACK PAINS</slot>
<slot name="_score_ConceptName" type="string"></slot>
<slot name="SemanticType" type="string">Sign or Symptom</slot>
<slot name="BodyLocations" type="string">BACK</slot>
<slot name="_score_BodyLocations" type="string"></slot>
<slot name="SeverityStrings" type="string"></slot>
<slot name="UMLS_CUI" type="string">C0004604</slot>
<slot name="DaysBeforeDeath" type="int">0</slot>
<slot name="PAIN" type="string">Y</slot>
<slot name="MaxPain" type="int">3</slot>
```

```
<slot name="SeverityScale" type="int">1</slot>
<slot name="_score_SeverityScale" type="string"></slot>
<slot name="polarity" type="string">POSITIVE</slot>
<slot name="DocType" type="string"></slot>
<slot name="PatientID" type="int">0</slot>
<slot name="DateObject" type="record"/>
<slot name="enddate" type="date">
<date day="29" month="7" year="1993"/>
</slot>
<slot name="_score_enddate" type="string"></slot>
<slot name="startdate" type="date">
<date day="29" month="7" year="1993"/>
</slot>
<slot name="_score_startdate" type="string"></slot>
<slot name="Patient" type="string">PATIENT</slot>
<slot name="_score_Patient" type="string"></slot>
<slot name="_keyref" type="record"/>
<slot name="_score" type="string"></slot>
<slot name="_type" type="string"></slot>
</record>
<record id="1" template="HealthStatusRecord">
<slot name="ScoreType" type="string">HealthStatusRecord</slot>
<slot name="_score_ScoreType" type="string">CORRECT</slot>
<slot name="source" type="string">C:\i2b2 eval\Subsets\Test\565.txt</slot>
<slot name="_score_source" type="string">CORRECT</slot>
```

<slot name="region" type="region">  
<region end="827" start="818">back pain</region>  
</slot>  
<slot name="\_score\_region" type="string">CORRECT</slot>  
<slot name="rule" type="string">HealthStatusItemPkg/0</slot>  
<slot name="ConceptName" type="string">BACK PAINS</slot>  
<slot name="\_score\_ConceptName" type="string">CORRECT</slot>  
<slot name="SemanticType" type="string">Sign or Symptom</slot>  
<slot name="BodyLocations" type="string">BACK</slot>  
<slot name="\_score\_BodyLocations" type="string">CORRECT</slot>  
<slot name="SeverityStrings" type="string"></slot>  
<slot name="UMLS\_CUI" type="string">C0004604</slot>  
<slot name="DaysBeforeDeath" type="int">0</slot>  
<slot name="PAIN" type="string">Y</slot>  
<slot name="MaxPain" type="int">3</slot>  
<slot name="SeverityScale" type="int">1</slot>  
<slot name="\_score\_SeverityScale" type="string">CORRECT</slot>  
<slot name="polarity" type="string">POSITIVE</slot>  
<slot name="DocType" type="string"></slot>  
<slot name="PatientID" type="int">0</slot>  
<slot name="DateObject" type="record"/>  
<slot name="enddate" type="date">  
<date day="30" month="7" year="1993"/>  
</slot>  
<slot name="\_score\_enddate" type="string">INCORRECT</slot>

```
<slot name="startdate" type="date">
<date day="30" month="7" year="1993"/>
</slot>
<slot name="_score_startdate" type="string">INCORRECT</slot>
<slot name="Patient" type="string">PATIENT</slot>
<slot name="_score_Patient" type="string">CORRECT</slot>
<slot name="_keyref" type="record">
<record ref="0"/>
</slot>
<slot name="_score" type="string">INCORRECT</slot>
<slot name="_type" type="string"></slot>
</record>
<record id="2" template="HealthStatusRecord">
<slot name="ScoreType" type="string">HealthStatusRecord</slot>
<slot name="_score_ScoreType" type="string"></slot>
<slot name="source" type="string">C:\i2b2 eval\Subsets\Test\565.txt</slot>
<slot name="_score_source" type="string"></slot>
<slot name="region" type="region">
<region end="5208" start="5198">chest pain</region>
</slot>
<slot name="_score_region" type="string"></slot>
<slot name="rule" type="string">HealthStatusItemPkg/0</slot>
<slot name="ConceptName" type="string">CHEST PAIN UNSPECIFIED</slot>
<slot name="_score_ConceptName" type="string"></slot>
<slot name="SemanticType" type="string">Sign or Symptom</slot>
```

<slot name="BodyLocations" type="string">CHEST</slot>  
<slot name="\_score\_BodyLocations" type="string"></slot>  
<slot name="SeverityStrings" type="string">RECURRENT</slot>  
<slot name="UMLS\_CUI" type="string">C1535568</slot>  
<slot name="DaysBeforeDeath" type="int">0</slot>  
<slot name="PAIN" type="string">Y</slot>  
<slot name="MaxPain" type="int">3</slot>  
<slot name="SeverityScale" type="int">0</slot>  
<slot name="\_score\_SeverityScale" type="string"></slot>  
<slot name="polarity" type="string">POSITIVE</slot>  
<slot name="DocType" type="string"></slot>  
<slot name="PatientID" type="int">0</slot>  
<slot name="DateObject" type="record"/>  
<slot name="enddate" type="date">  
<date day="9" month="8" year="1993"/>  
</slot>  
<slot name="\_score\_enddate" type="string"></slot>  
<slot name="startdate" type="date">  
<date day="4" month="8" year="1993"/>  
</slot>  
<slot name="\_score\_startdate" type="string"></slot>  
<slot name="Patient" type="string">PATIENT</slot>  
<slot name="\_score\_Patient" type="string"></slot>  
<slot name="\_keyref" type="record"/>  
<slot name="\_score" type="string"></slot>

```
<slot name="_type" type="string"></slot>
</record>
<record id="3" template="HealthStatusRecord">
<slot name="ScoreType" type="string">HealthStatusRecord</slot>
<slot name="_score_ScoreType" type="string">CORRECT</slot>
<slot name="source" type="string">C:\i2b2 eval\Subsets\Test\565.txt</slot>
<slot name="_score_source" type="string">CORRECT</slot>
<slot name="region" type="region">
<region end="5208" start="5198">chest pain</region>
</slot>
<slot name="_score_region" type="string">CORRECT</slot>
<slot name="rule" type="string">HealthStatusItemPkg/0</slot>
<slot name="ConceptName" type="string">CHEST PAIN</slot>
<slot name="_score_ConceptName" type="string">INCORRECT</slot>
<slot name="SemanticType" type="string">Sign or Symptom</slot>
<slot name="BodyLocations" type="string">CHEST</slot>
<slot name="_score_BodyLocations" type="string">CORRECT</slot>
<slot name="SeverityStrings" type="string">RECURRENT</slot>
<slot name="UMLS_CUI" type="string">C0008031</slot>
<slot name="DaysBeforeDeath" type="int">0</slot>
<slot name="PAIN" type="string">Y</slot>
<slot name="MaxPain" type="int">3</slot>
<slot name="SeverityScale" type="int">1</slot>
<slot name="_score_SeverityScale" type="string">INCORRECT</slot>
<slot name="polarity" type="string">POSITIVE</slot>
```

```
<slot name="DocType" type="string"></slot>
<slot name="PatientID" type="int">0</slot>
<slot name="DateObject" type="record"/>
<slot name="enddate" type="date">
<date day="30" month="7" year="1993"/>
</slot>
<slot name="_score_enddate" type="string">INCORRECT</slot>
<slot name="startdate" type="date">
<date day="30" month="7" year="1993"/>
</slot>
<slot name="_score_startdate" type="string">INCORRECT</slot>
<slot name="Patient" type="string">PATIENT</slot>
<slot name="_score_Patient" type="string">CORRECT</slot>
<slot name="_keyref" type="record">
<record ref="2"/>
</slot>
<slot name="_score" type="string">INCORRECT</slot>
<slot name="_type" type="string"></slot>
</record>
<record id="4" template="HealthStatusRecord">
<slot name="ScoreType" type="string">HealthStatusRecord</slot>
<slot name="_score_ScoreType" type="string"></slot>
<slot name="source" type="string">C:\i2b2 eval\Subsets\Test\565.txt</slot>
<slot name="_score_source" type="string"></slot>
<slot name="region" type="region">
```

<region end="5809" start="5799">chest pain</region>  
</slot>  
<slot name="\_score\_region" type="string"></slot>  
<slot name="rule" type="string">HealthStatusItemPkg/0</slot>  
<slot name="ConceptName" type="string">CHEST PAIN UNSPECIFIED</slot>  
<slot name="\_score\_ConceptName" type="string"></slot>  
<slot name="SemanticType" type="string">Sign or Symptom</slot>  
<slot name="BodyLocations" type="string">CHEST</slot>  
<slot name="\_score\_BodyLocations" type="string"></slot>  
<slot name="SeverityStrings" type="string">NOT</slot>  
<slot name="UMLS\_CUI" type="string">C1535568</slot>  
<slot name="DaysBeforeDeath" type="int">0</slot>  
<slot name="PAIN" type="string">Y</slot>  
<slot name="MaxPain" type="int">3</slot>  
<slot name="SeverityScale" type="int">0</slot>  
<slot name="\_score\_SeverityScale" type="string"></slot>  
<slot name="polarity" type="string">POSITIVE</slot>  
<slot name="DocType" type="string"></slot>  
<slot name="PatientID" type="int">0</slot>  
<slot name="DateObject" type="record"/>  
<slot name="enddate" type="date">  
<date day="8" month="8" year="1993"/>  
</slot>  
<slot name="\_score\_enddate" type="string"></slot>  
<slot name="startdate" type="date">



```
<date day="8" month="8" year="1993"/>
</slot>
<slot name="_score_startdate" type="string"></slot>
<slot name="Patient" type="string">PATIENT</slot>
<slot name="_score_Patient" type="string"></slot>
<slot name="_keyref" type="record"/>
<slot name="_score" type="string"></slot>
<slot name="_type" type="string"></slot>
</record>
<record id="5" template="HealthStatusRecord">
<slot name="ScoreType" type="string">HealthStatusRecord</slot>
<slot name="_score_ScoreType" type="string">CORRECT</slot>
<slot name="source" type="string">C:\i2b2 eval\Subsets\Test\565.txt</slot>
<slot name="_score_source" type="string">CORRECT</slot>
<slot name="region" type="region">
<region end="5809" start="5799">chest pain</region>
</slot>
<slot name="_score_region" type="string">CORRECT</slot>
<slot name="rule" type="string">HealthStatusItemPkg/0</slot>
<slot name="ConceptName" type="string">CHEST PAIN</slot>
<slot name="_score_ConceptName" type="string">INCORRECT</slot>
<slot name="SemanticType" type="string">Sign or Symptom</slot>
<slot name="BodyLocations" type="string">CHEST</slot>
<slot name="_score_BodyLocations" type="string">CORRECT</slot>
<slot name="SeverityStrings" type="string">NOT</slot>
```

<slot name="UMLS\_CUI" type="string">C0008031</slot>  
<slot name="DaysBeforeDeath" type="int">0</slot>  
<slot name="PAIN" type="string">Y</slot>  
<slot name="MaxPain" type="int">3</slot>  
<slot name="SeverityScale" type="int">0</slot>  
<slot name="\_score\_SeverityScale" type="string">CORRECT</slot>  
<slot name="polarity" type="string">POSITIVE</slot>  
<slot name="DocType" type="string"></slot>  
<slot name="PatientID" type="int">0</slot>  
<slot name="DateObject" type="record"/>  
<slot name="enddate" type="date">  
<date day="30" month="7" year="1993"/>  
</slot>  
<slot name="\_score\_enddate" type="string">INCORRECT</slot>  
<slot name="startdate" type="date">  
<date day="30" month="7" year="1993"/>  
</slot>  
<slot name="\_score\_startdate" type="string">INCORRECT</slot>  
<slot name="Patient" type="string">PATIENT</slot>  
<slot name="\_score\_Patient" type="string">CORRECT</slot>  
<slot name="\_keyref" type="record">  
<record ref="4"/>  
</slot>  
<slot name="\_score" type="string">INCORRECT</slot>  
<slot name="\_type" type="string"></slot>

```
</record>
<record id="6" template="HealthStatusRecord">
<slot name="ScoreType" type="string">HealthStatusRecord</slot>
<slot name="_score_ScoreType" type="string"></slot>
<slot name="source" type="string">C:\i2b2 eval\Subsets\Test\565.txt</slot>
<slot name="_score_source" type="string"></slot>
<slot name="region" type="region">
<region end="774" start="753">substernal chest pain</region>
</slot>
<slot name="_score_region" type="string"></slot>
<slot name="rule" type="string">HealthStatusItemPkg/0</slot>
<slot name="ConceptName" type="string">RETROSTERNAL CHEST PAIN</slot>
<slot name="_score_ConceptName" type="string"></slot>
<slot name="SemanticType" type="string">Sign or Symptom</slot>
<slot name="BodyLocations" type="string">STERNUM</slot>
<slot name="_score_BodyLocations" type="string"></slot>
<slot name="SeverityStrings" type="string">SEVERE</slot>
<slot name="UMLS_CUI" type="string">C0151826</slot>
<slot name="DaysBeforeDeath" type="int">0</slot>
<slot name="PAIN" type="string">Y</slot>
<slot name="MaxPain" type="int">3</slot>
<slot name="SeverityScale" type="int">3</slot>
<slot name="_score_SeverityScale" type="string"></slot>
<slot name="polarity" type="string">POSITIVE</slot>
<slot name="DocType" type="string"></slot>
```

```
<slot name="PatientID" type="int">0</slot>
<slot name="DateObject" type="record"/>
<slot name="enddate" type="date">
<date day="29" month="7" year="1993"/>
</slot>
<slot name="_score_enddate" type="string"></slot>
<slot name="startdate" type="date">
<date day="29" month="7" year="1993"/>
</slot>
<slot name="_score_startdate" type="string"></slot>
<slot name="Patient" type="string">PATIENT</slot>
<slot name="_score_Patient" type="string"></slot>
<slot name="_keyref" type="record"/>
<slot name="_score" type="string"></slot>
<slot name="_type" type="string"></slot>
</record>
<record id="7" template="HealthStatusRecord">
<slot name="ScoreType" type="string">HealthStatusRecord</slot>
<slot name="_score_ScoreType" type="string">CORRECT</slot>
<slot name="source" type="string">C:\i2b2 eval\Subsets\Test\565.txt</slot>
<slot name="_score_source" type="string">CORRECT</slot>
<slot name="region" type="region">
<region end="774" start="753">substernal chest pain</region>
</slot>
<slot name="_score_region" type="string">CORRECT</slot>
```

<slot name="rule" type="string">HealthStatusItemPkg/0</slot>  
<slot name="ConceptName" type="string">RETROSTERNAL CHEST PAIN</slot>  
<slot name="\_score\_ConceptName" type="string">CORRECT</slot>  
<slot name="SemanticType" type="string">Sign or Symptom</slot>  
<slot name="BodyLocations" type="string">STERNUM</slot>  
<slot name="\_score\_BodyLocations" type="string">CORRECT</slot>  
<slot name="SeverityStrings" type="string">SEVERE</slot>  
<slot name="UMLS\_CUI" type="string">C0151826</slot>  
<slot name="DaysBeforeDeath" type="int">0</slot>  
<slot name="PAIN" type="string">Y</slot>  
<slot name="MaxPain" type="int">3</slot>  
<slot name="SeverityScale" type="int">3</slot>  
<slot name="\_score\_SeverityScale" type="string">CORRECT</slot>  
<slot name="polarity" type="string">POSITIVE</slot>  
<slot name="DocType" type="string"></slot>  
<slot name="PatientID" type="int">0</slot>  
<slot name="DateObject" type="record"/>  
<slot name="enddate" type="date">  
<date day="30" month="7" year="1993"/>  
</slot>  
<slot name="\_score\_enddate" type="string">INCORRECT</slot>  
<slot name="startdate" type="date">  
<date day="30" month="7" year="1993"/>  
</slot>  
<slot name="\_score\_startdate" type="string">INCORRECT</slot>

```
<slot name="Patient" type="string">PATIENT</slot>
<slot name="_score_Patient" type="string">CORRECT</slot>
<slot name="_keyref" type="record">
<record ref="6"/>
</slot>
<slot name="_score" type="string">INCORRECT</slot>
<slot name="_type" type="string"></slot>
</record>
<record id="8" template="HealthStatusRecord">
<slot name="ScoreType" type="string">HealthStatusRecord</slot>
<slot name="_score_ScoreType" type="string"></slot>
<slot name="source" type="string">C:\i2b2 eval\Subsets\Test\565.txt</slot>
<slot name="_score_source" type="string"></slot>
<slot name="region" type="region">
<region end="643" start="633">chest pain</region>
</slot>
<slot name="_score_region" type="string"></slot>
<slot name="rule" type="string">HealthStatusItemPkg/0</slot>
<slot name="ConceptName" type="string">CHEST PAIN UNSPECIFIED</slot>
<slot name="_score_ConceptName" type="string"></slot>
<slot name="SemanticType" type="string">Sign or Symptom</slot>
<slot name="BodyLocations" type="string">CHEST</slot>
<slot name="_score_BodyLocations" type="string"></slot>
<slot name="SeverityStrings" type="string">INTERMITTENT</slot>
<slot name="UMLS_CUI" type="string">C1535568</slot>
```

```
<slot name="DaysBeforeDeath" type="int">0</slot>
<slot name="PAIN" type="string">Y</slot>
<slot name="MaxPain" type="int">3</slot>
<slot name="SeverityScale" type="int">1</slot>
<slot name="_score_SeverityScale" type="string"></slot>
<slot name="polarity" type="string">POSITIVE</slot>
<slot name="DocType" type="string"></slot>
<slot name="PatientID" type="int">0</slot>
<slot name="DateObject" type="record"/>
<slot name="enddate" type="date">
<date day="30" month="7" year="1993"/>
</slot>
<slot name="_score_enddate" type="string"></slot>
<slot name="startdate" type="date">
<date day="23" month="7" year="1993"/>
</slot>
<slot name="_score_startdate" type="string"></slot>
<slot name="Patient" type="string">PATIENT</slot>
<slot name="_score_Patient" type="string"></slot>
<slot name="_keyref" type="record"/>
<slot name="_score" type="string"></slot>
<slot name="_type" type="string"></slot>
</record>
<record id="9" template="HealthStatusRecord">
<slot name="ScoreType" type="string">HealthStatusRecord</slot>
```

<slot name="\_score\_ScoreType" type="string">CORRECT</slot>  
<slot name="source" type="string">C:\i2b2 eval\Subsets\Test\565.txt</slot>  
<slot name="\_score\_source" type="string">CORRECT</slot>  
<slot name="region" type="region">  
<region end="643" start="633">chest pain</region>  
</slot>  
<slot name="\_score\_region" type="string">CORRECT</slot>  
<slot name="rule" type="string">HealthStatusItemPkg/0</slot>  
<slot name="ConceptName" type="string">CHEST PAIN</slot>  
<slot name="\_score\_ConceptName" type="string">INCORRECT</slot>  
<slot name="SemanticType" type="string">Sign or Symptom</slot>  
<slot name="BodyLocations" type="string">CHEST</slot>  
<slot name="\_score\_BodyLocations" type="string">CORRECT</slot>  
<slot name="SeverityStrings" type="string">INTERMITTENT</slot>  
<slot name="UMLS\_CUI" type="string">C0008031</slot>  
<slot name="DaysBeforeDeath" type="int">0</slot>  
<slot name="PAIN" type="string">Y</slot>  
<slot name="MaxPain" type="int">3</slot>  
<slot name="SeverityScale" type="int">1</slot>  
<slot name="\_score\_SeverityScale" type="string">CORRECT</slot>  
<slot name="polarity" type="string">POSITIVE</slot>  
<slot name="DocType" type="string"></slot>  
<slot name="PatientID" type="int">0</slot>  
<slot name="DateObject" type="record"/>  
<slot name="enddate" type="date">



```
<date day="30" month="7" year="1993"/>
</slot>
<slot name="_score_enddate" type="string">CORRECT</slot>
<slot name="startdate" type="date">
<date day="30" month="7" year="1993"/>
</slot>
<slot name="_score_startdate" type="string">INCORRECT</slot>
<slot name="Patient" type="string">PATIENT</slot>
<slot name="_score_Patient" type="string">CORRECT</slot>
<slot name="_keyref" type="record">
<record ref="8"/>
</slot>
<slot name="_score" type="string">INCORRECT</slot>
<slot name="_type" type="string"></slot>
</record>
<record id="10" template="HealthStatusRecord">
<slot name="ScoreType" type="string">HealthStatusRecord</slot>
<slot name="_score_ScoreType" type="string"></slot>
<slot name="source" type="string">C:\i2b2 eval\Subsets\Test\565.txt</slot>
<slot name="_score_source" type="string"></slot>
<slot name="region" type="region">
<region end="774" start="753">substernal chest pain</region>
</slot>
<slot name="_score_region" type="string"></slot>
<slot name="rule" type="string">HealthStatusItemPkg/0</slot>
```

<slot name="ConceptName" type="string">RETROSTERNAL CHEST PAIN</slot>  
<slot name="\_score\_ConceptName" type="string"></slot>  
<slot name="SemanticType" type="string">Sign or Symptom</slot>  
<slot name="BodyLocations" type="string">STERNUM</slot>  
<slot name="\_score\_BodyLocations" type="string"></slot>  
<slot name="SeverityStrings" type="string">SEVERE</slot>  
<slot name="UMLS\_CUI" type="string">C0151826</slot>  
<slot name="DaysBeforeDeath" type="int">0</slot>  
<slot name="PAIN" type="string">Y</slot>  
<slot name="MaxPain" type="int">3</slot>  
<slot name="SeverityScale" type="int">3</slot>  
<slot name="\_score\_SeverityScale" type="string"></slot>  
<slot name="polarity" type="string">POSITIVE</slot>  
<slot name="DocType" type="string"></slot>  
<slot name="PatientID" type="int">0</slot>  
<slot name="DateObject" type="record"/>  
<slot name="enddate" type="date">  
<date day="29" month="7" year="1993"/>  
</slot>  
<slot name="\_score\_enddate" type="string"></slot>  
<slot name="startdate" type="date">  
<date day="29" month="7" year="1993"/>  
</slot>  
<slot name="\_score\_startdate" type="string"></slot>  
<slot name="Patient" type="string">PATIENT</slot>

```
<slot name="_score_Patient" type="string"></slot>
<slot name="_keyref" type="record"/>
<slot name="_score" type="string"></slot>
<slot name="_type" type="string"></slot>
</record>
<record id="11" template="HealthStatusRecord">
<slot name="ScoreType" type="string">HealthStatusRecord</slot>
<slot name="_score_ScoreType" type="string"></slot>
<slot name="source" type="string">C:\i2b2 eval\Subsets\Test\565.txt</slot>
<slot name="_score_source" type="string"></slot>
<slot name="region" type="region">
<region end="827" start="818">back pain</region>
</slot>
<slot name="_score_region" type="string"></slot>
<slot name="rule" type="string">HealthStatusItemPkg/0</slot>
<slot name="ConceptName" type="string">BACK PAINS</slot>
<slot name="_score_ConceptName" type="string"></slot>
<slot name="SemanticType" type="string">Sign or Symptom</slot>
<slot name="BodyLocations" type="string">BACK</slot>
<slot name="_score_BodyLocations" type="string"></slot>
<slot name="SeverityStrings" type="string"></slot>
<slot name="UMLS_CUI" type="string">C0004604</slot>
<slot name="DaysBeforeDeath" type="int">0</slot>
<slot name="PAIN" type="string">Y</slot>
<slot name="MaxPain" type="int">3</slot>
```

```
<slot name="SeverityScale" type="int">1</slot>
<slot name="_score_SeverityScale" type="string"></slot>
<slot name="polarity" type="string">POSITIVE</slot>
<slot name="DocType" type="string"></slot>
<slot name="PatientID" type="int">0</slot>
<slot name="DateObject" type="record"/>
<slot name="enddate" type="date">
<date day="29" month="7" year="1993"/>
</slot>
<slot name="_score_enddate" type="string"></slot>
<slot name="startdate" type="date">
<date day="29" month="7" year="1993"/>
</slot>
<slot name="_score_startdate" type="string"></slot>
<slot name="Patient" type="string">PATIENT</slot>
<slot name="_score_Patient" type="string"></slot>
<slot name="_keyref" type="record"/>
<slot name="_score" type="string"></slot>
<slot name="_type" type="string"></slot>
</record>
<record id="12" template="HealthStatusRecord">
<slot name="ScoreType" type="string">HealthStatusRecord</slot>
<slot name="_score_ScoreType" type="string"></slot>
<slot name="source" type="string">C:\i2b2 eval\Subsets\Test\565.txt</slot>
<slot name="_score_source" type="string"></slot>
```

```
<slot name="region" type="region">
<region end="5208" start="5198">chest pain</region>
</slot>
<slot name="_score_region" type="string"></slot>
<slot name="rule" type="string">HealthStatusItemPkg/0</slot>
<slot name="ConceptName" type="string">CHEST PAIN UNSPECIFIED</slot>
<slot name="_score_ConceptName" type="string"></slot>
<slot name="SemanticType" type="string">Sign or Symptom</slot>
<slot name="BodyLocations" type="string">CHEST</slot>
<slot name="_score_BodyLocations" type="string"></slot>
<slot name="SeverityStrings" type="string">RECURRENT</slot>
<slot name="UMLS_CUI" type="string">C1535568</slot>
<slot name="DaysBeforeDeath" type="int">0</slot>
<slot name="PAIN" type="string">Y</slot>
<slot name="MaxPain" type="int">3</slot>
<slot name="SeverityScale" type="int">0</slot>
<slot name="_score_SeverityScale" type="string"></slot>
<slot name="polarity" type="string">POSITIVE</slot>
<slot name="DocType" type="string"></slot>
<slot name="PatientID" type="int">0</slot>
<slot name="DateObject" type="record"/>
<slot name="enddate" type="date">
<date day="9" month="8" year="1993"/>
</slot>
<slot name="_score_enddate" type="string"></slot>
```

```
<slot name="startdate" type="date">
<date day="4" month="8" year="1993"/>
</slot>
<slot name="_score_startdate" type="string"></slot>
<slot name="Patient" type="string">PATIENT</slot>
<slot name="_score_Patient" type="string"></slot>
<slot name="_keyref" type="record"/>
<slot name="_score" type="string"></slot>
<slot name="_type" type="string"></slot>
</record>
<record id="13" template="HealthStatusRecord">
<slot name="ScoreType" type="string">HealthStatusRecord</slot>
<slot name="_score_ScoreType" type="string"></slot>
<slot name="source" type="string">C:\i2b2 eval\Subsets\Test\565.txt</slot>
<slot name="_score_source" type="string"></slot>
<slot name="region" type="region">
<region end="5809" start="5799">chest pain</region>
</slot>
<slot name="_score_region" type="string"></slot>
<slot name="rule" type="string">HealthStatusItemPkg/0</slot>
<slot name="ConceptName" type="string">CHEST PAIN UNSPECIFIED</slot>
<slot name="_score_ConceptName" type="string"></slot>
<slot name="SemanticType" type="string">Sign or Symptom</slot>
<slot name="BodyLocations" type="string">CHEST</slot>
<slot name="_score_BodyLocations" type="string"></slot>
```

```
<slot name="SeverityStrings" type="string">NOT</slot>
<slot name="UMLS_CUI" type="string">C1535568</slot>
<slot name="DaysBeforeDeath" type="int">0</slot>
<slot name="PAIN" type="string">Y</slot>
<slot name="MaxPain" type="int">3</slot>
<slot name="SeverityScale" type="int">0</slot>
<slot name="_score_SeverityScale" type="string"></slot>
<slot name="polarity" type="string">POSITIVE</slot>
<slot name="DocType" type="string"></slot>
<slot name="PatientID" type="int">0</slot>
<slot name="DateObject" type="record"/>
<slot name="enddate" type="date">
<date day="8" month="8" year="1993"/>
</slot>
<slot name="_score_enddate" type="string"></slot>
<slot name="startdate" type="date">
<date day="8" month="8" year="1993"/>
</slot>
<slot name="_score_startdate" type="string"></slot>
<slot name="Patient" type="string">PATIENT</slot>
<slot name="_score_Patient" type="string"></slot>
<slot name="_keyref" type="record"/>
<slot name="_score" type="string"></slot>
<slot name="_type" type="string"></slot>
</record>
```

```
<record id="14" template="HealthStatusRecord">
  <slot name="ScoreType" type="string">HealthStatusRecord</slot>
  <slot name="_score_ScoreType" type="string"></slot>
  <slot name="source" type="string">C:\i2b2 eval\Subsets\Test\565.txt</slot>
  <slot name="_score_source" type="string"></slot>
  <slot name="region" type="region">
    <region end="643" start="633">chest pain</region>
  </slot>
  <slot name="_score_region" type="string"></slot>
  <slot name="rule" type="string">HealthStatusItemPkg/0</slot>
  <slot name="ConceptName" type="string">CHEST PAIN UNSPECIFIED</slot>
  <slot name="_score_ConceptName" type="string"></slot>
  <slot name="SemanticType" type="string">Sign or Symptom</slot>
  <slot name="BodyLocations" type="string">CHEST</slot>
  <slot name="_score_BodyLocations" type="string"></slot>
  <slot name="SeverityStrings" type="string">INTERMITTENT</slot>
  <slot name="UMLS_CUI" type="string">C1535568</slot>
  <slot name="DaysBeforeDeath" type="int">0</slot>
  <slot name="PAIN" type="string">Y</slot>
  <slot name="MaxPain" type="int">3</slot>
  <slot name="SeverityScale" type="int">1</slot>
  <slot name="_score_SeverityScale" type="string"></slot>
  <slot name="polarity" type="string">POSITIVE</slot>
  <slot name="DocType" type="string"></slot>
  <slot name="PatientID" type="int">0</slot>
```



```
<slot name="DateObject" type="record"/>
<slot name="enddate" type="date">
<date day="30" month="7" year="1993"/>
</slot>
<slot name="_score_enddate" type="string"></slot>
<slot name="startdate" type="date">
<date day="23" month="7" year="1993"/>
</slot>
<slot name="_score_startdate" type="string"></slot>
<slot name="Patient" type="string">PATIENT</slot>
<slot name="_score_Patient" type="string"></slot>
<slot name="_keyref" type="record"/>
<slot name="_score" type="string"></slot>
<slot name="_type" type="string"></slot>
</record>
</records>
</infStore>
<?xml version="1.0" encoding="UTF-8"?>
<infStore>
<records>
<record id="0" template="HealthStatusRecord">
<slot name="ScoreType" type="string">HealthStatusRecord</slot>
<slot name="_score_ScoreType" type="string"></slot>
<slot name="source" type="string">C:\i2b2 eval\Subsets\Test\600.txt</slot>
<slot name="_score_source" type="string"></slot>
```

```
<slot name="region" type="region">
<region end="2572" start="2565">dysuria</region>
</slot>
<slot name="_score_region" type="string"></slot>
<slot name="rule" type="string">HealthStatusItemPkg/0</slot>
<slot name="ConceptName" type="string">DYSURIA</slot>
<slot name="_score_ConceptName" type="string"></slot>
<slot name="SemanticType" type="string">Sign or Symptom</slot>
<slot name="BodyLocations" type="string">URETHRA</slot>
<slot name="_score_BodyLocations" type="string"></slot>
<slot name="SeverityStrings" type="string"></slot>
<slot name="UMLS_CUI" type="string">C0013428</slot>
<slot name="DaysBeforeDeath" type="int">0</slot>
<slot name="PAIN" type="string">Y</slot>
<slot name="MaxPain" type="int">1</slot>
<slot name="SeverityScale" type="int">0</slot>
<slot name="_score_SeverityScale" type="string"></slot>
<slot name="polarity" type="string">POSITIVE</slot>
<slot name="DocType" type="string"></slot>
<slot name="PatientID" type="int">0</slot>
<slot name="DateObject" type="record"/>
<slot name="enddate" type="date">
<date day="4" month="8" year="1998"/>
</slot>
<slot name="_score_enddate" type="string"></slot>
```

```
<slot name="startdate" type="date">
<date day="4" month="8" year="1998"/>
</slot>
<slot name="_score_startdate" type="string"></slot>
<slot name="Patient" type="string">PATIENT</slot>
<slot name="_score_Patient" type="string"></slot>
<slot name="_keyref" type="record"/>
<slot name="_score" type="string"></slot>
<slot name="_type" type="string"></slot>
</record>
<record id="1" template="HealthStatusRecord">
<slot name="ScoreType" type="string">HealthStatusRecord</slot>
<slot name="_score_ScoreType" type="string">CORRECT</slot>
<slot name="source" type="string">C:\i2b2 eval\Subsets\Test\600.txt</slot>
<slot name="_score_source" type="string">CORRECT</slot>
<slot name="region" type="region">
<region end="2572" start="2565">dysuria</region>
</slot>
<slot name="_score_region" type="string">CORRECT</slot>
<slot name="rule" type="string">HealthStatusItemPkg/0</slot>
<slot name="ConceptName" type="string">DYSURIA</slot>
<slot name="_score_ConceptName" type="string">CORRECT</slot>
<slot name="SemanticType" type="string">Sign or Symptom</slot>
<slot name="BodyLocations" type="string"></slot>
<slot name="_score_BodyLocations" type="string">MISSING</slot>
```

<slot name="SeverityStrings" type="string">NO</slot>  
<slot name="UMLS\_CUI" type="string">C0013428</slot>  
<slot name="DaysBeforeDeath" type="int">0</slot>  
<slot name="PAIN" type="string">Y</slot>  
<slot name="MaxPain" type="int">1</slot>  
<slot name="SeverityScale" type="int">0</slot>  
<slot name="\_score\_SeverityScale" type="string">CORRECT</slot>  
<slot name="polarity" type="string">POSITIVE</slot>  
<slot name="DocType" type="string"></slot>  
<slot name="PatientID" type="int">0</slot>  
<slot name="DateObject" type="record"/>  
<slot name="enddate" type="date">  
<date day="4" month="8" year="1998"/>  
</slot>  
<slot name="\_score\_enddate" type="string">CORRECT</slot>  
<slot name="startdate" type="date">  
<date day="4" month="8" year="1998"/>  
</slot>  
<slot name="\_score\_startdate" type="string">CORRECT</slot>  
<slot name="Patient" type="string">PATIENT</slot>  
<slot name="\_score\_Patient" type="string">CORRECT</slot>  
<slot name="\_keyref" type="record">  
<record ref="0"/>  
</slot>  
<slot name="\_score" type="string">INCORRECT</slot>

```
<slot name="_type" type="string"></slot>
</record>
<record id="2" template="HealthStatusRecord">
<slot name="ScoreType" type="string">HealthStatusRecord</slot>
<slot name="_score_ScoreType" type="string"></slot>
<slot name="source" type="string">C:\i2b2 eval\Subsets\Test\600.txt</slot>
<slot name="_score_source" type="string"></slot>
<slot name="region" type="region">
<region end="2440" start="2430">chest pain</region>
</slot>
<slot name="_score_region" type="string"></slot>
<slot name="rule" type="string">HealthStatusItemPkg/0</slot>
<slot name="ConceptName" type="string">CHEST PAIN UNSPECIFIED</slot>
<slot name="_score_ConceptName" type="string"></slot>
<slot name="SemanticType" type="string">Sign or Symptom</slot>
<slot name="BodyLocations" type="string">CHEST</slot>
<slot name="_score_BodyLocations" type="string"></slot>
<slot name="SeverityStrings" type="string">DENIED</slot>
<slot name="UMLS_CUI" type="string">C1535568</slot>
<slot name="DaysBeforeDeath" type="int">0</slot>
<slot name="PAIN" type="string">Y</slot>
<slot name="MaxPain" type="int">1</slot>
<slot name="SeverityScale" type="int">0</slot>
<slot name="_score_SeverityScale" type="string"></slot>
<slot name="polarity" type="string">POSITIVE</slot>
```

```
<slot name="DocType" type="string"></slot>
<slot name="PatientID" type="int">0</slot>
<slot name="DateObject" type="record"/>
<slot name="enddate" type="date">
<date day="4" month="8" year="1998"/>
</slot>
<slot name="_score_enddate" type="string"></slot>
<slot name="startdate" type="date">
<date day="4" month="8" year="1998"/>
</slot>
<slot name="_score_startdate" type="string"></slot>
<slot name="Patient" type="string">PATIENT</slot>
<slot name="_score_Patient" type="string"></slot>
<slot name="_keyref" type="record"/>
<slot name="_score" type="string"></slot>
<slot name="_type" type="string"></slot>
</record>
<record id="3" template="HealthStatusRecord">
<slot name="ScoreType" type="string">HealthStatusRecord</slot>
<slot name="_score_ScoreType" type="string">CORRECT</slot>
<slot name="source" type="string">C:\i2b2 eval\Subsets\Test\600.txt</slot>
<slot name="_score_source" type="string">CORRECT</slot>
<slot name="region" type="region">
<region end="2440" start="2430">chest pain</region>
</slot>
```

<slot name="\_score\_region" type="string">CORRECT</slot>  
<slot name="rule" type="string">HealthStatusItemPkg/0</slot>  
<slot name="ConceptName" type="string">CHEST PAIN</slot>  
<slot name="\_score\_ConceptName" type="string">INCORRECT</slot>  
<slot name="SemanticType" type="string">Sign or Symptom</slot>  
<slot name="BodyLocations" type="string">CHEST</slot>  
<slot name="\_score\_BodyLocations" type="string">CORRECT</slot>  
<slot name="SeverityStrings" type="string">NO</slot>  
<slot name="UMLS\_CUI" type="string">C0008031</slot>  
<slot name="DaysBeforeDeath" type="int">0</slot>  
<slot name="PAIN" type="string">Y</slot>  
<slot name="MaxPain" type="int">1</slot>  
<slot name="SeverityScale" type="int">0</slot>  
<slot name="\_score\_SeverityScale" type="string">CORRECT</slot>  
<slot name="polarity" type="string">POSITIVE</slot>  
<slot name="DocType" type="string"></slot>  
<slot name="PatientID" type="int">0</slot>  
<slot name="DateObject" type="record"/>  
<slot name="enddate" type="date">  
<date day="4" month="8" year="1998"/>  
</slot>  
<slot name="\_score\_enddate" type="string">CORRECT</slot>  
<slot name="startdate" type="date">  
<date day="4" month="8" year="1998"/>  
</slot>

```
<slot name="_score_startdate" type="string">CORRECT</slot>
<slot name="Patient" type="string">PATIENT</slot>
<slot name="_score_Patient" type="string">CORRECT</slot>
<slot name="_keyref" type="record">
<record ref="2"/>
</slot>
<slot name="_score" type="string">INCORRECT</slot>
<slot name="_type" type="string"></slot>
</record>
<record id="4" template="HealthStatusRecord">
<slot name="ScoreType" type="string">HealthStatusRecord</slot>
<slot name="_score_ScoreType" type="string"></slot>
<slot name="source" type="string">C:\i2b2 eval\Subsets\Test\600.txt</slot>
<slot name="_score_source" type="string"></slot>
<slot name="region" type="region">
<region end="2440" start="2430">chest pain</region>
</slot>
<slot name="_score_region" type="string"></slot>
<slot name="rule" type="string">HealthStatusItemPkg/0</slot>
<slot name="ConceptName" type="string">CHEST PAIN UNSPECIFIED</slot>
<slot name="_score_ConceptName" type="string"></slot>
<slot name="SemanticType" type="string">Sign or Symptom</slot>
<slot name="BodyLocations" type="string">CHEST</slot>
<slot name="_score_BodyLocations" type="string"></slot>
<slot name="SeverityStrings" type="string">DENIED</slot>
```



```
<slot name="UMLS_CUI" type="string">C1535568</slot>
<slot name="DaysBeforeDeath" type="int">0</slot>
<slot name="PAIN" type="string">Y</slot>
<slot name="MaxPain" type="int">1</slot>
<slot name="SeverityScale" type="int">0</slot>
<slot name="_score_SeverityScale" type="string"></slot>
<slot name="polarity" type="string">POSITIVE</slot>
<slot name="DocType" type="string"></slot>
<slot name="PatientID" type="int">0</slot>
<slot name="DateObject" type="record"/>
<slot name="enddate" type="date">
<date day="4" month="8" year="1998"/>
</slot>
<slot name="_score_enddate" type="string"></slot>
<slot name="startdate" type="date">
<date day="4" month="8" year="1998"/>
</slot>
<slot name="_score_startdate" type="string"></slot>
<slot name="Patient" type="string">PATIENT</slot>
<slot name="_score_Patient" type="string"></slot>
<slot name="_keyref" type="record"/>
<slot name="_score" type="string"></slot>
<slot name="_type" type="string"></slot>
</record>
<record id="5" template="HealthStatusRecord">
```

<slot name="ScoreType" type="string">HealthStatusRecord</slot>  
<slot name="\_score\_ScoreType" type="string"></slot>  
<slot name="source" type="string">C:\i2b2 eval\Subsets\Test\600.txt</slot>  
<slot name="\_score\_source" type="string"></slot>  
<slot name="region" type="region">  
<region end="2572" start="2565">dysuria</region>  
</slot>  
<slot name="\_score\_region" type="string"></slot>  
<slot name="rule" type="string">HealthStatusItemPkg/0</slot>  
<slot name="ConceptName" type="string">DYSURIA</slot>  
<slot name="\_score\_ConceptName" type="string"></slot>  
<slot name="SemanticType" type="string">Sign or Symptom</slot>  
<slot name="BodyLocations" type="string">URETHRA</slot>  
<slot name="\_score\_BodyLocations" type="string"></slot>  
<slot name="SeverityStrings" type="string"></slot>  
<slot name="UMLS\_CUI" type="string">C0013428</slot>  
<slot name="DaysBeforeDeath" type="int">0</slot>  
<slot name="PAIN" type="string">Y</slot>  
<slot name="MaxPain" type="int">1</slot>  
<slot name="SeverityScale" type="int">0</slot>  
<slot name="\_score\_SeverityScale" type="string"></slot>  
<slot name="polarity" type="string">POSITIVE</slot>  
<slot name="DocType" type="string"></slot>  
<slot name="PatientID" type="int">0</slot>  
<slot name="DateObject" type="record"/>

```
<slot name="enddate" type="date">
<date day="4" month="8" year="1998"/>
</slot>
<slot name="_score_enddate" type="string"></slot>
<slot name="startdate" type="date">
<date day="4" month="8" year="1998"/>
</slot>
<slot name="_score_startdate" type="string"></slot>
<slot name="Patient" type="string">PATIENT</slot>
<slot name="_score_Patient" type="string"></slot>
<slot name="_keyref" type="record"/>
<slot name="_score" type="string"></slot>
<slot name="_type" type="string"></slot>
</record>
<record id="6" template="HealthStatusRecord">
<slot name="ScoreType" type="string">HealthStatusRecord</slot>
<slot name="_score_ScoreType" type="string">CORRECT</slot>
<slot name="source" type="string">C:\i2b2 eval\Subsets\Test\600.txt</slot>
<slot name="_score_source" type="string">CORRECT</slot>
<slot name="region" type="region">
<region end="1781" start="1777">pain</region>
</slot>
<slot name="_score_region" type="string">CORRECT</slot>
<slot name="rule" type="string">HealthStatusItemPkg/0</slot>
<slot name="ConceptName" type="string">PAIN</slot>
```

<slot name="\_score\_ConceptName" type="string">CORRECT</slot>  
<slot name="SemanticType" type="string">Sign or Symptom</slot>  
<slot name="BodyLocations" type="string"></slot>  
<slot name="\_score\_BodyLocations" type="string"></slot>  
<slot name="SeverityStrings" type="string"></slot>  
<slot name="UMLS\_CUI" type="string">C0030193</slot>  
<slot name="DaysBeforeDeath" type="int">0</slot>  
<slot name="PAIN" type="string">Y</slot>  
<slot name="MaxPain" type="int">1</slot>  
<slot name="SeverityScale" type="int">1</slot>  
<slot name="\_score\_SeverityScale" type="string">CORRECT</slot>  
<slot name="polarity" type="string">POSITIVE</slot>  
<slot name="DocType" type="string"></slot>  
<slot name="PatientID" type="int">0</slot>  
<slot name="DateObject" type="record"/>  
<slot name="enddate" type="date">  
<date day="4" month="8" year="1998"/>  
</slot>  
<slot name="\_score\_enddate" type="string">CORRECT</slot>  
<slot name="startdate" type="date">  
<date day="4" month="8" year="1998"/>  
</slot>  
<slot name="\_score\_startdate" type="string">CORRECT</slot>  
<slot name="Patient" type="string">PATIENT</slot>  
<slot name="\_score\_Patient" type="string">CORRECT</slot>

```
<slot name="_keyref" type="record"/>
<slot name="_score" type="string">CORRECT</slot>
<slot name="_type" type="string"></slot>
</record>
</records>
</infStore>
<?xml version="1.0" encoding="UTF-8"?>
<infStore>
<records>
<record id="0" template="HealthStatusRecord">
<slot name="ScoreType" type="string">HealthStatusRecord</slot>
<slot name="_score_ScoreType" type="string"></slot>
<slot name="source" type="string">C:\i2b2 eval\Subsets\Test\603.txt</slot>
<slot name="_score_source" type="string"></slot>
<slot name="region" type="region">
<region end="602" start="588">right hip pain</region>
</slot>
<slot name="_score_region" type="string"></slot>
<slot name="rule" type="string">HealthStatusItemPkg/0</slot>
<slot name="ConceptName" type="string">RIGHT HIP JOINT PAIN</slot>
<slot name="_score_ConceptName" type="string"></slot>
<slot name="SemanticType" type="string">Sign or Symptom</slot>
<slot name="BodyLocations" type="string">HIP</slot>
<slot name="_score_BodyLocations" type="string"></slot>
<slot name="SeverityStrings" type="string"></slot>
```

```
<slot name="UMLS_CUI" type="string">C2202100</slot>
<slot name="DaysBeforeDeath" type="int">0</slot>
<slot name="PAIN" type="string">Y</slot>
<slot name="MaxPain" type="int">1</slot>
<slot name="SeverityScale" type="int">1</slot>
<slot name="_score_SeverityScale" type="string"></slot>
<slot name="polarity" type="string">POSITIVE</slot>
<slot name="DocType" type="string"></slot>
<slot name="PatientID" type="int">0</slot>
<slot name="DateObject" type="record"/>
<slot name="enddate" type="date">
<date day="11" month="3" year="1998"/>
</slot>
<slot name="_score_enddate" type="string"></slot>
<slot name="startdate" type="date">
<date day="11" month="3" year="1998"/>
</slot>
<slot name="_score_startdate" type="string"></slot>
<slot name="Patient" type="string">PATIENT</slot>
<slot name="_score_Patient" type="string"></slot>
<slot name="_keyref" type="record"/>
<slot name="_score" type="string"></slot>
<slot name="_type" type="string"></slot>
</record>
<record id="1" template="HealthStatusRecord">
```

<slot name="ScoreType" type="string">HealthStatusRecord</slot>  
<slot name="\_score\_ScoreType" type="string"></slot>  
<slot name="source" type="string">C:\i2b2 eval\Subsets\Test\603.txt</slot>  
<slot name="\_score\_source" type="string"></slot>  
<slot name="region" type="region">  
<region end="2198" start="2194">pain</region>  
</slot>  
<slot name="\_score\_region" type="string"></slot>  
<slot name="rule" type="string">HealthStatusItemPkg/0</slot>  
<slot name="ConceptName" type="string">PAIN</slot>  
<slot name="\_score\_ConceptName" type="string"></slot>  
<slot name="SemanticType" type="string">Sign or Symptom</slot>  
<slot name="BodyLocations" type="string">HIP</slot>  
<slot name="\_score\_BodyLocations" type="string"></slot>  
<slot name="SeverityStrings" type="string"></slot>  
<slot name="UMLS\_CUI" type="string">C0030193</slot>  
<slot name="DaysBeforeDeath" type="int">0</slot>  
<slot name="PAIN" type="string">Y</slot>  
<slot name="MaxPain" type="int">1</slot>  
<slot name="SeverityScale" type="int">1</slot>  
<slot name="\_score\_SeverityScale" type="string"></slot>  
<slot name="polarity" type="string">POSITIVE</slot>  
<slot name="DocType" type="string"></slot>  
<slot name="PatientID" type="int">0</slot>  
<slot name="DateObject" type="record"/>

```
<slot name="enddate" type="date">
<date day="11" month="3" year="1998"/>
</slot>
<slot name="_score_enddate" type="string"></slot>
<slot name="startdate" type="date">
<date day="11" month="3" year="1998"/>
</slot>
<slot name="_score_startdate" type="string"></slot>
<slot name="Patient" type="string">PATIENT</slot>
<slot name="_score_Patient" type="string"></slot>
<slot name="_keyref" type="record"/>
<slot name="_score" type="string"></slot>
<slot name="_type" type="string"></slot>
</record>
<record id="2" template="HealthStatusRecord">
<slot name="ScoreType" type="string">HealthStatusRecord</slot>
<slot name="_score_ScoreType" type="string"></slot>
<slot name="source" type="string">C:\i2b2 eval\Subsets\Test\603.txt</slot>
<slot name="_score_source" type="string"></slot>
<slot name="region" type="region">
<region end="602" start="588">right hip pain</region>
</slot>
<slot name="_score_region" type="string"></slot>
<slot name="rule" type="string">HealthStatusItemPkg/0</slot>
<slot name="ConceptName" type="string">RIGHT HIP JOINT PAIN</slot>
```



<slot name="\_score\_ConceptName" type="string"></slot>  
<slot name="SemanticType" type="string">Sign or Symptom</slot>  
<slot name="BodyLocations" type="string">HIP</slot>  
<slot name="\_score\_BodyLocations" type="string"></slot>  
<slot name="SeverityStrings" type="string"></slot>  
<slot name="UMLS\_CUI" type="string">C2202100</slot>  
<slot name="DaysBeforeDeath" type="int">0</slot>  
<slot name="PAIN" type="string">Y</slot>  
<slot name="MaxPain" type="int">1</slot>  
<slot name="SeverityScale" type="int">1</slot>  
<slot name="\_score\_SeverityScale" type="string"></slot>  
<slot name="polarity" type="string">POSITIVE</slot>  
<slot name="DocType" type="string"></slot>  
<slot name="PatientID" type="int">0</slot>  
<slot name="DateObject" type="record"/>  
<slot name="enddate" type="date">  
<date day="11" month="3" year="1998"/>  
</slot>  
<slot name="\_score\_enddate" type="string"></slot>  
<slot name="startdate" type="date">  
<date day="11" month="3" year="1998"/>  
</slot>  
<slot name="\_score\_startdate" type="string"></slot>  
<slot name="Patient" type="string">PATIENT</slot>  
<slot name="\_score\_Patient" type="string"></slot>

```
<slot name="_keyref" type="record"/>
<slot name="_score" type="string"></slot>
<slot name="_type" type="string"></slot>
</record>
<record id="3" template="HealthStatusRecord">
<slot name="ScoreType" type="string">HealthStatusRecord</slot>
<slot name="_score_ScoreType" type="string">CORRECT</slot>
<slot name="source" type="string">C:\i2b2 eval\Subsets\Test\603.txt</slot>
<slot name="_score_source" type="string">CORRECT</slot>
<slot name="region" type="region">
<region end="602" start="588">right hip pain</region>
</slot>
<slot name="_score_region" type="string">CORRECT</slot>
<slot name="rule" type="string">HealthStatusItemPkg/0</slot>
<slot name="ConceptName" type="string">RIGHT HIP JOINT PAIN</slot>
<slot name="_score_ConceptName" type="string">CORRECT</slot>
<slot name="SemanticType" type="string">Sign or Symptom</slot>
<slot name="BodyLocations" type="string"></slot>
<slot name="_score_BodyLocations" type="string">MISSING</slot>
<slot name="SeverityStrings" type="string"></slot>
<slot name="UMLS_CUI" type="string">C2202100</slot>
<slot name="DaysBeforeDeath" type="int">0</slot>
<slot name="PAIN" type="string">Y</slot>
<slot name="MaxPain" type="int">1</slot>
<slot name="SeverityScale" type="int">1</slot>
```

```
<slot name="_score_SeverityScale" type="string">CORRECT</slot>
<slot name="polarity" type="string">POSITIVE</slot>
<slot name="DocType" type="string"></slot>
<slot name="PatientID" type="int">0</slot>
<slot name="DateObject" type="record"/>
<slot name="enddate" type="date">
<date day="11" month="3" year="1998"/>
</slot>
<slot name="_score_enddate" type="string">CORRECT</slot>
<slot name="startdate" type="date">
<date day="11" month="3" year="1998"/>
</slot>
<slot name="_score_startdate" type="string">CORRECT</slot>
<slot name="Patient" type="string">PATIENT</slot>
<slot name="_score_Patient" type="string">CORRECT</slot>
<slot name="_keyref" type="record">
<record ref="2"/>
</slot>
<slot name="_score" type="string">INCORRECT</slot>
<slot name="_type" type="string"></slot>
</record>
<record id="4" template="HealthStatusRecord">
<slot name="ScoreType" type="string">HealthStatusRecord</slot>
<slot name="_score_ScoreType" type="string"></slot>
<slot name="source" type="string">C:\i2b2 eval\Subsets\Test\603.txt</slot>
```

<slot name="\_score\_source" type="string"></slot>  
<slot name="region" type="region">  
<region end="2198" start="2194">pain</region>  
</slot>  
<slot name="\_score\_region" type="string"></slot>  
<slot name="rule" type="string">HealthStatusItemPkg/0</slot>  
<slot name="ConceptName" type="string">PAIN</slot>  
<slot name="\_score\_ConceptName" type="string"></slot>  
<slot name="SemanticType" type="string">Sign or Symptom</slot>  
<slot name="BodyLocations" type="string">HIP</slot>  
<slot name="\_score\_BodyLocations" type="string"></slot>  
<slot name="SeverityStrings" type="string"></slot>  
<slot name="UMLS\_CUI" type="string">C0030193</slot>  
<slot name="DaysBeforeDeath" type="int">0</slot>  
<slot name="PAIN" type="string">Y</slot>  
<slot name="MaxPain" type="int">1</slot>  
<slot name="SeverityScale" type="int">1</slot>  
<slot name="\_score\_SeverityScale" type="string"></slot>  
<slot name="polarity" type="string">POSITIVE</slot>  
<slot name="DocType" type="string"></slot>  
<slot name="PatientID" type="int">0</slot>  
<slot name="DateObject" type="record"/>  
<slot name="enddate" type="date">  
<date day="11" month="3" year="1998"/>  
</slot>

```
<slot name="_score_enddate" type="string"></slot>
<slot name="startdate" type="date">
<date day="11" month="3" year="1998"/>
</slot>
<slot name="_score_startdate" type="string"></slot>
<slot name="Patient" type="string">PATIENT</slot>
<slot name="_score_Patient" type="string"></slot>
<slot name="_keyref" type="record"/>
<slot name="_score" type="string"></slot>
<slot name="_type" type="string"></slot>
</record>
<record id="5" template="HealthStatusRecord">
<slot name="ScoreType" type="string">HealthStatusRecord</slot>
<slot name="_score_ScoreType" type="string">CORRECT</slot>
<slot name="source" type="string">C:\i2b2 eval\Subsets\Test\603.txt</slot>
<slot name="_score_source" type="string">CORRECT</slot>
<slot name="region" type="region">
<region end="2198" start="2194">pain</region>
</slot>
<slot name="_score_region" type="string">CORRECT</slot>
<slot name="rule" type="string">HealthStatusItemPkg/0</slot>
<slot name="ConceptName" type="string">PAIN</slot>
<slot name="_score_ConceptName" type="string">CORRECT</slot>
<slot name="SemanticType" type="string">Sign or Symptom</slot>
<slot name="BodyLocations" type="string"></slot>
```

<slot name="\_score\_BodyLocations" type="string">MISSING</slot>  
<slot name="SeverityStrings" type="string"></slot>  
<slot name="UMLS\_CUI" type="string">C0030193</slot>  
<slot name="DaysBeforeDeath" type="int">0</slot>  
<slot name="PAIN" type="string">Y</slot>  
<slot name="MaxPain" type="int">1</slot>  
<slot name="SeverityScale" type="int">1</slot>  
<slot name="\_score\_SeverityScale" type="string">CORRECT</slot>  
<slot name="polarity" type="string">POSITIVE</slot>  
<slot name="DocType" type="string"></slot>  
<slot name="PatientID" type="int">0</slot>  
<slot name="DateObject" type="record"/>  
<slot name="enddate" type="date">  
<date day="11" month="3" year="1998"/>  
</slot>  
<slot name="\_score\_enddate" type="string">CORRECT</slot>  
<slot name="startdate" type="date">  
<date day="11" month="3" year="1998"/>  
</slot>  
<slot name="\_score\_startdate" type="string">CORRECT</slot>  
<slot name="Patient" type="string">PATIENT</slot>  
<slot name="\_score\_Patient" type="string">CORRECT</slot>  
<slot name="\_keyref" type="record">  
<record ref="4"/>  
</slot>

```
<slot name="_score" type="string">INCORRECT</slot>
<slot name="_type" type="string"></slot>
</record>
</records>
</infStore>
<?xml version="1.0" encoding="UTF-8"?>
<infStore>
<records>
<record id="0" template="HealthStatusRecord">
<slot name="ScoreType" type="string">HealthStatusRecord</slot>
<slot name="_score_ScoreType" type="string"></slot>
<slot name="source" type="string">C:\i2b2 eval\Subsets\Test\604.txt</slot>
<slot name="_score_source" type="string"></slot>
<slot name="region" type="region">
<region end="4261" start="4257">pain</region>
</slot>
<slot name="_score_region" type="string"></slot>
<slot name="rule" type="string">HealthStatusItemPkg/0</slot>
<slot name="ConceptName" type="string">PAIN</slot>
<slot name="_score_ConceptName" type="string"></slot>
<slot name="SemanticType" type="string">Sign or Symptom</slot>
<slot name="BodyLocations" type="string">MUCOUS MEMBRANES</slot>
<slot name="_score_BodyLocations" type="string"></slot>
<slot name="SeverityStrings" type="string"></slot>
<slot name="UMLS_CUI" type="string">C0030193</slot>
```

```
<slot name="DaysBeforeDeath" type="int">0</slot>
<slot name="PAIN" type="string">Y</slot>
<slot name="MaxPain" type="int">1</slot>
<slot name="SeverityScale" type="int">1</slot>
<slot name="_score_SeverityScale" type="string"></slot>
<slot name="polarity" type="string">POSITIVE</slot>
<slot name="DocType" type="string"></slot>
<slot name="PatientID" type="int">0</slot>
<slot name="DateObject" type="record"/>
<slot name="enddate" type="date">
<date day="17" month="11" year="2000"/>
</slot>
<slot name="_score_enddate" type="string"></slot>
<slot name="startdate" type="date">
<date day="29" month="10" year="2000"/>
</slot>
<slot name="_score_startdate" type="string"></slot>
<slot name="Patient" type="string">PATIENT</slot>
<slot name="_score_Patient" type="string"></slot>
<slot name="_keyref" type="record"/>
<slot name="_score" type="string"></slot>
<slot name="_type" type="string"></slot>
</record>
<record id="1" template="HealthStatusRecord">
<slot name="ScoreType" type="string">HealthStatusRecord</slot>
```



<slot name="\_score\_ScoreType" type="string"></slot>  
<slot name="source" type="string">C:\i2b2 eval\Subsets\Test\604.txt</slot>  
<slot name="\_score\_source" type="string"></slot>  
<slot name="region" type="region">  
<region end="2716" start="2712">pain</region>  
</slot>  
<slot name="\_score\_region" type="string"></slot>  
<slot name="rule" type="string">HealthStatusItemPkg/0</slot>  
<slot name="ConceptName" type="string">ABDOMINAL PAIN</slot>  
<slot name="\_score\_ConceptName" type="string"></slot>  
<slot name="SemanticType" type="string">Sign or Symptom</slot>  
<slot name="BodyLocations" type="string">ABDOMEN</slot>  
<slot name="\_score\_BodyLocations" type="string"></slot>  
<slot name="SeverityStrings" type="string"></slot>  
<slot name="UMLS\_CUI" type="string">C0000737</slot>  
<slot name="DaysBeforeDeath" type="int">0</slot>  
<slot name="PAIN" type="string">Y</slot>  
<slot name="MaxPain" type="int">1</slot>  
<slot name="SeverityScale" type="int">0</slot>  
<slot name="\_score\_SeverityScale" type="string"></slot>  
<slot name="polarity" type="string">POSITIVE</slot>  
<slot name="DocType" type="string"></slot>  
<slot name="PatientID" type="int">0</slot>  
<slot name="DateObject" type="record"/>  
<slot name="enddate" type="date">

```
<date day="22" month="10" year="2000"/>
</slot>
<slot name="_score_enddate" type="string"></slot>
<slot name="startdate" type="date">
<date day="22" month="10" year="2000"/>
</slot>
<slot name="_score_startdate" type="string"></slot>
<slot name="Patient" type="string">PATIENT</slot>
<slot name="_score_Patient" type="string"></slot>
<slot name="_keyref" type="record"/>
<slot name="_score" type="string"></slot>
<slot name="_type" type="string"></slot>
</record>
<record id="2" template="HealthStatusRecord">
<slot name="ScoreType" type="string">HealthStatusRecord</slot>
<slot name="_score_ScoreType" type="string">CORRECT</slot>
<slot name="source" type="string">C:\i2b2 eval\Subsets\Test\604.txt</slot>
<slot name="_score_source" type="string">CORRECT</slot>
<slot name="region" type="region">
<region end="2716" start="2712">pain</region>
</slot>
<slot name="_score_region" type="string">CORRECT</slot>
<slot name="rule" type="string">HealthStatusItemPkg/0</slot>
<slot name="ConceptName" type="string">PAIN</slot>
<slot name="_score_ConceptName" type="string">INCORRECT</slot>
```

<slot name="SemanticType" type="string">Sign or Symptom</slot>  
<slot name="BodyLocations" type="string">ABDOMEN</slot>  
<slot name="\_score\_BodyLocations" type="string">CORRECT</slot>  
<slot name="SeverityStrings" type="string"></slot>  
<slot name="UMLS\_CUI" type="string">C0030193</slot>  
<slot name="DaysBeforeDeath" type="int">0</slot>  
<slot name="PAIN" type="string">Y</slot>  
<slot name="MaxPain" type="int">1</slot>  
<slot name="SeverityScale" type="int">1</slot>  
<slot name="\_score\_SeverityScale" type="string">INCORRECT</slot>  
<slot name="polarity" type="string">POSITIVE</slot>  
<slot name="DocType" type="string"></slot>  
<slot name="PatientID" type="int">0</slot>  
<slot name="DateObject" type="record"/>  
<slot name="enddate" type="date">  
<date day="22" month="10" year="2000"/>  
</slot>  
<slot name="\_score\_enddate" type="string">CORRECT</slot>  
<slot name="startdate" type="date">  
<date day="22" month="10" year="2000"/>  
</slot>  
<slot name="\_score\_startdate" type="string">CORRECT</slot>  
<slot name="Patient" type="string">PATIENT</slot>  
<slot name="\_score\_Patient" type="string">CORRECT</slot>  
<slot name="\_keyref" type="record">

```
<record ref="1"/>
</slot>
<slot name="_score" type="string">INCORRECT</slot>
<slot name="_type" type="string"></slot>
</record>
<record id="3" template="HealthStatusRecord">
<slot name="ScoreType" type="string">HealthStatusRecord</slot>
<slot name="_score_ScoreType" type="string"></slot>
<slot name="source" type="string">C:\i2b2 eval\Subsets\Test\604.txt</slot>
<slot name="_score_source" type="string"></slot>
<slot name="region" type="region">
<region end="2632" start="2622">chest pain</region>
</slot>
<slot name="_score_region" type="string"></slot>
<slot name="rule" type="string">HealthStatusItemPkg/0</slot>
<slot name="ConceptName" type="string">CHEST PAIN UNSPECIFIED</slot>
<slot name="_score_ConceptName" type="string"></slot>
<slot name="SemanticType" type="string">Sign or Symptom</slot>
<slot name="BodyLocations" type="string">CHEST</slot>
<slot name="_score_BodyLocations" type="string"></slot>
<slot name="SeverityStrings" type="string"></slot>
<slot name="UMLS_CUI" type="string">C1535568</slot>
<slot name="DaysBeforeDeath" type="int">0</slot>
<slot name="PAIN" type="string">Y</slot>
<slot name="MaxPain" type="int">1</slot>
```

```
<slot name="SeverityScale" type="int">0</slot>
<slot name="_score_SeverityScale" type="string"></slot>
<slot name="polarity" type="string">POSITIVE</slot>
<slot name="DocType" type="string"></slot>
<slot name="PatientID" type="int">0</slot>
<slot name="DateObject" type="record"/>
<slot name="enddate" type="date">
<date day="22" month="10" year="2000"/>
</slot>
<slot name="_score_enddate" type="string"></slot>
<slot name="startdate" type="date">
<date day="22" month="10" year="2000"/>
</slot>
<slot name="_score_startdate" type="string"></slot>
<slot name="Patient" type="string">PATIENT</slot>
<slot name="_score_Patient" type="string"></slot>
<slot name="_keyref" type="record"/>
<slot name="_score" type="string"></slot>
<slot name="_type" type="string"></slot>
</record>
<record id="4" template="HealthStatusRecord">
<slot name="ScoreType" type="string">HealthStatusRecord</slot>
<slot name="_score_ScoreType" type="string">CORRECT</slot>
<slot name="source" type="string">C:\i2b2 eval\Subsets\Test\604.txt</slot>
<slot name="_score_source" type="string">CORRECT</slot>
```

<slot name="region" type="region">  
<region end="2632" start="2622">chest pain</region>  
</slot>  
<slot name="\_score\_region" type="string">CORRECT</slot>  
<slot name="rule" type="string">HealthStatusItemPkg/0</slot>  
<slot name="ConceptName" type="string">CHEST PAIN</slot>  
<slot name="\_score\_ConceptName" type="string">INCORRECT</slot>  
<slot name="SemanticType" type="string">Sign or Symptom</slot>  
<slot name="BodyLocations" type="string">CHEST</slot>  
<slot name="\_score\_BodyLocations" type="string">CORRECT</slot>  
<slot name="SeverityStrings" type="string"></slot>  
<slot name="UMLS\_CUI" type="string">C0008031</slot>  
<slot name="DaysBeforeDeath" type="int">0</slot>  
<slot name="PAIN" type="string">Y</slot>  
<slot name="MaxPain" type="int">1</slot>  
<slot name="SeverityScale" type="int">1</slot>  
<slot name="\_score\_SeverityScale" type="string">INCORRECT</slot>  
<slot name="polarity" type="string">POSITIVE</slot>  
<slot name="DocType" type="string"></slot>  
<slot name="PatientID" type="int">0</slot>  
<slot name="DateObject" type="record"/>  
<slot name="enddate" type="date">  
<date day="22" month="10" year="2000"/>  
</slot>  
<slot name="\_score\_enddate" type="string">CORRECT</slot>

```
<slot name="startdate" type="date">
<date day="22" month="10" year="2000"/>
</slot>
<slot name="_score_startdate" type="string">CORRECT</slot>
<slot name="Patient" type="string">PATIENT</slot>
<slot name="_score_Patient" type="string">CORRECT</slot>
<slot name="_keyref" type="record">
<record ref="3"/>
</slot>
<slot name="_score" type="string">INCORRECT</slot>
<slot name="_type" type="string"></slot>
</record>
<record id="5" template="HealthStatusRecord">
<slot name="ScoreType" type="string">HealthStatusRecord</slot>
<slot name="_score_ScoreType" type="string">SPURIOUS</slot>
<slot name="source" type="string">C:\i2b2 eval\Subsets\Test\604.txt</slot>
<slot name="_score_source" type="string">SPURIOUS</slot>
<slot name="region" type="region">
<region end="2757" start="2739">frequent headaches</region>
</slot>
<slot name="_score_region" type="string">SPURIOUS</slot>
<slot name="rule" type="string">HealthStatusItemPkg/0</slot>
<slot name="ConceptName" type="string">FREQUENT HEADACHES</slot>
<slot name="_score_ConceptName" type="string">SPURIOUS</slot>
<slot name="SemanticType" type="string">Sign or Symptom</slot>
```

<slot name="BodyLocations" type="string">HEAD</slot>  
<slot name="\_score\_BodyLocations" type="string">SPURIOUS</slot>  
<slot name="SeverityStrings" type="string"></slot>  
<slot name="UMLS\_CUI" type="string">C0948396</slot>  
<slot name="DaysBeforeDeath" type="int">0</slot>  
<slot name="PAIN" type="string">Y</slot>  
<slot name="MaxPain" type="int">1</slot>  
<slot name="SeverityScale" type="int">1</slot>  
<slot name="\_score\_SeverityScale" type="string">SPURIOUS</slot>  
<slot name="polarity" type="string">POSITIVE</slot>  
<slot name="DocType" type="string"></slot>  
<slot name="PatientID" type="int">0</slot>  
<slot name="DateObject" type="record"/>  
<slot name="enddate" type="date">  
<date day="22" month="10" year="2000"/>  
</slot>  
<slot name="\_score\_enddate" type="string">SPURIOUS</slot>  
<slot name="startdate" type="date">  
<date day="22" month="10" year="2000"/>  
</slot>  
<slot name="\_score\_startdate" type="string">SPURIOUS</slot>  
<slot name="Patient" type="string">PATIENT</slot>  
<slot name="\_score\_Patient" type="string">SPURIOUS</slot>  
<slot name="\_keyref" type="record"/>  
<slot name="\_score" type="string">SPURIOUS</slot>



```
<slot name="_type" type="string"></slot>
</record>
<record id="6" template="HealthStatusRecord">
<slot name="ScoreType" type="string">HealthStatusRecord</slot>
<slot name="_score_ScoreType" type="string">SPURIOUS</slot>
<slot name="source" type="string">C:\i2b2 eval\Subsets\Test\604.txt</slot>
<slot name="_score_source" type="string">SPURIOUS</slot>
<slot name="region" type="region">
<region end="326" start="308">FREQUENT HEADACHES</region>
</slot>
<slot name="_score_region" type="string">SPURIOUS</slot>
<slot name="rule" type="string">HealthStatusItemPkg/0</slot>
<slot name="ConceptName" type="string">FREQUENT HEADACHES</slot>
<slot name="_score_ConceptName" type="string">SPURIOUS</slot>
<slot name="SemanticType" type="string">Sign or Symptom</slot>
<slot name="BodyLocations" type="string">HEAD</slot>
<slot name="_score_BodyLocations" type="string">SPURIOUS</slot>
<slot name="SeverityStrings" type="string"></slot>
<slot name="UMLS_CUI" type="string">C0948396</slot>
<slot name="DaysBeforeDeath" type="int">0</slot>
<slot name="PAIN" type="string">Y</slot>
<slot name="MaxPain" type="int">1</slot>
<slot name="SeverityScale" type="int">1</slot>
<slot name="_score_SeverityScale" type="string">SPURIOUS</slot>
<slot name="polarity" type="string">POSITIVE</slot>
```

```
<slot name="DocType" type="string"></slot>
<slot name="PatientID" type="int">0</slot>
<slot name="DateObject" type="record"/>
<slot name="enddate" type="date">
<date day="22" month="10" year="2000"/>
</slot>
<slot name="_score_enddate" type="string">SPURIOUS</slot>
<slot name="startdate" type="date">
<date day="22" month="10" year="2000"/>
</slot>
<slot name="_score_startdate" type="string">SPURIOUS</slot>
<slot name="Patient" type="string">PATIENT</slot>
<slot name="_score_Patient" type="string">SPURIOUS</slot>
<slot name="_keyref" type="record"/>
<slot name="_score" type="string">SPURIOUS</slot>
<slot name="_type" type="string"></slot>
</record>
<record id="7" template="HealthStatusRecord">
<slot name="ScoreType" type="string">HealthStatusRecord</slot>
<slot name="_score_ScoreType" type="string"></slot>
<slot name="source" type="string">C:\i2b2 eval\Subsets\Test\604.txt</slot>
<slot name="_score_source" type="string"></slot>
<slot name="region" type="region">
<region end="4261" start="4257">pain</region>
</slot>
```

<slot name="\_score\_region" type="string"></slot>  
<slot name="rule" type="string">HealthStatusItemPkg/0</slot>  
<slot name="ConceptName" type="string">PAIN</slot>  
<slot name="\_score\_ConceptName" type="string"></slot>  
<slot name="SemanticType" type="string">Sign or Symptom</slot>  
<slot name="BodyLocations" type="string">MUCOUS MEMBRANES</slot>  
<slot name="\_score\_BodyLocations" type="string"></slot>  
<slot name="SeverityStrings" type="string"></slot>  
<slot name="UMLS\_CUI" type="string">C0030193</slot>  
<slot name="DaysBeforeDeath" type="int">0</slot>  
<slot name="PAIN" type="string">Y</slot>  
<slot name="MaxPain" type="int">1</slot>  
<slot name="SeverityScale" type="int">1</slot>  
<slot name="\_score\_SeverityScale" type="string"></slot>  
<slot name="polarity" type="string">POSITIVE</slot>  
<slot name="DocType" type="string"></slot>  
<slot name="PatientID" type="int">0</slot>  
<slot name="DateObject" type="record"/>  
<slot name="enddate" type="date">  
<date day="17" month="11" year="2000"/>  
</slot>  
<slot name="\_score\_enddate" type="string"></slot>  
<slot name="startdate" type="date">  
<date day="29" month="10" year="2000"/>  
</slot>

```
<slot name="_score_startdate" type="string"></slot>
<slot name="Patient" type="string">PATIENT</slot>
<slot name="_score_Patient" type="string"></slot>
<slot name="_keyref" type="record"/>
<slot name="_score" type="string"></slot>
<slot name="_type" type="string"></slot>
</record>
<record id="8" template="HealthStatusRecord">
<slot name="ScoreType" type="string">HealthStatusRecord</slot>
<slot name="_score_ScoreType" type="string">CORRECT</slot>
<slot name="source" type="string">C:\i2b2 eval\Subsets\Test\604.txt</slot>
<slot name="_score_source" type="string">CORRECT</slot>
<slot name="region" type="region">
<region end="4261" start="4257">pain</region>
</slot>
<slot name="_score_region" type="string">CORRECT</slot>
<slot name="rule" type="string">HealthStatusItemPkg/0</slot>
<slot name="ConceptName" type="string">PAIN</slot>
<slot name="_score_ConceptName" type="string">CORRECT</slot>
<slot name="SemanticType" type="string">Sign or Symptom</slot>
<slot name="BodyLocations" type="string"></slot>
<slot name="_score_BodyLocations" type="string">MISSING</slot>
<slot name="SeverityStrings" type="string"></slot>
<slot name="UMLS_CUI" type="string">C0030193</slot>
<slot name="DaysBeforeDeath" type="int">0</slot>
```

```
<slot name="PAIN" type="string">Y</slot>
<slot name="MaxPain" type="int">1</slot>
<slot name="SeverityScale" type="int">1</slot>
<slot name="_score_SeverityScale" type="string">CORRECT</slot>
<slot name="polarity" type="string">POSITIVE</slot>
<slot name="DocType" type="string"></slot>
<slot name="PatientID" type="int">0</slot>
<slot name="DateObject" type="record"/>
<slot name="enddate" type="date">
<date day="22" month="10" year="2000"/>
</slot>
<slot name="_score_enddate" type="string">INCORRECT</slot>
<slot name="startdate" type="date">
<date day="22" month="10" year="2000"/>
</slot>
<slot name="_score_startdate" type="string">INCORRECT</slot>
<slot name="Patient" type="string">PATIENT</slot>
<slot name="_score_Patient" type="string">CORRECT</slot>
<slot name="_keyref" type="record">
<record ref="7"/>
</slot>
<slot name="_score" type="string">INCORRECT</slot>
<slot name="_type" type="string"></slot>
</record>
<record id="9" template="HealthStatusRecord">
```

<slot name="ScoreType" type="string">HealthStatusRecord</slot>  
<slot name="\_score\_ScoreType" type="string"></slot>  
<slot name="source" type="string">C:\i2b2 eval\Subsets\Test\604.txt</slot>  
<slot name="\_score\_source" type="string"></slot>  
<slot name="region" type="region">  
<region end="2632" start="2622">chest pain</region>  
</slot>  
<slot name="\_score\_region" type="string"></slot>  
<slot name="rule" type="string">HealthStatusItemPkg/0</slot>  
<slot name="ConceptName" type="string">CHEST PAIN UNSPECIFIED</slot>  
<slot name="\_score\_ConceptName" type="string"></slot>  
<slot name="SemanticType" type="string">Sign or Symptom</slot>  
<slot name="BodyLocations" type="string">CHEST</slot>  
<slot name="\_score\_BodyLocations" type="string"></slot>  
<slot name="SeverityStrings" type="string"></slot>  
<slot name="UMLS\_CUI" type="string">C1535568</slot>  
<slot name="DaysBeforeDeath" type="int">0</slot>  
<slot name="PAIN" type="string">Y</slot>  
<slot name="MaxPain" type="int">1</slot>  
<slot name="SeverityScale" type="int">0</slot>  
<slot name="\_score\_SeverityScale" type="string"></slot>  
<slot name="polarity" type="string">POSITIVE</slot>  
<slot name="DocType" type="string"></slot>  
<slot name="PatientID" type="int">0</slot>  
<slot name="DateObject" type="record"/>

```
<slot name="enddate" type="date">
<date day="22" month="10" year="2000"/>
</slot>
<slot name="_score_enddate" type="string"></slot>
<slot name="startdate" type="date">
<date day="22" month="10" year="2000"/>
</slot>
<slot name="_score_startdate" type="string"></slot>
<slot name="Patient" type="string">PATIENT</slot>
<slot name="_score_Patient" type="string"></slot>
<slot name="_keyref" type="record"/>
<slot name="_score" type="string"></slot>
<slot name="_type" type="string"></slot>
</record>
<record id="10" template="HealthStatusRecord">
<slot name="ScoreType" type="string">HealthStatusRecord</slot>
<slot name="_score_ScoreType" type="string">SPURIOUS</slot>
<slot name="source" type="string">C:\i2b2 eval\Subsets\Test\604.txt</slot>
<slot name="_score_source" type="string">SPURIOUS</slot>
<slot name="region" type="region">
<region end="1908" start="1890">frequent headaches</region>
</slot>
<slot name="_score_region" type="string">SPURIOUS</slot>
<slot name="rule" type="string">HealthStatusItemPkg/0</slot>
<slot name="ConceptName" type="string">FREQUENT HEADACHES</slot>
```

<slot name="\_score\_ConceptName" type="string">SPURIOUS</slot>  
<slot name="SemanticType" type="string">Sign or Symptom</slot>  
<slot name="BodyLocations" type="string">HEAD</slot>  
<slot name="\_score\_BodyLocations" type="string">SPURIOUS</slot>  
<slot name="SeverityStrings" type="string"></slot>  
<slot name="UMLS\_CUI" type="string">C0948396</slot>  
<slot name="DaysBeforeDeath" type="int">0</slot>  
<slot name="PAIN" type="string">Y</slot>  
<slot name="MaxPain" type="int">1</slot>  
<slot name="SeverityScale" type="int">1</slot>  
<slot name="\_score\_SeverityScale" type="string">SPURIOUS</slot>  
<slot name="polarity" type="string">POSITIVE</slot>  
<slot name="DocType" type="string"></slot>  
<slot name="PatientID" type="int">0</slot>  
<slot name="DateObject" type="record"/>  
<slot name="enddate" type="date">  
<date day="22" month="10" year="2000"/>  
</slot>  
<slot name="\_score\_enddate" type="string">SPURIOUS</slot>  
<slot name="startdate" type="date">  
<date day="22" month="10" year="2000"/>  
</slot>  
<slot name="\_score\_startdate" type="string">SPURIOUS</slot>  
<slot name="Patient" type="string">PATIENT</slot>  
<slot name="\_score\_Patient" type="string">SPURIOUS</slot>



```
<slot name="_keyref" type="record"/>
<slot name="_score" type="string">SPURIOUS</slot>
<slot name="_type" type="string"></slot>
</record>
<record id="11" template="HealthStatusRecord">
<slot name="ScoreType" type="string">HealthStatusRecord</slot>
<slot name="_score_ScoreType" type="string"></slot>
<slot name="source" type="string">C:\i2b2 eval\Subsets\Test\604.txt</slot>
<slot name="_score_source" type="string"></slot>
<slot name="region" type="region">
<region end="2716" start="2712">pain</region>
</slot>
<slot name="_score_region" type="string"></slot>
<slot name="rule" type="string">HealthStatusItemPkg/0</slot>
<slot name="ConceptName" type="string">ABDOMINAL PAIN</slot>
<slot name="_score_ConceptName" type="string"></slot>
<slot name="SemanticType" type="string">Sign or Symptom</slot>
<slot name="BodyLocations" type="string">ABDOMEN</slot>
<slot name="_score_BodyLocations" type="string"></slot>
<slot name="SeverityStrings" type="string"></slot>
<slot name="UMLS_CUI" type="string">C0000737</slot>
<slot name="DaysBeforeDeath" type="int">0</slot>
<slot name="PAIN" type="string">Y</slot>
<slot name="MaxPain" type="int">1</slot>
<slot name="SeverityScale" type="int">0</slot>
```

```
<slot name="_score_SeverityScale" type="string"></slot>
<slot name="polarity" type="string">POSITIVE</slot>
<slot name="DocType" type="string"></slot>
<slot name="PatientID" type="int">0</slot>
<slot name="DateObject" type="record"/>
<slot name="enddate" type="date">
<date day="22" month="10" year="2000"/>
</slot>
<slot name="_score_enddate" type="string"></slot>
<slot name="startdate" type="date">
<date day="22" month="10" year="2000"/>
</slot>
<slot name="_score_startdate" type="string"></slot>
<slot name="Patient" type="string">PATIENT</slot>
<slot name="_score_Patient" type="string"></slot>
<slot name="_keyref" type="record"/>
<slot name="_score" type="string"></slot>
<slot name="_type" type="string"></slot>
</record>
<record id="12" template="HealthStatusRecord">
<slot name="ScoreType" type="string">HealthStatusRecord</slot>
<slot name="_score_ScoreType" type="string">SPURIOUS</slot>
<slot name="source" type="string">C:\i2b2 eval\Subsets\Test\604.txt</slot>
<slot name="_score_source" type="string">SPURIOUS</slot>
<slot name="region" type="region">
```

<region end="5008" start="5004">pain</region>  
</slot>  
<slot name="\_score\_region" type="string">SPURIOUS</slot>  
<slot name="rule" type="string">HealthStatusItemPkg/0</slot>  
<slot name="ConceptName" type="string">PAIN</slot>  
<slot name="\_score\_ConceptName" type="string">SPURIOUS</slot>  
<slot name="SemanticType" type="string">Sign or Symptom</slot>  
<slot name="BodyLocations" type="string"></slot>  
<slot name="\_score\_BodyLocations" type="string"></slot>  
<slot name="SeverityStrings" type="string"></slot>  
<slot name="UMLS\_CUI" type="string">C0030193</slot>  
<slot name="DaysBeforeDeath" type="int">0</slot>  
<slot name="PAIN" type="string">Y</slot>  
<slot name="MaxPain" type="int">1</slot>  
<slot name="SeverityScale" type="int">1</slot>  
<slot name="\_score\_SeverityScale" type="string">SPURIOUS</slot>  
<slot name="polarity" type="string">POSITIVE</slot>  
<slot name="DocType" type="string"></slot>  
<slot name="PatientID" type="int">0</slot>  
<slot name="DateObject" type="record"/>  
<slot name="enddate" type="date">  
<date day="22" month="10" year="2000"/>  
</slot>  
<slot name="\_score\_enddate" type="string">SPURIOUS</slot>  
<slot name="startdate" type="date">

```
<date day="22" month="10" year="2000"/>
</slot>
<slot name="_score_startdate" type="string">SPURIOUS</slot>
<slot name="Patient" type="string">PATIENT</slot>
<slot name="_score_Patient" type="string">SPURIOUS</slot>
<slot name="_keyref" type="record"/>
<slot name="_score" type="string">SPURIOUS</slot>
<slot name="_type" type="string"></slot>
</record>
</records>
</infStore>
<?xml version="1.0" encoding="UTF-8"?>
<infStore>
<records>
<record id="0" template="HealthStatusRecord">
<slot name="ScoreType" type="string">HealthStatusRecord</slot>
<slot name="_score_ScoreType" type="string"></slot>
<slot name="source" type="string">C:\i2b2 eval\Subsets\Test\611.txt</slot>
<slot name="_score_source" type="string"></slot>
<slot name="region" type="region">
<region end="5547" start="5543">pain</region>
</slot>
<slot name="_score_region" type="string"></slot>
<slot name="rule" type="string">HealthStatusItemPkg/0</slot>
<slot name="ConceptName" type="string">PAIN</slot>
```

<slot name="\_score\_ConceptName" type="string"></slot>  
<slot name="SemanticType" type="string">Sign or Symptom</slot>  
<slot name="BodyLocations" type="string">CHEST</slot>  
<slot name="\_score\_BodyLocations" type="string"></slot>  
<slot name="SeverityStrings" type="string"></slot>  
<slot name="UMLS\_CUI" type="string">C0030193</slot>  
<slot name="DaysBeforeDeath" type="int">0</slot>  
<slot name="PAIN" type="string">Y</slot>  
<slot name="MaxPain" type="int">1</slot>  
<slot name="SeverityScale" type="int">1</slot>  
<slot name="\_score\_SeverityScale" type="string"></slot>  
<slot name="polarity" type="string">POSITIVE</slot>  
<slot name="DocType" type="string"></slot>  
<slot name="PatientID" type="int">0</slot>  
<slot name="DateObject" type="record"/>  
<slot name="enddate" type="date">  
<date day="13" month="1" year="1999"/>  
</slot>  
<slot name="\_score\_enddate" type="string"></slot>  
<slot name="startdate" type="date">  
<date day="13" month="1" year="1999"/>  
</slot>  
<slot name="\_score\_startdate" type="string"></slot>  
<slot name="Patient" type="string">PATIENT</slot>  
<slot name="\_score\_Patient" type="string"></slot>

```
<slot name="_keyref" type="record"/>
<slot name="_score" type="string"></slot>
<slot name="_type" type="string"></slot>
</record>
<record id="1" template="HealthStatusRecord">
<slot name="ScoreType" type="string">HealthStatusRecord</slot>
<slot name="_score_ScoreType" type="string"></slot>
<slot name="source" type="string">C:\i2b2 eval\Subsets\Test\611.txt</slot>
<slot name="_score_source" type="string"></slot>
<slot name="region" type="region">
<region end="1397" start="1387">chest pain</region>
</slot>
<slot name="_score_region" type="string"></slot>
<slot name="rule" type="string">HealthStatusItemPkg/0</slot>
<slot name="ConceptName" type="string">CHEST PAIN UNSPECIFIED</slot>
<slot name="_score_ConceptName" type="string"></slot>
<slot name="SemanticType" type="string">Sign or Symptom</slot>
<slot name="BodyLocations" type="string">CHEST</slot>
<slot name="_score_BodyLocations" type="string"></slot>
<slot name="SeverityStrings" type="string"></slot>
<slot name="UMLS_CUI" type="string">C1535568</slot>
<slot name="DaysBeforeDeath" type="int">0</slot>
<slot name="PAIN" type="string">Y</slot>
<slot name="MaxPain" type="int">1</slot>
<slot name="SeverityScale" type="int">1</slot>
```

```
<slot name="_score_SeverityScale" type="string"></slot>
<slot name="polarity" type="string">POSITIVE</slot>
<slot name="DocType" type="string"></slot>
<slot name="PatientID" type="int">0</slot>
<slot name="DateObject" type="record"/>
<slot name="enddate" type="date">
<date day="30" month="4" year="1998"/>
</slot>
<slot name="_score_enddate" type="string"></slot>
<slot name="startdate" type="date">
<date day="1" month="4" year="1998"/>
</slot>
<slot name="_score_startdate" type="string"></slot>
<slot name="Patient" type="string">PATIENT</slot>
<slot name="_score_Patient" type="string"></slot>
<slot name="_keyref" type="record"/>
<slot name="_score" type="string"></slot>
<slot name="_type" type="string"></slot>
</record>
<record id="2" template="HealthStatusRecord">
<slot name="ScoreType" type="string">HealthStatusRecord</slot>
<slot name="_score_ScoreType" type="string">CORRECT</slot>
<slot name="source" type="string">C:\i2b2 eval\Subsets\Test\611.txt</slot>
<slot name="_score_source" type="string">CORRECT</slot>
<slot name="region" type="region">
```

<region end="1397" start="1387">chest pain</region>  
</slot>  
<slot name="\_score\_region" type="string">CORRECT</slot>  
<slot name="rule" type="string">HealthStatusItemPkg/0</slot>  
<slot name="ConceptName" type="string">CHEST PAIN</slot>  
<slot name="\_score\_ConceptName" type="string">INCORRECT</slot>  
<slot name="SemanticType" type="string">Sign or Symptom</slot>  
<slot name="BodyLocations" type="string">CHEST</slot>  
<slot name="\_score\_BodyLocations" type="string">CORRECT</slot>  
<slot name="SeverityStrings" type="string"></slot>  
<slot name="UMLS\_CUI" type="string">C0008031</slot>  
<slot name="DaysBeforeDeath" type="int">0</slot>  
<slot name="PAIN" type="string">Y</slot>  
<slot name="MaxPain" type="int">1</slot>  
<slot name="SeverityScale" type="int">1</slot>  
<slot name="\_score\_SeverityScale" type="string">CORRECT</slot>  
<slot name="polarity" type="string">POSITIVE</slot>  
<slot name="DocType" type="string"></slot>  
<slot name="PatientID" type="int">0</slot>  
<slot name="DateObject" type="record"/>  
<slot name="enddate" type="date">  
<date day="10" month="1" year="1999"/>  
</slot>  
<slot name="\_score\_enddate" type="string">INCORRECT</slot>  
<slot name="startdate" type="date">



```
<date day="10" month="1" year="1999"/>
</slot>
<slot name="_score_startdate" type="string">INCORRECT</slot>
<slot name="Patient" type="string">PATIENT</slot>
<slot name="_score_Patient" type="string">CORRECT</slot>
<slot name="_keyref" type="record">
<record ref="1"/>
</slot>
<slot name="_score" type="string">INCORRECT</slot>
<slot name="_type" type="string"></slot>
</record>
<record id="3" template="HealthStatusRecord">
<slot name="ScoreType" type="string">HealthStatusRecord</slot>
<slot name="_score_ScoreType" type="string"></slot>
<slot name="source" type="string">C:\i2b2 eval\Subsets\Test\611.txt</slot>
<slot name="_score_source" type="string"></slot>
<slot name="region" type="region">
<region end="1463" start="1457">angina</region>
</slot>
<slot name="_score_region" type="string"></slot>
<slot name="rule" type="string">HealthStatusItemPkg/0</slot>
<slot name="ConceptName" type="string">ANGINA PECTORIS</slot>
<slot name="_score_ConceptName" type="string"></slot>
<slot name="SemanticType" type="string">Sign or Symptom</slot>
<slot name="BodyLocations" type="string">CHEST</slot>
```

<slot name="\_score\_BodyLocations" type="string"></slot>  
<slot name="SeverityStrings" type="string"></slot>  
<slot name="UMLS\_CUI" type="string">C0002962</slot>  
<slot name="DaysBeforeDeath" type="int">0</slot>  
<slot name="PAIN" type="string">Y</slot>  
<slot name="MaxPain" type="int">1</slot>  
<slot name="SeverityScale" type="int">1</slot>  
<slot name="\_score\_SeverityScale" type="string"></slot>  
<slot name="polarity" type="string">POSITIVE</slot>  
<slot name="DocType" type="string"></slot>  
<slot name="PatientID" type="int">0</slot>  
<slot name="DateObject" type="record"/>  
<slot name="enddate" type="date">  
<date day="30" month="6" year="1998"/>  
</slot>  
<slot name="\_score\_enddate" type="string"></slot>  
<slot name="startdate" type="date">  
<date day="1" month="6" year="1998"/>  
</slot>  
<slot name="\_score\_startdate" type="string"></slot>  
<slot name="Patient" type="string">PATIENT</slot>  
<slot name="\_score\_Patient" type="string"></slot>  
<slot name="\_keyref" type="record"/>  
<slot name="\_score" type="string"></slot>  
<slot name="\_type" type="string"></slot>

```
</record>
<record id="4" template="HealthStatusRecord">
  <slot name="ScoreType" type="string">HealthStatusRecord</slot>
  <slot name="_score_ScoreType" type="string">CORRECT</slot>
  <slot name="source" type="string">C:\i2b2 eval\Subsets\Test\611.txt</slot>
  <slot name="_score_source" type="string">CORRECT</slot>
  <slot name="region" type="region">
    <region end="1463" start="1457">angina</region>
  </slot>
  <slot name="_score_region" type="string">CORRECT</slot>
  <slot name="rule" type="string">HealthStatusItemPkg/0</slot>
  <slot name="ConceptName" type="string">ANGINA PECTORIS</slot>
  <slot name="_score_ConceptName" type="string">CORRECT</slot>
  <slot name="SemanticType" type="string">Sign or Symptom</slot>
  <slot name="BodyLocations" type="string">CHEST</slot>
  <slot name="_score_BodyLocations" type="string">CORRECT</slot>
  <slot name="SeverityStrings" type="string"></slot>
  <slot name="UMLS_CUI" type="string">C0002962</slot>
  <slot name="DaysBeforeDeath" type="int">0</slot>
  <slot name="PAIN" type="string">Y</slot>
  <slot name="MaxPain" type="int">1</slot>
  <slot name="SeverityScale" type="int">1</slot>
  <slot name="_score_SeverityScale" type="string">CORRECT</slot>
  <slot name="polarity" type="string">POSITIVE</slot>
  <slot name="DocType" type="string"></slot>
```

```
<slot name="PatientID" type="int">0</slot>
<slot name="DateObject" type="record"/>
<slot name="enddate" type="date">
<date day="10" month="1" year="1999"/>
</slot>
<slot name="_score_enddate" type="string">INCORRECT</slot>
<slot name="startdate" type="date">
<date day="10" month="1" year="1999"/>
</slot>
<slot name="_score_startdate" type="string">INCORRECT</slot>
<slot name="Patient" type="string">PATIENT</slot>
<slot name="_score_Patient" type="string">CORRECT</slot>
<slot name="_keyref" type="record">
<record ref="3"/>
</slot>
<slot name="_score" type="string">INCORRECT</slot>
<slot name="_type" type="string"></slot>
</record>
<record id="5" template="HealthStatusRecord">
<slot name="ScoreType" type="string">HealthStatusRecord</slot>
<slot name="_score_ScoreType" type="string"></slot>
<slot name="source" type="string">C:\i2b2 eval\Subsets\Test\611.txt</slot>
<slot name="_score_source" type="string"></slot>
<slot name="region" type="region">
<region end="1718" start="1708">chest pain</region>
```

</slot>  
<slot name="\_score\_region" type="string"></slot>  
<slot name="rule" type="string">HealthStatusItemPkg/0</slot>  
<slot name="ConceptName" type="string">CHEST PAIN UNSPECIFIED</slot>  
<slot name="\_score\_ConceptName" type="string"></slot>  
<slot name="SemanticType" type="string">Sign or Symptom</slot>  
<slot name="BodyLocations" type="string">CHEST</slot>  
<slot name="\_score\_BodyLocations" type="string"></slot>  
<slot name="SeverityStrings" type="string"></slot>  
<slot name="UMLS\_CUI" type="string">C1535568</slot>  
<slot name="DaysBeforeDeath" type="int">0</slot>  
<slot name="PAIN" type="string">Y</slot>  
<slot name="MaxPain" type="int">1</slot>  
<slot name="SeverityScale" type="int">1</slot>  
<slot name="\_score\_SeverityScale" type="string"></slot>  
<slot name="polarity" type="string">POSITIVE</slot>  
<slot name="DocType" type="string"></slot>  
<slot name="PatientID" type="int">0</slot>  
<slot name="DateObject" type="record"/>  
<slot name="enddate" type="date">  
<date day="31" month="12" year="1998"/>  
</slot>  
<slot name="\_score\_enddate" type="string"></slot>  
<slot name="startdate" type="date">  
<date day="31" month="12" year="1998"/>

```
</slot>
<slot name="_score_startdate" type="string"></slot>
<slot name="Patient" type="string">PATIENT</slot>
<slot name="_score_Patient" type="string"></slot>
<slot name="_keyref" type="record"/>
<slot name="_score" type="string"></slot>
<slot name="_type" type="string"></slot>
</record>
<record id="6" template="HealthStatusRecord">
<slot name="ScoreType" type="string">HealthStatusRecord</slot>
<slot name="_score_ScoreType" type="string">CORRECT</slot>
<slot name="source" type="string">C:\i2b2 eval\Subsets\Test\611.txt</slot>
<slot name="_score_source" type="string">CORRECT</slot>
<slot name="region" type="region">
<region end="1718" start="1708">chest pain</region>
</slot>
<slot name="_score_region" type="string">CORRECT</slot>
<slot name="rule" type="string">HealthStatusItemPkg/0</slot>
<slot name="ConceptName" type="string">CHEST PAIN</slot>
<slot name="_score_ConceptName" type="string">INCORRECT</slot>
<slot name="SemanticType" type="string">Sign or Symptom</slot>
<slot name="BodyLocations" type="string">CHEST</slot>
<slot name="_score_BodyLocations" type="string">CORRECT</slot>
<slot name="SeverityStrings" type="string"></slot>
<slot name="UMLS_CUI" type="string">C0008031</slot>
```

```
<slot name="DaysBeforeDeath" type="int">0</slot>
<slot name="PAIN" type="string">Y</slot>
<slot name="MaxPain" type="int">1</slot>
<slot name="SeverityScale" type="int">1</slot>
<slot name="_score_SeverityScale" type="string">CORRECT</slot>
<slot name="polarity" type="string">POSITIVE</slot>
<slot name="DocType" type="string"></slot>
<slot name="PatientID" type="int">0</slot>
<slot name="DateObject" type="record"/>
<slot name="enddate" type="date">
<date day="10" month="1" year="1999"/>
</slot>
<slot name="_score_enddate" type="string">INCORRECT</slot>
<slot name="startdate" type="date">
<date day="10" month="1" year="1999"/>
</slot>
<slot name="_score_startdate" type="string">INCORRECT</slot>
<slot name="Patient" type="string">PATIENT</slot>
<slot name="_score_Patient" type="string">CORRECT</slot>
<slot name="_keyref" type="record">
<record ref="5"/>
</slot>
<slot name="_score" type="string">INCORRECT</slot>
<slot name="_type" type="string"></slot>
</record>
```

```
<record id="7" template="HealthStatusRecord">
  <slot name="ScoreType" type="string">HealthStatusRecord</slot>
  <slot name="_score_ScoreType" type="string">CORRECT</slot>
  <slot name="source" type="string">C:\i2b2 eval\Subsets\Test\611.txt</slot>
  <slot name="_score_source" type="string">CORRECT</slot>
  <slot name="region" type="region">
    <region end="5322" start="5316">angina</region>
  </slot>
  <slot name="_score_region" type="string">CORRECT</slot>
  <slot name="rule" type="string">HealthStatusItemPkg/0</slot>
  <slot name="ConceptName" type="string">ANGINA PECTORIS</slot>
  <slot name="_score_ConceptName" type="string">CORRECT</slot>
  <slot name="SemanticType" type="string">Sign or Symptom</slot>
  <slot name="BodyLocations" type="string">CHEST</slot>
  <slot name="_score_BodyLocations" type="string">CORRECT</slot>
  <slot name="SeverityStrings" type="string"></slot>
  <slot name="UMLS_CUI" type="string">C0002962</slot>
  <slot name="DaysBeforeDeath" type="int">0</slot>
  <slot name="PAIN" type="string">Y</slot>
  <slot name="MaxPain" type="int">1</slot>
  <slot name="SeverityScale" type="int">1</slot>
  <slot name="_score_SeverityScale" type="string">CORRECT</slot>
  <slot name="polarity" type="string">POSITIVE</slot>
  <slot name="DocType" type="string"></slot>
  <slot name="PatientID" type="int">0</slot>
```



```
<slot name="DateObject" type="record"/>
<slot name="enddate" type="date">
<date day="10" month="1" year="1999"/>
</slot>
<slot name="_score_enddate" type="string">CORRECT</slot>
<slot name="startdate" type="date">
<date day="10" month="1" year="1999"/>
</slot>
<slot name="_score_startdate" type="string">CORRECT</slot>
<slot name="Patient" type="string">PATIENT</slot>
<slot name="_score_Patient" type="string">CORRECT</slot>
<slot name="_keyref" type="record"/>
<slot name="_score" type="string">CORRECT</slot>
<slot name="_type" type="string"></slot>
</record>
<record id="8" template="HealthStatusRecord">
<slot name="ScoreType" type="string">HealthStatusRecord</slot>
<slot name="_score_ScoreType" type="string"></slot>
<slot name="source" type="string">C:\i2b2 eval\Subsets\Test\611.txt</slot>
<slot name="_score_source" type="string"></slot>
<slot name="region" type="region">
<region end="5386" start="5376">chest pain</region>
</slot>
<slot name="_score_region" type="string"></slot>
<slot name="rule" type="string">HealthStatusItemPkg/0</slot>
```

<slot name="ConceptName" type="string">CHEST PAIN UNSPECIFIED</slot>  
<slot name="\_score\_ConceptName" type="string"></slot>  
<slot name="SemanticType" type="string">Sign or Symptom</slot>  
<slot name="BodyLocations" type="string">CHEST</slot>  
<slot name="\_score\_BodyLocations" type="string"></slot>  
<slot name="SeverityStrings" type="string"></slot>  
<slot name="UMLS\_CUI" type="string">C1535568</slot>  
<slot name="DaysBeforeDeath" type="int">0</slot>  
<slot name="PAIN" type="string">Y</slot>  
<slot name="MaxPain" type="int">1</slot>  
<slot name="SeverityScale" type="int">1</slot>  
<slot name="\_score\_SeverityScale" type="string"></slot>  
<slot name="polarity" type="string">POSITIVE</slot>  
<slot name="DocType" type="string"></slot>  
<slot name="PatientID" type="int">0</slot>  
<slot name="DateObject" type="record"/>  
<slot name="enddate" type="date">  
<date day="13" month="1" year="1999"/>  
</slot>  
<slot name="\_score\_enddate" type="string"></slot>  
<slot name="startdate" type="date">  
<date day="13" month="1" year="1999"/>  
</slot>  
<slot name="\_score\_startdate" type="string"></slot>  
<slot name="Patient" type="string">PATIENT</slot>

```
<slot name="_score_Patient" type="string"></slot>
<slot name="_keyref" type="record"/>
<slot name="_score" type="string"></slot>
<slot name="_type" type="string"></slot>
</record>
<record id="9" template="HealthStatusRecord">
<slot name="ScoreType" type="string">HealthStatusRecord</slot>
<slot name="_score_ScoreType" type="string">CORRECT</slot>
<slot name="source" type="string">C:\i2b2 eval\Subsets\Test\611.txt</slot>
<slot name="_score_source" type="string">CORRECT</slot>
<slot name="region" type="region">
<region end="5386" start="5376">chest pain</region>
</slot>
<slot name="_score_region" type="string">CORRECT</slot>
<slot name="rule" type="string">HealthStatusItemPkg/0</slot>
<slot name="ConceptName" type="string">CHEST PAIN</slot>
<slot name="_score_ConceptName" type="string">INCORRECT</slot>
<slot name="SemanticType" type="string">Sign or Symptom</slot>
<slot name="BodyLocations" type="string">CHEST</slot>
<slot name="_score_BodyLocations" type="string">CORRECT</slot>
<slot name="SeverityStrings" type="string"></slot>
<slot name="UMLS_CUI" type="string">C0008031</slot>
<slot name="DaysBeforeDeath" type="int">0</slot>
<slot name="PAIN" type="string">Y</slot>
<slot name="MaxPain" type="int">1</slot>
```

```
<slot name="SeverityScale" type="int">1</slot>
<slot name="_score_SeverityScale" type="string">CORRECT</slot>
<slot name="polarity" type="string">POSITIVE</slot>
<slot name="DocType" type="string"></slot>
<slot name="PatientID" type="int">0</slot>
<slot name="DateObject" type="record"/>
<slot name="enddate" type="date">
<date day="10" month="1" year="1999"/>
</slot>
<slot name="_score_enddate" type="string">INCORRECT</slot>
<slot name="startdate" type="date">
<date day="10" month="1" year="1999"/>
</slot>
<slot name="_score_startdate" type="string">INCORRECT</slot>
<slot name="Patient" type="string">PATIENT</slot>
<slot name="_score_Patient" type="string">CORRECT</slot>
<slot name="_keyref" type="record">
<record ref="8"/>
</slot>
<slot name="_score" type="string">INCORRECT</slot>
<slot name="_type" type="string"></slot>
</record>
<record id="10" template="HealthStatusRecord">
<slot name="ScoreType" type="string">HealthStatusRecord</slot>
<slot name="_score_ScoreType" type="string"></slot>
```

<slot name="source" type="string">C:\i2b2 eval\Subsets\Test\611.txt</slot>  
<slot name="\_score\_source" type="string"></slot>  
<slot name="region" type="region">  
<region end="1397" start="1387">chest pain</region>  
</slot>  
<slot name="\_score\_region" type="string"></slot>  
<slot name="rule" type="string">HealthStatusItemPkg/0</slot>  
<slot name="ConceptName" type="string">CHEST PAIN UNSPECIFIED</slot>  
<slot name="\_score\_ConceptName" type="string"></slot>  
<slot name="SemanticType" type="string">Sign or Symptom</slot>  
<slot name="BodyLocations" type="string">CHEST</slot>  
<slot name="\_score\_BodyLocations" type="string"></slot>  
<slot name="SeverityStrings" type="string"></slot>  
<slot name="UMLS\_CUI" type="string">C1535568</slot>  
<slot name="DaysBeforeDeath" type="int">0</slot>  
<slot name="PAIN" type="string">Y</slot>  
<slot name="MaxPain" type="int">1</slot>  
<slot name="SeverityScale" type="int">1</slot>  
<slot name="\_score\_SeverityScale" type="string"></slot>  
<slot name="polarity" type="string">POSITIVE</slot>  
<slot name="DocType" type="string"></slot>  
<slot name="PatientID" type="int">0</slot>  
<slot name="DateObject" type="record"/>  
<slot name="enddate" type="date">  
<date day="30" month="4" year="1998"/>

```
</slot>
<slot name="_score_enddate" type="string"></slot>
<slot name="startdate" type="date">
<date day="1" month="4" year="1998"/>
</slot>
<slot name="_score_startdate" type="string"></slot>
<slot name="Patient" type="string">PATIENT</slot>
<slot name="_score_Patient" type="string"></slot>
<slot name="_keyref" type="record"/>
<slot name="_score" type="string"></slot>
<slot name="_type" type="string"></slot>
</record>
<record id="11" template="HealthStatusRecord">
<slot name="ScoreType" type="string">HealthStatusRecord</slot>
<slot name="_score_ScoreType" type="string"></slot>
<slot name="source" type="string">C:\i2b2 eval\Subsets\Test\611.txt</slot>
<slot name="_score_source" type="string"></slot>
<slot name="region" type="region">
<region end="5547" start="5543">pain</region>
</slot>
<slot name="_score_region" type="string"></slot>
<slot name="rule" type="string">HealthStatusItemPkg/0</slot>
<slot name="ConceptName" type="string">PAIN</slot>
<slot name="_score_ConceptName" type="string"></slot>
<slot name="SemanticType" type="string">Sign or Symptom</slot>
```

<slot name="BodyLocations" type="string">CHEST</slot>  
<slot name="\_score\_BodyLocations" type="string"></slot>  
<slot name="SeverityStrings" type="string"></slot>  
<slot name="UMLS\_CUI" type="string">C0030193</slot>  
<slot name="DaysBeforeDeath" type="int">0</slot>  
<slot name="PAIN" type="string">Y</slot>  
<slot name="MaxPain" type="int">1</slot>  
<slot name="SeverityScale" type="int">1</slot>  
<slot name="\_score\_SeverityScale" type="string"></slot>  
<slot name="polarity" type="string">POSITIVE</slot>  
<slot name="DocType" type="string"></slot>  
<slot name="PatientID" type="int">0</slot>  
<slot name="DateObject" type="record"/>  
<slot name="enddate" type="date">  
<date day="13" month="1" year="1999"/>  
</slot>  
<slot name="\_score\_enddate" type="string"></slot>  
<slot name="startdate" type="date">  
<date day="13" month="1" year="1999"/>  
</slot>  
<slot name="\_score\_startdate" type="string"></slot>  
<slot name="Patient" type="string">PATIENT</slot>  
<slot name="\_score\_Patient" type="string"></slot>  
<slot name="\_keyref" type="record"/>  
<slot name="\_score" type="string"></slot>

```
<slot name="_type" type="string"></slot>
</record>
<record id="12" template="HealthStatusRecord">
  <slot name="ScoreType" type="string">HealthStatusRecord</slot>
  <slot name="_score_ScoreType" type="string">CORRECT</slot>
  <slot name="source" type="string">C:\i2b2 eval\Subsets\Test\611.txt</slot>
  <slot name="_score_source" type="string">CORRECT</slot>
  <slot name="region" type="region">
    <region end="5547" start="5543">pain</region>
  </slot>
  <slot name="_score_region" type="string">CORRECT</slot>
  <slot name="rule" type="string">HealthStatusItemPkg/0</slot>
  <slot name="ConceptName" type="string">PAIN</slot>
  <slot name="_score_ConceptName" type="string">CORRECT</slot>
  <slot name="SemanticType" type="string">Sign or Symptom</slot>
  <slot name="BodyLocations" type="string"></slot>
  <slot name="_score_BodyLocations" type="string">MISSING</slot>
  <slot name="SeverityStrings" type="string"></slot>
  <slot name="UMLS_CUI" type="string">C0030193</slot>
  <slot name="DaysBeforeDeath" type="int">0</slot>
  <slot name="PAIN" type="string">Y</slot>
  <slot name="MaxPain" type="int">1</slot>
  <slot name="SeverityScale" type="int">1</slot>
  <slot name="_score_SeverityScale" type="string">CORRECT</slot>
  <slot name="polarity" type="string">POSITIVE</slot>
```



```
<slot name="DocType" type="string"></slot>
<slot name="PatientID" type="int">0</slot>
<slot name="DateObject" type="record"/>
<slot name="enddate" type="date">
<date day="10" month="1" year="1999"/>
</slot>
<slot name="_score_enddate" type="string">INCORRECT</slot>
<slot name="startdate" type="date">
<date day="10" month="1" year="1999"/>
</slot>
<slot name="_score_startdate" type="string">INCORRECT</slot>
<slot name="Patient" type="string">PATIENT</slot>
<slot name="_score_Patient" type="string">CORRECT</slot>
<slot name="_keyref" type="record">
<record ref="11"/>
</slot>
<slot name="_score" type="string">INCORRECT</slot>
<slot name="_type" type="string"></slot>
</record>
<record id="13" template="HealthStatusRecord">
<slot name="ScoreType" type="string">HealthStatusRecord</slot>
<slot name="_score_ScoreType" type="string"></slot>
<slot name="source" type="string">C:\i2b2 eval\Subsets\Test\611.txt</slot>
<slot name="_score_source" type="string"></slot>
<slot name="region" type="region">
```

<region end="1718" start="1708">chest pain</region>  
</slot>  
<slot name="\_score\_region" type="string"></slot>  
<slot name="rule" type="string">HealthStatusItemPkg/0</slot>  
<slot name="ConceptName" type="string">CHEST PAIN UNSPECIFIED</slot>  
<slot name="\_score\_ConceptName" type="string"></slot>  
<slot name="SemanticType" type="string">Sign or Symptom</slot>  
<slot name="BodyLocations" type="string">CHEST</slot>  
<slot name="\_score\_BodyLocations" type="string"></slot>  
<slot name="SeverityStrings" type="string"></slot>  
<slot name="UMLS\_CUI" type="string">C1535568</slot>  
<slot name="DaysBeforeDeath" type="int">0</slot>  
<slot name="PAIN" type="string">Y</slot>  
<slot name="MaxPain" type="int">1</slot>  
<slot name="SeverityScale" type="int">1</slot>  
<slot name="\_score\_SeverityScale" type="string"></slot>  
<slot name="polarity" type="string">POSITIVE</slot>  
<slot name="DocType" type="string"></slot>  
<slot name="PatientID" type="int">0</slot>  
<slot name="DateObject" type="record"/>  
<slot name="enddate" type="date">  
<date day="31" month="12" year="1998"/>  
</slot>  
<slot name="\_score\_enddate" type="string"></slot>  
<slot name="startdate" type="date">

```
<date day="31" month="12" year="1998"/>
</slot>
<slot name="_score_startdate" type="string"></slot>
<slot name="Patient" type="string">PATIENT</slot>
<slot name="_score_Patient" type="string"></slot>
<slot name="_keyref" type="record"/>
<slot name="_score" type="string"></slot>
<slot name="_type" type="string"></slot>
</record>
<record id="14" template="HealthStatusRecord">
<slot name="ScoreType" type="string">HealthStatusRecord</slot>
<slot name="_score_ScoreType" type="string">MISSING</slot>
<slot name="source" type="string">C:\i2b2 eval\Subsets\Test\611.txt</slot>
<slot name="_score_source" type="string">MISSING</slot>
<slot name="region" type="region">
<region end="4129" start="4123">tender</region>
</slot>
<slot name="_score_region" type="string">MISSING</slot>
<slot name="rule" type="string"></slot>
<slot name="ConceptName" type="string">TENDER</slot>
<slot name="_score_ConceptName" type="string">MISSING</slot>
<slot name="SemanticType" type="string"></slot>
<slot name="BodyLocations" type="string">ABDOMEN</slot>
<slot name="_score_BodyLocations" type="string">MISSING</slot>
<slot name="SeverityStrings" type="string"></slot>
```

```
<slot name="UMLS_CUI" type="string"></slot>
<slot name="DaysBeforeDeath" type="int">0</slot>
<slot name="PAIN" type="string">Y</slot>
<slot name="MaxPain" type="int">0</slot>
<slot name="SeverityScale" type="int">1</slot>
<slot name="_score_SeverityScale" type="string">MISSING</slot>
<slot name="polarity" type="string"></slot>
<slot name="DocType" type="string"></slot>
<slot name="PatientID" type="int">0</slot>
<slot name="DateObject" type="record"/>
<slot name="enddate" type="date">
<date day="10" month="1" year="1999"/>
</slot>
<slot name="_score_enddate" type="string">MISSING</slot>
<slot name="startdate" type="date">
<date day="10" month="1" year="1999"/>
</slot>
<slot name="_score_startdate" type="string">MISSING</slot>
<slot name="Patient" type="string"></slot>
<slot name="_score_Patient" type="string"></slot>
<slot name="_keyref" type="record"/>
<slot name="_score" type="string">MISSING</slot>
<slot name="_type" type="string"></slot>
</record>
<record id="15" template="HealthStatusRecord">
```

<slot name="ScoreType" type="string">HealthStatusRecord</slot>  
<slot name="\_score\_ScoreType" type="string"></slot>  
<slot name="source" type="string">C:\i2b2 eval\Subsets\Test\611.txt</slot>  
<slot name="\_score\_source" type="string"></slot>  
<slot name="region" type="region">  
<region end="1463" start="1457">angina</region>  
</slot>  
<slot name="\_score\_region" type="string"></slot>  
<slot name="rule" type="string">HealthStatusItemPkg/0</slot>  
<slot name="ConceptName" type="string">ANGINA PECTORIS</slot>  
<slot name="\_score\_ConceptName" type="string"></slot>  
<slot name="SemanticType" type="string">Sign or Symptom</slot>  
<slot name="BodyLocations" type="string">CHEST</slot>  
<slot name="\_score\_BodyLocations" type="string"></slot>  
<slot name="SeverityStrings" type="string"></slot>  
<slot name="UMLS\_CUI" type="string">C0002962</slot>  
<slot name="DaysBeforeDeath" type="int">0</slot>  
<slot name="PAIN" type="string">Y</slot>  
<slot name="MaxPain" type="int">1</slot>  
<slot name="SeverityScale" type="int">1</slot>  
<slot name="\_score\_SeverityScale" type="string"></slot>  
<slot name="polarity" type="string">POSITIVE</slot>  
<slot name="DocType" type="string"></slot>  
<slot name="PatientID" type="int">0</slot>  
<slot name="DateObject" type="record"/>

```
<slot name="enddate" type="date">
<date day="30" month="6" year="1998"/>
</slot>
<slot name="_score_enddate" type="string"></slot>
<slot name="startdate" type="date">
<date day="1" month="6" year="1998"/>
</slot>
<slot name="_score_startdate" type="string"></slot>
<slot name="Patient" type="string">PATIENT</slot>
<slot name="_score_Patient" type="string"></slot>
<slot name="_keyref" type="record"/>
<slot name="_score" type="string"></slot>
<slot name="_type" type="string"></slot>
</record>
<record id="16" template="HealthStatusRecord">
<slot name="ScoreType" type="string">HealthStatusRecord</slot>
<slot name="_score_ScoreType" type="string"></slot>
<slot name="source" type="string">C:\i2b2 eval\Subsets\Test\611.txt</slot>
<slot name="_score_source" type="string"></slot>
<slot name="region" type="region">
<region end="5386" start="5376">chest pain</region>
</slot>
<slot name="_score_region" type="string"></slot>
<slot name="rule" type="string">HealthStatusItemPkg/0</slot>
<slot name="ConceptName" type="string">CHEST PAIN UNSPECIFIED</slot>
```

<slot name="\_score\_ConceptName" type="string"></slot>  
<slot name="SemanticType" type="string">Sign or Symptom</slot>  
<slot name="BodyLocations" type="string">CHEST</slot>  
<slot name="\_score\_BodyLocations" type="string"></slot>  
<slot name="SeverityStrings" type="string"></slot>  
<slot name="UMLS\_CUI" type="string">C1535568</slot>  
<slot name="DaysBeforeDeath" type="int">0</slot>  
<slot name="PAIN" type="string">Y</slot>  
<slot name="MaxPain" type="int">1</slot>  
<slot name="SeverityScale" type="int">1</slot>  
<slot name="\_score\_SeverityScale" type="string"></slot>  
<slot name="polarity" type="string">POSITIVE</slot>  
<slot name="DocType" type="string"></slot>  
<slot name="PatientID" type="int">0</slot>  
<slot name="DateObject" type="record"/>  
<slot name="enddate" type="date">  
<date day="13" month="1" year="1999"/>  
</slot>  
<slot name="\_score\_enddate" type="string"></slot>  
<slot name="startdate" type="date">  
<date day="13" month="1" year="1999"/>  
</slot>  
<slot name="\_score\_startdate" type="string"></slot>  
<slot name="Patient" type="string">PATIENT</slot>  
<slot name="\_score\_Patient" type="string"></slot>

```
<slot name="_keyref" type="record"/>
<slot name="_score" type="string"></slot>
<slot name="_type" type="string"></slot>
</record>
</records>
</infStore>
<?xml version="1.0" encoding="UTF-8"?>
<infStore>
<records>
<record id="0" template="HealthStatusRecord">
<slot name="ScoreType" type="string">HealthStatusRecord</slot>
<slot name="_score_ScoreType" type="string">CORRECT</slot>
<slot name="source" type="string">C:\i2b2 eval\Subsets\Test\628.txt</slot>
<slot name="_score_source" type="string">CORRECT</slot>
<slot name="region" type="region">
<region end="3001" start="2997">pain</region>
</slot>
<slot name="_score_region" type="string">CORRECT</slot>
<slot name="rule" type="string">HealthStatusItemPkg/0</slot>
<slot name="ConceptName" type="string">PAIN</slot>
<slot name="_score_ConceptName" type="string">CORRECT</slot>
<slot name="SemanticType" type="string">Sign or Symptom</slot>
<slot name="BodyLocations" type="string">KIDNEY URINARY SYSTEM</slot>
<slot name="_score_BodyLocations" type="string">CORRECT</slot>
<slot name="SeverityStrings" type="string"></slot>
```



```
<slot name="UMLS_CUI" type="string">C0030193</slot>
<slot name="DaysBeforeDeath" type="int">0</slot>
<slot name="PAIN" type="string">Y</slot>
<slot name="MaxPain" type="int">1</slot>
<slot name="SeverityScale" type="int">1</slot>
<slot name="_score_SeverityScale" type="string">CORRECT</slot>
<slot name="polarity" type="string">POSITIVE</slot>
<slot name="DocType" type="string"></slot>
<slot name="PatientID" type="int">0</slot>
<slot name="DateObject" type="record"/>
<slot name="enddate" type="date">
<date day="4" month="7" year="2000"/>
</slot>
<slot name="_score_enddate" type="string">CORRECT</slot>
<slot name="startdate" type="date">
<date day="4" month="7" year="2000"/>
</slot>
<slot name="_score_startdate" type="string">CORRECT</slot>
<slot name="Patient" type="string">PATIENT</slot>
<slot name="_score_Patient" type="string">CORRECT</slot>
<slot name="_keyref" type="record"/>
<slot name="_score" type="string">CORRECT</slot>
<slot name="_type" type="string"></slot>
</record>
<record id="1" template="HealthStatusRecord">
```

<slot name="ScoreType" type="string">HealthStatusRecord</slot>  
<slot name="\_score\_ScoreType" type="string"></slot>  
<slot name="source" type="string">C:\i2b2 eval\Subsets\Test\628.txt</slot>  
<slot name="\_score\_source" type="string"></slot>  
<slot name="region" type="region">  
<region end="2960" start="2950">flank pain</region>  
</slot>  
<slot name="\_score\_region" type="string"></slot>  
<slot name="rule" type="string">HealthStatusItemPkg/0</slot>  
<slot name="ConceptName" type="string">FLANK PAINS</slot>  
<slot name="\_score\_ConceptName" type="string"></slot>  
<slot name="SemanticType" type="string">Sign or Symptom</slot>  
<slot name="BodyLocations" type="string">FLANK</slot>  
<slot name="\_score\_BodyLocations" type="string"></slot>  
<slot name="SeverityStrings" type="string"></slot>  
<slot name="UMLS\_CUI" type="string">C0016199</slot>  
<slot name="DaysBeforeDeath" type="int">0</slot>  
<slot name="PAIN" type="string">Y</slot>  
<slot name="MaxPain" type="int">1</slot>  
<slot name="SeverityScale" type="int">1</slot>  
<slot name="\_score\_SeverityScale" type="string"></slot>  
<slot name="polarity" type="string">POSITIVE</slot>  
<slot name="DocType" type="string"></slot>  
<slot name="PatientID" type="int">0</slot>  
<slot name="DateObject" type="record"/>

```
<slot name="enddate" type="date">
<date day="4" month="7" year="2000"/>
</slot>
<slot name="_score_enddate" type="string"></slot>
<slot name="startdate" type="date">
<date day="4" month="7" year="2000"/>
</slot>
<slot name="_score_startdate" type="string"></slot>
<slot name="Patient" type="string">PATIENT</slot>
<slot name="_score_Patient" type="string"></slot>
<slot name="_keyref" type="record"/>
<slot name="_score" type="string"></slot>
<slot name="_type" type="string"></slot>
</record>
<record id="2" template="HealthStatusRecord">
<slot name="ScoreType" type="string">HealthStatusRecord</slot>
<slot name="_score_ScoreType" type="string"></slot>
<slot name="source" type="string">C:\i2b2 eval\Subsets\Test\628.txt</slot>
<slot name="_score_source" type="string"></slot>
<slot name="region" type="region">
<region end="1248" start="1234">abdominal pain</region>
</slot>
<slot name="_score_region" type="string"></slot>
<slot name="rule" type="string">HealthStatusItemPkg/0</slot>
<slot name="ConceptName" type="string">ABDOMINAL PAIN</slot>
```

<slot name="\_score\_ConceptName" type="string"></slot>  
<slot name="SemanticType" type="string">Sign or Symptom</slot>  
<slot name="BodyLocations" type="string">ABDOMEN</slot>  
<slot name="\_score\_BodyLocations" type="string"></slot>  
<slot name="SeverityStrings" type="string"></slot>  
<slot name="UMLS\_CUI" type="string">C0000737</slot>  
<slot name="DaysBeforeDeath" type="int">0</slot>  
<slot name="PAIN" type="string">Y</slot>  
<slot name="MaxPain" type="int">1</slot>  
<slot name="SeverityScale" type="int">1</slot>  
<slot name="\_score\_SeverityScale" type="string"></slot>  
<slot name="polarity" type="string">POSITIVE</slot>  
<slot name="DocType" type="string"></slot>  
<slot name="PatientID" type="int">0</slot>  
<slot name="DateObject" type="record"/>  
<slot name="enddate" type="date">  
<date day="31" month="5" year="1999"/>  
</slot>  
<slot name="\_score\_enddate" type="string"></slot>  
<slot name="startdate" type="date">  
<date day="1" month="5" year="1999"/>  
</slot>  
<slot name="\_score\_startdate" type="string"></slot>  
<slot name="Patient" type="string">PATIENT</slot>  
<slot name="\_score\_Patient" type="string"></slot>

```
<slot name="_keyref" type="record"/>
<slot name="_score" type="string"></slot>
<slot name="_type" type="string"></slot>
</record>
<record id="3" template="HealthStatusRecord">
<slot name="ScoreType" type="string">HealthStatusRecord</slot>
<slot name="_score_ScoreType" type="string"></slot>
<slot name="source" type="string">C:\i2b2 eval\Subsets\Test\628.txt</slot>
<slot name="_score_source" type="string"></slot>
<slot name="region" type="region">
<region end="3415" start="3405">tenderness</region>
</slot>
<slot name="_score_region" type="string"></slot>
<slot name="rule" type="string">HealthStatusItemPkg/0</slot>
<slot name="ConceptName" type="string">TENDERNESS</slot>
<slot name="_score_ConceptName" type="string"></slot>
<slot name="SemanticType" type="string">Sign or Symptom</slot>
<slot name="BodyLocations" type="string">JOINT</slot>
<slot name="_score_BodyLocations" type="string"></slot>
<slot name="SeverityStrings" type="string"></slot>
<slot name="UMLS_CUI" type="string">C0234233</slot>
<slot name="DaysBeforeDeath" type="int">0</slot>
<slot name="PAIN" type="string">Y</slot>
<slot name="MaxPain" type="int">1</slot>
<slot name="SeverityScale" type="int">0</slot>
```

```
<slot name="_score_SeverityScale" type="string"></slot>
<slot name="polarity" type="string">POSITIVE</slot>
<slot name="DocType" type="string"></slot>
<slot name="PatientID" type="int">0</slot>
<slot name="DateObject" type="record"/>
<slot name="enddate" type="date">
<date day="4" month="7" year="2000"/>
</slot>
<slot name="_score_enddate" type="string"></slot>
<slot name="startdate" type="date">
<date day="4" month="7" year="2000"/>
</slot>
<slot name="_score_startdate" type="string"></slot>
<slot name="Patient" type="string">PATIENT</slot>
<slot name="_score_Patient" type="string"></slot>
<slot name="_keyref" type="record"/>
<slot name="_score" type="string"></slot>
<slot name="_type" type="string"></slot>
</record>
<record id="4" template="HealthStatusRecord">
<slot name="ScoreType" type="string">HealthStatusRecord</slot>
<slot name="_score_ScoreType" type="string">CORRECT</slot>
<slot name="source" type="string">C:\i2b2 eval\Subsets\Test\628.txt</slot>
<slot name="_score_source" type="string">CORRECT</slot>
<slot name="region" type="region">
```

<region end="3415" start="3405">tenderness</region>  
</slot>  
<slot name="\_score\_region" type="string">CORRECT</slot>  
<slot name="rule" type="string">HealthStatusItemPkg/0</slot>  
<slot name="ConceptName" type="string">TENDERNESS</slot>  
<slot name="\_score\_ConceptName" type="string">CORRECT</slot>  
<slot name="SemanticType" type="string">Sign or Symptom</slot>  
<slot name="BodyLocations" type="string"></slot>  
<slot name="\_score\_BodyLocations" type="string">MISSING</slot>  
<slot name="SeverityStrings" type="string"></slot>  
<slot name="UMLS\_CUI" type="string">C0234233</slot>  
<slot name="DaysBeforeDeath" type="int">0</slot>  
<slot name="PAIN" type="string">Y</slot>  
<slot name="MaxPain" type="int">1</slot>  
<slot name="SeverityScale" type="int">1</slot>  
<slot name="\_score\_SeverityScale" type="string">INCORRECT</slot>  
<slot name="polarity" type="string">POSITIVE</slot>  
<slot name="DocType" type="string"></slot>  
<slot name="PatientID" type="int">0</slot>  
<slot name="DateObject" type="record"/>  
<slot name="enddate" type="date">  
<date day="4" month="7" year="2000"/>  
</slot>  
<slot name="\_score\_enddate" type="string">CORRECT</slot>  
<slot name="startdate" type="date">

```
<date day="4" month="7" year="2000"/>
</slot>
<slot name="_score_startdate" type="string">CORRECT</slot>
<slot name="Patient" type="string">PATIENT</slot>
<slot name="_score_Patient" type="string">CORRECT</slot>
<slot name="_keyref" type="record">
<record ref="3"/>
</slot>
<slot name="_score" type="string">INCORRECT</slot>
<slot name="_type" type="string"></slot>
</record>
<record id="5" template="HealthStatusRecord">
<slot name="ScoreType" type="string">HealthStatusRecord</slot>
<slot name="_score_ScoreType" type="string"></slot>
<slot name="source" type="string">C:\i2b2 eval\Subsets\Test\628.txt</slot>
<slot name="_score_source" type="string"></slot>
<slot name="region" type="region">
<region end="5113" start="5103">tenderness</region>
</slot>
<slot name="_score_region" type="string"></slot>
<slot name="rule" type="string">HealthStatusItemPkg/0</slot>
<slot name="ConceptName" type="string">LEFT FLANK PAINS</slot>
<slot name="_score_ConceptName" type="string"></slot>
<slot name="SemanticType" type="string">Sign or Symptom</slot>
```



<slot name="BodyLocations" type="string">LEFT LATERAL REGION OF ABDOMEN</slot>

<slot name="\_score\_BodyLocations" type="string"></slot>

<slot name="SeverityStrings" type="string">SOME</slot>

<slot name="UMLS\_CUI" type="string">C0423641</slot>

<slot name="DaysBeforeDeath" type="int">0</slot>

<slot name="PAIN" type="string">Y</slot>

<slot name="MaxPain" type="int">1</slot>

<slot name="SeverityScale" type="int">1</slot>

<slot name="\_score\_SeverityScale" type="string"></slot>

<slot name="polarity" type="string">POSITIVE</slot>

<slot name="DocType" type="string"></slot>

<slot name="PatientID" type="int">0</slot>

<slot name="DateObject" type="record"/>

<slot name="enddate" type="date">

<date day="4" month="7" year="2000"/>

</slot>

<slot name="\_score\_enddate" type="string"></slot>

<slot name="startdate" type="date">

<date day="4" month="7" year="2000"/>

</slot>

<slot name="\_score\_startdate" type="string"></slot>

<slot name="Patient" type="string">PATIENT</slot>

<slot name="\_score\_Patient" type="string"></slot>

<slot name="\_keyref" type="record"/>

```
<slot name="_score" type="string"></slot>
<slot name="_type" type="string"></slot>
</record>
<record id="6" template="HealthStatusRecord">
<slot name="ScoreType" type="string">HealthStatusRecord</slot>
<slot name="_score_ScoreType" type="string"></slot>
<slot name="source" type="string">C:\i2b2 eval\Subsets\Test\628.txt</slot>
<slot name="_score_source" type="string"></slot>
<slot name="region" type="region">
<region end="3531" start="3521">flank pain</region>
</slot>
<slot name="_score_region" type="string"></slot>
<slot name="rule" type="string">HealthStatusItemPkg/0</slot>
<slot name="ConceptName" type="string">ABDOMINAL PAIN</slot>
<slot name="_score_ConceptName" type="string"></slot>
<slot name="SemanticType" type="string">Sign or Symptom</slot>
<slot name="BodyLocations" type="string">ABDOMEN</slot>
<slot name="_score_BodyLocations" type="string"></slot>
<slot name="SeverityStrings" type="string"></slot>
<slot name="UMLS_CUI" type="string">C0000737</slot>
<slot name="DaysBeforeDeath" type="int">0</slot>
<slot name="PAIN" type="string">Y</slot>
<slot name="MaxPain" type="int">1</slot>
<slot name="SeverityScale" type="int">1</slot>
<slot name="_score_SeverityScale" type="string"></slot>
```

```
<slot name="polarity" type="string">POSITIVE</slot>
<slot name="DocType" type="string"></slot>
<slot name="PatientID" type="int">0</slot>
<slot name="DateObject" type="record"/>
<slot name="enddate" type="date">
<date day="4" month="7" year="2000"/>
</slot>
<slot name="_score_enddate" type="string"></slot>
<slot name="startdate" type="date">
<date day="4" month="7" year="2000"/>
</slot>
<slot name="_score_startdate" type="string"></slot>
<slot name="Patient" type="string">PATIENT</slot>
<slot name="_score_Patient" type="string"></slot>
<slot name="_keyref" type="record"/>
<slot name="_score" type="string"></slot>
<slot name="_type" type="string"></slot>
</record>
<record id="7" template="HealthStatusRecord">
<slot name="ScoreType" type="string">HealthStatusRecord</slot>
<slot name="_score_ScoreType" type="string"></slot>
<slot name="source" type="string">C:\i2b2 eval\Subsets\Test\628.txt</slot>
<slot name="_score_source" type="string"></slot>
<slot name="region" type="region">
<region end="2960" start="2950">flank pain</region>
```

```
</slot>
<slot name="_score_region" type="string"></slot>
<slot name="rule" type="string">HealthStatusItemPkg/0</slot>
<slot name="ConceptName" type="string">FLANK PAINS</slot>
<slot name="_score_ConceptName" type="string"></slot>
<slot name="SemanticType" type="string">Sign or Symptom</slot>
<slot name="BodyLocations" type="string">FLANK</slot>
<slot name="_score_BodyLocations" type="string"></slot>
<slot name="SeverityStrings" type="string"></slot>
<slot name="UMLS_CUI" type="string">C0016199</slot>
<slot name="DaysBeforeDeath" type="int">0</slot>
<slot name="PAIN" type="string">Y</slot>
<slot name="MaxPain" type="int">1</slot>
<slot name="SeverityScale" type="int">1</slot>
<slot name="_score_SeverityScale" type="string"></slot>
<slot name="polarity" type="string">POSITIVE</slot>
<slot name="DocType" type="string"></slot>
<slot name="PatientID" type="int">0</slot>
<slot name="DateObject" type="record"/>
<slot name="enddate" type="date">
<date day="4" month="7" year="2000"/>
</slot>
<slot name="_score_enddate" type="string"></slot>
<slot name="startdate" type="date">
<date day="4" month="7" year="2000"/>
```

```
</slot>
<slot name="_score_startdate" type="string"></slot>
<slot name="Patient" type="string">PATIENT</slot>
<slot name="_score_Patient" type="string"></slot>
<slot name="_keyref" type="record"/>
<slot name="_score" type="string"></slot>
<slot name="_type" type="string"></slot>
</record>
<record id="8" template="HealthStatusRecord">
<slot name="ScoreType" type="string">HealthStatusRecord</slot>
<slot name="_score_ScoreType" type="string">CORRECT</slot>
<slot name="source" type="string">C:\i2b2 eval\Subsets\Test\628.txt</slot>
<slot name="_score_source" type="string">CORRECT</slot>
<slot name="region" type="region">
<region end="2960" start="2950">flank pain</region>
</slot>
<slot name="_score_region" type="string">CORRECT</slot>
<slot name="rule" type="string">HealthStatusItemPkg/0</slot>
<slot name="ConceptName" type="string">FLANK PAINS</slot>
<slot name="_score_ConceptName" type="string">CORRECT</slot>
<slot name="SemanticType" type="string">Sign or Symptom</slot>
<slot name="BodyLocations" type="string"></slot>
<slot name="_score_BodyLocations" type="string">MISSING</slot>
<slot name="SeverityStrings" type="string"></slot>
<slot name="UMLS_CUI" type="string">C0016199</slot>
```

```
<slot name="DaysBeforeDeath" type="int">0</slot>
<slot name="PAIN" type="string">Y</slot>
<slot name="MaxPain" type="int">1</slot>
<slot name="SeverityScale" type="int">1</slot>
<slot name="_score_SeverityScale" type="string">CORRECT</slot>
<slot name="polarity" type="string">POSITIVE</slot>
<slot name="DocType" type="string"></slot>
<slot name="PatientID" type="int">0</slot>
<slot name="DateObject" type="record"/>
<slot name="enddate" type="date">
<date day="4" month="7" year="2000"/>
</slot>
<slot name="_score_enddate" type="string">CORRECT</slot>
<slot name="startdate" type="date">
<date day="4" month="7" year="2000"/>
</slot>
<slot name="_score_startdate" type="string">CORRECT</slot>
<slot name="Patient" type="string">PATIENT</slot>
<slot name="_score_Patient" type="string">CORRECT</slot>
<slot name="_keyref" type="record">
<record ref="7"/>
</slot>
<slot name="_score" type="string">INCORRECT</slot>
<slot name="_type" type="string"></slot>
</record>
```

```
<record id="9" template="HealthStatusRecord">
  <slot name="ScoreType" type="string">HealthStatusRecord</slot>
  <slot name="_score_ScoreType" type="string"></slot>
  <slot name="source" type="string">C:\i2b2 eval\Subsets\Test\628.txt</slot>
  <slot name="_score_source" type="string"></slot>
  <slot name="region" type="region">
    <region end="3193" start="3184">headaches</region>
  </slot>
  <slot name="_score_region" type="string"></slot>
  <slot name="rule" type="string">HealthStatusItemPkg/0</slot>
  <slot name="ConceptName" type="string">FRONTAL HEADACHE</slot>
  <slot name="_score_ConceptName" type="string"></slot>
  <slot name="SemanticType" type="string">Sign or Symptom</slot>
  <slot name="BodyLocations" type="string">HEAD</slot>
  <slot name="_score_BodyLocations" type="string"></slot>
  <slot name="SeverityStrings" type="string">DENIES</slot>
  <slot name="UMLS_CUI" type="string">C2004251</slot>
  <slot name="DaysBeforeDeath" type="int">0</slot>
  <slot name="PAIN" type="string">Y</slot>
  <slot name="MaxPain" type="int">1</slot>
  <slot name="SeverityScale" type="int">0</slot>
  <slot name="_score_SeverityScale" type="string"></slot>
  <slot name="polarity" type="string">POSITIVE</slot>
  <slot name="DocType" type="string"></slot>
  <slot name="PatientID" type="int">0</slot>
```

```
<slot name="DateObject" type="record"/>
<slot name="enddate" type="date">
<date day="4" month="7" year="2000"/>
</slot>
<slot name="_score_enddate" type="string"></slot>
<slot name="startdate" type="date">
<date day="4" month="7" year="2000"/>
</slot>
<slot name="_score_startdate" type="string"></slot>
<slot name="Patient" type="string">PATIENT</slot>
<slot name="_score_Patient" type="string"></slot>
<slot name="_keyref" type="record"/>
<slot name="_score" type="string"></slot>
<slot name="_type" type="string"></slot>
</record>
<record id="10" template="HealthStatusRecord">
<slot name="ScoreType" type="string">HealthStatusRecord</slot>
<slot name="_score_ScoreType" type="string"></slot>
<slot name="source" type="string">C:\i2b2 eval\Subsets\Test\628.txt</slot>
<slot name="_score_source" type="string"></slot>
<slot name="region" type="region">
<region end="1908" start="1883">left sided abdominal pain</region>
</slot>
<slot name="_score_region" type="string"></slot>
<slot name="rule" type="string">HealthStatusItemPkg/0</slot>
```



<slot name="ConceptName" type="string">LEFT SIDED ABDOMINAL PAIN</slot>  
<slot name="\_score\_ConceptName" type="string"></slot>  
<slot name="SemanticType" type="string">Sign or Symptom</slot>  
<slot name="BodyLocations" type="string">ABDOMEN</slot>  
<slot name="\_score\_BodyLocations" type="string"></slot>  
<slot name="SeverityStrings" type="string"></slot>  
<slot name="UMLS\_CUI" type="string">C0563276</slot>  
<slot name="DaysBeforeDeath" type="int">0</slot>  
<slot name="PAIN" type="string">Y</slot>  
<slot name="MaxPain" type="int">1</slot>  
<slot name="SeverityScale" type="int">1</slot>  
<slot name="\_score\_SeverityScale" type="string"></slot>  
<slot name="polarity" type="string">POSITIVE</slot>  
<slot name="DocType" type="string"></slot>  
<slot name="PatientID" type="int">0</slot>  
<slot name="DateObject" type="record"/>  
<slot name="enddate" type="date">  
<date day="16" month="6" year="2000"/>  
</slot>  
<slot name="\_score\_enddate" type="string"></slot>  
<slot name="startdate" type="date">  
<date day="16" month="6" year="2000"/>  
</slot>  
<slot name="\_score\_startdate" type="string"></slot>  
<slot name="Patient" type="string">PATIENT</slot>

```
<slot name="_score_Patient" type="string"></slot>
<slot name="_keyref" type="record"/>
<slot name="_score" type="string"></slot>
<slot name="_type" type="string"></slot>
</record>
<record id="11" template="HealthStatusRecord">
<slot name="ScoreType" type="string">HealthStatusRecord</slot>
<slot name="_score_ScoreType" type="string">CORRECT</slot>
<slot name="source" type="string">C:\i2b2 eval\Subsets\Test\628.txt</slot>
<slot name="_score_source" type="string">CORRECT</slot>
<slot name="region" type="region">
<region end="1908" start="1883">left sided abdominal pain</region>
</slot>
<slot name="_score_region" type="string">CORRECT</slot>
<slot name="rule" type="string">HealthStatusItemPkg/0</slot>
<slot name="ConceptName" type="string">LEFT SIDED ABDOMINAL PAIN</slot>
<slot name="_score_ConceptName" type="string">CORRECT</slot>
<slot name="SemanticType" type="string">Sign or Symptom</slot>
<slot name="BodyLocations" type="string"></slot>
<slot name="_score_BodyLocations" type="string">MISSING</slot>
<slot name="SeverityStrings" type="string"></slot>
<slot name="UMLS_CUI" type="string">C0563276</slot>
<slot name="DaysBeforeDeath" type="int">0</slot>
<slot name="PAIN" type="string">Y</slot>
<slot name="MaxPain" type="int">1</slot>
```

```
<slot name="SeverityScale" type="int">1</slot>
<slot name="_score_SeverityScale" type="string">CORRECT</slot>
<slot name="polarity" type="string">POSITIVE</slot>
<slot name="DocType" type="string"></slot>
<slot name="PatientID" type="int">0</slot>
<slot name="DateObject" type="record"/>
<slot name="enddate" type="date">
<date day="16" month="6" year="2000"/>
</slot>
<slot name="_score_enddate" type="string">CORRECT</slot>
<slot name="startdate" type="date">
<date day="16" month="6" year="2000"/>
</slot>
<slot name="_score_startdate" type="string">CORRECT</slot>
<slot name="Patient" type="string">PATIENT</slot>
<slot name="_score_Patient" type="string">CORRECT</slot>
<slot name="_keyref" type="record">
<record ref="10"/>
</slot>
<slot name="_score" type="string">INCORRECT</slot>
<slot name="_type" type="string"></slot>
</record>
<record id="12" template="HealthStatusRecord">
<slot name="ScoreType" type="string">HealthStatusRecord</slot>
<slot name="_score_ScoreType" type="string"></slot>
```

<slot name="source" type="string">C:\i2b2 eval\Subsets\Test\628.txt</slot>  
<slot name="\_score\_source" type="string"></slot>  
<slot name="region" type="region">  
<region end="5005" start="4995">tenderness</region>  
</slot>  
<slot name="\_score\_region" type="string"></slot>  
<slot name="rule" type="string">HealthStatusItemPkg/0</slot>  
<slot name="ConceptName" type="string">TENDERNESS</slot>  
<slot name="\_score\_ConceptName" type="string"></slot>  
<slot name="SemanticType" type="string">Sign or Symptom</slot>  
<slot name="BodyLocations" type="string">FLANK</slot>  
<slot name="\_score\_BodyLocations" type="string"></slot>  
<slot name="SeverityStrings" type="string"></slot>  
<slot name="UMLS\_CUI" type="string">C0234233</slot>  
<slot name="DaysBeforeDeath" type="int">0</slot>  
<slot name="PAIN" type="string">Y</slot>  
<slot name="MaxPain" type="int">1</slot>  
<slot name="SeverityScale" type="int">1</slot>  
<slot name="\_score\_SeverityScale" type="string"></slot>  
<slot name="polarity" type="string">POSITIVE</slot>  
<slot name="DocType" type="string"></slot>  
<slot name="PatientID" type="int">0</slot>  
<slot name="DateObject" type="record"/>  
<slot name="enddate" type="date">  
<date day="4" month="7" year="2000"/>

```
</slot>
<slot name="_score_enddate" type="string"></slot>
<slot name="startdate" type="date">
<date day="4" month="7" year="2000"/>
</slot>
<slot name="_score_startdate" type="string"></slot>
<slot name="Patient" type="string">PATIENT</slot>
<slot name="_score_Patient" type="string"></slot>
<slot name="_keyref" type="record"/>
<slot name="_score" type="string"></slot>
<slot name="_type" type="string"></slot>
</record>
<record id="13" template="HealthStatusRecord">
<slot name="ScoreType" type="string">HealthStatusRecord</slot>
<slot name="_score_ScoreType" type="string">CORRECT</slot>
<slot name="source" type="string">C:\i2b2 eval\Subsets\Test\628.txt</slot>
<slot name="_score_source" type="string">CORRECT</slot>
<slot name="region" type="region">
<region end="579" start="575">pain</region>
</slot>
<slot name="_score_region" type="string">CORRECT</slot>
<slot name="rule" type="string">HealthStatusItemPkg/0</slot>
<slot name="ConceptName" type="string">PAIN</slot>
<slot name="_score_ConceptName" type="string">CORRECT</slot>
<slot name="SemanticType" type="string">Sign or Symptom</slot>
```

<slot name="BodyLocations" type="string">LEFT KIDNEY STRUCTURE</slot>  
<slot name="\_score\_BodyLocations" type="string">CORRECT</slot>  
<slot name="SeverityStrings" type="string"></slot>  
<slot name="UMLS\_CUI" type="string">C0030193</slot>  
<slot name="DaysBeforeDeath" type="int">0</slot>  
<slot name="PAIN" type="string">Y</slot>  
<slot name="MaxPain" type="int">1</slot>  
<slot name="SeverityScale" type="int">1</slot>  
<slot name="\_score\_SeverityScale" type="string">CORRECT</slot>  
<slot name="polarity" type="string">POSITIVE</slot>  
<slot name="DocType" type="string"></slot>  
<slot name="PatientID" type="int">0</slot>  
<slot name="DateObject" type="record"/>  
<slot name="enddate" type="date">  
<date day="4" month="7" year="2000"/>  
</slot>  
<slot name="\_score\_enddate" type="string">CORRECT</slot>  
<slot name="startdate" type="date">  
<date day="4" month="7" year="2000"/>  
</slot>  
<slot name="\_score\_startdate" type="string">CORRECT</slot>  
<slot name="Patient" type="string">PATIENT</slot>  
<slot name="\_score\_Patient" type="string">CORRECT</slot>  
<slot name="\_keyref" type="record"/>  
<slot name="\_score" type="string">CORRECT</slot>

```
<slot name="_type" type="string"></slot>
</record>
<record id="14" template="HealthStatusRecord">
  <slot name="ScoreType" type="string">HealthStatusRecord</slot>
  <slot name="_score_ScoreType" type="string">CORRECT</slot>
  <slot name="source" type="string">C:\i2b2 eval\Subsets\Test\628.txt</slot>
  <slot name="_score_source" type="string">CORRECT</slot>
  <slot name="region" type="region">
    <region end="337" start="323">abdominal pain</region>
  </slot>
  <slot name="_score_region" type="string">CORRECT</slot>
  <slot name="rule" type="string">HealthStatusItemPkg/0</slot>
  <slot name="ConceptName" type="string">ABDOMINAL PAIN</slot>
  <slot name="_score_ConceptName" type="string">CORRECT</slot>
  <slot name="SemanticType" type="string">Sign or Symptom</slot>
  <slot name="BodyLocations" type="string">ABDOMEN</slot>
  <slot name="_score_BodyLocations" type="string">CORRECT</slot>
  <slot name="SeverityStrings" type="string"></slot>
  <slot name="UMLS_CUI" type="string">C0000737</slot>
  <slot name="DaysBeforeDeath" type="int">0</slot>
  <slot name="PAIN" type="string">Y</slot>
  <slot name="MaxPain" type="int">1</slot>
  <slot name="SeverityScale" type="int">1</slot>
  <slot name="_score_SeverityScale" type="string">CORRECT</slot>
  <slot name="polarity" type="string">POSITIVE</slot>
```

```
<slot name="DocType" type="string"></slot>
<slot name="PatientID" type="int">0</slot>
<slot name="DateObject" type="record"/>
<slot name="enddate" type="date">
<date day="4" month="7" year="2000"/>
</slot>
<slot name="_score_enddate" type="string">CORRECT</slot>
<slot name="startdate" type="date">
<date day="4" month="7" year="2000"/>
</slot>
<slot name="_score_startdate" type="string">CORRECT</slot>
<slot name="Patient" type="string">PATIENT</slot>
<slot name="_score_Patient" type="string">CORRECT</slot>
<slot name="_keyref" type="record"/>
<slot name="_score" type="string">CORRECT</slot>
<slot name="_type" type="string"></slot>
</record>
<record id="15" template="HealthStatusRecord">
<slot name="ScoreType" type="string">HealthStatusRecord</slot>
<slot name="_score_ScoreType" type="string">SPURIOUS</slot>
<slot name="source" type="string">C:\i2b2 eval\Subsets\Test\628.txt</slot>
<slot name="_score_source" type="string">SPURIOUS</slot>
<slot name="region" type="region">
<region end="6223" start="6219">pain</region>
</slot>
```



<slot name="\_score\_region" type="string">SPURIOUS</slot>  
<slot name="rule" type="string">HealthStatusItemPkg/0</slot>  
<slot name="ConceptName" type="string">PAIN</slot>  
<slot name="\_score\_ConceptName" type="string">SPURIOUS</slot>  
<slot name="SemanticType" type="string">Sign or Symptom</slot>  
<slot name="BodyLocations" type="string"></slot>  
<slot name="\_score\_BodyLocations" type="string"></slot>  
<slot name="SeverityStrings" type="string"></slot>  
<slot name="UMLS\_CUI" type="string">C0030193</slot>  
<slot name="DaysBeforeDeath" type="int">0</slot>  
<slot name="PAIN" type="string">Y</slot>  
<slot name="MaxPain" type="int">1</slot>  
<slot name="SeverityScale" type="int">1</slot>  
<slot name="\_score\_SeverityScale" type="string">SPURIOUS</slot>  
<slot name="polarity" type="string">POSITIVE</slot>  
<slot name="DocType" type="string"></slot>  
<slot name="PatientID" type="int">0</slot>  
<slot name="DateObject" type="record"/>  
<slot name="enddate" type="date">  
<date day="4" month="7" year="2000"/>  
</slot>  
<slot name="\_score\_enddate" type="string">SPURIOUS</slot>  
<slot name="startdate" type="date">  
<date day="4" month="7" year="2000"/>  
</slot>

```
<slot name="_score_startdate" type="string">SPURIOUS</slot>
<slot name="Patient" type="string">PATIENT</slot>
<slot name="_score_Patient" type="string">SPURIOUS</slot>
<slot name="_keyref" type="record"/>
<slot name="_score" type="string">SPURIOUS</slot>
<slot name="_type" type="string"></slot>
</record>
<record id="16" template="HealthStatusRecord">
<slot name="ScoreType" type="string">HealthStatusRecord</slot>
<slot name="_score_ScoreType" type="string"></slot>
<slot name="source" type="string">C:\i2b2 eval\Subsets\Test\628.txt</slot>
<slot name="_score_source" type="string"></slot>
<slot name="region" type="region">
<region end="5113" start="5103">tenderness</region>
</slot>
<slot name="_score_region" type="string"></slot>
<slot name="rule" type="string">HealthStatusItemPkg/0</slot>
<slot name="ConceptName" type="string">LEFT FLANK PAINS</slot>
<slot name="_score_ConceptName" type="string"></slot>
<slot name="SemanticType" type="string">Sign or Symptom</slot>
<slot name="BodyLocations" type="string">LEFT LATERAL REGION OF
ABDOMEN</slot>
<slot name="_score_BodyLocations" type="string"></slot>
<slot name="SeverityStrings" type="string">SOME</slot>
<slot name="UMLS_CUI" type="string">C0423641</slot>
```

```
<slot name="DaysBeforeDeath" type="int">0</slot>
<slot name="PAIN" type="string">Y</slot>
<slot name="MaxPain" type="int">1</slot>
<slot name="SeverityScale" type="int">1</slot>
<slot name="_score_SeverityScale" type="string"></slot>
<slot name="polarity" type="string">POSITIVE</slot>
<slot name="DocType" type="string"></slot>
<slot name="PatientID" type="int">0</slot>
<slot name="DateObject" type="record"/>
<slot name="enddate" type="date">
<date day="4" month="7" year="2000"/>
</slot>
<slot name="_score_enddate" type="string"></slot>
<slot name="startdate" type="date">
<date day="4" month="7" year="2000"/>
</slot>
<slot name="_score_startdate" type="string"></slot>
<slot name="Patient" type="string">PATIENT</slot>
<slot name="_score_Patient" type="string"></slot>
<slot name="_keyref" type="record"/>
<slot name="_score" type="string"></slot>
<slot name="_type" type="string"></slot>
</record>
<record id="17" template="HealthStatusRecord">
<slot name="ScoreType" type="string">HealthStatusRecord</slot>
```

<slot name="\_score\_ScoreType" type="string">CORRECT</slot>  
<slot name="source" type="string">C:\i2b2 eval\Subsets\Test\628.txt</slot>  
<slot name="\_score\_source" type="string">CORRECT</slot>  
<slot name="region" type="region">  
<region end="5113" start="5103">tenderness</region>  
</slot>  
<slot name="\_score\_region" type="string">CORRECT</slot>  
<slot name="rule" type="string">HealthStatusItemPkg/0</slot>  
<slot name="ConceptName" type="string">TENDERNESS</slot>  
<slot name="\_score\_ConceptName" type="string">INCORRECT</slot>  
<slot name="SemanticType" type="string">Sign or Symptom</slot>  
<slot name="BodyLocations" type="string">LEFT LATERAL REGION OF ABDOMEN</slot>  
<slot name="\_score\_BodyLocations" type="string">CORRECT</slot>  
<slot name="SeverityStrings" type="string">SOME</slot>  
<slot name="UMLS\_CUI" type="string">C0234233</slot>  
<slot name="DaysBeforeDeath" type="int">0</slot>  
<slot name="PAIN" type="string">Y</slot>  
<slot name="MaxPain" type="int">1</slot>  
<slot name="SeverityScale" type="int">1</slot>  
<slot name="\_score\_SeverityScale" type="string">CORRECT</slot>  
<slot name="polarity" type="string">POSITIVE</slot>  
<slot name="DocType" type="string"></slot>  
<slot name="PatientID" type="int">0</slot>  
<slot name="DateObject" type="record"/>

```
<slot name="enddate" type="date">
<date day="4" month="7" year="2000"/>
</slot>
<slot name="_score_enddate" type="string">CORRECT</slot>
<slot name="startdate" type="date">
<date day="4" month="7" year="2000"/>
</slot>
<slot name="_score_startdate" type="string">CORRECT</slot>
<slot name="Patient" type="string">PATIENT</slot>
<slot name="_score_Patient" type="string">CORRECT</slot>
<slot name="_keyref" type="record">
<record ref="16"/>
</slot>
<slot name="_score" type="string">INCORRECT</slot>
<slot name="_type" type="string"></slot>
</record>
<record id="18" template="HealthStatusRecord">
<slot name="ScoreType" type="string">HealthStatusRecord</slot>
<slot name="_score_ScoreType" type="string"></slot>
<slot name="source" type="string">C:\i2b2 eval\Subsets\Test\628.txt</slot>
<slot name="_score_source" type="string"></slot>
<slot name="region" type="region">
<region end="5005" start="4995">tenderness</region>
</slot>
<slot name="_score_region" type="string"></slot>
```

<slot name="rule" type="string">HealthStatusItemPkg/0</slot>  
<slot name="ConceptName" type="string">TENDERNESS</slot>  
<slot name="\_score\_ConceptName" type="string"></slot>  
<slot name="SemanticType" type="string">Sign or Symptom</slot>  
<slot name="BodyLocations" type="string">FLANK</slot>  
<slot name="\_score\_BodyLocations" type="string"></slot>  
<slot name="SeverityStrings" type="string"></slot>  
<slot name="UMLS\_CUI" type="string">C0234233</slot>  
<slot name="DaysBeforeDeath" type="int">0</slot>  
<slot name="PAIN" type="string">Y</slot>  
<slot name="MaxPain" type="int">1</slot>  
<slot name="SeverityScale" type="int">1</slot>  
<slot name="\_score\_SeverityScale" type="string"></slot>  
<slot name="polarity" type="string">POSITIVE</slot>  
<slot name="DocType" type="string"></slot>  
<slot name="PatientID" type="int">0</slot>  
<slot name="DateObject" type="record"/>  
<slot name="enddate" type="date">  
<date day="4" month="7" year="2000"/>  
</slot>  
<slot name="\_score\_enddate" type="string"></slot>  
<slot name="startdate" type="date">  
<date day="4" month="7" year="2000"/>  
</slot>  
<slot name="\_score\_startdate" type="string"></slot>

```
<slot name="Patient" type="string">PATIENT</slot>
<slot name="_score_Patient" type="string"></slot>
<slot name="_keyref" type="record"/>
<slot name="_score" type="string"></slot>
<slot name="_type" type="string"></slot>
</record>
<record id="19" template="HealthStatusRecord">
<slot name="ScoreType" type="string">HealthStatusRecord</slot>
<slot name="_score_ScoreType" type="string">CORRECT</slot>
<slot name="source" type="string">C:\i2b2 eval\Subsets\Test\628.txt</slot>
<slot name="_score_source" type="string">CORRECT</slot>
<slot name="region" type="region">
<region end="5005" start="4995">tenderness</region>
</slot>
<slot name="_score_region" type="string">CORRECT</slot>
<slot name="rule" type="string">HealthStatusItemPkg/0</slot>
<slot name="ConceptName" type="string">TENDERNESS</slot>
<slot name="_score_ConceptName" type="string">CORRECT</slot>
<slot name="SemanticType" type="string">Sign or Symptom</slot>
<slot name="BodyLocations" type="string"></slot>
<slot name="_score_BodyLocations" type="string">MISSING</slot>
<slot name="SeverityStrings" type="string"></slot>
<slot name="UMLS_CUI" type="string">C0234233</slot>
<slot name="DaysBeforeDeath" type="int">0</slot>
<slot name="PAIN" type="string">Y</slot>
```

```
<slot name="MaxPain" type="int">1</slot>
<slot name="SeverityScale" type="int">1</slot>
<slot name="_score_SeverityScale" type="string">CORRECT</slot>
<slot name="polarity" type="string">POSITIVE</slot>
<slot name="DocType" type="string"></slot>
<slot name="PatientID" type="int">0</slot>
<slot name="DateObject" type="record"/>
<slot name="enddate" type="date">
<date day="4" month="7" year="2000"/>
</slot>
<slot name="_score_enddate" type="string">CORRECT</slot>
<slot name="startdate" type="date">
<date day="4" month="7" year="2000"/>
</slot>
<slot name="_score_startdate" type="string">CORRECT</slot>
<slot name="Patient" type="string">PATIENT</slot>
<slot name="_score_Patient" type="string">CORRECT</slot>
<slot name="_keyref" type="record">
<record ref="18"/>
</slot>
<slot name="_score" type="string">INCORRECT</slot>
<slot name="_type" type="string"></slot>
</record>
<record id="20" template="HealthStatusRecord">
<slot name="ScoreType" type="string">HealthStatusRecord</slot>
```



<slot name="\_score\_ScoreType" type="string"></slot>  
<slot name="source" type="string">C:\i2b2 eval\Subsets\Test\628.txt</slot>  
<slot name="\_score\_source" type="string"></slot>  
<slot name="region" type="region">  
<region end="3531" start="3521">flank pain</region>  
</slot>  
<slot name="\_score\_region" type="string"></slot>  
<slot name="rule" type="string">HealthStatusItemPkg/0</slot>  
<slot name="ConceptName" type="string">ABDOMINAL PAIN</slot>  
<slot name="\_score\_ConceptName" type="string"></slot>  
<slot name="SemanticType" type="string">Sign or Symptom</slot>  
<slot name="BodyLocations" type="string">ABDOMEN</slot>  
<slot name="\_score\_BodyLocations" type="string"></slot>  
<slot name="SeverityStrings" type="string"></slot>  
<slot name="UMLS\_CUI" type="string">C0000737</slot>  
<slot name="DaysBeforeDeath" type="int">0</slot>  
<slot name="PAIN" type="string">Y</slot>  
<slot name="MaxPain" type="int">1</slot>  
<slot name="SeverityScale" type="int">1</slot>  
<slot name="\_score\_SeverityScale" type="string"></slot>  
<slot name="polarity" type="string">POSITIVE</slot>  
<slot name="DocType" type="string"></slot>  
<slot name="PatientID" type="int">0</slot>  
<slot name="DateObject" type="record"/>  
<slot name="enddate" type="date">

```
<date day="4" month="7" year="2000"/>
</slot>
<slot name="_score_enddate" type="string"></slot>
<slot name="startdate" type="date">
<date day="4" month="7" year="2000"/>
</slot>
<slot name="_score_startdate" type="string"></slot>
<slot name="Patient" type="string">PATIENT</slot>
<slot name="_score_Patient" type="string"></slot>
<slot name="_keyref" type="record"/>
<slot name="_score" type="string"></slot>
<slot name="_type" type="string"></slot>
</record>
<record id="21" template="HealthStatusRecord">
<slot name="ScoreType" type="string">HealthStatusRecord</slot>
<slot name="_score_ScoreType" type="string">CORRECT</slot>
<slot name="source" type="string">C:\i2b2 eval\Subsets\Test\628.txt</slot>
<slot name="_score_source" type="string">CORRECT</slot>
<slot name="region" type="region">
<region end="3531" start="3521">flank pain</region>
</slot>
<slot name="_score_region" type="string">CORRECT</slot>
<slot name="rule" type="string">HealthStatusItemPkg/0</slot>
<slot name="ConceptName" type="string">FLANK PAINS</slot>
<slot name="_score_ConceptName" type="string">INCORRECT</slot>
```

<slot name="SemanticType" type="string">Sign or Symptom</slot>  
<slot name="BodyLocations" type="string">ABDOMEN</slot>  
<slot name="\_score\_BodyLocations" type="string">CORRECT</slot>  
<slot name="SeverityStrings" type="string"></slot>  
<slot name="UMLS\_CUI" type="string">C0016199</slot>  
<slot name="DaysBeforeDeath" type="int">0</slot>  
<slot name="PAIN" type="string">Y</slot>  
<slot name="MaxPain" type="int">1</slot>  
<slot name="SeverityScale" type="int">1</slot>  
<slot name="\_score\_SeverityScale" type="string">CORRECT</slot>  
<slot name="polarity" type="string">POSITIVE</slot>  
<slot name="DocType" type="string"></slot>  
<slot name="PatientID" type="int">0</slot>  
<slot name="DateObject" type="record"/>  
<slot name="enddate" type="date">  
<date day="4" month="7" year="2000"/>  
</slot>  
<slot name="\_score\_enddate" type="string">CORRECT</slot>  
<slot name="startdate" type="date">  
<date day="4" month="7" year="2000"/>  
</slot>  
<slot name="\_score\_startdate" type="string">CORRECT</slot>  
<slot name="Patient" type="string">PATIENT</slot>  
<slot name="\_score\_Patient" type="string">CORRECT</slot>  
<slot name="\_keyref" type="record">

```
<record ref="20"/>
</slot>
<slot name="_score" type="string">INCORRECT</slot>
<slot name="_type" type="string"></slot>
</record>
<record id="22" template="HealthStatusRecord">
<slot name="ScoreType" type="string">HealthStatusRecord</slot>
<slot name="_score_ScoreType" type="string">CORRECT</slot>
<slot name="source" type="string">C:\i2b2 eval\Subsets\Test\628.txt</slot>
<slot name="_score_source" type="string">CORRECT</slot>
<slot name="region" type="region">
<region end="3314" start="3300">abdominal pain</region>
</slot>
<slot name="_score_region" type="string">CORRECT</slot>
<slot name="rule" type="string">HealthStatusItemPkg/0</slot>
<slot name="ConceptName" type="string">ABDOMINAL PAIN</slot>
<slot name="_score_ConceptName" type="string">CORRECT</slot>
<slot name="SemanticType" type="string">Sign or Symptom</slot>
<slot name="BodyLocations" type="string">ABDOMEN</slot>
<slot name="_score_BodyLocations" type="string">CORRECT</slot>
<slot name="SeverityStrings" type="string">NO</slot>
<slot name="UMLS_CUI" type="string">C0000737</slot>
<slot name="DaysBeforeDeath" type="int">0</slot>
<slot name="PAIN" type="string">Y</slot>
<slot name="MaxPain" type="int">1</slot>
```

```
<slot name="SeverityScale" type="int">0</slot>
<slot name="_score_SeverityScale" type="string">CORRECT</slot>
<slot name="polarity" type="string">POSITIVE</slot>
<slot name="DocType" type="string"></slot>
<slot name="PatientID" type="int">0</slot>
<slot name="DateObject" type="record"/>
<slot name="enddate" type="date">
<date day="4" month="7" year="2000"/>
</slot>
<slot name="_score_enddate" type="string">CORRECT</slot>
<slot name="startdate" type="date">
<date day="4" month="7" year="2000"/>
</slot>
<slot name="_score_startdate" type="string">CORRECT</slot>
<slot name="Patient" type="string">PATIENT</slot>
<slot name="_score_Patient" type="string">CORRECT</slot>
<slot name="_keyref" type="record"/>
<slot name="_score" type="string">CORRECT</slot>
<slot name="_type" type="string"></slot>
</record>
<record id="23" template="HealthStatusRecord">
<slot name="ScoreType" type="string">HealthStatusRecord</slot>
<slot name="_score_ScoreType" type="string"></slot>
<slot name="source" type="string">C:\i2b2 eval\Subsets\Test\628.txt</slot>
<slot name="_score_source" type="string"></slot>
```

```
<slot name="region" type="region">
<region end="1248" start="1234">abdominal pain</region>
</slot>
<slot name="_score_region" type="string"></slot>
<slot name="rule" type="string">HealthStatusItemPkg/0</slot>
<slot name="ConceptName" type="string">ABDOMINAL PAIN</slot>
<slot name="_score_ConceptName" type="string"></slot>
<slot name="SemanticType" type="string">Sign or Symptom</slot>
<slot name="BodyLocations" type="string">ABDOMEN</slot>
<slot name="_score_BodyLocations" type="string"></slot>
<slot name="SeverityStrings" type="string"></slot>
<slot name="UMLS_CUI" type="string">C0000737</slot>
<slot name="DaysBeforeDeath" type="int">0</slot>
<slot name="PAIN" type="string">Y</slot>
<slot name="MaxPain" type="int">1</slot>
<slot name="SeverityScale" type="int">1</slot>
<slot name="_score_SeverityScale" type="string"></slot>
<slot name="polarity" type="string">POSITIVE</slot>
<slot name="DocType" type="string"></slot>
<slot name="PatientID" type="int">0</slot>
<slot name="DateObject" type="record"/>
<slot name="enddate" type="date">
<date day="31" month="5" year="1999"/>
</slot>
<slot name="_score_enddate" type="string"></slot>
```

```
<slot name="startdate" type="date">
<date day="1" month="5" year="1999"/>
</slot>
<slot name="_score_startdate" type="string"></slot>
<slot name="Patient" type="string">PATIENT</slot>
<slot name="_score_Patient" type="string"></slot>
<slot name="_keyref" type="record"/>
<slot name="_score" type="string"></slot>
<slot name="_type" type="string"></slot>
</record>
<record id="24" template="HealthStatusRecord">
<slot name="ScoreType" type="string">HealthStatusRecord</slot>
<slot name="_score_ScoreType" type="string">CORRECT</slot>
<slot name="source" type="string">C:\i2b2 eval\Subsets\Test\628.txt</slot>
<slot name="_score_source" type="string">CORRECT</slot>
<slot name="region" type="region">
<region end="1248" start="1234">abdominal pain</region>
</slot>
<slot name="_score_region" type="string">CORRECT</slot>
<slot name="rule" type="string">HealthStatusItemPkg/0</slot>
<slot name="ConceptName" type="string">ABDOMINAL PAIN</slot>
<slot name="_score_ConceptName" type="string">CORRECT</slot>
<slot name="SemanticType" type="string">Sign or Symptom</slot>
<slot name="BodyLocations" type="string">ABDOMEN</slot>
<slot name="_score_BodyLocations" type="string">CORRECT</slot>
```

<slot name="SeverityStrings" type="string"></slot>  
<slot name="UMLS\_CUI" type="string">C0000737</slot>  
<slot name="DaysBeforeDeath" type="int">0</slot>  
<slot name="PAIN" type="string">Y</slot>  
<slot name="MaxPain" type="int">1</slot>  
<slot name="SeverityScale" type="int">1</slot>  
<slot name="\_score\_SeverityScale" type="string">CORRECT</slot>  
<slot name="polarity" type="string">POSITIVE</slot>  
<slot name="DocType" type="string"></slot>  
<slot name="PatientID" type="int">0</slot>  
<slot name="DateObject" type="record"/>  
<slot name="enddate" type="date">  
<date day="4" month="7" year="2000"/>  
</slot>  
<slot name="\_score\_enddate" type="string">INCORRECT</slot>  
<slot name="startdate" type="date">  
<date day="4" month="7" year="2000"/>  
</slot>  
<slot name="\_score\_startdate" type="string">INCORRECT</slot>  
<slot name="Patient" type="string">PATIENT</slot>  
<slot name="\_score\_Patient" type="string">CORRECT</slot>  
<slot name="\_keyref" type="record">  
<record ref="23"/>  
</slot>  
<slot name="\_score" type="string">INCORRECT</slot>



```
<slot name="_type" type="string"></slot>
</record>
<record id="25" template="HealthStatusRecord">
<slot name="ScoreType" type="string">HealthStatusRecord</slot>
<slot name="_score_ScoreType" type="string"></slot>
<slot name="source" type="string">C:\i2b2 eval\Subsets\Test\628.txt</slot>
<slot name="_score_source" type="string"></slot>
<slot name="region" type="region">
<region end="1908" start="1883">left sided abdominal pain</region>
</slot>
<slot name="_score_region" type="string"></slot>
<slot name="rule" type="string">HealthStatusItemPkg/0</slot>
<slot name="ConceptName" type="string">LEFT SIDED ABDOMINAL PAIN</slot>
<slot name="_score_ConceptName" type="string"></slot>
<slot name="SemanticType" type="string">Sign or Symptom</slot>
<slot name="BodyLocations" type="string">ABDOMEN</slot>
<slot name="_score_BodyLocations" type="string"></slot>
<slot name="SeverityStrings" type="string"></slot>
<slot name="UMLS_CUI" type="string">C0563276</slot>
<slot name="DaysBeforeDeath" type="int">0</slot>
<slot name="PAIN" type="string">Y</slot>
<slot name="MaxPain" type="int">1</slot>
<slot name="SeverityScale" type="int">1</slot>
<slot name="_score_SeverityScale" type="string"></slot>
<slot name="polarity" type="string">POSITIVE</slot>
```

```
<slot name="DocType" type="string"></slot>
<slot name="PatientID" type="int">0</slot>
<slot name="DateObject" type="record"/>
<slot name="enddate" type="date">
<date day="16" month="6" year="2000"/>
</slot>
<slot name="_score_enddate" type="string"></slot>
<slot name="startdate" type="date">
<date day="16" month="6" year="2000"/>
</slot>
<slot name="_score_startdate" type="string"></slot>
<slot name="Patient" type="string">PATIENT</slot>
<slot name="_score_Patient" type="string"></slot>
<slot name="_keyref" type="record"/>
<slot name="_score" type="string"></slot>
<slot name="_type" type="string"></slot>
</record>
<record id="26" template="HealthStatusRecord">
<slot name="ScoreType" type="string">HealthStatusRecord</slot>
<slot name="_score_ScoreType" type="string"></slot>
<slot name="source" type="string">C:\i2b2 eval\Subsets\Test\628.txt</slot>
<slot name="_score_source" type="string"></slot>
<slot name="region" type="region">
<region end="3206" start="3196">chest pain</region>
</slot>
```

<slot name="\_score\_region" type="string"></slot>  
<slot name="rule" type="string">HealthStatusItemPkg/0</slot>  
<slot name="ConceptName" type="string">CHEST PAIN UNSPECIFIED</slot>  
<slot name="\_score\_ConceptName" type="string"></slot>  
<slot name="SemanticType" type="string">Sign or Symptom</slot>  
<slot name="BodyLocations" type="string">CHEST</slot>  
<slot name="\_score\_BodyLocations" type="string"></slot>  
<slot name="SeverityStrings" type="string">DENIES</slot>  
<slot name="UMLS\_CUI" type="string">C1535568</slot>  
<slot name="DaysBeforeDeath" type="int">0</slot>  
<slot name="PAIN" type="string">Y</slot>  
<slot name="MaxPain" type="int">1</slot>  
<slot name="SeverityScale" type="int">0</slot>  
<slot name="\_score\_SeverityScale" type="string"></slot>  
<slot name="polarity" type="string">POSITIVE</slot>  
<slot name="DocType" type="string"></slot>  
<slot name="PatientID" type="int">0</slot>  
<slot name="DateObject" type="record"/>  
<slot name="enddate" type="date">  
<date day="4" month="7" year="2000"/>  
</slot>  
<slot name="\_score\_enddate" type="string"></slot>  
<slot name="startdate" type="date">  
<date day="4" month="7" year="2000"/>  
</slot>

```
<slot name="_score_startdate" type="string"></slot>
<slot name="Patient" type="string">PATIENT</slot>
<slot name="_score_Patient" type="string"></slot>
<slot name="_keyref" type="record"/>
<slot name="_score" type="string"></slot>
<slot name="_type" type="string"></slot>
</record>
<record id="27" template="HealthStatusRecord">
<slot name="ScoreType" type="string">HealthStatusRecord</slot>
<slot name="_score_ScoreType" type="string">CORRECT</slot>
<slot name="source" type="string">C:\i2b2 eval\Subsets\Test\628.txt</slot>
<slot name="_score_source" type="string">CORRECT</slot>
<slot name="region" type="region">
<region end="3206" start="3196">chest pain</region>
</slot>
<slot name="_score_region" type="string">CORRECT</slot>
<slot name="rule" type="string">HealthStatusItemPkg/0</slot>
<slot name="ConceptName" type="string">CHEST PAIN</slot>
<slot name="_score_ConceptName" type="string">INCORRECT</slot>
<slot name="SemanticType" type="string">Sign or Symptom</slot>
<slot name="BodyLocations" type="string">CHEST</slot>
<slot name="_score_BodyLocations" type="string">CORRECT</slot>
<slot name="SeverityStrings" type="string">DENIES</slot>
<slot name="UMLS_CUI" type="string">C0008031</slot>
<slot name="DaysBeforeDeath" type="int">0</slot>
```

```
<slot name="PAIN" type="string">Y</slot>
<slot name="MaxPain" type="int">1</slot>
<slot name="SeverityScale" type="int">0</slot>
<slot name="_score_SeverityScale" type="string">CORRECT</slot>
<slot name="polarity" type="string">POSITIVE</slot>
<slot name="DocType" type="string"></slot>
<slot name="PatientID" type="int">0</slot>
<slot name="DateObject" type="record"/>
<slot name="enddate" type="date">
<date day="4" month="7" year="2000"/>
</slot>
<slot name="_score_enddate" type="string">CORRECT</slot>
<slot name="startdate" type="date">
<date day="4" month="7" year="2000"/>
</slot>
<slot name="_score_startdate" type="string">CORRECT</slot>
<slot name="Patient" type="string">PATIENT</slot>
<slot name="_score_Patient" type="string">CORRECT</slot>
<slot name="_keyref" type="record">
<record ref="26"/>
</slot>
<slot name="_score" type="string">INCORRECT</slot>
<slot name="_type" type="string"></slot>
</record>
<record id="28" template="HealthStatusRecord">
```

<slot name="ScoreType" type="string">HealthStatusRecord</slot>  
<slot name="\_score\_ScoreType" type="string"></slot>  
<slot name="source" type="string">C:\i2b2 eval\Subsets\Test\628.txt</slot>  
<slot name="\_score\_source" type="string"></slot>  
<slot name="region" type="region">  
<region end="3206" start="3196">chest pain</region>  
</slot>  
<slot name="\_score\_region" type="string"></slot>  
<slot name="rule" type="string">HealthStatusItemPkg/0</slot>  
<slot name="ConceptName" type="string">CHEST PAIN UNSPECIFIED</slot>  
<slot name="\_score\_ConceptName" type="string"></slot>  
<slot name="SemanticType" type="string">Sign or Symptom</slot>  
<slot name="BodyLocations" type="string">CHEST</slot>  
<slot name="\_score\_BodyLocations" type="string"></slot>  
<slot name="SeverityStrings" type="string">DENIES</slot>  
<slot name="UMLS\_CUI" type="string">C1535568</slot>  
<slot name="DaysBeforeDeath" type="int">0</slot>  
<slot name="PAIN" type="string">Y</slot>  
<slot name="MaxPain" type="int">1</slot>  
<slot name="SeverityScale" type="int">0</slot>  
<slot name="\_score\_SeverityScale" type="string"></slot>  
<slot name="polarity" type="string">POSITIVE</slot>  
<slot name="DocType" type="string"></slot>  
<slot name="PatientID" type="int">0</slot>  
<slot name="DateObject" type="record"/>

```
<slot name="enddate" type="date">
<date day="4" month="7" year="2000"/>
</slot>
<slot name="_score_enddate" type="string"></slot>
<slot name="startdate" type="date">
<date day="4" month="7" year="2000"/>
</slot>
<slot name="_score_startdate" type="string"></slot>
<slot name="Patient" type="string">PATIENT</slot>
<slot name="_score_Patient" type="string"></slot>
<slot name="_keyref" type="record"/>
<slot name="_score" type="string"></slot>
<slot name="_type" type="string"></slot>
</record>
<record id="29" template="HealthStatusRecord">
<slot name="ScoreType" type="string">HealthStatusRecord</slot>
<slot name="_score_ScoreType" type="string"></slot>
<slot name="source" type="string">C:\i2b2 eval\Subsets\Test\628.txt</slot>
<slot name="_score_source" type="string"></slot>
<slot name="region" type="region">
<region end="3193" start="3184">headaches</region>
</slot>
<slot name="_score_region" type="string"></slot>
<slot name="rule" type="string">HealthStatusItemPkg/0</slot>
<slot name="ConceptName" type="string">FRONTAL HEADACHE</slot>
```

<slot name="\_score\_ConceptName" type="string"></slot>  
<slot name="SemanticType" type="string">Sign or Symptom</slot>  
<slot name="BodyLocations" type="string">HEAD</slot>  
<slot name="\_score\_BodyLocations" type="string"></slot>  
<slot name="SeverityStrings" type="string">DENIES</slot>  
<slot name="UMLS\_CUI" type="string">C2004251</slot>  
<slot name="DaysBeforeDeath" type="int">0</slot>  
<slot name="PAIN" type="string">Y</slot>  
<slot name="MaxPain" type="int">1</slot>  
<slot name="SeverityScale" type="int">0</slot>  
<slot name="\_score\_SeverityScale" type="string"></slot>  
<slot name="polarity" type="string">POSITIVE</slot>  
<slot name="DocType" type="string"></slot>  
<slot name="PatientID" type="int">0</slot>  
<slot name="DateObject" type="record"/>  
<slot name="enddate" type="date">  
<date day="4" month="7" year="2000"/>  
</slot>  
<slot name="\_score\_enddate" type="string"></slot>  
<slot name="startdate" type="date">  
<date day="4" month="7" year="2000"/>  
</slot>  
<slot name="\_score\_startdate" type="string"></slot>  
<slot name="Patient" type="string">PATIENT</slot>  
<slot name="\_score\_Patient" type="string"></slot>



```
<slot name="_keyref" type="record"/>
<slot name="_score" type="string"></slot>
<slot name="_type" type="string"></slot>
</record>
<record id="30" template="HealthStatusRecord">
<slot name="ScoreType" type="string">HealthStatusRecord</slot>
<slot name="_score_ScoreType" type="string">CORRECT</slot>
<slot name="source" type="string">C:\i2b2 eval\Subsets\Test\628.txt</slot>
<slot name="_score_source" type="string">CORRECT</slot>
<slot name="region" type="region">
<region end="3193" start="3184">headaches</region>
</slot>
<slot name="_score_region" type="string">CORRECT</slot>
<slot name="rule" type="string">HealthStatusItemPkg/0</slot>
<slot name="ConceptName" type="string">PAIN IN HEAD</slot>
<slot name="_score_ConceptName" type="string">INCORRECT</slot>
<slot name="SemanticType" type="string">Sign or Symptom</slot>
<slot name="BodyLocations" type="string">HEAD</slot>
<slot name="_score_BodyLocations" type="string">CORRECT</slot>
<slot name="SeverityStrings" type="string">DENIES</slot>
<slot name="UMLS_CUI" type="string">C0018681</slot>
<slot name="DaysBeforeDeath" type="int">0</slot>
<slot name="PAIN" type="string">Y</slot>
<slot name="MaxPain" type="int">1</slot>
<slot name="SeverityScale" type="int">0</slot>
```

```
<slot name="_score_SeverityScale" type="string">CORRECT</slot>
<slot name="polarity" type="string">POSITIVE</slot>
<slot name="DocType" type="string"></slot>
<slot name="PatientID" type="int">0</slot>
<slot name="DateObject" type="record"/>
<slot name="enddate" type="date">
<date day="4" month="7" year="2000"/>
</slot>
<slot name="_score_enddate" type="string">CORRECT</slot>
<slot name="startdate" type="date">
<date day="4" month="7" year="2000"/>
</slot>
<slot name="_score_startdate" type="string">CORRECT</slot>
<slot name="Patient" type="string">PATIENT</slot>
<slot name="_score_Patient" type="string">CORRECT</slot>
<slot name="_keyref" type="record">
<record ref="29"/>
</slot>
<slot name="_score" type="string">INCORRECT</slot>
<slot name="_type" type="string"></slot>
</record>
<record id="31" template="HealthStatusRecord">
<slot name="ScoreType" type="string">HealthStatusRecord</slot>
<slot name="_score_ScoreType" type="string"></slot>
<slot name="source" type="string">C:\i2b2 eval\Subsets\Test\628.txt</slot>
```

<slot name="\_score\_source" type="string"></slot>  
<slot name="region" type="region">  
<region end="3415" start="3405">tenderness</region>  
</slot>  
<slot name="\_score\_region" type="string"></slot>  
<slot name="rule" type="string">HealthStatusItemPkg/0</slot>  
<slot name="ConceptName" type="string">TENDERNESS</slot>  
<slot name="\_score\_ConceptName" type="string"></slot>  
<slot name="SemanticType" type="string">Sign or Symptom</slot>  
<slot name="BodyLocations" type="string">JOINT</slot>  
<slot name="\_score\_BodyLocations" type="string"></slot>  
<slot name="SeverityStrings" type="string"></slot>  
<slot name="UMLS\_CUI" type="string">C0234233</slot>  
<slot name="DaysBeforeDeath" type="int">0</slot>  
<slot name="PAIN" type="string">Y</slot>  
<slot name="MaxPain" type="int">1</slot>  
<slot name="SeverityScale" type="int">0</slot>  
<slot name="\_score\_SeverityScale" type="string"></slot>  
<slot name="polarity" type="string">POSITIVE</slot>  
<slot name="DocType" type="string"></slot>  
<slot name="PatientID" type="int">0</slot>  
<slot name="DateObject" type="record"/>  
<slot name="enddate" type="date">  
<date day="4" month="7" year="2000"/>  
</slot>

```
<slot name="_score_enddate" type="string"></slot>
<slot name="startdate" type="date">
<date day="4" month="7" year="2000"/>
</slot>
<slot name="_score_startdate" type="string"></slot>
<slot name="Patient" type="string">PATIENT</slot>
<slot name="_score_Patient" type="string"></slot>
<slot name="_keyref" type="record"/>
<slot name="_score" type="string"></slot>
<slot name="_type" type="string"></slot>
</record>
</records>
</infStore>
<?xml version="1.0" encoding="UTF-8"?>
<infStore>
<records>
<record id="0" template="HealthStatusRecord">
<slot name="ScoreType" type="string">HealthStatusRecord</slot>
<slot name="_score_ScoreType" type="string">CORRECT</slot>
<slot name="source" type="string">C:\i2b2 eval\Subsets\Test\862.txt</slot>
<slot name="_score_source" type="string">CORRECT</slot>
<slot name="region" type="region">
<region end="729" start="723">angina</region>
</slot>
<slot name="_score_region" type="string">CORRECT</slot>
```

<slot name="rule" type="string">HealthStatusItemPkg/0</slot>  
<slot name="ConceptName" type="string">ANGINA PECTORIS</slot>  
<slot name="\_score\_ConceptName" type="string">CORRECT</slot>  
<slot name="SemanticType" type="string">Sign or Symptom</slot>  
<slot name="BodyLocations" type="string">CHEST</slot>  
<slot name="\_score\_BodyLocations" type="string">CORRECT</slot>  
<slot name="SeverityStrings" type="string"></slot>  
<slot name="UMLS\_CUI" type="string">C0002962</slot>  
<slot name="DaysBeforeDeath" type="int">0</slot>  
<slot name="PAIN" type="string">Y</slot>  
<slot name="MaxPain" type="int">1</slot>  
<slot name="SeverityScale" type="int">1</slot>  
<slot name="\_score\_SeverityScale" type="string">CORRECT</slot>  
<slot name="polarity" type="string">POSITIVE</slot>  
<slot name="DocType" type="string"></slot>  
<slot name="PatientID" type="int">0</slot>  
<slot name="DateObject" type="record"/>  
<slot name="enddate" type="date">  
<date day="25" month="3" year="1997"/>  
</slot>  
<slot name="\_score\_enddate" type="string">CORRECT</slot>  
<slot name="startdate" type="date">  
<date day="25" month="3" year="1997"/>  
</slot>  
<slot name="\_score\_startdate" type="string">CORRECT</slot>

```
<slot name="Patient" type="string">PATIENT</slot>
<slot name="_score_Patient" type="string">CORRECT</slot>
<slot name="_keyref" type="record"/>
<slot name="_score" type="string">CORRECT</slot>
<slot name="_type" type="string"></slot>
</record>
<record id="1" template="HealthStatusRecord">
<slot name="ScoreType" type="string">HealthStatusRecord</slot>
<slot name="_score_ScoreType" type="string"></slot>
<slot name="source" type="string">C:\i2b2 eval\Subsets\Test\862.txt</slot>
<slot name="_score_source" type="string"></slot>
<slot name="region" type="region">
<region end="1380" start="1370">discomfort</region>
</slot>
<slot name="_score_region" type="string"></slot>
<slot name="rule" type="string">HealthStatusItemPkg/0</slot>
<slot name="ConceptName" type="string">CHEST PAIN UNSPECIFIED</slot>
<slot name="_score_ConceptName" type="string"></slot>
<slot name="SemanticType" type="string">Sign or Symptom</slot>
<slot name="BodyLocations" type="string">CHEST</slot>
<slot name="_score_BodyLocations" type="string"></slot>
<slot name="SeverityStrings" type="string"></slot>
<slot name="UMLS_CUI" type="string">C1535568</slot>
<slot name="DaysBeforeDeath" type="int">0</slot>
<slot name="PAIN" type="string">Y</slot>
```

```
<slot name="MaxPain" type="int">1</slot>
<slot name="SeverityScale" type="int">1</slot>
<slot name="_score_SeverityScale" type="string"></slot>
<slot name="polarity" type="string">POSITIVE</slot>
<slot name="DocType" type="string"></slot>
<slot name="PatientID" type="int">0</slot>
<slot name="DateObject" type="record"/>
<slot name="enddate" type="date">
<date day="25" month="3" year="1997"/>
</slot>
<slot name="_score_enddate" type="string"></slot>
<slot name="startdate" type="date">
<date day="25" month="3" year="1997"/>
</slot>
<slot name="_score_startdate" type="string"></slot>
<slot name="Patient" type="string">PATIENT</slot>
<slot name="_score_Patient" type="string"></slot>
<slot name="_keyref" type="record"/>
<slot name="_score" type="string"></slot>
<slot name="_type" type="string"></slot>
</record>
<record id="2" template="HealthStatusRecord">
<slot name="ScoreType" type="string">HealthStatusRecord</slot>
<slot name="_score_ScoreType" type="string"></slot>
<slot name="source" type="string">C:\i2b2 eval\Subsets\Test\862.txt</slot>
```

<slot name="\_score\_source" type="string"></slot>  
<slot name="region" type="region">  
<region end="1380" start="1370">discomfort</region>  
</slot>  
<slot name="\_score\_region" type="string"></slot>  
<slot name="rule" type="string">HealthStatusItemPkg/0</slot>  
<slot name="ConceptName" type="string">CHEST PAIN UNSPECIFIED</slot>  
<slot name="\_score\_ConceptName" type="string"></slot>  
<slot name="SemanticType" type="string">Sign or Symptom</slot>  
<slot name="BodyLocations" type="string">CHEST</slot>  
<slot name="\_score\_BodyLocations" type="string"></slot>  
<slot name="SeverityStrings" type="string"></slot>  
<slot name="UMLS\_CUI" type="string">C1535568</slot>  
<slot name="DaysBeforeDeath" type="int">0</slot>  
<slot name="PAIN" type="string">Y</slot>  
<slot name="MaxPain" type="int">1</slot>  
<slot name="SeverityScale" type="int">1</slot>  
<slot name="\_score\_SeverityScale" type="string"></slot>  
<slot name="polarity" type="string">POSITIVE</slot>  
<slot name="DocType" type="string"></slot>  
<slot name="PatientID" type="int">0</slot>  
<slot name="DateObject" type="record"/>  
<slot name="enddate" type="date">  
<date day="25" month="3" year="1997"/>  
</slot>



```
<slot name="_score_enddate" type="string"></slot>
<slot name="startdate" type="date">
<date day="25" month="3" year="1997"/>
</slot>
<slot name="_score_startdate" type="string"></slot>
<slot name="Patient" type="string">PATIENT</slot>
<slot name="_score_Patient" type="string"></slot>
<slot name="_keyref" type="record"/>
<slot name="_score" type="string"></slot>
<slot name="_type" type="string"></slot>
</record>
<record id="3" template="HealthStatusRecord">
<slot name="ScoreType" type="string">HealthStatusRecord</slot>
<slot name="_score_ScoreType" type="string">CORRECT</slot>
<slot name="source" type="string">C:\i2b2 eval\Subsets\Test\862.txt</slot>
<slot name="_score_source" type="string">CORRECT</slot>
<slot name="region" type="region">
<region end="1380" start="1370">discomfort</region>
</slot>
<slot name="_score_region" type="string">CORRECT</slot>
<slot name="rule" type="string">HealthStatusItemPkg/0</slot>
<slot name="ConceptName" type="string">DISCOMFORT</slot>
<slot name="_score_ConceptName" type="string">INCORRECT</slot>
<slot name="SemanticType" type="string">Sign or Symptom</slot>
<slot name="BodyLocations" type="string">CHEST</slot>
```

<slot name="\_score\_BodyLocations" type="string">CORRECT</slot>  
<slot name="SeverityStrings" type="string"></slot>  
<slot name="UMLS\_CUI" type="string">C2737161</slot>  
<slot name="DaysBeforeDeath" type="int">0</slot>  
<slot name="PAIN" type="string">Y</slot>  
<slot name="MaxPain" type="int">1</slot>  
<slot name="SeverityScale" type="int">1</slot>  
<slot name="\_score\_SeverityScale" type="string">CORRECT</slot>  
<slot name="polarity" type="string">POSITIVE</slot>  
<slot name="DocType" type="string"></slot>  
<slot name="PatientID" type="int">0</slot>  
<slot name="DateObject" type="record"/>  
<slot name="enddate" type="date">  
<date day="29" month="3" year="1997"/>  
</slot>  
<slot name="\_score\_enddate" type="string">INCORRECT</slot>  
<slot name="startdate" type="date">  
<date day="29" month="3" year="1997"/>  
</slot>  
<slot name="\_score\_startdate" type="string">INCORRECT</slot>  
<slot name="Patient" type="string">PATIENT</slot>  
<slot name="\_score\_Patient" type="string">CORRECT</slot>  
<slot name="\_keyref" type="record">  
<record ref="2"/>  
</slot>

```
<slot name="_score" type="string">INCORRECT</slot>
<slot name="_type" type="string"></slot>
</record>
</records>
</infStore>
<?xml version="1.0" encoding="UTF-8"?>
<infStore>
<records>
<record id="0" template="HealthStatusRecord">
<slot name="ScoreType" type="string">HealthStatusRecord</slot>
<slot name="_score_ScoreType" type="string"></slot>
<slot name="source" type="string">C:\i2b2 eval\Subsets\Test\865.txt</slot>
<slot name="_score_source" type="string"></slot>
<slot name="region" type="region">
<region end="7194" start="7190">pain</region>
</slot>
<slot name="_score_region" type="string"></slot>
<slot name="rule" type="string">HealthStatusItemPkg/0</slot>
<slot name="ConceptName" type="string">PAIN IN LEFT ARM</slot>
<slot name="_score_ConceptName" type="string"></slot>
<slot name="SemanticType" type="string">Sign or Symptom</slot>
<slot name="BodyLocations" type="string">UPPER ARM LEFT</slot>
<slot name="_score_BodyLocations" type="string"></slot>
<slot name="SeverityStrings" type="string"></slot>
<slot name="UMLS_CUI" type="string">C0564820</slot>
```

```
<slot name="DaysBeforeDeath" type="int">0</slot>
<slot name="PAIN" type="string">Y</slot>
<slot name="MaxPain" type="int">3</slot>
<slot name="SeverityScale" type="int">1</slot>
<slot name="_score_SeverityScale" type="string"></slot>
<slot name="polarity" type="string">POSITIVE</slot>
<slot name="DocType" type="string"></slot>
<slot name="PatientID" type="int">0</slot>
<slot name="DateObject" type="record"/>
<slot name="enddate" type="date">
<date day="5" month="1" year="1994"/>
</slot>
<slot name="_score_enddate" type="string"></slot>
<slot name="startdate" type="date">
<date day="5" month="1" year="1994"/>
</slot>
<slot name="_score_startdate" type="string"></slot>
<slot name="Patient" type="string">PATIENT</slot>
<slot name="_score_Patient" type="string"></slot>
<slot name="_keyref" type="record"/>
<slot name="_score" type="string"></slot>
<slot name="_type" type="string"></slot>
</record>
<record id="1" template="HealthStatusRecord">
<slot name="ScoreType" type="string">HealthStatusRecord</slot>
```

<slot name="\_score\_ScoreType" type="string">CORRECT</slot>  
<slot name="source" type="string">C:\i2b2 eval\Subsets\Test\865.txt</slot>  
<slot name="\_score\_source" type="string">CORRECT</slot>  
<slot name="region" type="region">  
<region end="7194" start="7190">pain</region>  
</slot>  
<slot name="\_score\_region" type="string">CORRECT</slot>  
<slot name="rule" type="string">HealthStatusItemPkg/0</slot>  
<slot name="ConceptName" type="string">PAIN</slot>  
<slot name="\_score\_ConceptName" type="string">INCORRECT</slot>  
<slot name="SemanticType" type="string">Sign or Symptom</slot>  
<slot name="BodyLocations" type="string">UPPER ARM LEFT</slot>  
<slot name="\_score\_BodyLocations" type="string">CORRECT</slot>  
<slot name="SeverityStrings" type="string"></slot>  
<slot name="UMLS\_CUI" type="string">C0030193</slot>  
<slot name="DaysBeforeDeath" type="int">0</slot>  
<slot name="PAIN" type="string">Y</slot>  
<slot name="MaxPain" type="int">3</slot>  
<slot name="SeverityScale" type="int">1</slot>  
<slot name="\_score\_SeverityScale" type="string">CORRECT</slot>  
<slot name="polarity" type="string">POSITIVE</slot>  
<slot name="DocType" type="string"></slot>  
<slot name="PatientID" type="int">0</slot>  
<slot name="DateObject" type="record"/>  
<slot name="enddate" type="date">

```
<date day="5" month="1" year="1994"/>
</slot>
<slot name="_score_enddate" type="string">CORRECT</slot>
<slot name="startdate" type="date">
<date day="5" month="1" year="1994"/>
</slot>
<slot name="_score_startdate" type="string">CORRECT</slot>
<slot name="Patient" type="string">PATIENT</slot>
<slot name="_score_Patient" type="string">CORRECT</slot>
<slot name="_keyref" type="record">
<record ref="0"/>
</slot>
<slot name="_score" type="string">INCORRECT</slot>
<slot name="_type" type="string"></slot>
</record>
<record id="2" template="HealthStatusRecord">
<slot name="ScoreType" type="string">HealthStatusRecord</slot>
<slot name="_score_ScoreType" type="string">MISSING</slot>
<slot name="source" type="string">C:\i2b2 eval\Subsets\Test\865.txt</slot>
<slot name="_score_source" type="string">MISSING</slot>
<slot name="region" type="region">
<region end="7147" start="7143">pain</region>
</slot>
<slot name="_score_region" type="string">MISSING</slot>
<slot name="rule" type="string"></slot>
```

<slot name="ConceptName" type="string">PAIN</slot>  
<slot name="\_score\_ConceptName" type="string">MISSING</slot>  
<slot name="SemanticType" type="string"></slot>  
<slot name="BodyLocations" type="string">LEFT ARM</slot>  
<slot name="\_score\_BodyLocations" type="string">MISSING</slot>  
<slot name="SeverityStrings" type="string"></slot>  
<slot name="UMLS\_CUI" type="string"></slot>  
<slot name="DaysBeforeDeath" type="int">0</slot>  
<slot name="PAIN" type="string">Y</slot>  
<slot name="MaxPain" type="int">0</slot>  
<slot name="SeverityScale" type="int">3</slot>  
<slot name="\_score\_SeverityScale" type="string">MISSING</slot>  
<slot name="polarity" type="string"></slot>  
<slot name="DocType" type="string"></slot>  
<slot name="PatientID" type="int">0</slot>  
<slot name="DateObject" type="record"/>  
<slot name="enddate" type="date">  
<date day="5" month="1" year="1994"/>  
</slot>  
<slot name="\_score\_enddate" type="string">MISSING</slot>  
<slot name="startdate" type="date">  
<date day="5" month="1" year="1994"/>  
</slot>  
<slot name="\_score\_startdate" type="string">MISSING</slot>  
<slot name="Patient" type="string"></slot>

```
<slot name="_score_Patient" type="string"></slot>
<slot name="_keyref" type="record"/>
<slot name="_score" type="string">MISSING</slot>
<slot name="_type" type="string"></slot>
</record>
<record id="3" template="HealthStatusRecord">
<slot name="ScoreType" type="string">HealthStatusRecord</slot>
<slot name="_score_ScoreType" type="string"></slot>
<slot name="source" type="string">C:\i2b2 eval\Subsets\Test\865.txt</slot>
<slot name="_score_source" type="string"></slot>
<slot name="region" type="region">
<region end="11879" start="11875">pain</region>
</slot>
<slot name="_score_region" type="string"></slot>
<slot name="rule" type="string">HealthStatusItemPkg/0</slot>
<slot name="ConceptName" type="string">PAIN</slot>
<slot name="_score_ConceptName" type="string"></slot>
<slot name="SemanticType" type="string">Sign or Symptom</slot>
<slot name="BodyLocations" type="string">LEFT ARM</slot>
<slot name="_score_BodyLocations" type="string"></slot>
<slot name="SeverityStrings" type="string"></slot>
<slot name="UMLS_CUI" type="string">C0030193</slot>
<slot name="DaysBeforeDeath" type="int">0</slot>
<slot name="PAIN" type="string">Y</slot>
<slot name="MaxPain" type="int">3</slot>
```



```
<slot name="SeverityScale" type="int">1</slot>
<slot name="_score_SeverityScale" type="string"></slot>
<slot name="polarity" type="string">POSITIVE</slot>
<slot name="DocType" type="string"></slot>
<slot name="PatientID" type="int">0</slot>
<slot name="DateObject" type="record"/>
<slot name="enddate" type="date">
<date day="5" month="1" year="1994"/>
</slot>
<slot name="_score_enddate" type="string"></slot>
<slot name="startdate" type="date">
<date day="5" month="1" year="1994"/>
</slot>
<slot name="_score_startdate" type="string"></slot>
<slot name="Patient" type="string">PATIENT</slot>
<slot name="_score_Patient" type="string"></slot>
<slot name="_keyref" type="record"/>
<slot name="_score" type="string"></slot>
<slot name="_type" type="string"></slot>
</record>
<record id="4" template="HealthStatusRecord">
<slot name="ScoreType" type="string">HealthStatusRecord</slot>
<slot name="_score_ScoreType" type="string"></slot>
<slot name="source" type="string">C:\i2b2 eval\Subsets\Test\865.txt</slot>
<slot name="_score_source" type="string"></slot>
```

<slot name="region" type="region">  
<region end="7523" start="7519">pain</region>  
</slot>  
<slot name="\_score\_region" type="string"></slot>  
<slot name="rule" type="string">HealthStatusItemPkg/0</slot>  
<slot name="ConceptName" type="string">PAIN</slot>  
<slot name="\_score\_ConceptName" type="string"></slot>  
<slot name="SemanticType" type="string">Sign or Symptom</slot>  
<slot name="BodyLocations" type="string">LEFT ARM</slot>  
<slot name="\_score\_BodyLocations" type="string"></slot>  
<slot name="SeverityStrings" type="string">RELIEF OF</slot>  
<slot name="UMLS\_CUI" type="string">C0030193</slot>  
<slot name="DaysBeforeDeath" type="int">0</slot>  
<slot name="PAIN" type="string">Y</slot>  
<slot name="MaxPain" type="int">3</slot>  
<slot name="SeverityScale" type="int">3</slot>  
<slot name="\_score\_SeverityScale" type="string"></slot>  
<slot name="polarity" type="string">POSITIVE</slot>  
<slot name="DocType" type="string"></slot>  
<slot name="PatientID" type="int">0</slot>  
<slot name="DateObject" type="record"/>  
<slot name="enddate" type="date">  
<date day="25" month="1" year="1994"/>  
</slot>  
<slot name="\_score\_enddate" type="string"></slot>

```
<slot name="startdate" type="date">
<date day="6" month="1" year="1994"/>
</slot>
<slot name="_score_startdate" type="string"></slot>
<slot name="Patient" type="string">PATIENT</slot>
<slot name="_score_Patient" type="string"></slot>
<slot name="_keyref" type="record"/>
<slot name="_score" type="string"></slot>
<slot name="_type" type="string"></slot>
</record>
<record id="5" template="HealthStatusRecord">
<slot name="ScoreType" type="string">HealthStatusRecord</slot>
<slot name="_score_ScoreType" type="string"></slot>
<slot name="source" type="string">C:\i2b2 eval\Subsets\Test\865.txt</slot>
<slot name="_score_source" type="string"></slot>
<slot name="region" type="region">
<region end="8063" start="8059">pain</region>
</slot>
<slot name="_score_region" type="string"></slot>
<slot name="rule" type="string">HealthStatusItemPkg/0</slot>
<slot name="ConceptName" type="string">PAIN</slot>
<slot name="_score_ConceptName" type="string"></slot>
<slot name="SemanticType" type="string">Sign or Symptom</slot>
<slot name="BodyLocations" type="string">LEFT ARM</slot>
<slot name="_score_BodyLocations" type="string"></slot>
```

```
<slot name="SeverityStrings" type="string">CONSIDERABLE</slot>
<slot name="UMLS_CUI" type="string">C0030193</slot>
<slot name="DaysBeforeDeath" type="int">0</slot>
<slot name="PAIN" type="string">Y</slot>
<slot name="MaxPain" type="int">3</slot>
<slot name="SeverityScale" type="int">3</slot>
<slot name="_score_SeverityScale" type="string"></slot>
<slot name="polarity" type="string">POSITIVE</slot>
<slot name="DocType" type="string"></slot>
<slot name="PatientID" type="int">0</slot>
<slot name="DateObject" type="record"/>
<slot name="enddate" type="date">
<date day="5" month="1" year="1994"/>
</slot>
<slot name="_score_enddate" type="string"></slot>
<slot name="startdate" type="date">
<date day="5" month="1" year="1994"/>
</slot>
<slot name="_score_startdate" type="string"></slot>
<slot name="Patient" type="string">PATIENT</slot>
<slot name="_score_Patient" type="string"></slot>
<slot name="_keyref" type="record"/>
<slot name="_score" type="string"></slot>
<slot name="_type" type="string"></slot>
</record>
```

```
<record id="6" template="HealthStatusRecord">
  <slot name="ScoreType" type="string">HealthStatusRecord</slot>
  <slot name="_score_ScoreType" type="string"></slot>
  <slot name="source" type="string">C:\i2b2 eval\Subsets\Test\865.txt</slot>
  <slot name="_score_source" type="string"></slot>
  <slot name="region" type="region">
    <region end="7194" start="7190">pain</region>
  </slot>
  <slot name="_score_region" type="string"></slot>
  <slot name="rule" type="string">HealthStatusItemPkg/0</slot>
  <slot name="ConceptName" type="string">PAIN IN LEFT ARM</slot>
  <slot name="_score_ConceptName" type="string"></slot>
  <slot name="SemanticType" type="string">Sign or Symptom</slot>
  <slot name="BodyLocations" type="string">UPPER ARM LEFT</slot>
  <slot name="_score_BodyLocations" type="string"></slot>
  <slot name="SeverityStrings" type="string"></slot>
  <slot name="UMLS_CUI" type="string">C0564820</slot>
  <slot name="DaysBeforeDeath" type="int">0</slot>
  <slot name="PAIN" type="string">Y</slot>
  <slot name="MaxPain" type="int">3</slot>
  <slot name="SeverityScale" type="int">1</slot>
  <slot name="_score_SeverityScale" type="string"></slot>
  <slot name="polarity" type="string">POSITIVE</slot>
  <slot name="DocType" type="string"></slot>
  <slot name="PatientID" type="int">0</slot>
```

```
<slot name="DateObject" type="record"/>
<slot name="enddate" type="date">
<date day="5" month="1" year="1994"/>
</slot>
<slot name="_score_enddate" type="string"></slot>
<slot name="startdate" type="date">
<date day="5" month="1" year="1994"/>
</slot>
<slot name="_score_startdate" type="string"></slot>
<slot name="Patient" type="string">PATIENT</slot>
<slot name="_score_Patient" type="string"></slot>
<slot name="_keyref" type="record"/>
<slot name="_score" type="string"></slot>
<slot name="_type" type="string"></slot>
</record>
<record id="7" template="HealthStatusRecord">
<slot name="ScoreType" type="string">HealthStatusRecord</slot>
<slot name="_score_ScoreType" type="string"></slot>
<slot name="source" type="string">C:\i2b2 eval\Subsets\Test\865.txt</slot>
<slot name="_score_source" type="string"></slot>
<slot name="region" type="region">
<region end="7971" start="7967">pain</region>
</slot>
<slot name="_score_region" type="string"></slot>
<slot name="rule" type="string">HealthStatusItemPkg/0</slot>
```

<slot name="ConceptName" type="string">PAIN</slot>  
<slot name="\_score\_ConceptName" type="string"></slot>  
<slot name="SemanticType" type="string">Sign or Symptom</slot>  
<slot name="BodyLocations" type="string">LEFT ARM</slot>  
<slot name="\_score\_BodyLocations" type="string"></slot>  
<slot name="SeverityStrings" type="string"></slot>  
<slot name="UMLS\_CUI" type="string">C0030193</slot>  
<slot name="DaysBeforeDeath" type="int">0</slot>  
<slot name="PAIN" type="string">Y</slot>  
<slot name="MaxPain" type="int">3</slot>  
<slot name="SeverityScale" type="int">3</slot>  
<slot name="\_score\_SeverityScale" type="string"></slot>  
<slot name="polarity" type="string">POSITIVE</slot>  
<slot name="DocType" type="string"></slot>  
<slot name="PatientID" type="int">0</slot>  
<slot name="DateObject" type="record"/>  
<slot name="enddate" type="date">  
<date day="5" month="1" year="1994"/>  
</slot>  
<slot name="\_score\_enddate" type="string"></slot>  
<slot name="startdate" type="date">  
<date day="5" month="1" year="1994"/>  
</slot>  
<slot name="\_score\_startdate" type="string"></slot>  
<slot name="Patient" type="string">PATIENT</slot>

```
<slot name="_score_Patient" type="string"></slot>
<slot name="_keyref" type="record"/>
<slot name="_score" type="string"></slot>
<slot name="_type" type="string"></slot>
</record>
<record id="8" template="HealthStatusRecord">
<slot name="ScoreType" type="string">HealthStatusRecord</slot>
<slot name="_score_ScoreType" type="string"></slot>
<slot name="source" type="string">C:\i2b2 eval\Subsets\Test\865.txt</slot>
<slot name="_score_source" type="string"></slot>
<slot name="region" type="region">
<region end="7523" start="7519">pain</region>
</slot>
<slot name="_score_region" type="string"></slot>
<slot name="rule" type="string">HealthStatusItemPkg/0</slot>
<slot name="ConceptName" type="string">PAIN</slot>
<slot name="_score_ConceptName" type="string"></slot>
<slot name="SemanticType" type="string">Sign or Symptom</slot>
<slot name="BodyLocations" type="string">LEFT ARM</slot>
<slot name="_score_BodyLocations" type="string"></slot>
<slot name="SeverityStrings" type="string">RELIEF OF</slot>
<slot name="UMLS_CUI" type="string">C0030193</slot>
<slot name="DaysBeforeDeath" type="int">0</slot>
<slot name="PAIN" type="string">Y</slot>
<slot name="MaxPain" type="int">3</slot>
```



```
<slot name="SeverityScale" type="int">3</slot>
<slot name="_score_SeverityScale" type="string"></slot>
<slot name="polarity" type="string">POSITIVE</slot>
<slot name="DocType" type="string"></slot>
<slot name="PatientID" type="int">0</slot>
<slot name="DateObject" type="record"/>
<slot name="enddate" type="date">
<date day="25" month="1" year="1994"/>
</slot>
<slot name="_score_enddate" type="string"></slot>
<slot name="startdate" type="date">
<date day="6" month="1" year="1994"/>
</slot>
<slot name="_score_startdate" type="string"></slot>
<slot name="Patient" type="string">PATIENT</slot>
<slot name="_score_Patient" type="string"></slot>
<slot name="_keyref" type="record"/>
<slot name="_score" type="string"></slot>
<slot name="_type" type="string"></slot>
</record>
<record id="9" template="HealthStatusRecord">
<slot name="ScoreType" type="string">HealthStatusRecord</slot>
<slot name="_score_ScoreType" type="string">CORRECT</slot>
<slot name="source" type="string">C:\i2b2 eval\Subsets\Test\865.txt</slot>
<slot name="_score_source" type="string">CORRECT</slot>
```

<slot name="region" type="region">  
<region end="7523" start="7519">pain</region>  
</slot>  
<slot name="\_score\_region" type="string">CORRECT</slot>  
<slot name="rule" type="string">HealthStatusItemPkg/0</slot>  
<slot name="ConceptName" type="string">PAIN</slot>  
<slot name="\_score\_ConceptName" type="string">CORRECT</slot>  
<slot name="SemanticType" type="string">Sign or Symptom</slot>  
<slot name="BodyLocations" type="string"></slot>  
<slot name="\_score\_BodyLocations" type="string">MISSING</slot>  
<slot name="SeverityStrings" type="string">RELIEF OF</slot>  
<slot name="UMLS\_CUI" type="string">C0030193</slot>  
<slot name="DaysBeforeDeath" type="int">0</slot>  
<slot name="PAIN" type="string">Y</slot>  
<slot name="MaxPain" type="int">3</slot>  
<slot name="SeverityScale" type="int">0</slot>  
<slot name="\_score\_SeverityScale" type="string">INCORRECT</slot>  
<slot name="polarity" type="string">POSITIVE</slot>  
<slot name="DocType" type="string"></slot>  
<slot name="PatientID" type="int">0</slot>  
<slot name="DateObject" type="record"/>  
<slot name="enddate" type="date">  
<date day="5" month="1" year="1994"/>  
</slot>  
<slot name="\_score\_enddate" type="string">INCORRECT</slot>

```
<slot name="startdate" type="date">
<date day="5" month="1" year="1994"/>
</slot>
<slot name="_score_startdate" type="string">INCORRECT</slot>
<slot name="Patient" type="string">PATIENT</slot>
<slot name="_score_Patient" type="string">CORRECT</slot>
<slot name="_keyref" type="record">
<record ref="8"/>
</slot>
<slot name="_score" type="string">INCORRECT</slot>
<slot name="_type" type="string"></slot>
</record>
<record id="10" template="HealthStatusRecord">
<slot name="ScoreType" type="string">HealthStatusRecord</slot>
<slot name="_score_ScoreType" type="string"></slot>
<slot name="source" type="string">C:\i2b2 eval\Subsets\Test\865.txt</slot>
<slot name="_score_source" type="string"></slot>
<slot name="region" type="region">
<region end="11879" start="11875">pain</region>
</slot>
<slot name="_score_region" type="string"></slot>
<slot name="rule" type="string">HealthStatusItemPkg/0</slot>
<slot name="ConceptName" type="string">PAIN</slot>
<slot name="_score_ConceptName" type="string"></slot>
<slot name="SemanticType" type="string">Sign or Symptom</slot>
```

<slot name="BodyLocations" type="string">LEFT ARM</slot>  
<slot name="\_score\_BodyLocations" type="string"></slot>  
<slot name="SeverityStrings" type="string"></slot>  
<slot name="UMLS\_CUI" type="string">C0030193</slot>  
<slot name="DaysBeforeDeath" type="int">0</slot>  
<slot name="PAIN" type="string">Y</slot>  
<slot name="MaxPain" type="int">3</slot>  
<slot name="SeverityScale" type="int">1</slot>  
<slot name="\_score\_SeverityScale" type="string"></slot>  
<slot name="polarity" type="string">POSITIVE</slot>  
<slot name="DocType" type="string"></slot>  
<slot name="PatientID" type="int">0</slot>  
<slot name="DateObject" type="record"/>  
<slot name="enddate" type="date">  
<date day="5" month="1" year="1994"/>  
</slot>  
<slot name="\_score\_enddate" type="string"></slot>  
<slot name="startdate" type="date">  
<date day="5" month="1" year="1994"/>  
</slot>  
<slot name="\_score\_startdate" type="string"></slot>  
<slot name="Patient" type="string">PATIENT</slot>  
<slot name="\_score\_Patient" type="string"></slot>  
<slot name="\_keyref" type="record"/>  
<slot name="\_score" type="string"></slot>

```
<slot name="_type" type="string"></slot>
</record>
<record id="11" template="HealthStatusRecord">
<slot name="ScoreType" type="string">HealthStatusRecord</slot>
<slot name="_score_ScoreType" type="string">CORRECT</slot>
<slot name="source" type="string">C:\i2b2 eval\Subsets\Test\865.txt</slot>
<slot name="_score_source" type="string">CORRECT</slot>
<slot name="region" type="region">
<region end="11879" start="11875">pain</region>
</slot>
<slot name="_score_region" type="string">CORRECT</slot>
<slot name="rule" type="string">HealthStatusItemPkg/0</slot>
<slot name="ConceptName" type="string">PAIN</slot>
<slot name="_score_ConceptName" type="string">CORRECT</slot>
<slot name="SemanticType" type="string">Sign or Symptom</slot>
<slot name="BodyLocations" type="string"></slot>
<slot name="_score_BodyLocations" type="string">MISSING</slot>
<slot name="SeverityStrings" type="string"></slot>
<slot name="UMLS_CUI" type="string">C0030193</slot>
<slot name="DaysBeforeDeath" type="int">0</slot>
<slot name="PAIN" type="string">Y</slot>
<slot name="MaxPain" type="int">3</slot>
<slot name="SeverityScale" type="int">1</slot>
<slot name="_score_SeverityScale" type="string">CORRECT</slot>
<slot name="polarity" type="string">POSITIVE</slot>
```

```
<slot name="DocType" type="string"></slot>
<slot name="PatientID" type="int">0</slot>
<slot name="DateObject" type="record"/>
<slot name="enddate" type="date">
<date day="5" month="1" year="1994"/>
</slot>
<slot name="_score_enddate" type="string">CORRECT</slot>
<slot name="startdate" type="date">
<date day="5" month="1" year="1994"/>
</slot>
<slot name="_score_startdate" type="string">CORRECT</slot>
<slot name="Patient" type="string">PATIENT</slot>
<slot name="_score_Patient" type="string">CORRECT</slot>
<slot name="_keyref" type="record">
<record ref="10"/>
</slot>
<slot name="_score" type="string">INCORRECT</slot>
<slot name="_type" type="string"></slot>
</record>
<record id="12" template="HealthStatusRecord">
<slot name="ScoreType" type="string">HealthStatusRecord</slot>
<slot name="_score_ScoreType" type="string"></slot>
<slot name="source" type="string">C:\i2b2 eval\Subsets\Test\865.txt</slot>
<slot name="_score_source" type="string"></slot>
<slot name="region" type="region">
```

<region end="8063" start="8059">pain</region>  
</slot>  
<slot name="\_score\_region" type="string"></slot>  
<slot name="rule" type="string">HealthStatusItemPkg/0</slot>  
<slot name="ConceptName" type="string">PAIN</slot>  
<slot name="\_score\_ConceptName" type="string"></slot>  
<slot name="SemanticType" type="string">Sign or Symptom</slot>  
<slot name="BodyLocations" type="string">LEFT ARM</slot>  
<slot name="\_score\_BodyLocations" type="string"></slot>  
<slot name="SeverityStrings" type="string">CONSIDERABLE</slot>  
<slot name="UMLS\_CUI" type="string">C0030193</slot>  
<slot name="DaysBeforeDeath" type="int">0</slot>  
<slot name="PAIN" type="string">Y</slot>  
<slot name="MaxPain" type="int">3</slot>  
<slot name="SeverityScale" type="int">3</slot>  
<slot name="\_score\_SeverityScale" type="string"></slot>  
<slot name="polarity" type="string">POSITIVE</slot>  
<slot name="DocType" type="string"></slot>  
<slot name="PatientID" type="int">0</slot>  
<slot name="DateObject" type="record"/>  
<slot name="enddate" type="date">  
<date day="5" month="1" year="1994"/>  
</slot>  
<slot name="\_score\_enddate" type="string"></slot>  
<slot name="startdate" type="date">

```
<date day="5" month="1" year="1994"/>
</slot>
<slot name="_score_startdate" type="string"></slot>
<slot name="Patient" type="string">PATIENT</slot>
<slot name="_score_Patient" type="string"></slot>
<slot name="_keyref" type="record"/>
<slot name="_score" type="string"></slot>
<slot name="_type" type="string"></slot>
</record>
<record id="13" template="HealthStatusRecord">
<slot name="ScoreType" type="string">HealthStatusRecord</slot>
<slot name="_score_ScoreType" type="string">CORRECT</slot>
<slot name="source" type="string">C:\i2b2 eval\Subsets\Test\865.txt</slot>
<slot name="_score_source" type="string">CORRECT</slot>
<slot name="region" type="region">
<region end="8063" start="8059">pain</region>
</slot>
<slot name="_score_region" type="string">CORRECT</slot>
<slot name="rule" type="string">HealthStatusItemPkg/0</slot>
<slot name="ConceptName" type="string">PAIN</slot>
<slot name="_score_ConceptName" type="string">CORRECT</slot>
<slot name="SemanticType" type="string">Sign or Symptom</slot>
<slot name="BodyLocations" type="string"></slot>
<slot name="_score_BodyLocations" type="string">MISSING</slot>
<slot name="SeverityStrings" type="string">CONSIDERABLE</slot>
```



<slot name="UMLS\_CUI" type="string">C0030193</slot>  
<slot name="DaysBeforeDeath" type="int">0</slot>  
<slot name="PAIN" type="string">Y</slot>  
<slot name="MaxPain" type="int">3</slot>  
<slot name="SeverityScale" type="int">3</slot>  
<slot name="\_score\_SeverityScale" type="string">CORRECT</slot>  
<slot name="polarity" type="string">POSITIVE</slot>  
<slot name="DocType" type="string"></slot>  
<slot name="PatientID" type="int">0</slot>  
<slot name="DateObject" type="record"/>  
<slot name="enddate" type="date">  
<date day="5" month="1" year="1994"/>  
</slot>  
<slot name="\_score\_enddate" type="string">CORRECT</slot>  
<slot name="startdate" type="date">  
<date day="5" month="1" year="1994"/>  
</slot>  
<slot name="\_score\_startdate" type="string">CORRECT</slot>  
<slot name="Patient" type="string">PATIENT</slot>  
<slot name="\_score\_Patient" type="string">CORRECT</slot>  
<slot name="\_keyref" type="record">  
<record ref="12"/>  
</slot>  
<slot name="\_score" type="string">INCORRECT</slot>  
<slot name="\_type" type="string"></slot>

```
</record>
<record id="14" template="HealthStatusRecord">
  <slot name="ScoreType" type="string">HealthStatusRecord</slot>
  <slot name="_score_ScoreType" type="string"></slot>
  <slot name="source" type="string">C:\i2b2 eval\Subsets\Test\865.txt</slot>
  <slot name="_score_source" type="string"></slot>
  <slot name="region" type="region">
    <region end="7971" start="7967">pain</region>
  </slot>
  <slot name="_score_region" type="string"></slot>
  <slot name="rule" type="string">HealthStatusItemPkg/0</slot>
  <slot name="ConceptName" type="string">PAIN</slot>
  <slot name="_score_ConceptName" type="string"></slot>
  <slot name="SemanticType" type="string">Sign or Symptom</slot>
  <slot name="BodyLocations" type="string">LEFT ARM</slot>
  <slot name="_score_BodyLocations" type="string"></slot>
  <slot name="SeverityStrings" type="string"></slot>
  <slot name="UMLS_CUI" type="string">C0030193</slot>
  <slot name="DaysBeforeDeath" type="int">0</slot>
  <slot name="PAIN" type="string">Y</slot>
  <slot name="MaxPain" type="int">3</slot>
  <slot name="SeverityScale" type="int">3</slot>
  <slot name="_score_SeverityScale" type="string"></slot>
  <slot name="polarity" type="string">POSITIVE</slot>
  <slot name="DocType" type="string"></slot>
```

```
<slot name="PatientID" type="int">0</slot>
<slot name="DateObject" type="record"/>
<slot name="enddate" type="date">
<date day="5" month="1" year="1994"/>
</slot>
<slot name="_score_enddate" type="string"></slot>
<slot name="startdate" type="date">
<date day="5" month="1" year="1994"/>
</slot>
<slot name="_score_startdate" type="string"></slot>
<slot name="Patient" type="string">PATIENT</slot>
<slot name="_score_Patient" type="string"></slot>
<slot name="_keyref" type="record"/>
<slot name="_score" type="string"></slot>
<slot name="_type" type="string"></slot>
</record>
<record id="15" template="HealthStatusRecord">
<slot name="ScoreType" type="string">HealthStatusRecord</slot>
<slot name="_score_ScoreType" type="string">CORRECT</slot>
<slot name="source" type="string">C:\i2b2 eval\Subsets\Test\865.txt</slot>
<slot name="_score_source" type="string">CORRECT</slot>
<slot name="region" type="region">
<region end="7971" start="7967">pain</region>
</slot>
<slot name="_score_region" type="string">CORRECT</slot>
```

<slot name="rule" type="string">HealthStatusItemPkg/0</slot>  
<slot name="ConceptName" type="string">PAIN</slot>  
<slot name="\_score\_ConceptName" type="string">CORRECT</slot>  
<slot name="SemanticType" type="string">Sign or Symptom</slot>  
<slot name="BodyLocations" type="string"></slot>  
<slot name="\_score\_BodyLocations" type="string">MISSING</slot>  
<slot name="SeverityStrings" type="string"></slot>  
<slot name="UMLS\_CUI" type="string">C0030193</slot>  
<slot name="DaysBeforeDeath" type="int">0</slot>  
<slot name="PAIN" type="string">Y</slot>  
<slot name="MaxPain" type="int">3</slot>  
<slot name="SeverityScale" type="int">1</slot>  
<slot name="\_score\_SeverityScale" type="string">INCORRECT</slot>  
<slot name="polarity" type="string">POSITIVE</slot>  
<slot name="DocType" type="string"></slot>  
<slot name="PatientID" type="int">0</slot>  
<slot name="DateObject" type="record"/>  
<slot name="enddate" type="date">  
<date day="5" month="1" year="1994"/>  
</slot>  
<slot name="\_score\_enddate" type="string">CORRECT</slot>  
<slot name="startdate" type="date">  
<date day="5" month="1" year="1994"/>  
</slot>  
<slot name="\_score\_startdate" type="string">CORRECT</slot>

```
<slot name="Patient" type="string">PATIENT</slot>
<slot name="_score_Patient" type="string">CORRECT</slot>
<slot name="_keyref" type="record">
<record ref="14"/>
</slot>
<slot name="_score" type="string">INCORRECT</slot>
<slot name="_type" type="string"></slot>
</record>
<record id="16" template="HealthStatusRecord">
<slot name="ScoreType" type="string">HealthStatusRecord</slot>
<slot name="_score_ScoreType" type="string">MISSING</slot>
<slot name="source" type="string">C:\i2b2 eval\Subsets\Test\865.txt</slot>
<slot name="_score_source" type="string">MISSING</slot>
<slot name="region" type="region">
<region end="731" start="727">pain</region>
</slot>
<slot name="_score_region" type="string">MISSING</slot>
<slot name="rule" type="string"></slot>
<slot name="ConceptName" type="string">PAIN</slot>
<slot name="_score_ConceptName" type="string">MISSING</slot>
<slot name="SemanticType" type="string"></slot>
<slot name="BodyLocations" type="string">LEFT ARM</slot>
<slot name="_score_BodyLocations" type="string">MISSING</slot>
<slot name="SeverityStrings" type="string"></slot>
<slot name="UMLS_CUI" type="string"></slot>
```

```
<slot name="DaysBeforeDeath" type="int">0</slot>
<slot name="PAIN" type="string">Y</slot>
<slot name="MaxPain" type="int">0</slot>
<slot name="SeverityScale" type="int">1</slot>
<slot name="_score_SeverityScale" type="string">MISSING</slot>
<slot name="polarity" type="string"></slot>
<slot name="DocType" type="string"></slot>
<slot name="PatientID" type="int">0</slot>
<slot name="DateObject" type="record"/>
<slot name="enddate" type="date">
<date day="5" month="1" year="1994"/>
</slot>
<slot name="_score_enddate" type="string">MISSING</slot>
<slot name="startdate" type="date">
<date day="5" month="1" year="1994"/>
</slot>
<slot name="_score_startdate" type="string">MISSING</slot>
<slot name="Patient" type="string"></slot>
<slot name="_score_Patient" type="string"></slot>
<slot name="_keyref" type="record"/>
<slot name="_score" type="string">MISSING</slot>
<slot name="_type" type="string"></slot>
</record>
</records>
</infStore>
```

```
<?xml version="1.0" encoding="UTF-8"?>
<infStore>
<records>
<record id="0" template="HealthStatusRecord">
<slot name="ScoreType" type="string">HealthStatusRecord</slot>
<slot name="_score_ScoreType" type="string">CORRECT</slot>
<slot name="source" type="string">C:\i2b2 eval\Subsets\Test\873.txt</slot>
<slot name="_score_source" type="string">CORRECT</slot>
<slot name="region" type="region">
<region end="6749" start="6739">discomfort</region>
</slot>
<slot name="_score_region" type="string">CORRECT</slot>
<slot name="rule" type="string">HealthStatusItemPkg/0</slot>
<slot name="ConceptName" type="string">DISCOMFORT</slot>
<slot name="_score_ConceptName" type="string">CORRECT</slot>
<slot name="SemanticType" type="string">Sign or Symptom</slot>
<slot name="BodyLocations" type="string">EPIGASTRIC</slot>
<slot name="_score_BodyLocations" type="string">CORRECT</slot>
<slot name="SeverityStrings" type="string">MILD</slot>
<slot name="UMLS_CUI" type="string">C2737161</slot>
<slot name="DaysBeforeDeath" type="int">0</slot>
<slot name="PAIN" type="string">Y</slot>
<slot name="MaxPain" type="int">1</slot>
<slot name="SeverityScale" type="int">1</slot>
<slot name="_score_SeverityScale" type="string">CORRECT</slot>
```

```
<slot name="polarity" type="string">POSITIVE</slot>
<slot name="DocType" type="string"></slot>
<slot name="PatientID" type="int">0</slot>
<slot name="DateObject" type="record"/>
<slot name="enddate" type="date">
<date day="4" month="4" year="1999"/>
</slot>
<slot name="_score_enddate" type="string">CORRECT</slot>
<slot name="startdate" type="date">
<date day="4" month="4" year="1999"/>
</slot>
<slot name="_score_startdate" type="string">CORRECT</slot>
<slot name="Patient" type="string">PATIENT</slot>
<slot name="_score_Patient" type="string">CORRECT</slot>
<slot name="_keyref" type="record"/>
<slot name="_score" type="string">CORRECT</slot>
<slot name="_type" type="string"></slot>
</record>
<record id="1" template="HealthStatusRecord">
<slot name="ScoreType" type="string">HealthStatusRecord</slot>
<slot name="_score_ScoreType" type="string"></slot>
<slot name="source" type="string">C:\i2b2 eval\Subsets\Test\873.txt</slot>
<slot name="_score_source" type="string"></slot>
<slot name="region" type="region">
<region end="1246" start="1236">discomfort</region>
```



</slot>  
<slot name="\_score\_region" type="string"></slot>  
<slot name="rule" type="string">HealthStatusItemPkg/0</slot>  
<slot name="ConceptName" type="string">DISCOMFORT</slot>  
<slot name="\_score\_ConceptName" type="string"></slot>  
<slot name="SemanticType" type="string">Sign or Symptom</slot>  
<slot name="BodyLocations" type="string">SUPRAPUBIC</slot>  
<slot name="\_score\_BodyLocations" type="string"></slot>  
<slot name="SeverityStrings" type="string"></slot>  
<slot name="UMLS\_CUI" type="string">C2737161</slot>  
<slot name="DaysBeforeDeath" type="int">0</slot>  
<slot name="PAIN" type="string">Y</slot>  
<slot name="MaxPain" type="int">1</slot>  
<slot name="SeverityScale" type="int">1</slot>  
<slot name="\_score\_SeverityScale" type="string"></slot>  
<slot name="polarity" type="string">POSITIVE</slot>  
<slot name="DocType" type="string"></slot>  
<slot name="PatientID" type="int">0</slot>  
<slot name="DateObject" type="record"/>  
<slot name="enddate" type="date">  
<date day="30" month="3" year="1999"/>  
</slot>  
<slot name="\_score\_enddate" type="string"></slot>  
<slot name="startdate" type="date">  
<date day="30" month="3" year="1999"/>

```
</slot>
<slot name="_score_startdate" type="string"></slot>
<slot name="Patient" type="string">PATIENT</slot>
<slot name="_score_Patient" type="string"></slot>
<slot name="_keyref" type="record"/>
<slot name="_score" type="string"></slot>
<slot name="_type" type="string"></slot>
</record>
<record id="2" template="HealthStatusRecord">
<slot name="ScoreType" type="string">HealthStatusRecord</slot>
<slot name="_score_ScoreType" type="string">CORRECT</slot>
<slot name="source" type="string">C:\i2b2 eval\Subsets\Test\873.txt</slot>
<slot name="_score_source" type="string">CORRECT</slot>
<slot name="region" type="region">
<region end="7110" start="7096">abdominal pain</region>
</slot>
<slot name="_score_region" type="string">CORRECT</slot>
<slot name="rule" type="string">HealthStatusItemPkg/0</slot>
<slot name="ConceptName" type="string">ABDOMINAL PAIN</slot>
<slot name="_score_ConceptName" type="string">CORRECT</slot>
<slot name="SemanticType" type="string">Sign or Symptom</slot>
<slot name="BodyLocations" type="string">ABDOMEN</slot>
<slot name="_score_BodyLocations" type="string">CORRECT</slot>
<slot name="SeverityStrings" type="string"></slot>
<slot name="UMLS_CUI" type="string">C0000737</slot>
```

```
<slot name="DaysBeforeDeath" type="int">0</slot>
<slot name="PAIN" type="string">Y</slot>
<slot name="MaxPain" type="int">1</slot>
<slot name="SeverityScale" type="int">1</slot>
<slot name="_score_SeverityScale" type="string">CORRECT</slot>
<slot name="polarity" type="string">POSITIVE</slot>
<slot name="DocType" type="string"></slot>
<slot name="PatientID" type="int">0</slot>
<slot name="DateObject" type="record"/>
<slot name="enddate" type="date">
<date day="10" month="4" year="1999"/>
</slot>
<slot name="_score_enddate" type="string">CORRECT</slot>
<slot name="startdate" type="date">
<date day="4" month="4" year="1999"/>
</slot>
<slot name="_score_startdate" type="string">CORRECT</slot>
<slot name="Patient" type="string">PATIENT</slot>
<slot name="_score_Patient" type="string">CORRECT</slot>
<slot name="_keyref" type="record"/>
<slot name="_score" type="string">CORRECT</slot>
<slot name="_type" type="string"></slot>
</record>
<record id="3" template="HealthStatusRecord">
<slot name="ScoreType" type="string">HealthStatusRecord</slot>
```

<slot name="\_score\_ScoreType" type="string"></slot>  
<slot name="source" type="string">C:\i2b2 eval\Subsets\Test\873.txt</slot>  
<slot name="\_score\_source" type="string"></slot>  
<slot name="region" type="region">  
<region end="1898" start="1888">chest pain</region>  
</slot>  
<slot name="\_score\_region" type="string"></slot>  
<slot name="rule" type="string">HealthStatusItemPkg/0</slot>  
<slot name="ConceptName" type="string">CHEST PAIN UNSPECIFIED</slot>  
<slot name="\_score\_ConceptName" type="string"></slot>  
<slot name="SemanticType" type="string">Sign or Symptom</slot>  
<slot name="BodyLocations" type="string">CHEST</slot>  
<slot name="\_score\_BodyLocations" type="string"></slot>  
<slot name="SeverityStrings" type="string">DENIES ANY</slot>  
<slot name="UMLS\_CUI" type="string">C1535568</slot>  
<slot name="DaysBeforeDeath" type="int">0</slot>  
<slot name="PAIN" type="string">Y</slot>  
<slot name="MaxPain" type="int">1</slot>  
<slot name="SeverityScale" type="int">0</slot>  
<slot name="\_score\_SeverityScale" type="string"></slot>  
<slot name="polarity" type="string">POSITIVE</slot>  
<slot name="DocType" type="string"></slot>  
<slot name="PatientID" type="int">0</slot>  
<slot name="DateObject" type="record"/>  
<slot name="enddate" type="date">

```
<date day="30" month="3" year="1999"/>
</slot>
<slot name="_score_enddate" type="string"></slot>
<slot name="startdate" type="date">
<date day="30" month="3" year="1999"/>
</slot>
<slot name="_score_startdate" type="string"></slot>
<slot name="Patient" type="string">PATIENT</slot>
<slot name="_score_Patient" type="string"></slot>
<slot name="_keyref" type="record"/>
<slot name="_score" type="string"></slot>
<slot name="_type" type="string"></slot>
</record>
<record id="4" template="HealthStatusRecord">
<slot name="ScoreType" type="string">HealthStatusRecord</slot>
<slot name="_score_ScoreType" type="string">CORRECT</slot>
<slot name="source" type="string">C:\i2b2 eval\Subsets\Test\873.txt</slot>
<slot name="_score_source" type="string">CORRECT</slot>
<slot name="region" type="region">
<region end="1116" start="1106">discomfort</region>
</slot>
<slot name="_score_region" type="string">CORRECT</slot>
<slot name="rule" type="string">HealthStatusItemPkg/0</slot>
<slot name="ConceptName" type="string">DISCOMFORT</slot>
<slot name="_score_ConceptName" type="string">CORRECT</slot>
```

<slot name="SemanticType" type="string">Sign or Symptom</slot>  
<slot name="BodyLocations" type="string">SUPRAPUBIC</slot>  
<slot name="\_score\_BodyLocations" type="string">CORRECT</slot>  
<slot name="SeverityStrings" type="string"></slot>  
<slot name="UMLS\_CUI" type="string">C2737161</slot>  
<slot name="DaysBeforeDeath" type="int">0</slot>  
<slot name="PAIN" type="string">Y</slot>  
<slot name="MaxPain" type="int">1</slot>  
<slot name="SeverityScale" type="int">1</slot>  
<slot name="\_score\_SeverityScale" type="string">CORRECT</slot>  
<slot name="polarity" type="string">POSITIVE</slot>  
<slot name="DocType" type="string"></slot>  
<slot name="PatientID" type="int">0</slot>  
<slot name="DateObject" type="record"/>  
<slot name="enddate" type="date">  
<date day="30" month="3" year="1999"/>  
</slot>  
<slot name="\_score\_enddate" type="string">CORRECT</slot>  
<slot name="startdate" type="date">  
<date day="30" month="3" year="1999"/>  
</slot>  
<slot name="\_score\_startdate" type="string">CORRECT</slot>  
<slot name="Patient" type="string">PATIENT</slot>  
<slot name="\_score\_Patient" type="string">CORRECT</slot>  
<slot name="\_keyref" type="record"/>

```
<slot name="_score" type="string">CORRECT</slot>
<slot name="_type" type="string"></slot>
</record>
<record id="5" template="HealthStatusRecord">
<slot name="ScoreType" type="string">HealthStatusRecord</slot>
<slot name="_score_ScoreType" type="string"></slot>
<slot name="source" type="string">C:\i2b2 eval\Subsets\Test\873.txt</slot>
<slot name="_score_source" type="string"></slot>
<slot name="region" type="region">
<region end="1246" start="1236">discomfort</region>
</slot>
<slot name="_score_region" type="string"></slot>
<slot name="rule" type="string">HealthStatusItemPkg/0</slot>
<slot name="ConceptName" type="string">DISCOMFORT</slot>
<slot name="_score_ConceptName" type="string"></slot>
<slot name="SemanticType" type="string">Sign or Symptom</slot>
<slot name="BodyLocations" type="string">SUPRAPUBIC</slot>
<slot name="_score_BodyLocations" type="string"></slot>
<slot name="SeverityStrings" type="string"></slot>
<slot name="UMLS_CUI" type="string">C2737161</slot>
<slot name="DaysBeforeDeath" type="int">0</slot>
<slot name="PAIN" type="string">Y</slot>
<slot name="MaxPain" type="int">1</slot>
<slot name="SeverityScale" type="int">1</slot>
<slot name="_score_SeverityScale" type="string"></slot>
```

```
<slot name="polarity" type="string">POSITIVE</slot>
<slot name="DocType" type="string"></slot>
<slot name="PatientID" type="int">0</slot>
<slot name="DateObject" type="record"/>
<slot name="enddate" type="date">
<date day="30" month="3" year="1999"/>
</slot>
<slot name="_score_enddate" type="string"></slot>
<slot name="startdate" type="date">
<date day="30" month="3" year="1999"/>
</slot>
<slot name="_score_startdate" type="string"></slot>
<slot name="Patient" type="string">PATIENT</slot>
<slot name="_score_Patient" type="string"></slot>
<slot name="_keyref" type="record"/>
<slot name="_score" type="string"></slot>
<slot name="_type" type="string"></slot>
</record>
<record id="6" template="HealthStatusRecord">
<slot name="ScoreType" type="string">HealthStatusRecord</slot>
<slot name="_score_ScoreType" type="string">CORRECT</slot>
<slot name="source" type="string">C:\i2b2 eval\Subsets\Test\873.txt</slot>
<slot name="_score_source" type="string">CORRECT</slot>
<slot name="region" type="region">
<region end="1246" start="1236">discomfort</region>
```



</slot>  
<slot name="\_score\_region" type="string">CORRECT</slot>  
<slot name="rule" type="string">HealthStatusItemPkg/0</slot>  
<slot name="ConceptName" type="string">DISCOMFORT</slot>  
<slot name="\_score\_ConceptName" type="string">CORRECT</slot>  
<slot name="SemanticType" type="string">Sign or Symptom</slot>  
<slot name="BodyLocations" type="string"></slot>  
<slot name="\_score\_BodyLocations" type="string">MISSING</slot>  
<slot name="SeverityStrings" type="string"></slot>  
<slot name="UMLS\_CUI" type="string">C2737161</slot>  
<slot name="DaysBeforeDeath" type="int">0</slot>  
<slot name="PAIN" type="string">Y</slot>  
<slot name="MaxPain" type="int">1</slot>  
<slot name="SeverityScale" type="int">1</slot>  
<slot name="\_score\_SeverityScale" type="string">CORRECT</slot>  
<slot name="polarity" type="string">POSITIVE</slot>  
<slot name="DocType" type="string"></slot>  
<slot name="PatientID" type="int">0</slot>  
<slot name="DateObject" type="record"/>  
<slot name="enddate" type="date">  
<date day="30" month="3" year="1999"/>  
</slot>  
<slot name="\_score\_enddate" type="string">CORRECT</slot>  
<slot name="startdate" type="date">  
<date day="30" month="3" year="1999"/>

```
</slot>
<slot name="_score_startdate" type="string">CORRECT</slot>
<slot name="Patient" type="string">PATIENT</slot>
<slot name="_score_Patient" type="string">CORRECT</slot>
<slot name="_keyref" type="record">
<record ref="5"/>
</slot>
<slot name="_score" type="string">INCORRECT</slot>
<slot name="_type" type="string"></slot>
</record>
<record id="7" template="HealthStatusRecord">
<slot name="ScoreType" type="string">HealthStatusRecord</slot>
<slot name="_score_ScoreType" type="string"></slot>
<slot name="source" type="string">C:\i2b2 eval\Subsets\Test\873.txt</slot>
<slot name="_score_source" type="string"></slot>
<slot name="region" type="region">
<region end="1898" start="1888">chest pain</region>
</slot>
<slot name="_score_region" type="string"></slot>
<slot name="rule" type="string">HealthStatusItemPkg/0</slot>
<slot name="ConceptName" type="string">CHEST PAIN UNSPECIFIED</slot>
<slot name="_score_ConceptName" type="string"></slot>
<slot name="SemanticType" type="string">Sign or Symptom</slot>
<slot name="BodyLocations" type="string">CHEST</slot>
<slot name="_score_BodyLocations" type="string"></slot>
```

```
<slot name="SeverityStrings" type="string">DENIES ANY</slot>
<slot name="UMLS_CUI" type="string">C1535568</slot>
<slot name="DaysBeforeDeath" type="int">0</slot>
<slot name="PAIN" type="string">Y</slot>
<slot name="MaxPain" type="int">1</slot>
<slot name="SeverityScale" type="int">0</slot>
<slot name="_score_SeverityScale" type="string"></slot>
<slot name="polarity" type="string">POSITIVE</slot>
<slot name="DocType" type="string"></slot>
<slot name="PatientID" type="int">0</slot>
<slot name="DateObject" type="record"/>
<slot name="enddate" type="date">
<date day="30" month="3" year="1999"/>
</slot>
<slot name="_score_enddate" type="string"></slot>
<slot name="startdate" type="date">
<date day="30" month="3" year="1999"/>
</slot>
<slot name="_score_startdate" type="string"></slot>
<slot name="Patient" type="string">PATIENT</slot>
<slot name="_score_Patient" type="string"></slot>
<slot name="_keyref" type="record"/>
<slot name="_score" type="string"></slot>
<slot name="_type" type="string"></slot>
</record>
```

```
<record id="8" template="HealthStatusRecord">
  <slot name="ScoreType" type="string">HealthStatusRecord</slot>
  <slot name="_score_ScoreType" type="string">CORRECT</slot>
  <slot name="source" type="string">C:\i2b2 eval\Subsets\Test\873.txt</slot>
  <slot name="_score_source" type="string">CORRECT</slot>
  <slot name="region" type="region">
    <region end="1898" start="1888">chest pain</region>
  </slot>
  <slot name="_score_region" type="string">CORRECT</slot>
  <slot name="rule" type="string">HealthStatusItemPkg/0</slot>
  <slot name="ConceptName" type="string">CHEST PAIN</slot>
  <slot name="_score_ConceptName" type="string">INCORRECT</slot>
  <slot name="SemanticType" type="string">Sign or Symptom</slot>
  <slot name="BodyLocations" type="string">CHEST</slot>
  <slot name="_score_BodyLocations" type="string">CORRECT</slot>
  <slot name="SeverityStrings" type="string">DENIES ANY</slot>
  <slot name="UMLS_CUI" type="string">C0008031</slot>
  <slot name="DaysBeforeDeath" type="int">0</slot>
  <slot name="PAIN" type="string">Y</slot>
  <slot name="MaxPain" type="int">1</slot>
  <slot name="SeverityScale" type="int">0</slot>
  <slot name="_score_SeverityScale" type="string">CORRECT</slot>
  <slot name="polarity" type="string">POSITIVE</slot>
  <slot name="DocType" type="string"></slot>
  <slot name="PatientID" type="int">0</slot>
```

```
<slot name="DateObject" type="record"/>
<slot name="enddate" type="date">
<date day="30" month="3" year="1999"/>
</slot>
<slot name="_score_enddate" type="string">CORRECT</slot>
<slot name="startdate" type="date">
<date day="30" month="3" year="1999"/>
</slot>
<slot name="_score_startdate" type="string">CORRECT</slot>
<slot name="Patient" type="string">PATIENT</slot>
<slot name="_score_Patient" type="string">CORRECT</slot>
<slot name="_keyref" type="record">
<record ref="7"/>
</slot>
<slot name="_score" type="string">INCORRECT</slot>
<slot name="_type" type="string"></slot>
</record>
</records>
</infStore>
<?xml version="1.0" encoding="UTF-8"?>
<infStore>
<records>
<record id="0" template="HealthStatusRecord">
<slot name="ScoreType" type="string">HealthStatusRecord</slot>
<slot name="_score_ScoreType" type="string">CORRECT</slot>
```

<slot name="source" type="string">C:\i2b2 eval\Subsets\Test\874.txt</slot>  
<slot name="\_score\_source" type="string">CORRECT</slot>  
<slot name="region" type="region">  
<region end="1755" start="1743">claudication</region>  
</slot>  
<slot name="\_score\_region" type="string">CORRECT</slot>  
<slot name="rule" type="string">HealthStatusItemPkg/0</slot>  
<slot name="ConceptName" type="string">LOWER EXTREMITY EXERTIONAL  
PAIN</slot>  
<slot name="\_score\_ConceptName" type="string">CORRECT</slot>  
<slot name="SemanticType" type="string">Sign or Symptom</slot>  
<slot name="BodyLocations" type="string">LEGS</slot>  
<slot name="\_score\_BodyLocations" type="string">CORRECT</slot>  
<slot name="SeverityStrings" type="string"></slot>  
<slot name="UMLS\_CUI" type="string">C1456822</slot>  
<slot name="DaysBeforeDeath" type="int">0</slot>  
<slot name="PAIN" type="string">Y</slot>  
<slot name="MaxPain" type="int">1</slot>  
<slot name="SeverityScale" type="int">1</slot>  
<slot name="\_score\_SeverityScale" type="string">CORRECT</slot>  
<slot name="polarity" type="string">POSITIVE</slot>  
<slot name="DocType" type="string"></slot>  
<slot name="PatientID" type="int">0</slot>  
<slot name="DateObject" type="record"/>  
<slot name="enddate" type="date">

```
<date day="18" month="1" year="2001"/>
</slot>
<slot name="_score_enddate" type="string">CORRECT</slot>
<slot name="startdate" type="date">
<date day="18" month="1" year="2001"/>
</slot>
<slot name="_score_startdate" type="string">CORRECT</slot>
<slot name="Patient" type="string">PATIENT</slot>
<slot name="_score_Patient" type="string">CORRECT</slot>
<slot name="_keyref" type="record"/>
<slot name="_score" type="string">CORRECT</slot>
<slot name="_type" type="string"></slot>
</record>
<record id="1" template="HealthStatusRecord">
<slot name="ScoreType" type="string">HealthStatusRecord</slot>
<slot name="_score_ScoreType" type="string">CORRECT</slot>
<slot name="source" type="string">C:\i2b2 eval\Subsets\Test\874.txt</slot>
<slot name="_score_source" type="string">CORRECT</slot>
<slot name="region" type="region">
<region end="538" start="526">claudication</region>
</slot>
<slot name="_score_region" type="string">CORRECT</slot>
<slot name="rule" type="string">HealthStatusItemPkg/0</slot>
<slot name="ConceptName" type="string">LOWER EXTREMITY EXERTIONAL
PAIN</slot>
```

<slot name="\_score\_ConceptName" type="string">CORRECT</slot>  
<slot name="SemanticType" type="string">Sign or Symptom</slot>  
<slot name="BodyLocations" type="string">LEGS</slot>  
<slot name="\_score\_BodyLocations" type="string">CORRECT</slot>  
<slot name="SeverityStrings" type="string">RECURRENT</slot>  
<slot name="UMLS\_CUI" type="string">C1456822</slot>  
<slot name="DaysBeforeDeath" type="int">0</slot>  
<slot name="PAIN" type="string">Y</slot>  
<slot name="MaxPain" type="int">1</slot>  
<slot name="SeverityScale" type="int">1</slot>  
<slot name="\_score\_SeverityScale" type="string">CORRECT</slot>  
<slot name="polarity" type="string">POSITIVE</slot>  
<slot name="DocType" type="string"></slot>  
<slot name="PatientID" type="int">0</slot>  
<slot name="DateObject" type="record"/>  
<slot name="enddate" type="date">  
<date day="18" month="1" year="2001"/>  
</slot>  
<slot name="\_score\_enddate" type="string">CORRECT</slot>  
<slot name="startdate" type="date">  
<date day="18" month="8" year="2000"/>  
</slot>  
<slot name="\_score\_startdate" type="string">CORRECT</slot>  
<slot name="Patient" type="string">PATIENT</slot>  
<slot name="\_score\_Patient" type="string">CORRECT</slot>



```
<slot name="_keyref" type="record"/>
<slot name="_score" type="string">CORRECT</slot>
<slot name="_type" type="string"></slot>
</record>
</records>
</infStore>
<?xml version="1.0" encoding="UTF-8"?>
<infStore>
<records>
<record id="0" template="HealthStatusRecord">
<slot name="ScoreType" type="string">HealthStatusRecord</slot>
<slot name="_score_ScoreType" type="string"></slot>
<slot name="source" type="string">C:\i2b2 eval\Subsets\Test\880.txt</slot>
<slot name="_score_source" type="string"></slot>
<slot name="region" type="region">
<region end="893" start="880">low back pain</region>
</slot>
<slot name="_score_region" type="string"></slot>
<slot name="rule" type="string">HealthStatusItemPkg/0</slot>
<slot name="ConceptName" type="string">LOWER BACK PAINS</slot>
<slot name="_score_ConceptName" type="string"></slot>
<slot name="SemanticType" type="string">Sign or Symptom</slot>
<slot name="BodyLocations" type="string">LOWER BACK</slot>
<slot name="_score_BodyLocations" type="string"></slot>
<slot name="SeverityStrings" type="string"></slot>
```

```
<slot name="UMLS_CUI" type="string">C0024031</slot>
<slot name="DaysBeforeDeath" type="int">0</slot>
<slot name="PAIN" type="string">Y</slot>
<slot name="MaxPain" type="int">1</slot>
<slot name="SeverityScale" type="int">1</slot>
<slot name="_score_SeverityScale" type="string"></slot>
<slot name="polarity" type="string">POSITIVE</slot>
<slot name="DocType" type="string"></slot>
<slot name="PatientID" type="int">0</slot>
<slot name="DateObject" type="record"/>
<slot name="enddate" type="date">
<date day="23" month="9" year="2000"/>
</slot>
<slot name="_score_enddate" type="string"></slot>
<slot name="startdate" type="date">
<date day="23" month="5" year="2000"/>
</slot>
<slot name="_score_startdate" type="string"></slot>
<slot name="Patient" type="string">PATIENT</slot>
<slot name="_score_Patient" type="string"></slot>
<slot name="_keyref" type="record"/>
<slot name="_score" type="string"></slot>
<slot name="_type" type="string"></slot>
</record>
<record id="1" template="HealthStatusRecord">
```

<slot name="ScoreType" type="string">HealthStatusRecord</slot>  
<slot name="\_score\_ScoreType" type="string">CORRECT</slot>  
<slot name="source" type="string">C:\i2b2 eval\Subsets\Test\880.txt</slot>  
<slot name="\_score\_source" type="string">CORRECT</slot>  
<slot name="region" type="region">  
<region end="893" start="880">low back pain</region>  
</slot>  
<slot name="\_score\_region" type="string">CORRECT</slot>  
<slot name="rule" type="string">HealthStatusItemPkg/0</slot>  
<slot name="ConceptName" type="string">LOWER BACK PAINS</slot>  
<slot name="\_score\_ConceptName" type="string">CORRECT</slot>  
<slot name="SemanticType" type="string">Sign or Symptom</slot>  
<slot name="BodyLocations" type="string">LOWER BACK</slot>  
<slot name="\_score\_BodyLocations" type="string">CORRECT</slot>  
<slot name="SeverityStrings" type="string"></slot>  
<slot name="UMLS\_CUI" type="string">C0024031</slot>  
<slot name="DaysBeforeDeath" type="int">0</slot>  
<slot name="PAIN" type="string">Y</slot>  
<slot name="MaxPain" type="int">1</slot>  
<slot name="SeverityScale" type="int">1</slot>  
<slot name="\_score\_SeverityScale" type="string">CORRECT</slot>  
<slot name="polarity" type="string">POSITIVE</slot>  
<slot name="DocType" type="string"></slot>  
<slot name="PatientID" type="int">0</slot>  
<slot name="DateObject" type="record"/>

```
<slot name="enddate" type="date">
<date day="23" month="9" year="2000"/>
</slot>
<slot name="_score_enddate" type="string">CORRECT</slot>
<slot name="startdate" type="date">
<date day="23" month="9" year="2000"/>
</slot>
<slot name="_score_startdate" type="string">INCORRECT</slot>
<slot name="Patient" type="string">PATIENT</slot>
<slot name="_score_Patient" type="string">CORRECT</slot>
<slot name="_keyref" type="record">
<record ref="0"/>
</slot>
<slot name="_score" type="string">INCORRECT</slot>
<slot name="_type" type="string"></slot>
</record>
<record id="2" template="HealthStatusRecord">
<slot name="ScoreType" type="string">HealthStatusRecord</slot>
<slot name="_score_ScoreType" type="string">CORRECT</slot>
<slot name="source" type="string">C:\i2b2 eval\Subsets\Test\880.txt</slot>
<slot name="_score_source" type="string">CORRECT</slot>
<slot name="region" type="region">
<region end="978" start="969">back pain</region>
</slot>
<slot name="_score_region" type="string">CORRECT</slot>
```

<slot name="rule" type="string">HealthStatusItemPkg/0</slot>  
<slot name="ConceptName" type="string">BACK PAINS</slot>  
<slot name="\_score\_ConceptName" type="string">CORRECT</slot>  
<slot name="SemanticType" type="string">Sign or Symptom</slot>  
<slot name="BodyLocations" type="string">BACK</slot>  
<slot name="\_score\_BodyLocations" type="string">CORRECT</slot>  
<slot name="SeverityStrings" type="string"></slot>  
<slot name="UMLS\_CUI" type="string">C0004604</slot>  
<slot name="DaysBeforeDeath" type="int">0</slot>  
<slot name="PAIN" type="string">Y</slot>  
<slot name="MaxPain" type="int">1</slot>  
<slot name="SeverityScale" type="int">1</slot>  
<slot name="\_score\_SeverityScale" type="string">CORRECT</slot>  
<slot name="polarity" type="string">POSITIVE</slot>  
<slot name="DocType" type="string"></slot>  
<slot name="PatientID" type="int">0</slot>  
<slot name="DateObject" type="record"/>  
<slot name="enddate" type="date">  
<date day="23" month="9" year="2000"/>  
</slot>  
<slot name="\_score\_enddate" type="string">CORRECT</slot>  
<slot name="startdate" type="date">  
<date day="23" month="9" year="2000"/>  
</slot>  
<slot name="\_score\_startdate" type="string">CORRECT</slot>

```
<slot name="Patient" type="string">PATIENT</slot>
<slot name="_score_Patient" type="string">CORRECT</slot>
<slot name="_keyref" type="record"/>
<slot name="_score" type="string">CORRECT</slot>
<slot name="_type" type="string"></slot>
</record>
<record id="3" template="HealthStatusRecord">
<slot name="ScoreType" type="string">HealthStatusRecord</slot>
<slot name="_score_ScoreType" type="string"></slot>
<slot name="source" type="string">C:\i2b2 eval\Subsets\Test\880.txt</slot>
<slot name="_score_source" type="string"></slot>
<slot name="region" type="region">
<region end="853" start="849">pain</region>
</slot>
<slot name="_score_region" type="string"></slot>
<slot name="rule" type="string">HealthStatusItemPkg/0</slot>
<slot name="ConceptName" type="string">PAIN</slot>
<slot name="_score_ConceptName" type="string"></slot>
<slot name="SemanticType" type="string">Sign or Symptom</slot>
<slot name="BodyLocations" type="string">GROIN</slot>
<slot name="_score_BodyLocations" type="string"></slot>
<slot name="SeverityStrings" type="string"></slot>
<slot name="UMLS_CUI" type="string">C0030193</slot>
<slot name="DaysBeforeDeath" type="int">0</slot>
<slot name="PAIN" type="string">Y</slot>
```

```
<slot name="MaxPain" type="int">1</slot>
<slot name="SeverityScale" type="int">1</slot>
<slot name="_score_SeverityScale" type="string"></slot>
<slot name="polarity" type="string">POSITIVE</slot>
<slot name="DocType" type="string"></slot>
<slot name="PatientID" type="int">0</slot>
<slot name="DateObject" type="record"/>
<slot name="enddate" type="date">
<date day="23" month="9" year="2000"/>
</slot>
<slot name="_score_enddate" type="string"></slot>
<slot name="startdate" type="date">
<date day="23" month="9" year="2000"/>
</slot>
<slot name="_score_startdate" type="string"></slot>
<slot name="Patient" type="string">PATIENT</slot>
<slot name="_score_Patient" type="string"></slot>
<slot name="_keyref" type="record"/>
<slot name="_score" type="string"></slot>
<slot name="_type" type="string"></slot>
</record>
<record id="4" template="HealthStatusRecord">
<slot name="ScoreType" type="string">HealthStatusRecord</slot>
<slot name="_score_ScoreType" type="string"></slot>
<slot name="source" type="string">C:\i2b2 eval\Subsets\Test\880.txt</slot>
```

<slot name="\_score\_source" type="string"></slot>  
<slot name="region" type="region">  
<region end="893" start="880">low back pain</region>  
</slot>  
<slot name="\_score\_region" type="string"></slot>  
<slot name="rule" type="string">HealthStatusItemPkg/0</slot>  
<slot name="ConceptName" type="string">LOWER BACK PAINS</slot>  
<slot name="\_score\_ConceptName" type="string"></slot>  
<slot name="SemanticType" type="string">Sign or Symptom</slot>  
<slot name="BodyLocations" type="string">LOWER BACK</slot>  
<slot name="\_score\_BodyLocations" type="string"></slot>  
<slot name="SeverityStrings" type="string"></slot>  
<slot name="UMLS\_CUI" type="string">C0024031</slot>  
<slot name="DaysBeforeDeath" type="int">0</slot>  
<slot name="PAIN" type="string">Y</slot>  
<slot name="MaxPain" type="int">1</slot>  
<slot name="SeverityScale" type="int">1</slot>  
<slot name="\_score\_SeverityScale" type="string"></slot>  
<slot name="polarity" type="string">POSITIVE</slot>  
<slot name="DocType" type="string"></slot>  
<slot name="PatientID" type="int">0</slot>  
<slot name="DateObject" type="record"/>  
<slot name="enddate" type="date">  
<date day="23" month="9" year="2000"/>  
</slot>



```
<slot name="_score_enddate" type="string"></slot>
<slot name="startdate" type="date">
<date day="23" month="5" year="2000"/>
</slot>
<slot name="_score_startdate" type="string"></slot>
<slot name="Patient" type="string">PATIENT</slot>
<slot name="_score_Patient" type="string"></slot>
<slot name="_keyref" type="record"/>
<slot name="_score" type="string"></slot>
<slot name="_type" type="string"></slot>
</record>
<record id="5" template="HealthStatusRecord">
<slot name="ScoreType" type="string">HealthStatusRecord</slot>
<slot name="_score_ScoreType" type="string"></slot>
<slot name="source" type="string">C:\i2b2 eval\Subsets\Test\880.txt</slot>
<slot name="_score_source" type="string"></slot>
<slot name="region" type="region">
<region end="853" start="849">pain</region>
</slot>
<slot name="_score_region" type="string"></slot>
<slot name="rule" type="string">HealthStatusItemPkg/0</slot>
<slot name="ConceptName" type="string">PAIN</slot>
<slot name="_score_ConceptName" type="string"></slot>
<slot name="SemanticType" type="string">Sign or Symptom</slot>
<slot name="BodyLocations" type="string">GROIN</slot>
```

<slot name="\_score\_BodyLocations" type="string"></slot>  
<slot name="SeverityStrings" type="string"></slot>  
<slot name="UMLS\_CUI" type="string">C0030193</slot>  
<slot name="DaysBeforeDeath" type="int">0</slot>  
<slot name="PAIN" type="string">Y</slot>  
<slot name="MaxPain" type="int">1</slot>  
<slot name="SeverityScale" type="int">1</slot>  
<slot name="\_score\_SeverityScale" type="string"></slot>  
<slot name="polarity" type="string">POSITIVE</slot>  
<slot name="DocType" type="string"></slot>  
<slot name="PatientID" type="int">0</slot>  
<slot name="DateObject" type="record"/>  
<slot name="enddate" type="date">  
<date day="23" month="9" year="2000"/>  
</slot>  
<slot name="\_score\_enddate" type="string"></slot>  
<slot name="startdate" type="date">  
<date day="23" month="9" year="2000"/>  
</slot>  
<slot name="\_score\_startdate" type="string"></slot>  
<slot name="Patient" type="string">PATIENT</slot>  
<slot name="\_score\_Patient" type="string"></slot>  
<slot name="\_keyref" type="record"/>  
<slot name="\_score" type="string"></slot>  
<slot name="\_type" type="string"></slot>

```
</record>
<record id="6" template="HealthStatusRecord">
  <slot name="ScoreType" type="string">HealthStatusRecord</slot>
  <slot name="_score_ScoreType" type="string">CORRECT</slot>
  <slot name="source" type="string">C:\i2b2 eval\Subsets\Test\880.txt</slot>
  <slot name="_score_source" type="string">CORRECT</slot>
  <slot name="region" type="region">
    <region end="853" start="849">pain</region>
  </slot>
  <slot name="_score_region" type="string">CORRECT</slot>
  <slot name="rule" type="string">HealthStatusItemPkg/0</slot>
  <slot name="ConceptName" type="string">PAIN</slot>
  <slot name="_score_ConceptName" type="string">CORRECT</slot>
  <slot name="SemanticType" type="string">Sign or Symptom</slot>
  <slot name="BodyLocations" type="string"></slot>
  <slot name="_score_BodyLocations" type="string">MISSING</slot>
  <slot name="SeverityStrings" type="string"></slot>
  <slot name="UMLS_CUI" type="string">C0030193</slot>
  <slot name="DaysBeforeDeath" type="int">0</slot>
  <slot name="PAIN" type="string">Y</slot>
  <slot name="MaxPain" type="int">1</slot>
  <slot name="SeverityScale" type="int">1</slot>
  <slot name="_score_SeverityScale" type="string">CORRECT</slot>
  <slot name="polarity" type="string">POSITIVE</slot>
  <slot name="DocType" type="string"></slot>
```

```
<slot name="PatientID" type="int">0</slot>
<slot name="DateObject" type="record"/>
<slot name="enddate" type="date">
<date day="23" month="9" year="2000"/>
</slot>
<slot name="_score_enddate" type="string">CORRECT</slot>
<slot name="startdate" type="date">
<date day="23" month="9" year="2000"/>
</slot>
<slot name="_score_startdate" type="string">CORRECT</slot>
<slot name="Patient" type="string">PATIENT</slot>
<slot name="_score_Patient" type="string">CORRECT</slot>
<slot name="_keyref" type="record">
<record ref="5"/>
</slot>
<slot name="_score" type="string">INCORRECT</slot>
<slot name="_type" type="string"></slot>
</record>
</records>
</infStore>
<?xml version="1.0" encoding="UTF-8"?>
<infStore>
<records>
<record id="0" template="HealthStatusRecord">
<slot name="ScoreType" type="string">HealthStatusRecord</slot>
```

<slot name="\_score\_ScoreType" type="string">SPURIOUS</slot>  
<slot name="source" type="string">C:\i2b2 eval\Subsets\Test\892.txt</slot>  
<slot name="\_score\_source" type="string">SPURIOUS</slot>  
<slot name="region" type="region">  
<region end="1627" start="1621">Angina</region>  
</slot>  
<slot name="\_score\_region" type="string">SPURIOUS</slot>  
<slot name="rule" type="string">HealthStatusItemPkg/0</slot>  
<slot name="ConceptName" type="string">ANGINA PECTORIS</slot>  
<slot name="\_score\_ConceptName" type="string">SPURIOUS</slot>  
<slot name="SemanticType" type="string">Sign or Symptom</slot>  
<slot name="BodyLocations" type="string">CHEST</slot>  
<slot name="\_score\_BodyLocations" type="string">SPURIOUS</slot>  
<slot name="SeverityStrings" type="string"></slot>  
<slot name="UMLS\_CUI" type="string">C0002962</slot>  
<slot name="DaysBeforeDeath" type="int">0</slot>  
<slot name="PAIN" type="string">Y</slot>  
<slot name="MaxPain" type="int">1</slot>  
<slot name="SeverityScale" type="int">1</slot>  
<slot name="\_score\_SeverityScale" type="string">SPURIOUS</slot>  
<slot name="polarity" type="string">POSITIVE</slot>  
<slot name="DocType" type="string"></slot>  
<slot name="PatientID" type="int">0</slot>  
<slot name="DateObject" type="record"/>  
<slot name="enddate" type="date">

```
<date day="13" month="11" year="1996"/>
</slot>
<slot name="_score_enddate" type="string">SPURIOUS</slot>
<slot name="startdate" type="date">
<date day="13" month="11" year="1996"/>
</slot>
<slot name="_score_startdate" type="string">SPURIOUS</slot>
<slot name="Patient" type="string">PATIENT</slot>
<slot name="_score_Patient" type="string">SPURIOUS</slot>
<slot name="_keyref" type="record"/>
<slot name="_score" type="string">SPURIOUS</slot>
<slot name="_type" type="string"></slot>
</record>
</records>
</infStore>
<?xml version="1.0" encoding="UTF-8"?>
<infStore>
<records>
<record id="0" template="HealthStatusRecord">
<slot name="ScoreType" type="string">HealthStatusRecord</slot>
<slot name="_score_ScoreType" type="string"></slot>
<slot name="source" type="string">C:\i2b2 eval\Subsets\Test\900.txt</slot>
<slot name="_score_source" type="string"></slot>
<slot name="region" type="region">
<region end="4840" start="4836">pain</region>
```

</slot>  
<slot name="\_score\_region" type="string"></slot>  
<slot name="rule" type="string">HealthStatusItemPkg/0</slot>  
<slot name="ConceptName" type="string">PAIN</slot>  
<slot name="\_score\_ConceptName" type="string"></slot>  
<slot name="SemanticType" type="string">Sign or Symptom</slot>  
<slot name="BodyLocations" type="string">CHEST PAIN</slot>  
<slot name="\_score\_BodyLocations" type="string"></slot>  
<slot name="SeverityStrings" type="string"></slot>  
<slot name="UMLS\_CUI" type="string">C0030193</slot>  
<slot name="DaysBeforeDeath" type="int">0</slot>  
<slot name="PAIN" type="string">Y</slot>  
<slot name="MaxPain" type="int">1</slot>  
<slot name="SeverityScale" type="int">0</slot>  
<slot name="\_score\_SeverityScale" type="string"></slot>  
<slot name="polarity" type="string">POSITIVE</slot>  
<slot name="DocType" type="string"></slot>  
<slot name="PatientID" type="int">0</slot>  
<slot name="DateObject" type="record"/>  
<slot name="enddate" type="date">  
<date day="6" month="8" year="1998"/>  
</slot>  
<slot name="\_score\_enddate" type="string"></slot>  
<slot name="startdate" type="date">  
<date day="6" month="8" year="1998"/>

```
</slot>
<slot name="_score_startdate" type="string"></slot>
<slot name="Patient" type="string">PATIENT</slot>
<slot name="_score_Patient" type="string"></slot>
<slot name="_keyref" type="record"/>
<slot name="_score" type="string"></slot>
<slot name="_type" type="string"></slot>
</record>
<record id="1" template="HealthStatusRecord">
<slot name="ScoreType" type="string">HealthStatusRecord</slot>
<slot name="_score_ScoreType" type="string"></slot>
<slot name="source" type="string">C:\i2b2 eval\Subsets\Test\900.txt</slot>
<slot name="_score_source" type="string"></slot>
<slot name="region" type="region">
<region end="4840" start="4836">pain</region>
</slot>
<slot name="_score_region" type="string"></slot>
<slot name="rule" type="string">HealthStatusItemPkg/0</slot>
<slot name="ConceptName" type="string">PAIN</slot>
<slot name="_score_ConceptName" type="string"></slot>
<slot name="SemanticType" type="string">Sign or Symptom</slot>
<slot name="BodyLocations" type="string">CHEST PAIN</slot>
<slot name="_score_BodyLocations" type="string"></slot>
<slot name="SeverityStrings" type="string"></slot>
<slot name="UMLS_CUI" type="string">C0030193</slot>
```



```
<slot name="DaysBeforeDeath" type="int">0</slot>
<slot name="PAIN" type="string">Y</slot>
<slot name="MaxPain" type="int">1</slot>
<slot name="SeverityScale" type="int">0</slot>
<slot name="_score_SeverityScale" type="string"></slot>
<slot name="polarity" type="string">POSITIVE</slot>
<slot name="DocType" type="string"></slot>
<slot name="PatientID" type="int">0</slot>
<slot name="DateObject" type="record"/>
<slot name="enddate" type="date">
<date day="6" month="8" year="1998"/>
</slot>
<slot name="_score_enddate" type="string"></slot>
<slot name="startdate" type="date">
<date day="6" month="8" year="1998"/>
</slot>
<slot name="_score_startdate" type="string"></slot>
<slot name="Patient" type="string">PATIENT</slot>
<slot name="_score_Patient" type="string"></slot>
<slot name="_keyref" type="record"/>
<slot name="_score" type="string"></slot>
<slot name="_type" type="string"></slot>
</record>
<record id="2" template="HealthStatusRecord">
<slot name="ScoreType" type="string">HealthStatusRecord</slot>
```

<slot name="\_score\_ScoreType" type="string">CORRECT</slot>  
<slot name="source" type="string">C:\i2b2 eval\Subsets\Test\900.txt</slot>  
<slot name="\_score\_source" type="string">CORRECT</slot>  
<slot name="region" type="region">  
<region end="4840" start="4836">pain</region>  
</slot>  
<slot name="\_score\_region" type="string">CORRECT</slot>  
<slot name="rule" type="string">HealthStatusItemPkg/0</slot>  
<slot name="ConceptName" type="string">PAIN</slot>  
<slot name="\_score\_ConceptName" type="string">CORRECT</slot>  
<slot name="SemanticType" type="string">Sign or Symptom</slot>  
<slot name="BodyLocations" type="string"></slot>  
<slot name="\_score\_BodyLocations" type="string">MISSING</slot>  
<slot name="SeverityStrings" type="string"></slot>  
<slot name="UMLS\_CUI" type="string">C0030193</slot>  
<slot name="DaysBeforeDeath" type="int">0</slot>  
<slot name="PAIN" type="string">Y</slot>  
<slot name="MaxPain" type="int">1</slot>  
<slot name="SeverityScale" type="int">1</slot>  
<slot name="\_score\_SeverityScale" type="string">INCORRECT</slot>  
<slot name="polarity" type="string">POSITIVE</slot>  
<slot name="DocType" type="string"></slot>  
<slot name="PatientID" type="int">0</slot>  
<slot name="DateObject" type="record"/>  
<slot name="enddate" type="date">

```
<date day="5" month="8" year="1998"/>
</slot>
<slot name="_score_enddate" type="string">INCORRECT</slot>
<slot name="startdate" type="date">
<date day="5" month="8" year="1998"/>
</slot>
<slot name="_score_startdate" type="string">INCORRECT</slot>
<slot name="Patient" type="string">PATIENT</slot>
<slot name="_score_Patient" type="string">CORRECT</slot>
<slot name="_keyref" type="record">
<record ref="1"/>
</slot>
<slot name="_score" type="string">INCORRECT</slot>
<slot name="_type" type="string"></slot>
</record>
<record id="3" template="HealthStatusRecord">
<slot name="ScoreType" type="string">HealthStatusRecord</slot>
<slot name="_score_ScoreType" type="string"></slot>
<slot name="source" type="string">C:\i2b2 eval\Subsets\Test\900.txt</slot>
<slot name="_score_source" type="string"></slot>
<slot name="region" type="region">
<region end="1673" start="1663">chest pain</region>
</slot>
<slot name="_score_region" type="string"></slot>
<slot name="rule" type="string">HealthStatusItemPkg/0</slot>
```

<slot name="ConceptName" type="string">CHEST PAIN UNSPECIFIED</slot>  
<slot name="\_score\_ConceptName" type="string"></slot>  
<slot name="SemanticType" type="string">Sign or Symptom</slot>  
<slot name="BodyLocations" type="string">CHEST</slot>  
<slot name="\_score\_BodyLocations" type="string"></slot>  
<slot name="SeverityStrings" type="string"></slot>  
<slot name="UMLS\_CUI" type="string">C1535568</slot>  
<slot name="DaysBeforeDeath" type="int">0</slot>  
<slot name="PAIN" type="string">Y</slot>  
<slot name="MaxPain" type="int">1</slot>  
<slot name="SeverityScale" type="int">1</slot>  
<slot name="\_score\_SeverityScale" type="string"></slot>  
<slot name="polarity" type="string">POSITIVE</slot>  
<slot name="DocType" type="string"></slot>  
<slot name="PatientID" type="int">0</slot>  
<slot name="DateObject" type="record"/>  
<slot name="enddate" type="date">  
<date day="5" month="8" year="1998"/>  
</slot>  
<slot name="\_score\_enddate" type="string"></slot>  
<slot name="startdate" type="date">  
<date day="5" month="8" year="1998"/>  
</slot>  
<slot name="\_score\_startdate" type="string"></slot>  
<slot name="Patient" type="string">PATIENT</slot>

```
<slot name="_score_Patient" type="string"></slot>
<slot name="_keyref" type="record"/>
<slot name="_score" type="string"></slot>
<slot name="_type" type="string"></slot>
</record>
<record id="4" template="HealthStatusRecord">
<slot name="ScoreType" type="string">HealthStatusRecord</slot>
<slot name="_score_ScoreType" type="string">CORRECT</slot>
<slot name="source" type="string">C:\i2b2 eval\Subsets\Test\900.txt</slot>
<slot name="_score_source" type="string">CORRECT</slot>
<slot name="region" type="region">
<region end="1673" start="1663">chest pain</region>
</slot>
<slot name="_score_region" type="string">CORRECT</slot>
<slot name="rule" type="string">HealthStatusItemPkg/0</slot>
<slot name="ConceptName" type="string">CHEST PAIN</slot>
<slot name="_score_ConceptName" type="string">INCORRECT</slot>
<slot name="SemanticType" type="string">Sign or Symptom</slot>
<slot name="BodyLocations" type="string">CHEST</slot>
<slot name="_score_BodyLocations" type="string">CORRECT</slot>
<slot name="SeverityStrings" type="string"></slot>
<slot name="UMLS_CUI" type="string">C0008031</slot>
<slot name="DaysBeforeDeath" type="int">0</slot>
<slot name="PAIN" type="string">Y</slot>
<slot name="MaxPain" type="int">1</slot>
```

```
<slot name="SeverityScale" type="int">1</slot>
<slot name="_score_SeverityScale" type="string">CORRECT</slot>
<slot name="polarity" type="string">POSITIVE</slot>
<slot name="DocType" type="string"></slot>
<slot name="PatientID" type="int">0</slot>
<slot name="DateObject" type="record"/>
<slot name="enddate" type="date">
<date day="5" month="8" year="1998"/>
</slot>
<slot name="_score_enddate" type="string">CORRECT</slot>
<slot name="startdate" type="date">
<date day="5" month="8" year="1998"/>
</slot>
<slot name="_score_startdate" type="string">CORRECT</slot>
<slot name="Patient" type="string">PATIENT</slot>
<slot name="_score_Patient" type="string">CORRECT</slot>
<slot name="_keyref" type="record">
<record ref="3"/>
</slot>
<slot name="_score" type="string">INCORRECT</slot>
<slot name="_type" type="string"></slot>
</record>
<record id="5" template="HealthStatusRecord">
<slot name="ScoreType" type="string">HealthStatusRecord</slot>
<slot name="_score_ScoreType" type="string"></slot>
```

<slot name="source" type="string">C:\i2b2 eval\Subsets\Test\900.txt</slot>  
<slot name="\_score\_source" type="string"></slot>  
<slot name="region" type="region">  
<region end="1355" start="1351">pain</region>  
</slot>  
<slot name="\_score\_region" type="string"></slot>  
<slot name="rule" type="string">HealthStatusItemPkg/0</slot>  
<slot name="ConceptName" type="string">PAIN</slot>  
<slot name="\_score\_ConceptName" type="string"></slot>  
<slot name="SemanticType" type="string">Sign or Symptom</slot>  
<slot name="BodyLocations" type="string">CHEST STRUCTURE</slot>  
<slot name="\_score\_BodyLocations" type="string"></slot>  
<slot name="SeverityStrings" type="string">INTERMITTENT</slot>  
<slot name="UMLS\_CUI" type="string">C0030193</slot>  
<slot name="DaysBeforeDeath" type="int">0</slot>  
<slot name="PAIN" type="string">Y</slot>  
<slot name="MaxPain" type="int">1</slot>  
<slot name="SeverityScale" type="int">1</slot>  
<slot name="\_score\_SeverityScale" type="string"></slot>  
<slot name="polarity" type="string">POSITIVE</slot>  
<slot name="DocType" type="string"></slot>  
<slot name="PatientID" type="int">0</slot>  
<slot name="DateObject" type="record"/>  
<slot name="enddate" type="date">  
<date day="5" month="8" year="1998"/>

```
</slot>
<slot name="_score_enddate" type="string"></slot>
<slot name="startdate" type="date">
<date day="5" month="8" year="1998"/>
</slot>
<slot name="_score_startdate" type="string"></slot>
<slot name="Patient" type="string">PATIENT</slot>
<slot name="_score_Patient" type="string"></slot>
<slot name="_keyref" type="record"/>
<slot name="_score" type="string"></slot>
<slot name="_type" type="string"></slot>
</record>
<record id="6" template="HealthStatusRecord">
<slot name="ScoreType" type="string">HealthStatusRecord</slot>
<slot name="_score_ScoreType" type="string">CORRECT</slot>
<slot name="source" type="string">C:\i2b2 eval\Subsets\Test\900.txt</slot>
<slot name="_score_source" type="string">CORRECT</slot>
<slot name="region" type="region">
<region end="1355" start="1351">pain</region>
</slot>
<slot name="_score_region" type="string">CORRECT</slot>
<slot name="rule" type="string">HealthStatusItemPkg/0</slot>
<slot name="ConceptName" type="string">PAIN</slot>
<slot name="_score_ConceptName" type="string">CORRECT</slot>
<slot name="SemanticType" type="string">Sign or Symptom</slot>
```



<slot name="BodyLocations" type="string"></slot>  
<slot name="\_score\_BodyLocations" type="string">MISSING</slot>  
<slot name="SeverityStrings" type="string">INTERMITTENT</slot>  
<slot name="UMLS\_CUI" type="string">C0030193</slot>  
<slot name="DaysBeforeDeath" type="int">0</slot>  
<slot name="PAIN" type="string">Y</slot>  
<slot name="MaxPain" type="int">1</slot>  
<slot name="SeverityScale" type="int">1</slot>  
<slot name="\_score\_SeverityScale" type="string">CORRECT</slot>  
<slot name="polarity" type="string">POSITIVE</slot>  
<slot name="DocType" type="string"></slot>  
<slot name="PatientID" type="int">0</slot>  
<slot name="DateObject" type="record"/>  
<slot name="enddate" type="date">  
<date day="5" month="8" year="1998"/>  
</slot>  
<slot name="\_score\_enddate" type="string">CORRECT</slot>  
<slot name="startdate" type="date">  
<date day="5" month="8" year="1998"/>  
</slot>  
<slot name="\_score\_startdate" type="string">CORRECT</slot>  
<slot name="Patient" type="string">PATIENT</slot>  
<slot name="\_score\_Patient" type="string">CORRECT</slot>  
<slot name="\_keyref" type="record">  
<record ref="5"/>

```
</slot>
<slot name="_score" type="string">INCORRECT</slot>
<slot name="_type" type="string"></slot>
</record>
<record id="7" template="HealthStatusRecord">
<slot name="ScoreType" type="string">HealthStatusRecord</slot>
<slot name="_score_ScoreType" type="string"></slot>
<slot name="source" type="string">C:\i2b2 eval\Subsets\Test\900.txt</slot>
<slot name="_score_source" type="string"></slot>
<slot name="region" type="region">
<region end="1586" start="1582">pain</region>
</slot>
<slot name="_score_region" type="string"></slot>
<slot name="rule" type="string">HealthStatusItemPkg/0</slot>
<slot name="ConceptName" type="string">PAIN</slot>
<slot name="_score_ConceptName" type="string"></slot>
<slot name="SemanticType" type="string">Sign or Symptom</slot>
<slot name="BodyLocations" type="string">RIGHT SIDED CHEST PAIN</slot>
<slot name="_score_BodyLocations" type="string"></slot>
<slot name="SeverityStrings" type="string"></slot>
<slot name="UMLS_CUI" type="string">C0030193</slot>
<slot name="DaysBeforeDeath" type="int">0</slot>
<slot name="PAIN" type="string">Y</slot>
<slot name="MaxPain" type="int">1</slot>
<slot name="SeverityScale" type="int">0</slot>
```

```
<slot name="_score_SeverityScale" type="string"></slot>
<slot name="polarity" type="string">POSITIVE</slot>
<slot name="DocType" type="string"></slot>
<slot name="PatientID" type="int">0</slot>
<slot name="DateObject" type="record"/>
<slot name="enddate" type="date">
<date day="5" month="8" year="1998"/>
</slot>
<slot name="_score_enddate" type="string"></slot>
<slot name="startdate" type="date">
<date day="5" month="8" year="1998"/>
</slot>
<slot name="_score_startdate" type="string"></slot>
<slot name="Patient" type="string">PATIENT</slot>
<slot name="_score_Patient" type="string"></slot>
<slot name="_keyref" type="record"/>
<slot name="_score" type="string"></slot>
<slot name="_type" type="string"></slot>
</record>
<record id="8" template="HealthStatusRecord">
<slot name="ScoreType" type="string">HealthStatusRecord</slot>
<slot name="_score_ScoreType" type="string">CORRECT</slot>
<slot name="source" type="string">C:\i2b2 eval\Subsets\Test\900.txt</slot>
<slot name="_score_source" type="string">CORRECT</slot>
<slot name="region" type="region">
```

<region end="1586" start="1582">pain</region>  
</slot>  
<slot name="\_score\_region" type="string">CORRECT</slot>  
<slot name="rule" type="string">HealthStatusItemPkg/0</slot>  
<slot name="ConceptName" type="string">PAIN</slot>  
<slot name="\_score\_ConceptName" type="string">CORRECT</slot>  
<slot name="SemanticType" type="string">Sign or Symptom</slot>  
<slot name="BodyLocations" type="string"></slot>  
<slot name="\_score\_BodyLocations" type="string">MISSING</slot>  
<slot name="SeverityStrings" type="string"></slot>  
<slot name="UMLS\_CUI" type="string">C0030193</slot>  
<slot name="DaysBeforeDeath" type="int">0</slot>  
<slot name="PAIN" type="string">Y</slot>  
<slot name="MaxPain" type="int">1</slot>  
<slot name="SeverityScale" type="int">1</slot>  
<slot name="\_score\_SeverityScale" type="string">INCORRECT</slot>  
<slot name="polarity" type="string">POSITIVE</slot>  
<slot name="DocType" type="string"></slot>  
<slot name="PatientID" type="int">0</slot>  
<slot name="DateObject" type="record"/>  
<slot name="enddate" type="date">  
<date day="5" month="8" year="1998"/>  
</slot>  
<slot name="\_score\_enddate" type="string">CORRECT</slot>  
<slot name="startdate" type="date">

```
<date day="5" month="8" year="1998"/>
</slot>
<slot name="_score_startdate" type="string">CORRECT</slot>
<slot name="Patient" type="string">PATIENT</slot>
<slot name="_score_Patient" type="string">CORRECT</slot>
<slot name="_keyref" type="record">
<record ref="7"/>
</slot>
<slot name="_score" type="string">INCORRECT</slot>
<slot name="_type" type="string"></slot>
</record>
<record id="9" template="HealthStatusRecord">
<slot name="ScoreType" type="string">HealthStatusRecord</slot>
<slot name="_score_ScoreType" type="string"></slot>
<slot name="source" type="string">C:\i2b2 eval\Subsets\Test\900.txt</slot>
<slot name="_score_source" type="string"></slot>
<slot name="region" type="region">
<region end="3640" start="3630">tenderness</region>
</slot>
<slot name="_score_region" type="string"></slot>
<slot name="rule" type="string">HealthStatusItemPkg/0</slot>
<slot name="ConceptName" type="string">TENDERNESS</slot>
<slot name="_score_ConceptName" type="string"></slot>
<slot name="SemanticType" type="string">Sign or Symptom</slot>
<slot name="BodyLocations" type="string">ABDOMEN</slot>
```

<slot name="\_score\_BodyLocations" type="string"></slot>  
<slot name="SeverityStrings" type="string">NO</slot>  
<slot name="UMLS\_CUI" type="string">C0234233</slot>  
<slot name="DaysBeforeDeath" type="int">0</slot>  
<slot name="PAIN" type="string">Y</slot>  
<slot name="MaxPain" type="int">1</slot>  
<slot name="SeverityScale" type="int">0</slot>  
<slot name="\_score\_SeverityScale" type="string"></slot>  
<slot name="polarity" type="string">POSITIVE</slot>  
<slot name="DocType" type="string"></slot>  
<slot name="PatientID" type="int">0</slot>  
<slot name="DateObject" type="record"/>  
<slot name="enddate" type="date">  
<date day="5" month="8" year="1998"/>  
</slot>  
<slot name="\_score\_enddate" type="string"></slot>  
<slot name="startdate" type="date">  
<date day="5" month="8" year="1998"/>  
</slot>  
<slot name="\_score\_startdate" type="string"></slot>  
<slot name="Patient" type="string">PATIENT</slot>  
<slot name="\_score\_Patient" type="string"></slot>  
<slot name="\_keyref" type="record"/>  
<slot name="\_score" type="string"></slot>  
<slot name="\_type" type="string"></slot>

```
</record>
<record id="10" template="HealthStatusRecord">
  <slot name="ScoreType" type="string">HealthStatusRecord</slot>
  <slot name="_score_ScoreType" type="string">CORRECT</slot>
  <slot name="source" type="string">C:\i2b2 eval\Subsets\Test\900.txt</slot>
  <slot name="_score_source" type="string">CORRECT</slot>
  <slot name="region" type="region">
    <region end="3640" start="3630">tenderness</region>
  </slot>
  <slot name="_score_region" type="string">CORRECT</slot>
  <slot name="rule" type="string">HealthStatusItemPkg/0</slot>
  <slot name="ConceptName" type="string">TENDERNESS</slot>
  <slot name="_score_ConceptName" type="string">CORRECT</slot>
  <slot name="SemanticType" type="string">Sign or Symptom</slot>
  <slot name="BodyLocations" type="string"></slot>
  <slot name="_score_BodyLocations" type="string">MISSING</slot>
  <slot name="SeverityStrings" type="string">NO</slot>
  <slot name="UMLS_CUI" type="string">C0234233</slot>
  <slot name="DaysBeforeDeath" type="int">0</slot>
  <slot name="PAIN" type="string">Y</slot>
  <slot name="MaxPain" type="int">1</slot>
  <slot name="SeverityScale" type="int">0</slot>
  <slot name="_score_SeverityScale" type="string">CORRECT</slot>
  <slot name="polarity" type="string">POSITIVE</slot>
  <slot name="DocType" type="string"></slot>
```

```
<slot name="PatientID" type="int">0</slot>
<slot name="DateObject" type="record"/>
<slot name="enddate" type="date">
<date day="5" month="8" year="1998"/>
</slot>
<slot name="_score_enddate" type="string">CORRECT</slot>
<slot name="startdate" type="date">
<date day="5" month="8" year="1998"/>
</slot>
<slot name="_score_startdate" type="string">CORRECT</slot>
<slot name="Patient" type="string">PATIENT</slot>
<slot name="_score_Patient" type="string">CORRECT</slot>
<slot name="_keyref" type="record">
<record ref="9"/>
</slot>
<slot name="_score" type="string">INCORRECT</slot>
<slot name="_type" type="string"></slot>
</record>
<record id="11" template="HealthStatusRecord">
<slot name="ScoreType" type="string">HealthStatusRecord</slot>
<slot name="_score_ScoreType" type="string">CORRECT</slot>
<slot name="source" type="string">C:\i2b2 eval\Subsets\Test\900.txt</slot>
<slot name="_score_source" type="string">CORRECT</slot>
<slot name="region" type="region">
<region end="3712" start="3700">claudication</region>
```



</slot>

<slot name="\_score\_region" type="string">CORRECT</slot>

<slot name="rule" type="string">HealthStatusItemPkg/0</slot>

<slot name="ConceptName" type="string">LOWER EXTREMITY EXERTIONAL PAIN</slot>

<slot name="\_score\_ConceptName" type="string">CORRECT</slot>

<slot name="SemanticType" type="string">Sign or Symptom</slot>

<slot name="BodyLocations" type="string">LEGS</slot>

<slot name="\_score\_BodyLocations" type="string">CORRECT</slot>

<slot name="SeverityStrings" type="string">WITHOUT</slot>

<slot name="UMLS\_CUI" type="string">C1456822</slot>

<slot name="DaysBeforeDeath" type="int">0</slot>

<slot name="PAIN" type="string">Y</slot>

<slot name="MaxPain" type="int">1</slot>

<slot name="SeverityScale" type="int">0</slot>

<slot name="\_score\_SeverityScale" type="string">CORRECT</slot>

<slot name="polarity" type="string">POSITIVE</slot>

<slot name="DocType" type="string"></slot>

<slot name="PatientID" type="int">0</slot>

<slot name="DateObject" type="record"/>

<slot name="enddate" type="date">

<date day="5" month="8" year="1998"/>

</slot>

<slot name="\_score\_enddate" type="string">CORRECT</slot>

<slot name="startdate" type="date">

```
<date day="5" month="8" year="1998"/>
</slot>
<slot name="_score_startdate" type="string">CORRECT</slot>
<slot name="Patient" type="string">PATIENT</slot>
<slot name="_score_Patient" type="string">CORRECT</slot>
<slot name="_keyref" type="record"/>
<slot name="_score" type="string">CORRECT</slot>
<slot name="_type" type="string"></slot>
</record>
<record id="12" template="HealthStatusRecord">
<slot name="ScoreType" type="string">HealthStatusRecord</slot>
<slot name="_score_ScoreType" type="string"></slot>
<slot name="source" type="string">C:\i2b2 eval\Subsets\Test\900.txt</slot>
<slot name="_score_source" type="string"></slot>
<slot name="region" type="region">
<region end="1023" start="1001">right sided chest pain</region>
</slot>
<slot name="_score_region" type="string"></slot>
<slot name="rule" type="string">HealthStatusItemPkg/0</slot>
<slot name="ConceptName" type="string">RIGHT SIDED CHEST PAIN</slot>
<slot name="_score_ConceptName" type="string"></slot>
<slot name="SemanticType" type="string">Sign or Symptom</slot>
<slot name="BodyLocations" type="string">CHEST STRUCTURE</slot>
<slot name="_score_BodyLocations" type="string"></slot>
<slot name="SeverityStrings" type="string">5</slot>
```

```
<slot name="UMLS_CUI" type="string">C0563275</slot>
<slot name="DaysBeforeDeath" type="int">0</slot>
<slot name="PAIN" type="string">Y</slot>
<slot name="MaxPain" type="int">1</slot>
<slot name="SeverityScale" type="int">1</slot>
<slot name="_score_SeverityScale" type="string"></slot>
<slot name="polarity" type="string">POSITIVE</slot>
<slot name="DocType" type="string"></slot>
<slot name="PatientID" type="int">0</slot>
<slot name="DateObject" type="record"/>
<slot name="enddate" type="date">
<date day="5" month="8" year="1998"/>
</slot>
<slot name="_score_enddate" type="string"></slot>
<slot name="startdate" type="date">
<date day="5" month="8" year="1998"/>
</slot>
<slot name="_score_startdate" type="string"></slot>
<slot name="Patient" type="string">PATIENT</slot>
<slot name="_score_Patient" type="string"></slot>
<slot name="_keyref" type="record"/>
<slot name="_score" type="string"></slot>
<slot name="_type" type="string"></slot>
</record>
<record id="13" template="HealthStatusRecord">
```

<slot name="ScoreType" type="string">HealthStatusRecord</slot>  
<slot name="\_score\_ScoreType" type="string">CORRECT</slot>  
<slot name="source" type="string">C:\i2b2 eval\Subsets\Test\900.txt</slot>  
<slot name="\_score\_source" type="string">CORRECT</slot>  
<slot name="region" type="region">  
<region end="3471" start="3440">costovertebral angle tenderness</region>  
</slot>  
<slot name="\_score\_region" type="string">CORRECT</slot>  
<slot name="rule" type="string">HealthStatusItemPkg/0</slot>  
<slot name="ConceptName" type="string">RENAL ANGLE TENDERNESS</slot>  
<slot name="\_score\_ConceptName" type="string">CORRECT</slot>  
<slot name="SemanticType" type="string">Sign or Symptom</slot>  
<slot name="BodyLocations" type="string">COSTOVERTEBRAL ANGLE</slot>  
<slot name="\_score\_BodyLocations" type="string">CORRECT</slot>  
<slot name="SeverityStrings" type="string">NO</slot>  
<slot name="UMLS\_CUI" type="string">C0235634</slot>  
<slot name="DaysBeforeDeath" type="int">0</slot>  
<slot name="PAIN" type="string">Y</slot>  
<slot name="MaxPain" type="int">1</slot>  
<slot name="SeverityScale" type="int">0</slot>  
<slot name="\_score\_SeverityScale" type="string">CORRECT</slot>  
<slot name="polarity" type="string">POSITIVE</slot>  
<slot name="DocType" type="string"></slot>  
<slot name="PatientID" type="int">0</slot>  
<slot name="DateObject" type="record"/>

```
<slot name="enddate" type="date">
<date day="5" month="8" year="1998"/>
</slot>
<slot name="_score_enddate" type="string">CORRECT</slot>
<slot name="startdate" type="date">
<date day="5" month="8" year="1998"/>
</slot>
<slot name="_score_startdate" type="string">CORRECT</slot>
<slot name="Patient" type="string">PATIENT</slot>
<slot name="_score_Patient" type="string">CORRECT</slot>
<slot name="_keyref" type="record"/>
<slot name="_score" type="string">CORRECT</slot>
<slot name="_type" type="string"></slot>
</record>
<record id="14" template="HealthStatusRecord">
<slot name="ScoreType" type="string">HealthStatusRecord</slot>
<slot name="_score_ScoreType" type="string"></slot>
<slot name="source" type="string">C:\i2b2 eval\Subsets\Test\900.txt</slot>
<slot name="_score_source" type="string"></slot>
<slot name="region" type="region">
<region end="1673" start="1663">chest pain</region>
</slot>
<slot name="_score_region" type="string"></slot>
<slot name="rule" type="string">HealthStatusItemPkg/0</slot>
<slot name="ConceptName" type="string">CHEST PAIN UNSPECIFIED</slot>
```

<slot name="\_score\_ConceptName" type="string"></slot>  
<slot name="SemanticType" type="string">Sign or Symptom</slot>  
<slot name="BodyLocations" type="string">CHEST</slot>  
<slot name="\_score\_BodyLocations" type="string"></slot>  
<slot name="SeverityStrings" type="string"></slot>  
<slot name="UMLS\_CUI" type="string">C1535568</slot>  
<slot name="DaysBeforeDeath" type="int">0</slot>  
<slot name="PAIN" type="string">Y</slot>  
<slot name="MaxPain" type="int">1</slot>  
<slot name="SeverityScale" type="int">1</slot>  
<slot name="\_score\_SeverityScale" type="string"></slot>  
<slot name="polarity" type="string">POSITIVE</slot>  
<slot name="DocType" type="string"></slot>  
<slot name="PatientID" type="int">0</slot>  
<slot name="DateObject" type="record"/>  
<slot name="enddate" type="date">  
<date day="5" month="8" year="1998"/>  
</slot>  
<slot name="\_score\_enddate" type="string"></slot>  
<slot name="startdate" type="date">  
<date day="5" month="8" year="1998"/>  
</slot>  
<slot name="\_score\_startdate" type="string"></slot>  
<slot name="Patient" type="string">PATIENT</slot>  
<slot name="\_score\_Patient" type="string"></slot>

```
<slot name="_keyref" type="record"/>
<slot name="_score" type="string"></slot>
<slot name="_type" type="string"></slot>
</record>
<record id="15" template="HealthStatusRecord">
<slot name="ScoreType" type="string">HealthStatusRecord</slot>
<slot name="_score_ScoreType" type="string"></slot>
<slot name="source" type="string">C:\i2b2 eval\Subsets\Test\900.txt</slot>
<slot name="_score_source" type="string"></slot>
<slot name="region" type="region">
<region end="1023" start="1001">right sided chest pain</region>
</slot>
<slot name="_score_region" type="string"></slot>
<slot name="rule" type="string">HealthStatusItemPkg/0</slot>
<slot name="ConceptName" type="string">RIGHT SIDED CHEST PAIN</slot>
<slot name="_score_ConceptName" type="string"></slot>
<slot name="SemanticType" type="string">Sign or Symptom</slot>
<slot name="BodyLocations" type="string">CHEST STRUCTURE</slot>
<slot name="_score_BodyLocations" type="string"></slot>
<slot name="SeverityStrings" type="string">5</slot>
<slot name="UMLS_CUI" type="string">C0563275</slot>
<slot name="DaysBeforeDeath" type="int">0</slot>
<slot name="PAIN" type="string">Y</slot>
<slot name="MaxPain" type="int">1</slot>
<slot name="SeverityScale" type="int">1</slot>
```

```
<slot name="_score_SeverityScale" type="string"></slot>
<slot name="polarity" type="string">POSITIVE</slot>
<slot name="DocType" type="string"></slot>
<slot name="PatientID" type="int">0</slot>
<slot name="DateObject" type="record"/>
<slot name="enddate" type="date">
<date day="5" month="8" year="1998"/>
</slot>
<slot name="_score_enddate" type="string"></slot>
<slot name="startdate" type="date">
<date day="5" month="8" year="1998"/>
</slot>
<slot name="_score_startdate" type="string"></slot>
<slot name="Patient" type="string">PATIENT</slot>
<slot name="_score_Patient" type="string"></slot>
<slot name="_keyref" type="record"/>
<slot name="_score" type="string"></slot>
<slot name="_type" type="string"></slot>
</record>
<record id="16" template="HealthStatusRecord">
<slot name="ScoreType" type="string">HealthStatusRecord</slot>
<slot name="_score_ScoreType" type="string">CORRECT</slot>
<slot name="source" type="string">C:\i2b2 eval\Subsets\Test\900.txt</slot>
<slot name="_score_source" type="string">CORRECT</slot>
<slot name="region" type="region">
```



<region end="1023" start="1001">right sided chest pain</region>  
</slot>  
<slot name="\_score\_region" type="string">CORRECT</slot>  
<slot name="rule" type="string">HealthStatusItemPkg/0</slot>  
<slot name="ConceptName" type="string">RIGHT SIDED CHEST PAIN</slot>  
<slot name="\_score\_ConceptName" type="string">CORRECT</slot>  
<slot name="SemanticType" type="string">Sign or Symptom</slot>  
<slot name="BodyLocations" type="string"></slot>  
<slot name="\_score\_BodyLocations" type="string">MISSING</slot>  
<slot name="SeverityStrings" type="string">5</slot>  
<slot name="UMLS\_CUI" type="string">C0563275</slot>  
<slot name="DaysBeforeDeath" type="int">0</slot>  
<slot name="PAIN" type="string">Y</slot>  
<slot name="MaxPain" type="int">1</slot>  
<slot name="SeverityScale" type="int">1</slot>  
<slot name="\_score\_SeverityScale" type="string">CORRECT</slot>  
<slot name="polarity" type="string">POSITIVE</slot>  
<slot name="DocType" type="string"></slot>  
<slot name="PatientID" type="int">0</slot>  
<slot name="DateObject" type="record"/>  
<slot name="enddate" type="date">  
<date day="5" month="8" year="1998"/>  
</slot>  
<slot name="\_score\_enddate" type="string">CORRECT</slot>  
<slot name="startdate" type="date">

```
<date day="5" month="8" year="1998"/>
</slot>
<slot name="_score_startdate" type="string">CORRECT</slot>
<slot name="Patient" type="string">PATIENT</slot>
<slot name="_score_Patient" type="string">CORRECT</slot>
<slot name="_keyref" type="record">
<record ref="15"/>
</slot>
<slot name="_score" type="string">INCORRECT</slot>
<slot name="_type" type="string"></slot>
</record>
<record id="17" template="HealthStatusRecord">
<slot name="ScoreType" type="string">HealthStatusRecord</slot>
<slot name="_score_ScoreType" type="string"></slot>
<slot name="source" type="string">C:\i2b2 eval\Subsets\Test\900.txt</slot>
<slot name="_score_source" type="string"></slot>
<slot name="region" type="region">
<region end="629" start="607">Right sided chest pain</region>
</slot>
<slot name="_score_region" type="string"></slot>
<slot name="rule" type="string">HealthStatusItemPkg/0</slot>
<slot name="ConceptName" type="string">RIGHT SIDED CHEST PAIN</slot>
<slot name="_score_ConceptName" type="string"></slot>
<slot name="SemanticType" type="string">Sign or Symptom</slot>
<slot name="BodyLocations" type="string">CHEST STRUCTURE</slot>
```

<slot name="\_score\_BodyLocations" type="string"></slot>  
<slot name="SeverityStrings" type="string"></slot>  
<slot name="UMLS\_CUI" type="string">C0563275</slot>  
<slot name="DaysBeforeDeath" type="int">0</slot>  
<slot name="PAIN" type="string">Y</slot>  
<slot name="MaxPain" type="int">1</slot>  
<slot name="SeverityScale" type="int">1</slot>  
<slot name="\_score\_SeverityScale" type="string"></slot>  
<slot name="polarity" type="string">POSITIVE</slot>  
<slot name="DocType" type="string"></slot>  
<slot name="PatientID" type="int">0</slot>  
<slot name="DateObject" type="record"/>  
<slot name="enddate" type="date">  
<date day="5" month="8" year="1998"/>  
</slot>  
<slot name="\_score\_enddate" type="string"></slot>  
<slot name="startdate" type="date">  
<date day="5" month="8" year="1998"/>  
</slot>  
<slot name="\_score\_startdate" type="string"></slot>  
<slot name="Patient" type="string">PATIENT</slot>  
<slot name="\_score\_Patient" type="string"></slot>  
<slot name="\_keyref" type="record"/>  
<slot name="\_score" type="string"></slot>  
<slot name="\_type" type="string"></slot>

```
</record>
<record id="18" template="HealthStatusRecord">
<slot name="ScoreType" type="string">HealthStatusRecord</slot>
<slot name="_score_ScoreType" type="string">CORRECT</slot>
<slot name="source" type="string">C:\i2b2 eval\Subsets\Test\900.txt</slot>
<slot name="_score_source" type="string">CORRECT</slot>
<slot name="region" type="region">
<region end="629" start="607">Right sided chest pain</region>
</slot>
<slot name="_score_region" type="string">CORRECT</slot>
<slot name="rule" type="string">HealthStatusItemPkg/0</slot>
<slot name="ConceptName" type="string">RIGHT SIDED CHEST PAIN</slot>
<slot name="_score_ConceptName" type="string">CORRECT</slot>
<slot name="SemanticType" type="string">Sign or Symptom</slot>
<slot name="BodyLocations" type="string"></slot>
<slot name="_score_BodyLocations" type="string">MISSING</slot>
<slot name="SeverityStrings" type="string"></slot>
<slot name="UMLS_CUI" type="string">C0563275</slot>
<slot name="DaysBeforeDeath" type="int">0</slot>
<slot name="PAIN" type="string">Y</slot>
<slot name="MaxPain" type="int">1</slot>
<slot name="SeverityScale" type="int">1</slot>
<slot name="_score_SeverityScale" type="string">CORRECT</slot>
<slot name="polarity" type="string">POSITIVE</slot>
<slot name="DocType" type="string"></slot>
```

```
<slot name="PatientID" type="int">0</slot>
<slot name="DateObject" type="record"/>
<slot name="enddate" type="date">
<date day="5" month="8" year="1998"/>
</slot>
<slot name="_score_enddate" type="string">CORRECT</slot>
<slot name="startdate" type="date">
<date day="5" month="8" year="1998"/>
</slot>
<slot name="_score_startdate" type="string">CORRECT</slot>
<slot name="Patient" type="string">PATIENT</slot>
<slot name="_score_Patient" type="string">CORRECT</slot>
<slot name="_keyref" type="record">
<record ref="17"/>
</slot>
<slot name="_score" type="string">INCORRECT</slot>
<slot name="_type" type="string"></slot>
</record>
<record id="19" template="HealthStatusRecord">
<slot name="ScoreType" type="string">HealthStatusRecord</slot>
<slot name="_score_ScoreType" type="string"></slot>
<slot name="source" type="string">C:\i2b2 eval\Subsets\Test\900.txt</slot>
<slot name="_score_source" type="string"></slot>
<slot name="region" type="region">
<region end="629" start="607">Right sided chest pain</region>
```

</slot>  
<slot name="\_score\_region" type="string"></slot>  
<slot name="rule" type="string">HealthStatusItemPkg/0</slot>  
<slot name="ConceptName" type="string">RIGHT SIDED CHEST PAIN</slot>  
<slot name="\_score\_ConceptName" type="string"></slot>  
<slot name="SemanticType" type="string">Sign or Symptom</slot>  
<slot name="BodyLocations" type="string">CHEST STRUCTURE</slot>  
<slot name="\_score\_BodyLocations" type="string"></slot>  
<slot name="SeverityStrings" type="string"></slot>  
<slot name="UMLS\_CUI" type="string">C0563275</slot>  
<slot name="DaysBeforeDeath" type="int">0</slot>  
<slot name="PAIN" type="string">Y</slot>  
<slot name="MaxPain" type="int">1</slot>  
<slot name="SeverityScale" type="int">1</slot>  
<slot name="\_score\_SeverityScale" type="string"></slot>  
<slot name="polarity" type="string">POSITIVE</slot>  
<slot name="DocType" type="string"></slot>  
<slot name="PatientID" type="int">0</slot>  
<slot name="DateObject" type="record"/>  
<slot name="enddate" type="date">  
<date day="5" month="8" year="1998"/>  
</slot>  
<slot name="\_score\_enddate" type="string"></slot>  
<slot name="startdate" type="date">  
<date day="5" month="8" year="1998"/>

```
</slot>
<slot name="_score_startdate" type="string"></slot>
<slot name="Patient" type="string">PATIENT</slot>
<slot name="_score_Patient" type="string"></slot>
<slot name="_keyref" type="record"/>
<slot name="_score" type="string"></slot>
<slot name="_type" type="string"></slot>
</record>
<record id="20" template="HealthStatusRecord">
<slot name="ScoreType" type="string">HealthStatusRecord</slot>
<slot name="_score_ScoreType" type="string"></slot>
<slot name="source" type="string">C:\i2b2 eval\Subsets\Test\900.txt</slot>
<slot name="_score_source" type="string"></slot>
<slot name="region" type="region">
<region end="1355" start="1351">pain</region>
</slot>
<slot name="_score_region" type="string"></slot>
<slot name="rule" type="string">HealthStatusItemPkg/0</slot>
<slot name="ConceptName" type="string">PAIN</slot>
<slot name="_score_ConceptName" type="string"></slot>
<slot name="SemanticType" type="string">Sign or Symptom</slot>
<slot name="BodyLocations" type="string">CHEST STRUCTURE</slot>
<slot name="_score_BodyLocations" type="string"></slot>
<slot name="SeverityStrings" type="string">INTERMITTENT</slot>
<slot name="UMLS_CUI" type="string">C0030193</slot>
```

```
<slot name="DaysBeforeDeath" type="int">0</slot>
<slot name="PAIN" type="string">Y</slot>
<slot name="MaxPain" type="int">1</slot>
<slot name="SeverityScale" type="int">1</slot>
<slot name="_score_SeverityScale" type="string"></slot>
<slot name="polarity" type="string">POSITIVE</slot>
<slot name="DocType" type="string"></slot>
<slot name="PatientID" type="int">0</slot>
<slot name="DateObject" type="record"/>
<slot name="enddate" type="date">
<date day="5" month="8" year="1998"/>
</slot>
<slot name="_score_enddate" type="string"></slot>
<slot name="startdate" type="date">
<date day="5" month="8" year="1998"/>
</slot>
<slot name="_score_startdate" type="string"></slot>
<slot name="Patient" type="string">PATIENT</slot>
<slot name="_score_Patient" type="string"></slot>
<slot name="_keyref" type="record"/>
<slot name="_score" type="string"></slot>
<slot name="_type" type="string"></slot>
</record>
<record id="21" template="HealthStatusRecord">
<slot name="ScoreType" type="string">HealthStatusRecord</slot>
```



<slot name="\_score\_ScoreType" type="string"></slot>  
<slot name="source" type="string">C:\i2b2 eval\Subsets\Test\900.txt</slot>  
<slot name="\_score\_source" type="string"></slot>  
<slot name="region" type="region">  
<region end="3640" start="3630">tenderness</region>  
</slot>  
<slot name="\_score\_region" type="string"></slot>  
<slot name="rule" type="string">HealthStatusItemPkg/0</slot>  
<slot name="ConceptName" type="string">TENDERNESS</slot>  
<slot name="\_score\_ConceptName" type="string"></slot>  
<slot name="SemanticType" type="string">Sign or Symptom</slot>  
<slot name="BodyLocations" type="string">ABDOMEN</slot>  
<slot name="\_score\_BodyLocations" type="string"></slot>  
<slot name="SeverityStrings" type="string">NO</slot>  
<slot name="UMLS\_CUI" type="string">C0234233</slot>  
<slot name="DaysBeforeDeath" type="int">0</slot>  
<slot name="PAIN" type="string">Y</slot>  
<slot name="MaxPain" type="int">1</slot>  
<slot name="SeverityScale" type="int">0</slot>  
<slot name="\_score\_SeverityScale" type="string"></slot>  
<slot name="polarity" type="string">POSITIVE</slot>  
<slot name="DocType" type="string"></slot>  
<slot name="PatientID" type="int">0</slot>  
<slot name="DateObject" type="record"/>  
<slot name="enddate" type="date">

```
<date day="5" month="8" year="1998"/>
</slot>
<slot name="_score_enddate" type="string"></slot>
<slot name="startdate" type="date">
<date day="5" month="8" year="1998"/>
</slot>
<slot name="_score_startdate" type="string"></slot>
<slot name="Patient" type="string">PATIENT</slot>
<slot name="_score_Patient" type="string"></slot>
<slot name="_keyref" type="record"/>
<slot name="_score" type="string"></slot>
<slot name="_type" type="string"></slot>
</record>
<record id="22" template="HealthStatusRecord">
<slot name="ScoreType" type="string">HealthStatusRecord</slot>
<slot name="_score_ScoreType" type="string"></slot>
<slot name="source" type="string">C:\i2b2 eval\Subsets\Test\900.txt</slot>
<slot name="_score_source" type="string"></slot>
<slot name="region" type="region">
<region end="1586" start="1582">pain</region>
</slot>
<slot name="_score_region" type="string"></slot>
<slot name="rule" type="string">HealthStatusItemPkg/0</slot>
<slot name="ConceptName" type="string">PAIN</slot>
<slot name="_score_ConceptName" type="string"></slot>
```

<slot name="SemanticType" type="string">Sign or Symptom</slot>  
<slot name="BodyLocations" type="string">RIGHT SIDED CHEST PAIN</slot>  
<slot name="\_score\_BodyLocations" type="string"></slot>  
<slot name="SeverityStrings" type="string"></slot>  
<slot name="UMLS\_CUI" type="string">C0030193</slot>  
<slot name="DaysBeforeDeath" type="int">0</slot>  
<slot name="PAIN" type="string">Y</slot>  
<slot name="MaxPain" type="int">1</slot>  
<slot name="SeverityScale" type="int">0</slot>  
<slot name="\_score\_SeverityScale" type="string"></slot>  
<slot name="polarity" type="string">POSITIVE</slot>  
<slot name="DocType" type="string"></slot>  
<slot name="PatientID" type="int">0</slot>  
<slot name="DateObject" type="record"/>  
<slot name="enddate" type="date">  
<date day="5" month="8" year="1998"/>  
</slot>  
<slot name="\_score\_enddate" type="string"></slot>  
<slot name="startdate" type="date">  
<date day="5" month="8" year="1998"/>  
</slot>  
<slot name="\_score\_startdate" type="string"></slot>  
<slot name="Patient" type="string">PATIENT</slot>  
<slot name="\_score\_Patient" type="string"></slot>  
<slot name="\_keyref" type="record"/>

```
<slot name="_score" type="string"></slot>
<slot name="_type" type="string"></slot>
</record>
</records>
</infStore>
<?xml version="1.0" encoding="UTF-8"?>
<infStore>
<records>
<record id="0" template="HealthStatusRecord">
<slot name="ScoreType" type="string">HealthStatusRecord</slot>
<slot name="_score_ScoreType" type="string">SPURIOUS</slot>
<slot name="source" type="string">C:\i2b2 eval\Subsets\Test\901.txt</slot>
<slot name="_score_source" type="string">SPURIOUS</slot>
<slot name="region" type="region">
<region end="403" start="397">angina</region>
</slot>
<slot name="_score_region" type="string">SPURIOUS</slot>
<slot name="rule" type="string">HealthStatusItemPkg/0</slot>
<slot name="ConceptName" type="string">ANGINA PECTORIS</slot>
<slot name="_score_ConceptName" type="string">SPURIOUS</slot>
<slot name="SemanticType" type="string">Sign or Symptom</slot>
<slot name="BodyLocations" type="string">CHEST</slot>
<slot name="_score_BodyLocations" type="string">SPURIOUS</slot>
<slot name="SeverityStrings" type="string"></slot>
<slot name="UMLS_CUI" type="string">C0002962</slot>
```

```
<slot name="DaysBeforeDeath" type="int">0</slot>
<slot name="PAIN" type="string">Y</slot>
<slot name="MaxPain" type="int">1</slot>
<slot name="SeverityScale" type="int">1</slot>
<slot name="_score_SeverityScale" type="string">SPURIOUS</slot>
<slot name="polarity" type="string">POSITIVE</slot>
<slot name="DocType" type="string"></slot>
<slot name="PatientID" type="int">0</slot>
<slot name="DateObject" type="record"/>
<slot name="enddate" type="date">
<date day="12" month="4" year="1996"/>
</slot>
<slot name="_score_enddate" type="string">SPURIOUS</slot>
<slot name="startdate" type="date">
<date day="12" month="4" year="1996"/>
</slot>
<slot name="_score_startdate" type="string">SPURIOUS</slot>
<slot name="Patient" type="string">PATIENT</slot>
<slot name="_score_Patient" type="string">SPURIOUS</slot>
<slot name="_keyref" type="record"/>
<slot name="_score" type="string">SPURIOUS</slot>
<slot name="_type" type="string"></slot>
</record>
</records>
</infStore>
```

```
<?xml version="1.0" encoding="UTF-8"?>
<infStore>
<records>
<record id="0" template="HealthStatusRecord">
<slot name="ScoreType" type="string">HealthStatusRecord</slot>
<slot name="_score_ScoreType" type="string"></slot>
<slot name="source" type="string">C:\i2b2 eval\Subsets\Test\912.txt</slot>
<slot name="_score_source" type="string"></slot>
<slot name="region" type="region">
<region end="1043" start="1033">discomfort</region>
</slot>
<slot name="_score_region" type="string"></slot>
<slot name="rule" type="string">HealthStatusItemPkg/0</slot>
<slot name="ConceptName" type="string">CHEST PAIN UNSPECIFIED</slot>
<slot name="_score_ConceptName" type="string"></slot>
<slot name="SemanticType" type="string">Sign or Symptom</slot>
<slot name="BodyLocations" type="string">CHEST</slot>
<slot name="_score_BodyLocations" type="string"></slot>
<slot name="SeverityStrings" type="string"></slot>
<slot name="UMLS_CUI" type="string">C1535568</slot>
<slot name="DaysBeforeDeath" type="int">0</slot>
<slot name="PAIN" type="string">Y</slot>
<slot name="MaxPain" type="int">1</slot>
<slot name="SeverityScale" type="int">1</slot>
<slot name="_score_SeverityScale" type="string"></slot>
```

```
<slot name="polarity" type="string">POSITIVE</slot>
<slot name="DocType" type="string"></slot>
<slot name="PatientID" type="int">0</slot>
<slot name="DateObject" type="record"/>
<slot name="enddate" type="date">
<date day="15" month="10" year="1999"/>
</slot>
<slot name="_score_enddate" type="string"></slot>
<slot name="startdate" type="date">
<date day="14" month="10" year="1999"/>
</slot>
<slot name="_score_startdate" type="string"></slot>
<slot name="Patient" type="string">PATIENT</slot>
<slot name="_score_Patient" type="string"></slot>
<slot name="_keyref" type="record"/>
<slot name="_score" type="string"></slot>
<slot name="_type" type="string"></slot>
</record>
<record id="1" template="HealthStatusRecord">
<slot name="ScoreType" type="string">HealthStatusRecord</slot>
<slot name="_score_ScoreType" type="string"></slot>
<slot name="source" type="string">C:\i2b2 eval\Subsets\Test\912.txt</slot>
<slot name="_score_source" type="string"></slot>
<slot name="region" type="region">
<region end="3191" start="3185">angina</region>
```

```
</slot>
<slot name="_score_region" type="string"></slot>
<slot name="rule" type="string">HealthStatusItemPkg/0</slot>
<slot name="ConceptName" type="string">ANGINA PECTORIS</slot>
<slot name="_score_ConceptName" type="string"></slot>
<slot name="SemanticType" type="string">Sign or Symptom</slot>
<slot name="BodyLocations" type="string">CHEST</slot>
<slot name="_score_BodyLocations" type="string"></slot>
<slot name="SeverityStrings" type="string"></slot>
<slot name="UMLS_CUI" type="string">C0002962</slot>
<slot name="DaysBeforeDeath" type="int">0</slot>
<slot name="PAIN" type="string">Y</slot>
<slot name="MaxPain" type="int">1</slot>
<slot name="SeverityScale" type="int">0</slot>
<slot name="_score_SeverityScale" type="string"></slot>
<slot name="polarity" type="string">POSITIVE</slot>
<slot name="DocType" type="string"></slot>
<slot name="PatientID" type="int">0</slot>
<slot name="DateObject" type="record"/>
<slot name="enddate" type="date">
<date day="17" month="10" year="1999"/>
</slot>
<slot name="_score_enddate" type="string"></slot>
<slot name="startdate" type="date">
<date day="17" month="10" year="1999"/>
```



```
</slot>
<slot name="_score_startdate" type="string"></slot>
<slot name="Patient" type="string">PATIENT</slot>
<slot name="_score_Patient" type="string"></slot>
<slot name="_keyref" type="record"/>
<slot name="_score" type="string"></slot>
<slot name="_type" type="string"></slot>
</record>
<record id="2" template="HealthStatusRecord">
<slot name="ScoreType" type="string">HealthStatusRecord</slot>
<slot name="_score_ScoreType" type="string">CORRECT</slot>
<slot name="source" type="string">C:\i2b2 eval\Subsets\Test\912.txt</slot>
<slot name="_score_source" type="string">CORRECT</slot>
<slot name="region" type="region">
<region end="3191" start="3185">angina</region>
</slot>
<slot name="_score_region" type="string">CORRECT</slot>
<slot name="rule" type="string">HealthStatusItemPkg/0</slot>
<slot name="ConceptName" type="string">ANGINA PECTORIS</slot>
<slot name="_score_ConceptName" type="string">CORRECT</slot>
<slot name="SemanticType" type="string">Sign or Symptom</slot>
<slot name="BodyLocations" type="string">CHEST</slot>
<slot name="_score_BodyLocations" type="string">CORRECT</slot>
<slot name="SeverityStrings" type="string"></slot>
<slot name="UMLS_CUI" type="string">C0002962</slot>
```

```
<slot name="DaysBeforeDeath" type="int">0</slot>
<slot name="PAIN" type="string">Y</slot>
<slot name="MaxPain" type="int">1</slot>
<slot name="SeverityScale" type="int">1</slot>
<slot name="_score_SeverityScale" type="string">INCORRECT</slot>
<slot name="polarity" type="string">POSITIVE</slot>
<slot name="DocType" type="string"></slot>
<slot name="PatientID" type="int">0</slot>
<slot name="DateObject" type="record"/>
<slot name="enddate" type="date">
<date day="17" month="10" year="1999"/>
</slot>
<slot name="_score_enddate" type="string">CORRECT</slot>
<slot name="startdate" type="date">
<date day="17" month="10" year="1999"/>
</slot>
<slot name="_score_startdate" type="string">CORRECT</slot>
<slot name="Patient" type="string">PATIENT</slot>
<slot name="_score_Patient" type="string">CORRECT</slot>
<slot name="_keyref" type="record">
<record ref="1"/>
</slot>
<slot name="_score" type="string">INCORRECT</slot>
<slot name="_type" type="string"></slot>
</record>
```

```
<record id="3" template="HealthStatusRecord">
  <slot name="ScoreType" type="string">HealthStatusRecord</slot>
  <slot name="_score_ScoreType" type="string"></slot>
  <slot name="source" type="string">C:\i2b2 eval\Subsets\Test\912.txt</slot>
  <slot name="_score_source" type="string"></slot>
  <slot name="region" type="region">
    <region end="3191" start="3185">angina</region>
  </slot>
  <slot name="_score_region" type="string"></slot>
  <slot name="rule" type="string">HealthStatusItemPkg/0</slot>
  <slot name="ConceptName" type="string">ANGINA PECTORIS</slot>
  <slot name="_score_ConceptName" type="string"></slot>
  <slot name="SemanticType" type="string">Sign or Symptom</slot>
  <slot name="BodyLocations" type="string">CHEST</slot>
  <slot name="_score_BodyLocations" type="string"></slot>
  <slot name="SeverityStrings" type="string"></slot>
  <slot name="UMLS_CUI" type="string">C0002962</slot>
  <slot name="DaysBeforeDeath" type="int">0</slot>
  <slot name="PAIN" type="string">Y</slot>
  <slot name="MaxPain" type="int">1</slot>
  <slot name="SeverityScale" type="int">0</slot>
  <slot name="_score_SeverityScale" type="string"></slot>
  <slot name="polarity" type="string">POSITIVE</slot>
  <slot name="DocType" type="string"></slot>
  <slot name="PatientID" type="int">0</slot>
```

```
<slot name="DateObject" type="record"/>
<slot name="enddate" type="date">
<date day="17" month="10" year="1999"/>
</slot>
<slot name="_score_enddate" type="string"></slot>
<slot name="startdate" type="date">
<date day="17" month="10" year="1999"/>
</slot>
<slot name="_score_startdate" type="string"></slot>
<slot name="Patient" type="string">PATIENT</slot>
<slot name="_score_Patient" type="string"></slot>
<slot name="_keyref" type="record"/>
<slot name="_score" type="string"></slot>
<slot name="_type" type="string"></slot>
</record>
<record id="4" template="HealthStatusRecord">
<slot name="ScoreType" type="string">HealthStatusRecord</slot>
<slot name="_score_ScoreType" type="string"></slot>
<slot name="source" type="string">C:\i2b2 eval\Subsets\Test\912.txt</slot>
<slot name="_score_source" type="string"></slot>
<slot name="region" type="region">
<region end="1281" start="1271">chest pain</region>
</slot>
<slot name="_score_region" type="string"></slot>
<slot name="rule" type="string">HealthStatusItemPkg/0</slot>
```

<slot name="ConceptName" type="string">CHEST PAIN UNSPECIFIED</slot>  
<slot name="\_score\_ConceptName" type="string"></slot>  
<slot name="SemanticType" type="string">Sign or Symptom</slot>  
<slot name="BodyLocations" type="string">CHEST</slot>  
<slot name="\_score\_BodyLocations" type="string"></slot>  
<slot name="SeverityStrings" type="string"></slot>  
<slot name="UMLS\_CUI" type="string">C1535568</slot>  
<slot name="DaysBeforeDeath" type="int">0</slot>  
<slot name="PAIN" type="string">Y</slot>  
<slot name="MaxPain" type="int">1</slot>  
<slot name="SeverityScale" type="int">1</slot>  
<slot name="\_score\_SeverityScale" type="string"></slot>  
<slot name="polarity" type="string">POSITIVE</slot>  
<slot name="DocType" type="string"></slot>  
<slot name="PatientID" type="int">0</slot>  
<slot name="DateObject" type="record"/>  
<slot name="enddate" type="date">  
<date day="15" month="10" year="1999"/>  
</slot>  
<slot name="\_score\_enddate" type="string"></slot>  
<slot name="startdate" type="date">  
<date day="15" month="10" year="1999"/>  
</slot>  
<slot name="\_score\_startdate" type="string"></slot>  
<slot name="Patient" type="string">PATIENT</slot>

```
<slot name="_score_Patient" type="string"></slot>
<slot name="_keyref" type="record"/>
<slot name="_score" type="string"></slot>
<slot name="_type" type="string"></slot>
</record>
<record id="5" template="HealthStatusRecord">
<slot name="ScoreType" type="string">HealthStatusRecord</slot>
<slot name="_score_ScoreType" type="string">CORRECT</slot>
<slot name="source" type="string">C:\i2b2 eval\Subsets\Test\912.txt</slot>
<slot name="_score_source" type="string">CORRECT</slot>
<slot name="region" type="region">
<region end="1281" start="1271">chest pain</region>
</slot>
<slot name="_score_region" type="string">CORRECT</slot>
<slot name="rule" type="string">HealthStatusItemPkg/0</slot>
<slot name="ConceptName" type="string">CHEST PAIN</slot>
<slot name="_score_ConceptName" type="string">INCORRECT</slot>
<slot name="SemanticType" type="string">Sign or Symptom</slot>
<slot name="BodyLocations" type="string">CHEST</slot>
<slot name="_score_BodyLocations" type="string">CORRECT</slot>
<slot name="SeverityStrings" type="string"></slot>
<slot name="UMLS_CUI" type="string">C0008031</slot>
<slot name="DaysBeforeDeath" type="int">0</slot>
<slot name="PAIN" type="string">Y</slot>
<slot name="MaxPain" type="int">1</slot>
```

```
<slot name="SeverityScale" type="int">1</slot>
<slot name="_score_SeverityScale" type="string">CORRECT</slot>
<slot name="polarity" type="string">POSITIVE</slot>
<slot name="DocType" type="string"></slot>
<slot name="PatientID" type="int">0</slot>
<slot name="DateObject" type="record"/>
<slot name="enddate" type="date">
<date day="15" month="10" year="1999"/>
</slot>
<slot name="_score_enddate" type="string">CORRECT</slot>
<slot name="startdate" type="date">
<date day="15" month="10" year="1999"/>
</slot>
<slot name="_score_startdate" type="string">CORRECT</slot>
<slot name="Patient" type="string">PATIENT</slot>
<slot name="_score_Patient" type="string">CORRECT</slot>
<slot name="_keyref" type="record">
<record ref="4"/>
</slot>
<slot name="_score" type="string">INCORRECT</slot>
<slot name="_type" type="string"></slot>
</record>
<record id="6" template="HealthStatusRecord">
<slot name="ScoreType" type="string">HealthStatusRecord</slot>
<slot name="_score_ScoreType" type="string">CORRECT</slot>
```

<slot name="source" type="string">C:\i2b2 eval\Subsets\Test\912.txt</slot>  
<slot name="\_score\_source" type="string">CORRECT</slot>  
<slot name="region" type="region">  
<region end="1428" start="1419">pain free</region>  
</slot>  
<slot name="\_score\_region" type="string">CORRECT</slot>  
<slot name="rule" type="string">HealthStatusItemPkg/0</slot>  
<slot name="ConceptName" type="string">ABSENCE OF PAIN</slot>  
<slot name="\_score\_ConceptName" type="string">CORRECT</slot>  
<slot name="SemanticType" type="string">Sign or Symptom</slot>  
<slot name="BodyLocations" type="string"></slot>  
<slot name="\_score\_BodyLocations" type="string"></slot>  
<slot name="SeverityStrings" type="string"></slot>  
<slot name="UMLS\_CUI" type="string">C0234225</slot>  
<slot name="DaysBeforeDeath" type="int">0</slot>  
<slot name="PAIN" type="string">Y</slot>  
<slot name="MaxPain" type="int">1</slot>  
<slot name="SeverityScale" type="int">0</slot>  
<slot name="\_score\_SeverityScale" type="string">CORRECT</slot>  
<slot name="polarity" type="string">POSITIVE</slot>  
<slot name="DocType" type="string"></slot>  
<slot name="PatientID" type="int">0</slot>  
<slot name="DateObject" type="record"/>  
<slot name="enddate" type="date">  
<date day="15" month="10" year="1999"/>



```
</slot>
<slot name="_score_enddate" type="string">CORRECT</slot>
<slot name="startdate" type="date">
<date day="15" month="10" year="1999"/>
</slot>
<slot name="_score_startdate" type="string">CORRECT</slot>
<slot name="Patient" type="string">PATIENT</slot>
<slot name="_score_Patient" type="string">CORRECT</slot>
<slot name="_keyref" type="record"/>
<slot name="_score" type="string">CORRECT</slot>
<slot name="_type" type="string"></slot>
</record>
<record id="7" template="HealthStatusRecord">
<slot name="ScoreType" type="string">HealthStatusRecord</slot>
<slot name="_score_ScoreType" type="string"></slot>
<slot name="source" type="string">C:\i2b2 eval\Subsets\Test\912.txt</slot>
<slot name="_score_source" type="string"></slot>
<slot name="region" type="region">
<region end="1281" start="1271">chest pain</region>
</slot>
<slot name="_score_region" type="string"></slot>
<slot name="rule" type="string">HealthStatusItemPkg/0</slot>
<slot name="ConceptName" type="string">CHEST PAIN UNSPECIFIED</slot>
<slot name="_score_ConceptName" type="string"></slot>
<slot name="SemanticType" type="string">Sign or Symptom</slot>
```

<slot name="BodyLocations" type="string">CHEST</slot>  
<slot name="\_score\_BodyLocations" type="string"></slot>  
<slot name="SeverityStrings" type="string"></slot>  
<slot name="UMLS\_CUI" type="string">C1535568</slot>  
<slot name="DaysBeforeDeath" type="int">0</slot>  
<slot name="PAIN" type="string">Y</slot>  
<slot name="MaxPain" type="int">1</slot>  
<slot name="SeverityScale" type="int">1</slot>  
<slot name="\_score\_SeverityScale" type="string"></slot>  
<slot name="polarity" type="string">POSITIVE</slot>  
<slot name="DocType" type="string"></slot>  
<slot name="PatientID" type="int">0</slot>  
<slot name="DateObject" type="record"/>  
<slot name="enddate" type="date">  
<date day="15" month="10" year="1999"/>  
</slot>  
<slot name="\_score\_enddate" type="string"></slot>  
<slot name="startdate" type="date">  
<date day="15" month="10" year="1999"/>  
</slot>  
<slot name="\_score\_startdate" type="string"></slot>  
<slot name="Patient" type="string">PATIENT</slot>  
<slot name="\_score\_Patient" type="string"></slot>  
<slot name="\_keyref" type="record"/>  
<slot name="\_score" type="string"></slot>

```
<slot name="_type" type="string"></slot>
</record>
<record id="8" template="HealthStatusRecord">
  <slot name="ScoreType" type="string">HealthStatusRecord</slot>
  <slot name="_score_ScoreType" type="string"></slot>
  <slot name="source" type="string">C:\i2b2 eval\Subsets\Test\912.txt</slot>
  <slot name="_score_source" type="string"></slot>
  <slot name="region" type="region">
    <region end="1043" start="1033">discomfort</region>
  </slot>
  <slot name="_score_region" type="string"></slot>
  <slot name="rule" type="string">HealthStatusItemPkg/0</slot>
  <slot name="ConceptName" type="string">CHEST PAIN UNSPECIFIED</slot>
  <slot name="_score_ConceptName" type="string"></slot>
  <slot name="SemanticType" type="string">Sign or Symptom</slot>
  <slot name="BodyLocations" type="string">CHEST</slot>
  <slot name="_score_BodyLocations" type="string"></slot>
  <slot name="SeverityStrings" type="string"></slot>
  <slot name="UMLS_CUI" type="string">C1535568</slot>
  <slot name="DaysBeforeDeath" type="int">0</slot>
  <slot name="PAIN" type="string">Y</slot>
  <slot name="MaxPain" type="int">1</slot>
  <slot name="SeverityScale" type="int">1</slot>
  <slot name="_score_SeverityScale" type="string"></slot>
  <slot name="polarity" type="string">POSITIVE</slot>
```

```
<slot name="DocType" type="string"></slot>
<slot name="PatientID" type="int">0</slot>
<slot name="DateObject" type="record"/>
<slot name="enddate" type="date">
<date day="15" month="10" year="1999"/>
</slot>
<slot name="_score_enddate" type="string"></slot>
<slot name="startdate" type="date">
<date day="14" month="10" year="1999"/>
</slot>
<slot name="_score_startdate" type="string"></slot>
<slot name="Patient" type="string">PATIENT</slot>
<slot name="_score_Patient" type="string"></slot>
<slot name="_keyref" type="record"/>
<slot name="_score" type="string"></slot>
<slot name="_type" type="string"></slot>
</record>
<record id="9" template="HealthStatusRecord">
<slot name="ScoreType" type="string">HealthStatusRecord</slot>
<slot name="_score_ScoreType" type="string">CORRECT</slot>
<slot name="source" type="string">C:\i2b2 eval\Subsets\Test\912.txt</slot>
<slot name="_score_source" type="string">CORRECT</slot>
<slot name="region" type="region">
<region end="1043" start="1033">discomfort</region>
</slot>
```

<slot name="\_score\_region" type="string">CORRECT</slot>  
<slot name="rule" type="string">HealthStatusItemPkg/0</slot>  
<slot name="ConceptName" type="string">DISCOMFORT</slot>  
<slot name="\_score\_ConceptName" type="string">INCORRECT</slot>  
<slot name="SemanticType" type="string">Sign or Symptom</slot>  
<slot name="BodyLocations" type="string">CHEST</slot>  
<slot name="\_score\_BodyLocations" type="string">CORRECT</slot>  
<slot name="SeverityStrings" type="string"></slot>  
<slot name="UMLS\_CUI" type="string">C2737161</slot>  
<slot name="DaysBeforeDeath" type="int">0</slot>  
<slot name="PAIN" type="string">Y</slot>  
<slot name="MaxPain" type="int">1</slot>  
<slot name="SeverityScale" type="int">1</slot>  
<slot name="\_score\_SeverityScale" type="string">CORRECT</slot>  
<slot name="polarity" type="string">POSITIVE</slot>  
<slot name="DocType" type="string"></slot>  
<slot name="PatientID" type="int">0</slot>  
<slot name="DateObject" type="record"/>  
<slot name="enddate" type="date">  
<date day="14" month="10" year="1999"/>  
</slot>  
<slot name="\_score\_enddate" type="string">INCORRECT</slot>  
<slot name="startdate" type="date">  
<date day="14" month="10" year="1999"/>  
</slot>

```
<slot name="_score_startdate" type="string">CORRECT</slot>
<slot name="Patient" type="string">PATIENT</slot>
<slot name="_score_Patient" type="string">CORRECT</slot>
<slot name="_keyref" type="record">
<record ref="8"/>
</slot>
<slot name="_score" type="string">INCORRECT</slot>
<slot name="_type" type="string"></slot>
</record>
</records>
</infStore>
```

## Appendix References

1. Savova GK, Kipper-Schuler KC, Buntrock JD, Chute CG. UIMA-based Clinical Information Extraction System. UIMA Workshop 2008; 2008 May 31, 2008; Marrakech, Morocco; 2008.
2. Uzuner O, Solti I, Xia F, Cadag E. Community annotation experiment for ground truth generation for the i2b2 medication challenge. J Am Med Inform Assoc. 2010 Sep-Oct;17(5):519-23.
3. Childs LC, Cassel D. Extracting and Normalizing Temporal Expressions. TIPSTER '98. Baltimore, MD: Association for Computing Machinery; 1998.

4. Friedman C, Hripcsak G, DuMouchel W, Johnson SB, Clayton PD. Natural Language Processing in an Operational Clinical Information System. *Natural Language Engineering*. 1995;1(1):83-108.
